# Supplementary material for: Genome-wide identification of candidate chemosensory receptors in the bean bug Riptortus pedestris (Hemiptera: Alydidae) and the functional verification of its odorant receptor co-receptor (Orco) in recognizing aggregation pheromone
Source: Front Physiol. 2023 Jul 14;14:1224009. doi: 10.3389/fphys.2023.1224009 (PMC10375722; doi:10.3389/fphys.2023.1224009)
Supplement: Supplementary file 1 [file Table2.XLSX]

## Sheet: Sheet1
Supplementary Table S2. Primer sequences for RpedOR genes used in qRT-PCR and RNA interference
Gene name	Gene id	Forward primer (5′- 3′)	Reverse primer (5′- 3′)	Application
Actin	Rp.chr5.2308	CACCAATGTTCGTATGCG	GCCTTCTTCAATGCCAAAG	reference gene
RpedOrco	Rp.chrX.0497	CGGAGTGATTACCATCTTCTC	GAGTTGAGGCATTTCTACCG	qRT-PCR
RpedOR24	Rp.chr4.0342	CCGATGAGACTACTCCATAC	GCCTGATAGGGCAACAAG	qRT-PCR
RpedOR37	Rp.chr4.1699	GCGACAAAGAAACTGACGC	GTATGCCAGCACTACAAGAAAG	qRT-PCR
RpedOR38	Rp.chr4.0587	GCAGTTCCTCTTGTGTGC	GCTTCTACATCATCTTCGCC	qRT-PCR
RpedOR41	Rp.chr1.4449	CCAGGTGTTCGTCATAGTC	CTTCAGGCTCTTGTTTGC	qRT-PCR
RpedOR43	Rp.chr4.1089	CCTTCCAACAAAGAGCAAC	GTGAGTAAGAATCCTGGCG	qRT-PCR
RpedOR60	Rp.chr4.2110	CGTGAGACATTGTGGAGCAC	GCATTCTTTCGGCAAATCG	qRT-PCR
RpedOR65	Rp.chr1.4273	CCAGTTGGTATCAGGCTACG	AGAAGTCTGCCGATGGTG	qRT-PCR
RpedOR66	Rp.chr3.0658	GTGCCATCTATTTCGCTG	CCTCATCCTCGTATTCGTAG	qRT-PCR
RpedOR71	Rp.chr2.3190	GTGGTTCGTCATCGGTGT	GCATTTCCTTGTGGTAGAGG	qRT-PCR
RpedOR74	Rp.chr1.4282	GGCATTGGTGCTCGTAGTA	CCTTTCGGAGAAGAGTCTG	qRT-PCR
RpedOR83	Rp.chr3.2452	CGGTCTTTATCTTCCTTGG	CGATTCCTCATACTCTCC	qRT-PCR
RpedOR105	Rp.chr4.1670	GACGATGCTGGACAACCTA	CCGTGCCGAATGTAAATAC	qRT-PCR
RpedOR106	Rp.chr2.3334	CGTTCAACAGAGGCATTG	GCGACAAGTGGAAGAAGACT	qRT-PCR
RpedOR110	Rp.chr2.1322	GGAAGAGGAAGGTATTAGCC	AGTCCAAGCATAAGCGATG	qRT-PCR
RpedOR167	Rp.chr3.0802	CACTCTCCTTCTCTTCTCC	CGCTCCATTGATGACATTAC	qRT-PCR
dsRpedOrco	Rp.chrX.0497	TAATACGACTCACTATAGGGAGAGTTACCAAATTCGGCTACTTCG	TAATACGACTCACTATAGGGAGACAAATGTTTCAGTTGCTCGC	dsRNA synthesis
dsGFP	No. U50963	TAATACGACTCACTATAGGGAGATGGTCCCAATTCTCGTGGAAC	TAATACGACTCACTATAGGGAGACTTGAAGTTGACCTTGATGCC	dsRNA synthesis
