# Supplementary material for: Genome-wide identification of candidate chemosensory receptors in the bean bug Riptortus pedestris (Hemiptera: Alydidae) and the functional verification of its odorant receptor co-receptor (Orco) in recognizing aggregation pheromone
Source: Front Physiol. 2023 Jul 14;14:1224009. doi: 10.3389/fphys.2023.1224009 (PMC10375722; doi:10.3389/fphys.2023.1224009)
Supplement: Supplementary file 2 [file Table3.XLSX]

## Sheet: ORs
Supplementary Table S3. Summary of chemosensory receptors in Riptortus pedestris.
Gene name	Gene id	protein sequences	ORF(aa)	Number of Exons	BLASTx best hit (Reference/Name/Species)	E value	Identity (%)	Pfam	Interpro	TMM value in RNA-Seq
										2nd	3rd	4th	5th	Female	Male
RpedOrco	Rp.chrX.0497	MQKIKMHGLVGDLWPNIRLMQLTGHWLLEYHEETGGMIRLIRLGYCWLTTVLVVLQFAFLACFLILDTYDADQMAAATITTLFFLHSVTKFGYFAVRSKYFYRTLGAWNQVNSHPLFAESNARHRATALSRMRKLLMIIGVITIFSVLAWTTVTFLGDPHREITDPENENATITVEMPQLMVDAWYPWDAKTGMTYFLTFIYQLYWLFMSLSHANLLDILFCSFVIFACEQLKHLKEILQPLMELSATLDSVVPNSGDLFRATSTGSNLPLISNENGNDFDIRGIYSNRGDYSGFQTGVSTIQNNGGGIGPNGLTKKQELLVRSAIKYWVERHKHVVKFVSSIGDAYGSALLLHMLTSTVTLTLLAYQATKIEGVDVYASTVIGYLLYTLGQVFVFCIH…	474	9	QQP19790.1 | olfactory co-receptor [Tropidothorax elegans]	0	94.94	7tm_6	IPR004117: Olfactory receptor, insect	24.758	7.932	3.461	22.961	59.633	85.411
RpedOR2	Rp.chr1.4001	MNNKEGIKKEVGGDKSYDILLEKEWLFNLLGYGRYTGVLYTIYKYTWVLFFLYSLYMAFYGIYLAMLNDNMELIISGIHVIMTGLFFVWGSVTRYVTVTSVERARDMILSGFFAYEGEEKDEHIEKMLRDGIKSLRKSCNIVMYAMFSGIASNIIMFPMSQYSNVPNEKYEQVVDIASPYLPHSIHTPFSTRTLPGFMVAYLQNALFQLGINGITVTMTEIYVGTWGQLKLQLDVLNYSLRNIQNRAASLYFKRRPSVSSQSARLQDLWDDPEYQKCLVNCLRSNILHHLALLRFKKNLAAYCGSCLLIAVLIAGLTFATSLAQVMIGQPPNLMIHYSCVLIGEQFYAFFLCYMGEQILQASSDLFESLYATPWFNCTKSWNKLLRIFMANTKEPMKVE…	1131	5	QQP19728.1 | olfactory receptor 33 [Tropidothorax elegans]	7e-65	36.52	7tm_6	IPR004117: Olfactory receptor, insect	2.699	1.239	0.371	0.625	1.911	1.591
RpedOR3	Rp.chr4.2835	MALIQSFINFLKDYYEDDPVTDQVLARDYFNVVKFAGFYPSSSRKYIPLTLLHLGVFMSVLLYHAVLLTRTILVFSELNFTITVFEFQELLLIIFSIFTLILLNINRRPFRILHSEMIYKFFEYEQQNDEIIASFRKQMRSEKLQLLLLIFLTGIAAANVLFVSPILDNVYGHRDFNASRYNIDMDLAIPLIYPIPLDNTMIRLFANFLLLICATVVVSVIATASFLFINVSIYLSLNLKYLSMGIENLEPRSHKLYKQRYGEQKIKNLYSDKRFILCYEYCLKKSFQHHQLIIRALHSQEHSSHLLYCISGHFTPRNTLIICSIVFQGTSLPGTLSSSALLYFRALHSQEHSSHLLYCISGHFTPRNTLLICSIVFQGTSLPGTLFSSALLYFRALHS…	776	2	AXX83060.1 | odorant receptor [Yemma signatus]	1e-42	37.22	—	—	0	5.651	5.489	7.373	8.486	6.142
RpedOR4	Rp.chr4.2363	MKLIKYIKQVKYVDDSVEKTNSFLENGGIYMKLGCLYNVPRYASYFMVVAFTIFFHQGAYTVYLCAIEDELEMGAEGLHFTICLFWGIAFTLTPQLERKHYNNIYRTLAEGFFNYNDTLDPETAAKAEEIKKKCFKRKIMWSRRMEVAYNVFGFFCLGVFPIVGGKYSTPEVDDTFLRQAPIQAWFPYETKSLAGYSGALFTEYVFSFLSVCILDGTDIPFLCCSEELLYELEVLNLTLRNTSQRAKYIFKKRFGREPNLLKDNKRFSKCIQECFRDTIRHHYAVNRYFFELNRAYRKILAVVLASGALLLCMAGIIFYSRRFTVGAKLSFLLYMLGELTHIFAFCYYGQQISEQSVKVRDSTYQMDWANFSKSASPYITMLQIFLNQPLKLRSSGGFF…	759	15	AXX83055.1 | odorant receptor [Yemma signatus]	1e-70	37.35	7tm_6	IPR004117: Olfactory receptor, insect	0	1.845	2.392	1.675	2.776	2.369
RpedOR5	Rp.chr4.0095	MESRERGRATTYHDFFNDRRWLMLVGAYGNYTHPLYLAYRFSLLLLHSFLQSMAIYACIISPDKVMMIDALHVYFISSFATWGLITRFLTEQNLQRTRNLIMSGIYQYEDEELDEEQVKMKEGIIDEVRRKSVRFIFVFSVGTFSNMVFFPISQLVLLDEDPNEDHSSEIVNPYLPHVFYTPFSTRNIWGYSLAYILSAALLLYVYGVAMCMNEIFLSCIIQLKIQLRILGYSISNIQQRAFTKYIRNNNLIPQDVSQDELFENAEFQKCLYSCFKANIKHHQALIRFKKELQIYGGACMLDTVILGTLKYATALYLGFQKLPMNFVINHFTTFLVEQTYPFYECVYGEEIIKESSLLFEMLYRMPWFRFNRSLVKALDIVMSNSVRPMRIKALFLNAS…	715	7	QQP19760.1 | olfactory receptor 65 [Tropidothorax elegans]	5e-78	36.26	7tm_6	IPR004117: Olfactory receptor, insect	0	10.05	4.003	6.026	15.914	15.153
RpedOR6	Rp.chr4.0058	MATITWPWNRKRLRDAWNWPIHYILNCYGWWAEEASTPFLRLFLWWLRFFLLISVFFNFWAMMVAVFIKFSQGDIMVNLFSVFAAGPGVVGTYKIIDIVWHRKILKSGFDIIDVMLDETEPEFEYIVRSGLRRSWIMFTICLTFDIGITAHWLFRPVAVAIFHGERTLIVDTWPVFTDTWIQWFFTYLFQGVNVCLCGHTFYAYDIIYFCVAENLLCQLNVLKARLTSLTMDGSNRSQATIDKCIKHHNQILRACEKLRDATAGVIMFQCVNTVIMLCTGVFILLLMDGINMSILMNLGEISIYVTLILFVYCWYSNEMTYQCANLVTSGYMVDWVGGTTVEKSKLHNLMTMSMQRMIFGGIVEIDLNTFINEKLDPSEKQKYYKKGYEDLRFVLLRNG…	660	7	QQP19706.1 | olfactory receptor 11 [Tropidothorax elegans]	2e-177	67.83	7tm_6	IPR004117: Olfactory receptor, insect	0	14.853	8.144	11.449	19.791	19.82
RpedOR7	Rp.chr3.2453	MNGRFRERVAVPSQCSFEKSIQKYPGIFEAIVIEQCVAQVLPGFLKLVVDCLILGLYKITTLYFAYLSTSLKTIQREMISTGRPPKEFIVWLKIHQDAITIFQEMTSFFSPVFVLYSLSSIALVTCGLFFQLEAKSSNMIQTVSGGGFMALTMFQLYLICNVADEVSTAAQKVAFDVYSLPWYDMDTTTKKCVKLSITLANHPLRVTGFKTSAFKMCREAFLENKQSNKECRQLTLVKFYLIGASLYFFYGLFPCLFFFSSGKRCGRAIKFSNGINEKIIGGNLSDREYFAELYESNAKKLTMFAKFMSVNTFLCATLYCSSVPLLDLMNGRFRERVTVPSQCPFEKKIYRQPGIFESIVLEQIIAYLIPGFQKFVTDCIMLGLYRITGMYFSYLSKSL…	572	12	QQP19705.1 | olfactory receptor 10 [Tropidothorax elegans]	2e-77	39.82	7tm_6	IPR004117: Olfactory receptor, insect	2.093	0.851	0.244	0.617	1.473	1.65
RpedOR8	Rp.chr3.2473	MRTLRIIEYPSASNSSSVSSGQGMTELRFIQSYRTVLHHAKLAGLPLPPLGDESYTTTRIYRIFVIVVGVFLVWKLTCTTRFVLFGGFMEKMIAETVEMLVSTGLALSIVYGSSMGSITRLITSTDDLSSDIVKSGLEPEHVYSNLFLQDSNLVTTLNKMVCASMFMSPFIFCLSVPIMDYFRGNYRGRFPVPAHCPFEKKSPGFYEISVLLLILTSLFPALQRIGNEFICIGFFRVQTAYYKYLSAAIKAIGLKISREFPEETNKKLVKWIKLHQIVLKNVADFQHILSPIVIVYYLSMIGILACGLFYQLNAEKMAKELYYIPWYKLQLKDKAYLRFVIHIANRPISMKAYKANYFSMSKEAFVGALCLVTTATTLHTLTTFLTVFFLIWKNDFKNL…	564	9	QQP19710.1 | olfactory receptor 15 [Tropidothorax elegans]	2e-64	34.66	7tm_6	IPR004117: Olfactory receptor, insect	6.298	4.641	1.732	2.504	7.002	8.526
RpedOR9	Rp.chr2.1321	MRENLIVCCSIVAGSVTFFKFIMLLRKKKVLAELTRQLKGFRPSTNSGKYTRWFTYLYEGMAIYFNISCVLMVLTGKSPDDHSLSFPIWHPVELNTTLRKVIALFILHIAVAYVWGCMVLTDTYLLHLTNQLCDRLWTLNRTLRLAGLSDEEKELDISQNKVLVLENYSDANIVQSCLAEHILLLKLRSELGHMLNETFLYQVINSMSVLMVVMYIFTNSENFLNDAIEFTGVLVVELIQVLTTCLSGELLKSRSEAIHFALYNSRWYDSDPKIKTSLLIMATYATREVDLKGSYVFNLSLATYETFVLCFIGPIYPIWHPIEINTPIRKFASFGMLHITVAYVWTCMVLTDTFLLHASNQLCDRFRTLGQTLSLSGLTMNEKESKKARSRVLILDSYQ…	552	13	KAE8573746.1 | Odorant receptor 140 [Halyomorpha halys]	8e-69	48.44	7tm_6	IPR004117: Olfactory receptor, insect	7.065	8.38	6.7	14.581	19.46	25.237
RpedOR10	Rp.chr4.0104	MINEGIFNYPEDAEEEDEVRIKSEIPVDIRKKTKTFMIVYSIGLTINVIVFPISQLLMVGSDDPRRDDPLVNPYLPPMYFVYNPFPLNSSSGFWCGYAVVLITLLSVYSPTTCMSEIFVVCSAQLKIHSKLLNHSIANLQKRALKMFSKSNVDLRNTSLDELFFNREYQRCLYTCFKANIQHHQALLRFKKACQPYCGSILLNTVTIALICYACGLYLILAGLPINYTICYIVCLSTEQTYVFYVNIFGEEILQESSKFFETLYGMPWFNYSKSFNKSVSIMMSFTKKPLSLRALLLDVAASLETYGDVDAVFYTSRVVSQNMKYQAVIANLDFEVLTQIADMLTEPDRDAPYDKLKERLIQIYGDSETRRIKKLLEDTQLGNQQPSQLLRRMLQQAGQ…	533	5	QQP19760.1 | olfactory receptor 65 [Tropidothorax elegans]	1e-60	34.69	7tm_6	IPR004117: Olfactory receptor, insect	0	0.799	0.393	1.192	1.976	2.529
RpedOR11	Rp.chr3.2462	MFNLSNPLDVKKVHQLLFDGCDDEEPSLDSPSGPSVGPPNPMPDVPEEDCDTEAEEEIEVREESSDTEQSDVEATSDSDEGGFEEVIEVIQNSEEAILREVKLWYIMCKAGGFEAVIEVIPIYEEASTSQRSQAIAHYVQGRTILQIGKGFGLPLPWDQETPTMKIVHTCWEILVQLFLFYKLVCALLAFQIYPTFEENVFGSAVSIFQGFGFFVSLFYIVKRSGFEEIIQKMDSLSQEIMDSGLGTEDFFQDLCKLDASRISKFALFLTPCSVMCPLMFCSSVPISGLMNGNYGERLPVYNRCPFETNDPGVYEYLVFQQFLGFLLPTFQKLGHECVMLGLFRLQSAYFKSLSAALTEMSKDIENDSQYIQVKMKKWVQLHQASLRSADDLVQFFSPV…	531	9	QQP19710.1 | olfactory receptor 15 [Tropidothorax elegans]	6e-109	43.18	7tm_6	IPR004117: Olfactory receptor, insect	9.109	6.93	4.295	8.473	11.936	13.368
RpedOR12	Rp.chr2.3431	MASVKALDIYEEYRWPIILVGFGQDGGRILYPAYIIIIFIINTYMGAAALYATFFLDSKDSIINAIHMIIGSIFCTWCLASNILTHRSMVDIRRMTIEGIYKYEDEEADREEDRMKREGREEVKARIETIGLMYIVGFFSNMIFFPLTQYMMLEERTPGTVNPYLPHVFYSPFDTRSLLGYSAAYLMDFLFWLNIYTSSVVINALYISFTAQLKAHLRLLNYSLSNLHRRAVSKYNRLGQVSQADLGQGDHFQDCLYLCFKANLQHHQAILRFKEEGRAFIGSILFIMFTLASLIYATILYCLFQNPPVNVLINYALTSLAEQTLPIMLTRFKKALRLMMFHAQKPIEIKAMLLNVASCLQSYGDVSTSFYYILAQGSRKPPPHDVPRPEAHRDQGYAP…	527	7	QQP19760.1 | olfactory receptor 65 [Tropidothorax elegans]	2e-45	31.16	7tm_6	IPR004117: Olfactory receptor, insect	4.103	1.732	1.456	2.143	3.197	4.604
RpedOR13	Rp.chr1.4246	MLTFETRSTQDKSQCKGNVYFEESVLRTRYAPTLHHNVNPSAPAILRTSHNVRVQLSLYSRMEVKHGNDLLQNKNDLIPFYDFLSERKFFVFISGQSIIGRGKIWLTLNRLYVASIVIFLTYTMTLTGGAVAFGTDDKIIMMVAGHFFMLTVLLISVLFIRTVYDESHKSASKCIREGIFRYEYEETEMHNLRRNGVEYTRKLTTYLTNILIVGISMTYIILPSGKLLISNEESAGKTINPYLPIPAYIPFDTESRLGFGIAWGILIAYGWYLMTGVISLNETYVSCAIQLKTQLEILNYSLKIIEKRAFIKLFKSNQASSYDSANVKELYARSEFQEALYLCLRENIRHHQVLVSNHIAYAPLPSNRIAYAASPSNHIAYAPLPSNRIAYAASPSNHI…	525	3	AXX83013.1 | odorant receptor [Yemma signatus]	4e-33	31.65	—	—	7.648	7.419	6.247	9.278	14.04	15.492
RpedOR14	Rp.chr4.0096	MAPANDKPERKSTKENELHDFFYDRPFLFNLVGYGPSTGPLYIARRVTWYTLNILWQSMAWYALYLSAPKKDLMINALHFQLLSSFGLWGLSTRLLTYRSLSKARDMIRSGVYTYIGEDMDDEEEMLRGGISSEIRRRSNFSLLVYTIGASTNMVLFPISQIFMLSEEPEEDFVNPYLPHFFYVPFSTRNFLGYTAAYLLDTLLLVYVYGMAVSMNETYLSCVVHLKTHLKILNHSINNIERRAFNMYLRSNNSPAELTLDDLMDNTQFQACLYSCLKANVKHHQTLLVFKKQCTPAVGSYILDTMLLATLIYATVLYLIMLNPPLNIAANDIMTLVAEQTYAFCLCVFGEEIIEQTLEVDPMAGPDRLPCQHSGMRKSRLTSSDSYHRVQRLWRSDRV…	515	6	QQP19760.1 | olfactory receptor 65 [Tropidothorax elegans]	2e-53	35.2	7tm_6	IPR004117: Olfactory receptor, insect	0	6.381	3.929	3.701	12.676	11.691
RpedOR15	Rp.chr2.0637	MKKKSESVVFNHRGSRKLLKIVCCLDFVNGSKMVRIFNYVYIGLVCSLLIIVISQGVILGCTAKQTAVKVEAIHYTLVIIIILAYISNELYNHSRLSKAWALLMFAYNHFNGDTISDEQKEFHRSNAKIAQGWNYLFSVLMSAASLAYLFFTPIREALLQDPQAPKSLPIPMYMPFEASHNPGYWLAILWEGITLLFLCGVATSTHLSYIGYMGALRAEFRLLNYSISSLEKRAAKRFGITDVALDTYKDQQFQSCLYMCIREDIIHHQLLVQYYKLIKDYLGFILLIYIVVSSIILAAAGYLISRPNSPTEETIKFVVIVCSELWYIFCLCWFGEKVSEEGVAVGQCPRARKCSLQGGSAGSCRGSGLGEGRLRKMRSPSFIHVDLSAGLVAFSLRFN…	501	6	AXX83032.1 | odorant receptor [Yemma signatus]	7e-124	55.62	7tm_6	IPR004117: Olfactory receptor, insect	8.63	6.802	4.874	5.636	7.776	6.636
RpedOR16	Rp.chr3.2464	MAYTKIYSDPEDIRRLLEALEKEDQDLVEDACSSDEKEEAIDFSLEHLLVVYLPSKSNASSLCNIDMDVGSHSEPQQKVPKLEDRVIAECSAVLKMISLLLVVIFTIWSQGLGDLIDHVDETSKMIQNSVFGGKRIYVSTYQNDSSKFEILYKTMCYSTIVCTFFFCLSIPIIEYLNGVYGSSMAAPTDCNYENGSYGLYEFFWFLQFAGFIMPALHKLGNEYIMFALIRVQSAMFKYLSECMKEVASEMSHTNKHKAKENLMKLAIINQESLKFGPSTLPSGSSGPTTAYHPGDLVPNYIVIMKNLPLNITIWKLGPSNTYHPRDLVPNYIVIIKILPLNITIWKLWPLNHLPSRRSGPQLHCHHEDLAPQHYHLEALAPQPPTIQEIWSPTTLSSRR…	491	4	QQP19755.1 | olfactory receptor 60 [Tropidothorax elegans]	3e-31	32.64	—	—	0.314	0.248	0.71	0.431	0.214	0.641
RpedOR17	Rp.chr2.2727	MDTEEQTIPKPYDCFVESKWMFILLGYAQVDTKWFKCYKALILLFNTYYLAMESYALIRYLPTNKDLAIDALNVWICTIWSYWCLGARILTSRYIKQAQDMANAGVYIYKDEAMDEGQLELRRGLKEDVLRKSKFLACIYGSGMTGVMFVFPLVEYLFYRNSERHKGYLSSPYLPHVLYVPFDTESFLGFTLAYLIDIYYWFLCCGSAVATNRIVVSFIVQIRVQLKILNHSLRNIEKRAYYLYAKKYNVSHDKASMADLLQKKEFQHCLNLCLRSNIEHHLALLKFKKACQPYNGWSLLNLFTITVFIYATSLYGLFQKPPLTGVINYAGTFVVEQSHTFLICFSGEEAKQESETLFEVLYDTPWYKYNRDFKRSLHIMLSNTVNPLFVESELLKFSA…	482	6	QQP19764.1 | olfactory receptor 69 [Tropidothorax elegans]	6e-65	31.49	7tm_6	IPR004117: Olfactory receptor, insect	1.682	1.136	0.289	0.732	2.84	3.076
RpedOR18	Rp.scaffold.034	MGSERKKFHYDPLTELKWIMVTSGFGAIGKSALGRKLHKFYASCVIAFFAFILCVTFRAACDLRNNRVQFIIAVHFSLLCVLFIALLLSRLVYDKAHTSASEIAVSGVFRYDSEDSELEAIRSSGLSYIKKMTGFSVAWFIIIVYGCYLTCGVIGLNEIYVACAVQLRIQMEILNYSLATIEKRAFVRLVETEKMSETFDQEKIKSFYQRQDFQNCLYLCLVENIKHHQAIVRPYDTDTFLGFSIAWFIIIVYGCYLTCGVIGLNEIYVACAVQLRIQMEILNYSLATIEKRAFVRLVETEKMPETFDQEKIKSFYQRQDYQNCLYLCLVENIKHHQAIVSFRNLIHPFYGTYLLAVFTLASITLAMAVVSVLESPELASSSDFVKNLIVEMGFIYSLC…	476	7	QQP19780.1 | olfactory receptor 85 [Tropidothorax elegans]	3e-57	30.28	7tm_6	IPR004117: Olfactory receptor, insect	0	3.452	2.345	3.41	6.304	4.53
RpedOR19	Rp.chr1.4141	MSEIFKQFRKLNVQLIVHKKDLWKEVNLRPARGELFLIKVYARKYDMKVDGFHKRKDTYHDFVTEKKWLVMMMGFGDSGSWLYGVYVGLLFGHFIYHIAMNLYGMVLLSGDKILILDALHVLMNSVFTVWGLTTRVIANQALGRIRECIRKGFYVYEDDEEELRDQTRMKEAGVVDIRMRSRDFIYIWTVGGLTTMVFYPMSQVFLVSREQYEKQADLGNPYLPAFFHMPFSTRSTGGLVAAFAIAVIFYTYVVSAAMVMNEIYLSCIMQLRTQLQILNQSIRRINKRAMALYKRLHYPPIACPVELTQNMYFRRCVYSCLRSNVQHHQVLLKFNDEVLKFSGSFLLLMVNVASITFASHLYIIMQNPSLNLSIKCLVMLLVEQTYTFYLCIFGEIIMR…	471	6	QQP19728.1 | olfactory receptor 33 [Tropidothorax elegans]	5e-78	38.11	7tm_6	IPR004117: Olfactory receptor, insect	2.54	1.809	0.889	1.349	3.241	4.101
RpedOR20	Rp.chr4.0994	MTARRSRMEFRRNIVGHHRIDTAGDMPEMTPNTGKMGKDLEKPKGPGHDFFLDRKWLVDLMGCGMSRSPLYVAYIAVIYSYFIYLYAMAAYGMFLAAHEKNLIVAALHVMMNCTFFLWGFTTRMVTNKALNKIRFYINTGFYKYEGENFSEEQIKLRDGVADVIRARSQAFLYTYVAGGLTNALFLPLTQAFKVTQEEYERVVDLANPYLPAFYYMPFSTRSIGGFALAYFITLFIPFLVDGVAIVLNEIYVSCLLQLQIQLRILNLSIRNIHQRACIMYAGLNNTSPIETTLDNIYGNKDYQQCLNRCLKSNIEHHHLLIRYNTELLKYTGSFMLMLCLIASVTFAANIYIVMQNPAWNILTNCFITFLVEQTYVLYQCFYGERIMNESGALFEALYS…	460	6	QQP19760.1 | olfactory receptor 65 [Tropidothorax elegans]	1e-76	35.92	7tm_6	IPR004117: Olfactory receptor, insect	0	2.828	1.326	2.386	3.781	2.278
RpedOR21	Rp.chr4.0996	MNIVIDLLLHLRQPPMCSTDFNVRFIGATIFTQVASSKLRNYTSSTTPAANENPEGIIENVKLIYNIQKMTKQKRDIEFKSYYDFEREKWWITYIFGYAEPQGVLYKIYLGVMYCFFAFILAMTLFGIYKVRDNAKILFLTIHVLMNATFFVWGLTTRLFVGDGIRSIRDSILNGIYKYEDEPPGDYEKMILKEGIAKIRISCAFLVVACVTGGVSNLVYFPISQFFRVSQEEYEEQVDIVNPYYPHSFHTPFSTRSTLGFIGGYALNVIFQFYIYGIGIAMNEIYVGAWLQFTMQLQILNNSIMNVHTRAFKLYLKEINVQSSESFDEKLYDDPLFQKCLYKCLVSNVKHFSKLLRFKKHLVPFCGACLLLIVMIASMTFATLLALIMMSSNLFESIY…	460	5	QQP19728.1 | olfactory receptor 33 [Tropidothorax elegans]	6e-60	32.43	—	IPR004117: Olfactory receptor, insect	0	3.175	0.152	1.381	6.751	6.445
RpedOR22	Rp.chr3.2352	MILPHLVHKLAILSDLFLANRITCSHCAAPRIKAEVMTKEYVNTPSPSVCSNSQTNVDEEITHDFTVENKTALIFTGWIIPKTPLSHFILSVFLLAFQYSLYIFLFITAGYTIYNTLDQKDILIKLINPVTFLILATIWPLIKYSTGKSLNEATKIIRNGIFKYKTEKPFDSYYRMKKTRVFQIRFILRAFTKILSTSAVFNIFLLPFIEWLTLQDSSNFLFNPYLPLPFYMPFNTKTFIGFALAFLPHSIFFIFFYSSILCVEIVATSCAVQLITHIEILNYSLENIENRAIEIYKGMEKNTNGILDENLYRNINFQKCIYYCLRETILHHHAILRFKTAINSYFEALTAVGVGCFSILMASSIFVILENPSKNIPVLIILITEIISYLLVCYIGQVI…	459	5	QQP19727.1 | olfactory receptor 32 [Tropidothorax elegans]	7e-58	33.71	7tm_6	IPR004117: Olfactory receptor, insect	8.829	5.302	3.344	4.459	7.569	5.872
RpedOR23	Rp.chr3.2345	MEYIFYPFIFQAIKNPQAGGRGLSLEEEMERQKNRDNTKGSIHDFFYDRPQLFATVGYLPSGNPVIYAYRAWIFLLLLYLQMMSAYAAYLNKNEKVIMINAVHTFLVPFFGTVGLAARILTYRSLTKSWEMAKSGIYHYNNEDLDEEQVKMKEAILSEVRRKSVITLVMFTTAACWNMICLPLAQLATLVEEDRDHSEDLVNPYLPIVIYTPFSTRNLFGYSAAYMMGVLLFLYVYGGAICTNEIFVSCIVQLKVHMKILNHSIRNIQRRAYLLYRKGNKEAQRDISKENLFITKEFQNCLYSCLKANIQHHQALLRFRKEFQPFGGASLFDLLTVGCIAYASIIYLSFQFQKLPATLLVNYVVTLLAELAYPYCNCLFGEEVIQECTNMFEDLYGMPW…	457	6	QQP19752.1 | olfactory receptor 57 [Tropidothorax elegans]	5e-12	37.04	7tm_6	IPR004117: Olfactory receptor, insect	2.365	2.929	0.611	3.706	5.989	4.03
RpedOR24	Rp.chr4.0342	MTVLRNFCNFLKEYYEEDPLLDEVFAREYYNYPKFSGIYPSSSKRYLALTILQFLIYLTVLALTAFMVGGSMIVFIELNFTLAALNVQVLLIIIYAIFLLVYFNFYRRPMRLLHTEMTYKLFEYEQPNEDIVAEFMRQIRSEKKKLLLLVALSGCAGGNILFVAPILDSAFGEITFNATQYSIDMSLPIPGVVPFPLEPRAAHHFANFLFIVNAFIDVSTVAMVGFLFINMTLYLSTHLKYLSLGIVNVQKRSEVLFAQRYGIIVKGSNKKLFLDERFISCYYYCMKKSYEHYKLILRWTSYLQGIAAWPMGLAYMFGTMVIALNLLSISMGSSLPGTLTASVLLALAEVGFMGVLSFLGQRITDLNEDLRFQMYSTYWYRLPKSNKMGLLIFQEMSFR…	452	4	AXX83060.1 | odorant receptor [Yemma signatus]	4e-94	39.23	7tm_6	IPR004117: Olfactory receptor, insect	0	37.691	32.255	22.795	15.72	8.249
RpedOR25	Rp.chr4.0102	MRSEENMSTKKLTEPAYDFFKEKTWLFLIGGYSQNRGFLYITYILLLFGVLLYLSAMAAYGAYMVSPKKTVIMDAMHVLSITLFSTWGLASRIFTTRSLRQTVAMINEGIFRYSEEESDEEEMKMKCEIPVEIRTKTNVFMSVFSGGLAVNMVLFPLSQLILLDYDDPLRHDPIVNPFLPPTYFFYNPFETRTFFGYCLAYFLVILLLISVYGVNSCMTEIYLTCAAQLKIHSKILNHSLDNLQKRAVKMYLKNNSVDPHQVLLDELFETKQFQQCLYWCFRSNVQHHQALVRFKKACQPYCGSILLDTVTVALVCYAAGLYLILQELPVNYIICHLVLLMTEQTYTFYICYFGEEIVQESSKLFGRLYDMPWFNCSKSFNLTLSIIMGYAIKPFSMKA…	452	5	QQP19760.1 | olfactory receptor 65 [Tropidothorax elegans]	9e-82	35.8	7tm_6	IPR004117: Olfactory receptor, insect	0	4.981	4.476	5.621	4.541	4.174
RpedOR26	Rp.chr3.2353	MAVYTMYLTSGNKLELMRALNSFLLVILTISLRIIRSFAERSVKEGLKLLKGGICAYESDDHGESYGEILNERVALVRIIISTGTKIFLAAAWSNTFIFPLMQWLTVKQGPGSIIINPYLPLHFCMPFNTRSAVGYAAALVINGSFILCMFLSVFAMELSYISFSLQLIAQIDILNFSLEAIERRALAKLKRIYPVKYETVIKKLYKTEEFQKCLYSCLRENIIHHHAILRLKKTIGVYLEAMNGFGIWFFSIIMASTLLLVLQESTTDMIVLMVLETISYFLPNAVGEIIIQKSSKTTFLVYSTQWPQYSGNFKNLMKIMAIYLKEPIVLKATTANVVYRLQTFADNPSKNIPVLIILITEIISYLLVCYIGQAIIDKSSETTHCLYSTPWPQCGENF…	445	7	QQP19727.1 | olfactory receptor 32 [Tropidothorax elegans]	2e-86	41.76	7tm_6	IPR004117: Olfactory receptor, insect	2.428	1.094	0.941	0.952	1.183	2.725
RpedOR27	Rp.chr4.2362	MIENFQWLISPSSELQMNLIKYIKQVKYVDNSVKKTNSFFENGGIYMMLSCLYNVPRFASYFIITAFTIFLNQAAYTIYLSAKMNELDIAAEGLHFAICISWVIVFTFTPQLEKKHYDNIYRTLAEGFFNYNDTLDPETAAKAAEIKDKCFKRKIMWSRRMEVAYNSFAFFCLVVFPILGGKFAKPKVEDMLLRQAPIHGWFPYETKSWVGYIGALATEYIFFFLSLCSLDGTDIPFLCYSEELLYELEVLNLTLRNTVQRAKYIFKKRYACEPNFKPKYDDRFSKCIQECLRDSIRHHYAINGYFFEVNSAYRKILAVVLTSGALLLCMSGIIFYSRIFTIGVKLAFMLYMFGELTHIFAFCYYGQQISEQSANLRNSAYQMDWADYSKSVRPYITMI…	443	10	AXX83055.1 | odorant receptor [Yemma signatus]	2e-92	40.09	7tm_6	IPR004117: Olfactory receptor, insect	0	8.24	12.282	9.558	10.93	9.937
RpedOR28	Rp.chr5.1608	MRGIKESRMADKGKFDRNAGDQKKDKWFIKKNATYLENGGGILNASGMYGGRLIGIANVFWVAAHLTFLMYTIYHSIVIDFDLGLFSGTIHYVLMTTSATSTIVNCQLHKKELEMIICQLENFHDYGNTLDPVSQEEIMKEKTVMKIRKMKVSRYFFVLFVMAGILSMAVFPLIFQTDRTVKDDYIHRNLPVKVWYPIFSTIDVSWPAYIWMLFCEYWIAYIILGGAMGTDIPFACFTEEGTFQMKVLAIGLHNVVRRAKYVFKNSEMGTSKRPKRYQLAACIKQCLNHSVKHHHEIIQFFNHVRNLYYFILLVIMLGSTFLLCLSGLIFVSDEVQTIEKFQFLLYLIVVLFHIFVFNWYGEMVSEVSLQIGEELYEAEWQRYSSEMKQHVLIMQSFLQ…	442	9	AXX83033.1 | odorant receptor [Yemma signatus]	2e-139	46.39	7tm_6	IPR004117: Olfactory receptor, insect	0	6.194	8.364	5.588	5.835	7.114
RpedOR29	Rp.chr1.1251	MGWWSNKFKKELNRPSKEKEGKTNQGDGSIYDFFGERKWLIFLIGFYNTKNGLYQLFRAFLLLGCFFNYCMSIVAANLVSVMDLRVICIHTCILSMYSLWIISTRIMTDKSLNRSRSMILDGIYRYDDEDGEECELRKNAVKLIRKRCKVVATTFGVMATYALLLLPLSQYLTSSENEVDPSNGVLNKYLPYPIYMPFNTRTPLGYAAGMLANAHYVLTAFGNGTIFSQIFVSCTVQLQVHLKILGHSLRNIQKRAYMKYVKSGHEIVGQEVGEDLYKDVIFKKCLYSCLRANVRHHQSLIRFHKEFQPSIGCCFVFSALLGSGSYACILFLILQGPPANVLVIYIATFLGEFVYNHFICTVGQQLLDESSALYESLFSMPWFCCDKRFNRALGIMMCY…	436	5	QQP19768.1 | olfactory receptor 73 [Tropidothorax elegans]	8e-85	35.78	7tm_6	IPR004117: Olfactory receptor, insect	3.187	2.372	1.92	1.78	4.225	4.739
RpedOR30	Rp.chr4.1537	MGLLVSFINKMVDRLMADDDEVVLEEYRRAYGILPLTIGAFWNLKKTSELVITAAIFLLELSIVSFTQVAVGGTIFKSYETSKGYAFTIASYFLIGNGVLSFFFMPHFRRRQLSRIHKLLALKVYVYEVEVDKSDKTKFLITALKKCKNYFVVVPFIMFLGIGSLWILKPQVDEDIINGVNYRLPFPAWFPFSLKEWPPFILAAMLEFAFIVILLVIFSTCMVVFFNVMLNLLIQMHTLIDSIQGVEERARKMMRIPLGYIRGENAQDNADENEFQKEHFNVCLLYCIKENVNHHKILLTFVEDVERLLDLPISVTFVCTTLATAVYLYNFTMNEEEFIGLRVNAGIMGIMHFCTVLFVCLVGQIIQDTSEELREAVYGMKWYNYNFKINQNIRLFQMG…	436	5	AXX83021.1 | odorant receptor [Yemma signatus]	3e-105	42.01	7tm_6	IPR004117: Olfactory receptor, insect	0	10.186	7.679	4.37	0.604	1.03
RpedOR31	Rp.chr4.2584	MFLQEPYIDMLSSIDVADEHDSYYDFNKERIPLMVLSAFLILNRPLVLRYLALILLAIIFAINIVHVVLCIYTISMFTTDKGIILISLLQMILHLLTFTLTFTRFTSTESLDDVLDMLRGGIFIYEAEKKSKDYAAIKVRRVRQIRMLVSFFTKYCFFCALFNTFYNPLVQFLSAEEGKGEEETTDSPFDPYLPLPIYLPFSTDTIFGYSLAFFLEGVFFVFAFSVYICHEELYLSMALQLCAQLELLNYSISNIERRAYDKLVQSKMDVGGGNPLSQLYDKDQYQKCLYFCLRENIIHYQGIIRYFKATGPYLETTNFIIVFVYSLLLATEVLLVLENPSLNLAVSLTLFSDLSGLLQMMYVGQMVINESEQITNVLYSTPWVLCDKKFKTLLNMTIT…	436	5	QQP19757.1 | olfactory receptor 62 [Tropidothorax elegans]	4e-73	36.12	7tm_6	IPR004117: Olfactory receptor, insect	0	5.376	2.003	4.677	6.395	8.336
RpedOR32	Rp.chr4.0006	MANVKRTSRHLEEMEDEIRGKERPFDVFQEFKWWFYIVGFAPKRDSQYVIYMVFLVGLQLFVQAMASYAMHLVPQKSLIFDALHVIIASWFGVGGLFIRIFANRSIMSITERIESGIYSYEGEELDEEQLKIKSTIAGEIKWRSNAIIYVYIVGFTSNTVFFPISQYFMFEDKNGDFPDFLNPYISHVFYSPFNTRTITGYAAIYIIDFYFLLFIYVIAISLNCLYITCTVYVKVHLQLLNYSIKNIQNRAYLMYRKNYGIDHGQMMEEELMAKKEFQKCLYTCLKSNIKHHQTLLSFREDCSSLVGSILLQIFIIVAVVYASTLYQMYQDLPINVILNYSLTSLAEQTYTYFIFVFGQELISESSQIFLSLYSTDWFHYDERFKKSLGIMMVNSKKPL…	436	6	QQP19760.1 | olfactory receptor 65 [Tropidothorax elegans]	1e-68	32.07	7tm_6	IPR004117: Olfactory receptor, insect	0	3.628	1.76	1.295	3.259	2.369
RpedOR33	Rp.chr3.0179	MGLFHNILKFFQEYYEEDPVFDEIMARDYFNMVTVVGIYVPSIKVLPWSIIIVIILITSLCYHATVFTRTVIVLSRLNFTIAAFEFQESILSVLPLLILVSVHFQRTPFREVHTEMVYKFFEYEQPNEDIIAGFKKEIRAEKLRILVFIGITLVVICVQILIIAPILDEAYGDLAFNATEYSIDMELVIPLVYPVQLEGPIQHLIGNSLIAFNVSIASSIIGMCALLFINVSLYLAANLKYLSMGIENLQARSEKLYTQRFGKVIRGTNKKRLYSDPQFINCYEDCLKKTFQHYQQILRWTEMSQVVVSWPLGLAYMSGTLVIALNLISMKLGTSLPGTLYASFWLAITEVGFMAIPSFIGQRITNLSEELRFKIYSSKWYHTTKSIKTGVGIFQAVTM…	435	5	QQP19718.1 | olfactory receptor 23 [Tropidothorax elegans]	3e-97	41.9	7tm_6	IPR004117: Olfactory receptor, insect	7.092	4.612	3.044	1.135	0.484	0.413
RpedOR34	Rp.chr2.1137	MGKFQEMWKEFISESDDRVYEVILKKYYGIFQLAGMYPRLDGWWKYLGVFHIIFFILVIFGHWILMAISIPKLIHINFILFSQMIHYLVLSTVTLVIMAYVFISRAKFAKYHKIINGGVYDYNEDNGEVFTVFHEELLKEWKNSLFIPGFVGVTLCSAVLFGPILDKYGTFNPGDSEDKSIKFNLPVPAYYPYDTSNPYVALITGAGQMITGGIVGLVVCGGGLAYVCLTQTLTRELRILRHAVENLEKRATIMHVRRYGSVPPGKGYAMFQTKSYTKCLYDCYKKVYEHHLAINSIGADVSSMLGFPNLVVFSLGPVTLSMALLGTTVSGSQLPGTAVSALLFSFNEVIYLFLFSYLGQRLTNVSEDFRVSLYDVQWYYCKTNILSNYLLLQMGTLQP…	434	5	AXX83034.1 | odorant receptor [Yemma signatus]	6e-74	35.35	7tm_6	IPR004117: Olfactory receptor, insect	8.803	3.505	2.411	3.252	17.341	11.902
RpedOR35	Rp.chr5.1607	MAIKGKFERNADQKKEKWFLKNNPTYLENAGGILNAAGMYGGRLIGIANVFWVAAHLTFLMYTIYHSIVIDFDLGLFSGTIHYVLMTTSATSIIVNCQLLKKELEMIICQLENFHDYGNTLDPESQEEIMKEKTIMKKRKMEVSRYFFVLFVMAGVLSMAVFPVIFQTDRTVKDDFIHRNLPVKVWYPIFSTIDLSWAAYIWMLFCEYWIAYIILGVAMGTDISFVCFTEEGTFQMKVLAIGLHNVVRRAEYVFNSEMGTCKRPKRYQLAACIKQCLKHSVKHHYEIIQFFKHVRNLYYFILLVIMLGSTFLLCLSGLIFVSVSIHLNQDAVQTIEKFQFLIYLIVVLFHIFVFNWYGEMVSEVSLKIGEELYEAEWLSYSSEMKQYVLIMQSFLQKPI…	434	9	AXX83033.1 | odorant receptor [Yemma signatus]	6e-130	45.87	7tm_6	IPR004117: Olfactory receptor, insect	0	10.656	12.218	9.033	11.582	12.104
RpedOR36	Rp.chr4.2306	MVFQTKPSGEKPTTHDFFNDKTWLLNMMGFRQSRRAAYFMYRGCLLSLMTALSLMAVYAAIVAPNKKLKIDATHYFLLAVHAIWGLVARILTHRSLSQTRKIVTSGIYHYTDEHADEDEIKIKEGIVSEVNRKFNFTLFLCVSGMIMNQLLFPLSQTFFLTEDDYAVKESWMNPYLPHYIYMPFNTRTVLGYCTAYVIDSLGYSCVYFTTLSMCLLYISCEVQLKTHLKLLRHSLARIQERAFMKYKKSRLTVECVANIDKYEIHRNEDFQKCLYSCLKSNVEHHQALIRVMKQVSPFIGSSLLVIFLVVAVIYAAELYLLLQKPSANLMVNYILTFAAESTYAYQVCVFGEEIIEECMFRCEPLYQSLYGVPWFQYGKKFNLSLHIMMSNTYKPMQFK…	433	6	QQP19764.1 | olfactory receptor 69 [Tropidothorax elegans]	6e-78	33.57	7tm_6	IPR004117: Olfactory receptor, insect	0	9.695	7.893	9.778	20.663	18.257
RpedOR37	Rp.chr4.1699	MIIKLLKEYIAYLNSESDKETDAYIDRIYFRSVRIAGLYPNLSYKYLAISVIQILFFLVVLAYHMDFLLRNALFFLDINFILFSQCIHFWMLCLACVIMLLSNVFRKNAFARLHRTMSQKYYDYEEDNASIVKQFKKELFRQKIKLLVVPLLSSGNGVAVMFISRYLDQFGRFDPEKYQINFNLPFPGKYNFPTETGSQGFYYALTGQLLCVLIMLPLIISCAGFIFITITMDFVLQLKILLYSINNIEKRAKDLYFNINGKKIDLPEIDLHQDSGFKYCFIFCLNKCVKHHHILLSAFHGIQDFCGINLLSSYTIGSIMIGISANCIKLDQELPGTQLAMFSLCLNEVFYMAILSLMGQMIIDLSEDIRESFYRINWYHFDRISKLHLRIIRESTLTP…	433	5	AXX83054.1 | odorant receptor [Yemma signatus]	2e-116	44.04	7tm_6	IPR004117: Olfactory receptor, insect	0	23.043	19.975	15.482	11.668	7.78
RpedOR38	Rp.chr4.0587	MNDDDQLVRSRMREERDILYTIYSDYKFVYIIMGYAAITRKQFLLCAGALWSSHIFIISMACYSMYMVLPNISLAFASLHTVTLSTFAQWGLAIIVFGNRDLLEIIEKIKNGIYIYGEDDVEAEKQTIRANVAKALKKKFDQVKLVYVAGFLMNTVLFLLSQYIFFDEEKDNYPMFINPYLVHVFYNPFNSRSTLSNIVTYIIHLLFVLFVYAVALRLLGIFAACAMNMKVHFDILNVSIRNVRERAYKMYLKHYSFKREPTSKENIYKTNDFKKCLFHCLRANIQHHQTLLRFKQDSSFIVGNMFLQVFGLAAIAYATLLYQLYQTLPINVYTNYLATFLAEQAYTFFLCAVGEEVITSSSHVFLSLYSMKWFYFDEVFKQTLLITMINTRVPVEYRA…	432	6	QQP19728.1 | olfactory receptor 33 [Tropidothorax elegans]	7e-44	31.16	7tm_6	IPR004117: Olfactory receptor, insect	0	2.112	1.13	7.841	9.502	19.755
RpedOR39	Rp.chr4.0103	METNSSTKTNNSPSIPIYDFYKENKLVFILGGYSESRKPLYIVYIIFLFISLAYLNSMSAYGAYLVAPNKPVIMDAMHVLAITIFSAWGLASRLCTTRSLRKTSDMINEGIFHYPEEDSEDEVELKSAIPTDIRKKTNVFMIVFCTGLTVNFVIFPITQLILLDYDHPLRHDPIVNPFLPPMYFFYNPFETRSLFGFTCAYLLLILLLISVYAVTTCMSEIFVTCAAQLKMHSKLLNKSISNLQTRALKMFSKNSNLDLQNVSLEELFENTEYQKCLYACFRANIQHHQALLRFIKSCEPYCSSILLDTVTVALVSYASGLYLILQELPPNYIICHSIMLLTDQTYTFYLCYFGEEIIIESSKLFEGLYAIPWYLCSKSFNTTLSIMMSYTKKPFGLKA…	432	6	QQP19760.1 | olfactory receptor 65 [Tropidothorax elegans]	3e-82	35.12	7tm_6	IPR004117: Olfactory receptor, insect	0	4.366	1.292	2.614	3.777	3.743
RpedOR40	Rp.chr2.1996	MNVMTGKENEDSKRGIHDFFNERPYMLAAIGFLPSKSFLINAYRVWIFFIFFYLEAVSGYSIYLNRDEKVTMLNSVHTFLMPSFGITGLIFRLCTHRSLARAIEIVRTGIYEYEPDDFDEEQRKMRENIVPEVKRKTFLVVLIFVVGTVWNMVLFPLSQLLVVEEEDRDHSQDNVNPYLPQVMYTPFSTRNVLGYSAAYLMSVVLFIYVYGVVLSMNEIFVSCIVQLRVHLQILNHSIRNIQKRAFIKYSRGSEIQRETSIDDLYKTQEYQNCLYSCLRANIQHHQALLKFRKEWETFGGATLLAQLTVGCFVNASFIYLSFQFDKLPINLSASYIVTLLAELAFPYCNCFFGEQVIAESTTMFEELYGIPWMYYNKRFNQALAIIMTRSVEPMKIHCL…	430	6	QQP19760.1 | olfactory receptor 65 [Tropidothorax elegans]	1e-77	34.04	7tm_6	IPR004117: Olfactory receptor, insect	28.45	24.476	11.517	7.221	37.696	34.993
RpedOR41	Rp.chr1.4449	METKHKTAKTYIDTPYDIFEENKLLFFIIGFAPIKNVEYWIYVSFMVGLQVFVIVMAFYAMYLVSPQKSLIFDALHVITASLFAIWGLLIRFCANKSLKSIMERIKNGIYKYEEEELDEEQMKMKASIPGEIRKKCNIITFMYCIGFTSNTIIFPLLQFFLYVEEENADHPDFLNPYISHVFYTPFNTRTALGYSLVYAIDFLFLLYIYVTAVSLNHLYIACTVHVKVHLRLLNYSIRNIQRRAYLLYMKNNNVDHGRLLEQDLMDSKEFQKCLYFCLKGNVKHHQILLRFREDCSILVGSILLEVFIIEAIVYASTLYQMYQNLPLNVLLNYCLTSLAEQTYTCFIFTFGEELIGESGKVFSNLYDISWYHYDEKFKRTLGIMLVNTRRAMNFKALIM…	429	6	QQP19728.1 | olfactory receptor 33 [Tropidothorax elegans]	1e-68	35.08	7tm_6	IPR004117: Olfactory receptor, insect	62.969	49.775	28.777	54.773	108.691	93.391
RpedOR42	Rp.chr1.3457	MWWVLKRQSSYDPDVQAGYSKMHMQIITFVGGYPDLVGRYYLSLARCTIYYILLLFCCVALSMSSASALLIMDLPLFSEKIYHCCYLWFYMIGMYNFHLNRDSLDKMLRIIGKGFYKYSTLFTEAERQGIAEDTSFLQKFRKYFSSFIIFSALYMTWVLPLIKVWLTGKLSTVSNSTVPYNTNMPLSMYIPIDTSTPSRYIALYLSEAIFSIYIGLLILSIDLTIVSFIHMLTTQVNVLIRSVNELKERARQTLPNKKDDNPKSAISQVCFYKAFVENIQHHQVLIEYQQALQKLVDLWFLILFVGSGVTIGVSGYLITTMKITSGRSLFGLFMNLMYLTSTMTVMFIYCSFSENLASSSEEFQNALYSTSWPDRDKHLKQNLRLVLYYSQQKDFRLRV…	428	8	QQP19766.1 | olfactory receptor 71 [Tropidothorax elegans]	4e-73	35.39	7tm_6	IPR004117: Olfactory receptor, insect	21.82	14.925	9.452	13.025	26.437	38.304
RpedOR43	Rp.chr4.1089	MARAKPFQQRATTHDFFSDRTWLLTLLGFRQSRKIPYFIYRGCLLTLMTSLTLLAIYAAILVPNKKLRIEATHYCLLAWHAIWGLVARILTHKSLNQTKKIVQAGIYNYSDEEEDEVETNIKKGILGEVRWKFNFFLILCLSGIASNQLLFPLSQFFFVTEDDFVIDDNWMNPYLPHFLYMPFNTRSFLGYCTAHLLDSLCYFCLYMTTLSMCFIYISCEVQVKTHLQVLRHSLKNIQTRAFLKYKKSENCMRNLANMDEDELFKNKEFQSCLYSCLKSNVEHHQALIRMMKQIQPFIGSSLLVIFLVVAIIYAAELYLMFQKPRLNLMINYVLTFAAESTYAYQVCVFGEEIIQESERLYQSLYSIPWFRFGKEFNRTLHVMMSNTLKPMQFRSLLLG…	428	8	QQP19764.1 | olfactory receptor 69 [Tropidothorax elegans]	1e-81	32.78	7tm_6	IPR004117: Olfactory receptor, insect	0	41.539	27.148	27.936	89.66	68.729
RpedOR44	Rp.chr4.2530	MSSSGVSERSKLDELEKAASYDVFKQNRWLWGLVGFTSTINTKYFLYVSFFMTVHLYIQAMAFYAIYLLTPNVSMILGSLHSITISLFAEWGIGIKFFGNKDLMRITEKIRSGIYNYEGEDLDEENIRLKTAIPGEIERKFNATLYAYAVGFISNTVFFPLSQYISMKGDYPDFINPYMTHLFYNPFNSPDSIGYFAMFVLYLFFLLFIYIVCIRLTGLYATCAINLKVHFKLLNHSIATIQKRAYSLYVKNSRVKVPQESLMEDKDFHKYLYQCLKANIKHHQALLRFREDCKFFVGSIILEVFVLAAIIYASLLYQLYQPLPFNVQLNWACTNVAAQTYSFFICLLGEELISESDLTCTSLYNTNWIHYDESFKKSMGIMMVYSQRPADFRALLMNV…	427	6	QQP19768.1 | olfactory receptor 73 [Tropidothorax elegans]	2e-58	31.13	7tm_6	IPR004117: Olfactory receptor, insect	0	3.562	1.307	3.966	5.053	3.366
RpedOR45	Rp.chr4.0880	MIKNDAKKQSERYHDFLLDRKWIITAMGFSDSRSFVYRLYIASVYAFFLFLVAMAILGMAFVFPDKENFIGAFRVLNNSVFTLWTLSTRLLTDKALAKLRVVIKSGFYLYQGEEEHQKEHMKIKESVVEEVRTKSTIFIYIGAVGVIANVVYFPISQVIVTTDEEYNKVVDVANPYLPVYFYLPFTTRTPIGLSAAIFINLLLFFYIVLACIVANEIYLSCVIQLQAQLRILNYSIRCIEKRALLMYRKLKNVNCHVSRQDFIYDDLFYQGCIHKCLRSNVKHHHALMRFKHELLKFSGAMLLIIVIIAAITFATDLYIIMQNPPINFFIKAAATLFVEQAYTFYLCFFGEDMMKESGDLYESLYSVNWFYFDKNVNRTLQIFMCFVRKPFRVKTLILD…	427	5	QQP19760.1 | olfactory receptor 65 [Tropidothorax elegans]	8e-83	35.94	7tm_6	IPR004117: Olfactory receptor, insect	0	0.142	0	2.314	3.328	0.842
RpedOR46	Rp.chr4.0097	MAPANDKPERKTTKENELHDFFYDRPFLFNLVGYGPSTGPLYIARRVTWYALNIVWQYMAWYALYLSAPKKDLMISALHFQLISSFGLWGLSTRLLTYRSLSKARDMIRSGLYTYVGEDVDDEEEMLRGGISNEIRRRSNFSLLVYIIGASTNMILFPISQIFMLSEEPEEEFVNPYLPHFYYVPFSTRNFLGYTAAYLLDVLILVYVYGLAICMNETYLSCVVHLKTHLKILNHSINNIERRAFNMYLRSNYSPPGLTPDDLMDNTEFQSCLYSCLKANVKHHQTLIVFKKQCTPAVGSYILDTMILATLIYATVLYLIMLNPPLNIAVNDIITLLAEQTYTFCLCVFGEEIIEQSTILFENLYNMSWMNYNQKFKQTLHIMMSNTIKPLKMQALLLD…	427	6	QQP19760.1 | olfactory receptor 65 [Tropidothorax elegans]	4e-81	37.29	7tm_6	IPR004117: Olfactory receptor, insect	0	8.406	3.267	2.644	8.997	8.731
RpedOR47	Rp.chr3.2288	MPLKKSETVFCGFHDFFNDRRCLIATIGFSPSKNPAIYVYRTWIFFMFFYLQSMSAYAIYLSRNEKVTMINAVHTFLVPSFGVCGLSARLLTHRSLKNTWEMVIAGIYQYTNEELDEEQMKMKERIGSEVRKKSVITIAIFTAGAAWNMICFPLSQLATVVEDDQDHSHDLVNPYLPLVIFTPFSTRTFLGYSTTYLMGLLLFFYAYGVAICMNEIFVSCIVQLKVHLQVLNHSIKNIQRRACQMYKSVHEIPHRDLAKEDFFITNEFQNCLYMCLRSNIQHHQALLRFKKEWQTFGGATLLALMTVGCFVYASFIYLSFQALPVTLIANYIVTLFVELAYPYCTCLFGQDVMEESSTLFEELYSTPWMYCNKRFNKALTIIMTRSLEPIQISALVLRA…	426	6	QQP19760.1 | olfactory receptor 65 [Tropidothorax elegans]	3e-76	36.06	7tm_6	IPR004117: Olfactory receptor, insect	3.623	1.714	1.31	1.491	4.2	3.796
RpedOR48	Rp.chr1.4135	MLTTDEGVREDSIFSTQQRLMQVTLMWPIRCRGHTVVLVHIYFWTITVCLSICTLALTAKSFNTSDLVDRSEAIDILTLVSTALFKMVYFSSHHVDMKFLVDFADTKFLKRPPVGKTDLLMKRWMRWCGPLSALHCIIAFTCISFWGVCPILNVLFGVVPLSKMNLPMNVWYPFDFTSNFLFIPFYIIHYFGLISSTHIYMSCDGFFFSMIHLVNGQIEIIKSTLKEIKNVIPKDNETVAEAKYSLLKSCIIHHNNIIMFLRKLDMEFRTMILFDVLHAIISLSFAMFQTSESKGFLEYVKMFCFVCYCFLHQYLNSLFGQSLINQQESLREAMYQIDWANERQDLKKSLQIMMCGSIRPIRFSAWSMYYLQYETFLEASTYGDIFPSRNAPNSVQRLM…	426	6	QQP19746.1 | olfactory receptor 51 [Tropidothorax elegans]	4e-146	55.79	7tm_6	IPR004117: Olfactory receptor, insect	4.439	6.283	1.637	2.319	7.412	6.537
RpedOR49	Rp.chr1.4285	MGNNDWLKGKRLYHDFMRERGWLVTAMGFGESRSPAYMVYMAAIFLYFIYHMAMTVYGILMAWEEKILLVDGLHMIMITVFTLWGLATRVLTDRALAKIRAYISSGFYLYEGEELLEEQVRMREGVVEEVRAKSRSFIGVWFLGGLTIGVFFPLSQMFLVTDEEYERIVHVANPYLPAFFYMPFDTRSLAGLGVAFAMALLYFTYAVGATIIMNEIYMSSIMQLRVQLKILNYSIRNIEKRANNLYAKSRDLHRKDMSISDFLQDSHYNKCLYRCLQANVQHHQTLIRFNEEVLKFSGSFLLLMFNVASMAFASNLFIIMQNPSLNISIKCLVTLLAEQTYTLYLCVFGEIIMEESGSLFESLYSVPWFFYNKDFNRTLQLFMCYTMKPMRVKSLLLDL…	426	5	QQP19760.1 | olfactory receptor 65 [Tropidothorax elegans]	3e-78	34.28	7tm_6	IPR004117: Olfactory receptor, insect	8.425	4.427	3.766	9.441	11.736	8.54
RpedOR50	Rp.chr4.0686	MATERENGDKETQFDIFQENKWLFFIVGFAPIRNVEYMLYVIFMVIIQLFVQAMAFYAMYLVSSQKSLIFDALHVVTASWFGVWGLIIRFVANRSLLSIAQNIKSGIYNYEGEELDAEQLKMKAAIPAEIRWKSNAIVFMYAIGFSSNTIFFPLSQYFMFDEKRGYNPDFLNPYISHVFYTPFNTRTVLGYAAIYVIDFVFILFIYVIAVSLNRLYITCTVCVKVHLQILNHSIKNIQRRAYLLYLKKNNVQGDRTSAQELMSNREFHDCLYFCLRSNVRHHQTLLRFKHECSTLVGSILLEVFILVAFIYATTLYEMYQSLPPNVLVNYLLTSLAEQTYTYFICTFGEELIGESGNVFLNLYGIEWYHYDERFKQTLDIMMVNSRKPIDFKAIIMNVP…	426	6	QQP19760.1 | olfactory receptor 65 [Tropidothorax elegans]	4e-83	33.97	7tm_6	IPR004117: Olfactory receptor, insect	0	4.922	1.612	1.359	6.488	5.105
RpedOR51	Rp.chr4.0458	MATEKTRENDETPFDLFKENKWLFLIVGFAPIRNMEYLLYIGFLVAMQLFVQAMAFYAMYLLTSHKSLIFDALHVVMAACFGVWGIGIRFFANSGILRTVERIKSGVYHYEEEELDAEQIKMKGGIQEEIRWKCNAIVYMYILGFTSNALFLPLSQYFLYDENTSYHPDFLNPYVSHVFYIPFNSRTIIGYIAAYFIDSFFWLVVYVISVSLNRLYITCNVYVKVHLKMLNHSIKNIQRRAYLLYLRNKNVNAGRISEQDLLRSQDFQDCLYCCLKANIKHHQTLLRFRDDCSALVGSILFEVMIIVAIIYASTLYQMYQKLPVNILLNYIFTSMAEQTYTYFLCTFGEELIEESGNVYLNLYGIDWYHYDEKFKQTLGIMMVNSRKPIDFRALILNVP…	426	6	QQP19760.1 | olfactory receptor 65 [Tropidothorax elegans]	3e-82	33.73	7tm_6	IPR004117: Olfactory receptor, insect	0	31.275	12.607	12.92	34.591	22.563
RpedOR52	Rp.chr3.2407	MVHLPRFMTNSSSKNEKDKDSSVYDFISMKRTQMILSGFLIVDKTVFHLVLNVLWLCTLYVLCPYLFVTGVITVNTIPLEKGTKVELLQDMALLLAIPSLSINALRQRDNLNLVIKTLKTGVYLYDDDNESISEVKRKYIDQFVRMTSIVYKLISAFAISKVVFPLILNLTTSNESSAKGPLNPYLPLQLYTPFDTRTTGGFLLAFVSQVMFLFFLDIVFTCHVETYVSCAIQFTAQYEVLNFSLRNIERRAQLKLMKQSFSPSEVFDFNTPEYQTCLLSCLRENIKHHHAILRFRKIVRLYIESASTLAVTFFSLLVAGAATPLLQDPTADVALIILLFLLFFGYLTMCWVGQMITDKSSETKDSLYSTPWPQCGKLFRTLLCTMMVNTQKPVVLRAR…	425	5	QQP19757.1 | olfactory receptor 62 [Tropidothorax elegans]	6e-76	36.25	7tm_6	IPR004117: Olfactory receptor, insect	10.26	9.447	4.103	8.966	13.25	11.942
RpedOR53	Rp.chr1.1244	MTDQARLGEIHDFLRVPKWELFFSGFTVMKRGTWRYYTYNLYRFIVVLQLVMVISMGFTAAVLCADDLVLSLQCVHTALVDVELSLNLMIRFCPQYRVLFRTLEILKAGVHKYDEDVLNGEYKEIQRKYLLEIRQSTNLFRVLLVLAFISNAIIVPIMNFIFVDVDASKEVVNPYLPSFFFYFPFNTATVIGYTVAYSFIAFAYFTIVAPIVLSIDSLYVSCTSQLKAQFHILNYSLQHLEKRAYSDFMKIETSEKKKRLIDNLYNSKEFLNSLRICFRSNIIHHQNIIELKKSFEAFTGVTLLLIIGLMSSILAINVIVILQKPNIYVVTNSIMVLICELYFVMHYCRFGEDVIGISSETYDVLYATPWYNCDGAFKKYLSIVISNTRKPVVLKTALL…	425	5	QQP19780.1 | olfactory receptor 85 [Tropidothorax elegans]	9e-79	35.07	7tm_6	IPR004117: Olfactory receptor, insect	19.068	9.447	7.221	30.881	32.319	30.965
RpedOR54	Rp.chr4.2456	MTAKANKVSKVIKHDCLAERKWLTLVSGFQDSSSAFYTIYRLIIQLATVYMSVITVYACLIEPSKPFIVRATHSLVLDAYYIFWFLTMRLVLFRSLKKMSSFLQSGVYQYEDEEEDEELMRMKKAMPKEIRRKSNIFVCMFYFAGITMTTLFPLSQLAFVDPEQVSGSELNPFLPHLYYQPFDTTTFTGTVLGWCMGVAIYFFMLTIECTVNWYYISGVVQMKIHFRILNYSITNIQRRALSMYTKKRNLPYGISSEQLLQDRDFQNCLYLSFRSNIEHHQALLRFRDLFEPFSGSFTLWIFTLAPIVFGCMLYLLSLYQHNPVNVTVTLLMTFAAEQFTVIFICFLGEDVYTESEQLFHRLYSIDWFAYNKKFNQILHIMMSNTRKPTGVRALVFGVP…	425	7	QQP19760.1 | olfactory receptor 65 [Tropidothorax elegans]	3e-66	32.78	7tm_6	IPR004117: Olfactory receptor, insect	0	16.318	6.893	11.124	19.936	23.567
RpedOR55	Rp.chr4.1984	MKTNQLRENEKADFFQNRRWLVLIAGYGTSRNPLYIAYIVLLFLILFYILVMAIFAFCLVIPDKVLMVSACHIGLIAAFVIFIMSSRIITRKSLVETNEIIVSGIYDYEDEDIDKTQLDMKRRIKDEIKKTSDFFSILFATGGLSNLTVFPLTQLIFLSEADDDENSIYNPYLPPFFIYMPFNTRTLGGYCLAYFINIILAIVLYGITLTWLDIYIHCTVMLKAHLKMLRYSIKNIHNRAYSKCKPAADSKQTEPTMDELFEQKYFQNALYSCIRSNIQHHQALLRFRNALQPFLGAGMLDMYLLVALIYAACLYLILQNLPVHYVVTLVVMLVAEQSNLMIMCILGEAVSQESERLFETLYDIPWMYCNKSFNKAIDIMMCYCRDPLKIKAVLLDKPA…	425	6	QQP19768.1 | olfactory receptor 73 [Tropidothorax elegans]	6e-60	32.15	7tm_6	IPR004117: Olfactory receptor, insect	0	11.95	8.599	13.123	21.445	24.778
RpedOR56	Rp.chr5.1068	MENREREVIPGTTHDFFNDRKWVSFLAGFAVSENTAYLIYRAFIFIVFTYMILMSILACVYKPEKQLMVTAAHADLLNIFVMWTLATRVLTYRSIQDTRDKIKSGVFRYEEEEQDEDLMKLKLSIPSEIRERANIFFAICILGALTNGILFPASQMLLLDPEVVKESRIVYPYLPHLFYQPYDMRTNLGFFLGFLVGFLNIIILYAVAVCTCWIYISYAVQMKVHFRVLNYSIENIQKRASLMYSRNVGKPLNDFLPKKTFMSTDEFERCLYLCLRSNIQHHQELLRFMKMFQPYYGSYLLSLFTLASSVFGALLYLINLVPPINILLLLVVSFVAEQFSVVYVCILGEDLMTESQKVFTMLCNTSWFNYGKKFNRILQIMMSNTMKPMGLKSLLLGMP…	425	6	QQP19760.1 | olfactory receptor 65 [Tropidothorax elegans]	1e-69	35.68	7tm_6	IPR004117: Olfactory receptor, insect	0	4.151	1.805	2.989	5.696	9.194
RpedOR57	Rp.chr2.1709	MENKSVQSSIRPADPFEETNLLNKFVCYGFSKATSYVIYQIVTIMFFIFINCLVAYTLYVVSSDKILTAGVLHTVADSVWLLWTLASRYATERSLMEMKKMINAGIYIYELEDLDDEQYIVLKGIAQEIRNKSNRYVIICFIGTFFGMFVFPLAEYLTSGDGPPEEHLVNPFLPHPCYYPFSTDTILGFTTAYLIDVVYWTYVYVLAYISNGLLIYSTVHLRAHLYVLNYSIMNIHKRAYKLFIKKNYDQKCEASMDELMQKEEFRYCLRKCLNANIEHHHAILRFKNVCQPYNGLSLLNMITVVVALYAALLYLLLQDLPMLARIKCAGTFLVEQNYSFLICNFGQEVSTESSSLFGSLYSITWINYDKDFKKTLHIAMSNSMKPMEIKAYLLDFSAT…	424	6	QQP19760.1 | olfactory receptor 65 [Tropidothorax elegans]	3e-62	35.24	7tm_6	IPR004117: Olfactory receptor, insect	6.553	6.743	3.783	3.495	7.695	7.415
RpedOR58	Rp.chr1.1249	MIQDEVNKDSVHDFYSEEIWVFFAGYKVFHRNEKGFVPYLIYRVVMFVFLMYLVGVAIIGAVVSNGDHAETIQAIHIGLLGMVSFFGLFSRLVDYELLNKTVQLIRAGVFKYEDELADDVHEIIKRKHVNEIRSMKKIFTKLLIFVATSNTVLVPLIQLILIKEDTSDKILNPYLPQPIYMPFNTRSYLGYAAGMVINVLFMCCLVPLVICMDTTYMSCMLQLKAQFAILNYSLRNLEKRAYMSVIKKHNFLRDNPIENLYRSWEFQNCLYRCLKSNIKHHLALLELKNTFQHYLGFIFLIVVSLASFILAAHVILILENPGIFIMVNFIATLLCEMLYTLHYCWYGEEVTSESSKVYESLYSTPWYNCDVRFRKLLIMMICNTRKPTTVRTVGFNITA…	423	5	QQP19780.1 | olfactory receptor 85 [Tropidothorax elegans]	9e-147	48.81	7tm_6	IPR004117: Olfactory receptor, insect	1.186	1.438	0	0.5	1.493	1.593
RpedOR59	Rp.chr1.1246	MGGEKIVDEGLIHNFLTEQKWVFLLSGFATFKREDPKYMIYNLYRLFAMTHLTYIMSMAFTAAVLCIDDIVLALQCVHIGLILLEILLNQATRLTPQFRRLHKTMEILQAGVFIYNEDLLSEEHKEIKRKYVDEIRNTTWMFRKLIITVSISNMIFVPIMNFFIIDVDASELVVNPYLPSFPLYIPFNTTTYVGYACAYLLLVSTYLLLVVPILFTMDAIYVSCTVQLKAQFHILNHSLRHLEKRAYSEFLRITKSEKIECFTDNLYSSWEFLSSVRKCLRSNIKHHQILIELKKSFDEFTGLTLFLIISLTSVILAANVLVMLEKPQLYVSANAFLMVLCELYYVLHYCRYGEDIIEISSETYDVLYSTPWYNCDTTIKKYLSIAIANTRKPIILKTV…	423	4	QQP19780.1 | olfactory receptor 85 [Tropidothorax elegans]	1e-94	36.7	7tm_6	IPR004117: Olfactory receptor, insect	9.032	7.047	3.957	7.34	14.556	18.369
RpedOR60	Rp.chr4.2110	MFVIDIGAACSIFGSGRHALLSLIDDVSYSYDYNSKIVYKYITQAERERRKTINIILKYSVRAGSYSLINIVIASFLEKHLTGSRHLLLFPCWFPFDLDYVVFNISAYLLQFVGITVATLTAFGALALVYIIYEHISAELNLLEYCLEKTFERAEELVKSKKEGNMTMKEACILCVRHCGAHHVEILKYFDDANSICKYLYLYVFGSGLGMCTMSGFALISDNTALKFKFVSLTLLQLIVLYILCWCGEAISTKGDGLREAIYGLAWYDLPKECHSIFYIMLERTKKPLIFDTAIGMKANLDSYTSLSSWKSPNFLYNQLQFFWCNDFVTSISPSETSSLTKMCLVFSFFIPLSFPGFCACLMTASLSLQSSGILLNLVMPESSLFSQISSLAASLAAT…	423	6	AXX83035.1 | odorant receptor [Yemma signatus]	1e-67	39.22	7tm_6	IPR004117: Olfactory receptor, insect	0	0.144	0.165	0	0.249	20.599
RpedOR61	Rp.chr4.0973	MDDQQETSAYFDAVHDFINERSVLKIVGCCKVLNKSRPQFSFNIIFMIWMLIVCLYMLTMLVYTLSLPNTGPELKVKIFQVLSVMIVAFVVPMINLYYRNNYIAAVEFLKKGFDKYLNEKPDPEHMKFKRQRVRQVRLWSFIFCVLSYLVAIFHVIQPVFKYIFVNIDEENSYESINPYLPLPLHTLFNTKNSIGFTLAFLSNVIYLFLLYTILVCLIEIFLSSTLQFLAQIEILNYSLLNIQSRAWSKCYFDAGFSNHPLNPEEEQELQKSLYLCLRSSVQHHQAILRYHNEVKDYIGAMNTFCLIVFAFLFATAVVPVIKNPLRNMALIFQMMTELTGYFQLFLVGQIIADKSVYTINMLYSTPWIQCNKNYKTMLNIMLTIAKKPIVLRAPFLNAD…	423	5	QQP19727.1 | olfactory receptor 32 [Tropidothorax elegans]	1e-70	34.09	7tm_6	IPR004117: Olfactory receptor, insect	0	17.546	10.882	19.183	25.878	29.624
RpedOR62	Rp.chr2.2160	MSWRQKFQAFWERYNAESDDAVFEIIKNKYFYLFQIAAMYPKLDGFWAYFSFFQLVTYVFLIAYHWIFIVISLPKMVGINFVLFSQLIHYLVLATLTIAILVYASSVRYIFARFHKVIHVALYNYNEDDGEIFNRFNNEMNEEWKKLLFIPVVVAITAGLVLVGGPLLDNYGTFDPEESNDPSISFNVPVPMWYPFDTNVQWVGMLMSLSQLVSGGIVGLSVATGGLSYVCVTQTVTREFRILLFAVDNIEDRANTLHIKRYGHKPAGNGRDTYQSAAFNDCLNTCYKKLYEHHLAIINLADDMTAILGFPNLIAFGGGPLIIGMALLATTTSGGQLPGTTLTALVLCLIEIIYMFLFSSLGQRVTDLSIDFRMKLYNAKWYYCRKSILTNYSILQVVT…	423	4	AXX83034.1 | odorant receptor [Yemma signatus]	1e-86	35.85	—	IPR004117: Olfactory receptor, insect	6.295	6.472	5.111	8.841	10.948	7.857
RpedOR63	Rp.chr1.4492	MGDGFHDYQDTLDGETRRQVEDVVNKSVKHKNFLINTFCYMFVTTYALVVLLKPSIKYFRGDYLLGTPDDGMLRVMPVEVWMPGDKFSLWTNISMFLFQLHAATMGAAVAIAHHVFFLAVCEACAAQFQVVGMTFKHVGRRAASMKLPKDEALRKCMAHSIKHYRTISSANDNDNATPTATANDTATANASANDNATAIANDNATATANASANDNDNATATAIANDTATATANASANDNDNATAAAIANDTATANDNATATANDNATATATTTATATATANANATATANATTTATTTATDTATATLTASANATATANASANDNDNATATATATINSYATATTSATATATASYQLNSENIRDDLYGGDWTKNMIVLKNYVLIMQSKTKEGLQIRAGGYVP…	423	5	KAE8573956.1 | Odorant receptor 144 [Halyomorpha halys]	1e-31	36.09	—	IPR004117: Olfactory receptor, insect	0.274	0.575	0.33	0.5	0.871	0.743
RpedOR64	Rp.chr1.4274	MKSANRSEDLKIGIYNHNNKWIQLVSGYGESRTPIYVGYIVFVLVVNVCTLVLGVWAEVLVVPDKILIVLAAHIIFSVIFCCNLTICRLLSDRSLKETNRMIMSGIFDYENEEIDENQSNMKKEIDAEIRKTCDLVVIVFGSGAVSNLIVFPLTQLMLHDGSYQEGILNPYLPPFFIYLPFETRTVFGYCLAYLIIAMTVIILYCQVISFMLVYIQTAIHLKGQLQILNYSMKQLHSRANSKLKRLKLNSHYSQGLLLQKEDLQSCIYSCFKDNIKHHQTLLRFKACMQPFNGACLLDCYVMIALIYASLFYIILQNVPVGFLINFFEMLLTEQSSLFLICFIGEKITEEHEKLFETVYDLKWVGCSKKVTNGFRIMMSNTIQPFYLKALLIDSTAALK…	422	6	QQP19760.1 | olfactory receptor 65 [Tropidothorax elegans]	3e-54	31.42	7tm_6	IPR004117: Olfactory receptor, insect	3.749	1.153	2.314	8.528	7.482	7.769
RpedOR65	Rp.chr1.4273	MKSANINEGEKIGIYNHNNKWIQLVSGYGESRTPIYVGYIVFVLVVNVCTLILAIWALVLVIVDKILIVLAAHVVFTTIFCGNLTIGRLLTDSSLKETDSMIMSGIFDYEDEEIDENQSNMKKEIDAEIKKTCDLVVIGFGSGAVSNFIVFPLTQLMLHDGSYQEGILNPYLPPLFFYLPFETRTAFGYCLAYFIIGLSGIIMYCQVISFLIVYIQTATHLRGQLQILNYSMKQLHIRANSKLKRLKLNRNYTQELILENEDFQSCIYSCFKDNIKHHQTLLRYKACMQPFNGACLLGCYVMIALIFASLFYIILQKMAVGFLINFLEMLFTEQSALFLICFIGEKITEEHEKLFETVYDLKWVGCSKKVTNGFRIMMSNTIQPFYLKALLIDSTAALK…	422	6	QQP19760.1 | olfactory receptor 65 [Tropidothorax elegans]	5e-49	30.79	7tm_6	IPR004117: Olfactory receptor, insect	15.911	13.118	7.107	27.756	49.882	64.178
RpedOR66	Rp.chr3.0658	MEGSERKEAHKEDLFKRRSWLISIAAFGESTTAAIVAYRMFIFMVLFYIFSMAICAIYFAAPNKVLMASACHVLLISIFVILITSFRLVTNSSMKETNKMIKSGVYEYEDEDVDENLLNMKTRIEEEISKTSNFFSAMFATGGISNLTIYPWTARLFESDQEEDSILNPYLPPYLIYMPFNTRSLGGFSLAYFINVILVLYLYGITLCWLDIYIHCAVVLKVQFKMLNYSLQNIQTRAYYKFKQAGRNSAKEHSSDMLFEEKYFQTCLYSCFRSNVRHHQALIRFKRALQPFIGLGLLDMYLMAALIYATTLYLIVQDLPLMQLINLIMMLFTEQSKLFIMCLLGEAITDESGGLYETLYNLPWIQCNKSFNKAVNIMRCNTLEPFKLNATLIDKPANI…	422	6	QQP19760.1 | olfactory receptor 65 [Tropidothorax elegans]	1e-66	33.89	7tm_6	IPR004117: Olfactory receptor, insect	32.737	18.452	8.594	20.399	20.327	21.605
RpedOR67	Rp.chr1.4279	MKSSTKNDIKIGLFNHNNSWITKLAGHGESRHPLYILYIFFVLLLHVYLLIFAAWAVVIVVPDKILSVLAAHIIFAAIFCGYLVVSRFVTARSMREANRMILSGIFDYEDEEIDEHQSNMKKEIDEEIRKICDLVAFVFGSGAVWNVIVFPLTQLVFHDGSYEGTILNPYLPPFFFYIPFDTRTPIGYCLAYLIVAVSTTMLYSECITSLIMYIQSSLYLKGQLQILNYSMENLLSRAYSKFKKMEQKEEYSQEVLLQNEDFRNCVYSCFRDNVRHHQTLLRYRAYIQPFNGACLLDCYVVVALIYGSLFYMILQSPPLGFLINFIEMLLTEQSTVFLMCYTGERITEEHGRLFDTLYSLEWIGCSKKVTNGFRIMMSNTVKPLYIQALLLECPASLKS…	421	6	QQP19728.1 | olfactory receptor 33 [Tropidothorax elegans]	3e-51	32.04	7tm_6	IPR004117: Olfactory receptor, insect	0.183	0.433	1.325	8.715	12.625	12.269
RpedOR68	Rp.chr2.2500	MTLDGHISDHHLVEGLSVRLLKTMWLWKIINYYREEKKIFWHLYMGIGITFLLIVSFVSFQVACLMFVPVGLKEGSLLILNPLTSIQSLTKFAVFCFCIEEQCDLMDLCRRDFLSSISDENQQMIRSIYRRYAQKCNLFCRIACGVNGGCVVIWNVLPIIRSRMTENALNIKMQSEGEINKILGGWYPVPYSESPWYEIVYVYEFLACSWCGFIISQYEVLVITLVMMLATHFKVLTHCIRQVSILTADNNISGTGSRNHSYNSAHDQLELYIKDHQRLLKTGDKLKSLYNILITMQLGIGLLVQTISIFHFIFGQQNYVFTFKFLVYLTYQVTEIVLYCYCGTFLQTASTEVAFALYETDWYRLDKKYRYACQMGMIRAEYPVSLIAVRLYPVNNTTL…	420	5	AXX83065.1 | odorant receptor [Yemma signatus]	4e-160	56.93	7tm_6	IPR004117: Olfactory receptor, insect	4.686	3.331	1.993	2.52	3.258	3.101
RpedOR69	Rp.chr5.2077	MPASGTTHDFYNDRKWITFIAGFAVSNNRIYIMYRAFIFFIFSYMIVMSTMACFYKPEKQLIVTAAHSILLNIFGIWALTTRILTYRDIQITRTTIRAGVYRYEDEERDKELMKLKESIPNEIHKKANIFLAIYILGALTNGILFPASQILLLDPESLKDSRIVHPYHPQLFYQPYDMRTRFGFLFGFLFGFVYFSILYAVAVGTNWMYISYAVQMKIHLRVLNYSIKNIQKRASLIYTRNVGKPTDDLATNKGYTSRTQEFERCLFLCLRSNIQHHQALLSFMKMFQPYYGSYILDLFTVASSVFGALLYLINQIPPINILLLLVVSFVAEQFSVIYVCMLGEEVITESQKVFTMLYDISWFNYGKRFNKILHTMMSNSRKPMGLKTLLFGIPASLEI…	420	6	QQP19768.1 | olfactory receptor 73 [Tropidothorax elegans]	5e-67	33.9	7tm_6	IPR004117: Olfactory receptor, insect	0	5.649	3.155	5.712	6.891	5.561
RpedOR70	Rp.chr3.2412	MAGDNTVSRDIYGEIYYDFMKQRPVVLVIGGYGISRRSTAHFVVNVIGLIWKALMYLYVLVAGVITIVYKAQNKTEMVQTFYFMGLIFVSIGFHLARVMANDSLGEAMAMIRNGVYRYDDGMGDEYRALKEKRMKTLKFFVAFITSGMYFCALNFVVIIPLVQLSVHTEEITEDDLNPFLPMPFYVPFSTLTASGFCTVYVLSALTLYTMYVSYVCHEEIFLVCMFQMTLQLDILNTSLRNMERRAYFKMMKKVPFGEDSKSMIGLYDNPDFQACLYTCLRENIEHHLTILRFKKAISPYIEGTTTVVVLIFSSLVASAIIIMMENTTPQLSLITDLFGFLPMCYVGQLIADRSNEVKNAIFDSPWTSCNEKIKVLAKVFMSNTQQPIMMRVKGLNFKL…	419	5	QQP19757.1 | olfactory receptor 62 [Tropidothorax elegans]	2e-139	47.17	7tm_6	IPR004117: Olfactory receptor, insect	16.885	16.963	8.826	12.864	34.54	34.777
RpedOR71	Rp.chr2.3190	MDAETDEDIEKFMRTKYYYLLHLAGMFPYLKGYWALFALTQWFVIGVLMLFHWITLIVTIYTMYEINFVLFSEAVHNFTVLTLCITLFFFINYERRRIARFHGYICHGFYDYQEDNESVLNLYHKEMLEEWSKLLVLPFVLLFGAILVFLIAPTLDQYGTFNVEDIEDKTLIQTPIPMWYPFRTDSQFMKYATILAQLCTGFFVACIVGASGVGFTSLTQYILKELKILRYSNVNVEARARHIYMKQYGRSPSEPDYEDKAFVKCFADCFVKLHFHHKVILKAADDLGRVLGAPMLVVIYGGGLLIALAGLTIHAGAQLPGKCFASVVEIVLETSYMLLICYFGQRITNQSEMFRDDMYATRWYRYSKAIKVSMGIMQINTVIPIEFSLYGMTPANLNT…	418	5	AXX83034.1 | odorant receptor [Yemma signatus]	4e-74	35.7	7tm_6	IPR004117: Olfactory receptor, insect	22.71	22.121	16.185	19.244	20.899	12.142
RpedOR72	Rp.chr4.0948	MNESENVLEGIMYRSGFDNSLSKIVALRGPLKFRYEGKWYRIWYLIYTVWVEFVTFINFLTVGLRFFSPGVDVVERCFTGFPFFSLSLGFFRVVYLFLFRNRFAKLIMEYNNLYKDDPSIQEEIANNARVIRKIPRMLALLTAAPMAPWCFMPILNAMRGQKWALSVPSVWPFDPFQNIFTFATVTVLQSFAAGYTTLRVVLFDNMFYCYACRQLALTRHLNRELSRILSSAQAKDDGEIYYLDNYGNVITKYLAAENLRRELRAWVIQHQHSLRLTKELEALYSPSLLYQYAMISINLCTTAFVVVFSDSDLLNVILCFLYVIGNSLELLITCGFGDLITQESNNFERAVEGTYVHTLRSEYMSWLKMILIRVRVPNRISPLGVFHLNVETFKNIMVT…	415	8	QQP19717.1 | olfactory receptor 22 [Tropidothorax elegans]	0	69.88	7tm_6	IPR004117: Olfactory receptor, insect	0	1.759	1.513	1.53	1.775	2.381
RpedOR73	Rp.chr3.2454	MTFEMLQFCTIIQYGIGSGLPLPPGPNNSRSKTMLFYFTFIAVFLAYKLLCTSYAIVAIEEFEVRVYLLSALMFFFSGLFLLLFFALCGDRFEQLIHQVDQLTQRLANSGLGNEDLLGHRYQAAASKITVYANVMAVLSFICPSCFCISVPILDYMNGSYRTRTAVPAQCPIELVIQKIPGVFEAIVIQQCLAYVVPCFQRFITECIMLGLFKLQANYFAYLSMALDDLGKCMKTAEKNAKRRKLNLWIKLHQDVISNAHDLSSFFSPVIVMYYFSTIVTVAGSLLYMMDTKSSNIMQTLFGGGYMTMALFQLYLQCHAADDISTEAQKIIFSAYSLPWADLGRKYRSSIRFIIATAERPVFVEGYRSPAFRLDKVSYQANKIEPLEFLANELSRPIGF…	411	8	QQP19705.1 | olfactory receptor 10 [Tropidothorax elegans]	2e-108	49.3	7tm_6	IPR004117: Olfactory receptor, insect	3.568	1.184	0.848	1.202	1.408	2.185
RpedOR74	Rp.chr1.4282	MRFSTKNGEKIGLYNHNNRWIQIIAGHGESRSPLYILYIFFVLLVHVYLFIFAFWALVLVVPDKILSVLAAHIIFAAIFCANLTASRLFSERSLKETNRMIISGIFDYEDEEIDDNQSNMKKEIDAEIRKTCDMIAFIFGSGAISNLIVFPLTQLILHDGSYQEGILNPFLPPFFFYLPFETRTPSGYCLAYLIVSVCTTILYSVCITSLIMYIQSSLHLKGQLQILNYSMEKLLSRAYSKFKNMELKKKYSQEVLLQNEDFRNCIYSCFRDNVRHHQTLLRYRACIQPFNGACLLDCYVVVALIYGSLFYMILQSPPLGFLINFIEMLLTEQSTVFFMCYLGERITEEHGRLLETLYSLEWIGFSKKVTNGLRIMMSNTTKPLYIQALLLECPASLKS…	411	6	QQP19760.1 | olfactory receptor 65 [Tropidothorax elegans]	8e-48	31.09	7tm_6	IPR004117: Olfactory receptor, insect	14.458	11.988	5.26	30.729	51.086	71.246
RpedOR75	Rp.chr5.1259	MKLNLKQKCINIWGETFINNYGIYMVLCGFYNSPWYILLYNIALISCYTYMILHTLYYTVFVDREIAIAAEAGHFTVIVIIIIIFLVVYLLSKGRFDRAFSALKEVDFEYNDTIDPETSLEINNLYAEMRRRKVIIHRVLAAAFWSTGIASAFLLPISSGRFSAIEKDDPVNRRAPVIKSTPFDSKYSTIGWSMSIFLDVLAMTCVVMVVNAVDILFICFAEEGCNQLEILTLGVKRLFKRARYVHEKRYGYPEISTRDKSFCLCIKECLNDSIKHHIATTGYFRIVTKAYSWPVLVVILSGAFLLCMSGIIFVSKNFGIEMKMAFMFYLAAELAHTFIFAYYGEYMSQMSVGLRDVLYSTQWEDSIKTLKPYLFMMQANCNKSTISLSALGFIVYNFD…	411	9	AXX83055.1 | odorant receptor [Yemma signatus]	2e-72	36.25	7tm_6	IPR004117: Olfactory receptor, insect	0	9.028	8.484	11.33	16.26	19.56
RpedOR76	Rp.chr3.2466	MAVPIHCSFENGSSGVYEIFMFFQFVGLSLPALQKLDNEYLMFALIRVQSAIFKYLSECMKDIASEMPLMNKHKAKEKLLKLAMIHQESLKIIEKFQSLFSSVVVVYYLSMICISTCGIFYQINMDKLAIELYCIPWYLLDSEGRGFVRLMINIANRPKTLMAYRAPSFSVNREAFLADRTIAEGVGMLQMTSISLTIIFSICIGRLEDLIEHIDLTTEKIQKSLLGGERFFVSTYQNDSNKFQALNKIMCSSSIVCPFFYTLSTPLTEYFAGTYGSNMALPIYYSFEKGTSGLYEIFMFLQADGTNIIQRCCLGSYMLLSIFQFFILCHLIDELSEDMDKLAIELYCIPWHLLDSEGRGFVRLMINIANRPKTLMAYRAPSFSVNREAFLAFVVNLVS…	411	8	QQP19710.1 | olfactory receptor 15 [Tropidothorax elegans]	5e-28	35.5	7tm_6	IPR004117: Olfactory receptor, insect	4.694	2.96	1.867	2.575	4.609	3.715
RpedOR77	Rp.chr4.0060	MELPWKRRRLTDIWHWPHIFWLNIFGFWSEDASTPTARRWLARLRAVVLIHVGLMSASMMVAIGEKFATGDIMTNMFTVFASGPGIVGMFKIVHIIIHQKELKSAMTGLDGMLKEVDCPEAEAIMRDGLNKCWKVFTISLTSGSCITFHWLSRPLLLAAFYQDRTRIVDTWPAFIDSWAKFALSYAFQCPGVICLGHAFYIFDNIYFCIAQCILSHLDILKYKLEHLKLEGREKKSAGLVSCVKYHTNILRQVVSVNGNSNFVQKVRHAGVCKKLRDASSSVILWQCINTVIMSCSGVFIITMSEVNANVLMNLGEIMLVITISLYFYCWYSNEITLQCEELMKSVYMSDWADATASSKKALHIMMARTIPPVYFGGILEIRLNTFTSVLKTTFSYYNF…	410	6	QQP19777.1 | olfactory receptor 82 [Tropidothorax elegans]	0	63.95	7tm_6	IPR004117: Olfactory receptor, insect	0	6.083	7.314	24.437	16.557	19.279
RpedOR78	Rp.chr3.2451	MSSPRFFNAYRTIIGYGRKSGLPIPWEKKGKFYVLIFIYDLLCAIYLFCKVLCNLFAVQDTDEFALQIFLVGIVLLLMTGVFLFFYYMIFGKELLSIVNDLDTMSQRITEGDLGKHDVFLEEYSSSASRLTKFSNLMAVNTYFCAIVYCVWGPFMDLIYGMYRRNPWAVPAQCEAEKVLQKYPWLFEVLVFQEVLNYLIPGFQKYVTDCIIVALLKTQALHFTYLSYCLKNITKEWAPSERGISKFYDWLRLYQDVLTNYNRLISLLSPILVIYTMGTIAMIASVMISHIQAKLMSAIQMMIGAFYMVQLMLQLYLMSNVAEEVTGAAEDIAFDMYSVPWYDYNIKDKGFITLTINVANRPIFVEAYKTPSFRVNRETFLKLFMSTVSAYLGLKKLLEI…	409	8	AXX83024.1 | odorant receptor [Yemma signatus]	2e-76	32.35	7tm_6	IPR004117: Olfactory receptor, insect	7.642	4.908	2.558	6.728	8.363	11.749
RpedOR79	Rp.chr4.0360	MNTFRNFFREYYKRDPVTEDVLMRDYYNVIYLTGMYPSSSKKYLPLSILQLVLYFSTLLYHGVILFGTILVFARLNFTIAVFQIQEFLLIVYSLFALGLLNVYREPFKILHREMAYEFFEYEQKNEEAIASYKKEMKAEKLKLLGIVVMCGLAGANILLVAPIVDSAFGHVEFNASQYNIDMDLPVPLKYPISLDNPVVRLVVNIFIVFTAFVVVSSIAMVFFLFINIAIYLIINLKYLSTSIKTIEDRSKVLYTQRYGSITANRNRRDLYSDKDFMLCYEYCMKKNFQHHQLILRWAEQLQIVAAWPMGFAYTFGTLVIALNLLSIKTGTSLPGTLFASLQLTVIESEDLRLKLYSTKWYSTKRSDNLNLMVFQEVTLRPLKLSGFGLVTANLDTFAN…	409	4	AXX83060.1 | odorant receptor [Yemma signatus]	5e-85	39.04	7tm_6	IPR004117: Olfactory receptor, insect	0	10.262	9.378	8.97	10.421	2.635
RpedOR80	Rp.chr3.2485	MKLMREKEGPGSKEPLLHFYDFLAEKKWFMLCSGLAITERSTFWTNLNKLYVCCIVTFLCYNMTLTGGAVLLSLDDKVALTVAVHFFLLTVLLISVISIRIFCNSSHKAASEIIRQGIYQYEYEGPEITEVRKNGVVYIRKMNKLITISVIAGIATTFIVNPIARLMVSDEESWRKTINPNLPIPVYIPFGADTTSGFCIAWVILVIYAWYLMSGMISLNDIYVSCVIQLRIQLEILNYSIETIEKRALMKLVNNVSTSYDTARLDKLYEISDFQKYLYLCLIEDIKHHQAIVSFRNLIQTFFGFYLLAVFMLASITLAMGVIVLLENPEITSLTDFVRNMSGKIPESLFATPWIHCNKRYTAMMTIMMTNTLQPMTLTSRIFPVVASLESYGNIVSTM…	409	5	QQP19780.1 | olfactory receptor 85 [Tropidothorax elegans]	6e-35	30.47	7tm_6	IPR004117: Olfactory receptor, insect	0.566	2.082	1.705	4.313	3.216	2.965
RpedOR81	Rp.chr4.1393	MVPEKRNEGIKVDLFNHNNKWVQVIAGCGDSRSRLYVSYIIFVLFIDVYSLSAALWAAYLVTPHKVLTVLAFHAVFSATYCTLLTLSKLFSERTLKETNRMIISEIYNYENEEIDENQSNMKKEIDAEIRKACDLVAIVFGSGFISNMILFPLIQLMIHDGSYEDTILNPYLPPFFFYFPFNTRNVRGYCLAYMILIVCVGILYCQVISAILFFITCAFHLKGQLEILNYSIKNLHCRAISKLKSTMIIKDNSHEFSIEKEDFQTCVYSCFRNNVGHHHSLLRFLGYMEPYTGACLMDCYIMIALIYASLFYMILQKLPPGFLLNFIEMLLSEQSALFLVCYLGERITEEHGKLLENIYGLDWVRNNKKVTDGFRIMMTYTIRPMYLKSLLINMSASLK…	407	5	QQP19728.1 | olfactory receptor 33 [Tropidothorax elegans]	1e-32	33.04	7tm_6	IPR004117: Olfactory receptor, insect	0	2.391	2.399	10.401	8.275	19.31
RpedOR82	Rp.chr3.2455	MPSLRFYTSLRTLFIHARRCGVPFAAEGETTITKLRTCFDMFVACFLTYKICCCWLSLLVIEEFEVRLYVFSIIAYFFTGLFIIFFFLMTKDRFASLVERIDELTDSLIRSGFGQEDLLIKNYQEAASQITLFAKVMGTVSVVCPCAFCMSVPFFDYLDGRYRYRTAVPGQCPMEFVIQKIPGVFELVVLQQVMGFFFPSSLRYVIEGIMLGFFKIQSSHFLYLSATLDDIGKRMKGDQCGNGDFLKWIKLHQQVITNAYDLTAFFSPVIVMYYFSTIIAVAGPLIYMLDTKSTNFLQTFFGAMAMITALCQLYLQCHAANEITTEGENIAFPVYNLPWTEYGRKTRDFISLIINMANRPIHVDGYRCPVFRLNRITYQALFLNTVSTFMAFRKIQELN…	407	8	AXX83024.1 | odorant receptor [Yemma signatus]	4e-101	38.73	7tm_6	IPR004117: Olfactory receptor, insect	4.93	2.541	0.685	1.213	3.232	1.655
RpedOR83	Rp.chr3.2452	MTPLRFYDYHRAILIYGRGSGLYLPWNRKENFPRLILFYSIVNAIYLAYKLYCTVYGVMDNEELEVKLFLVGGIIYFFYGLSPCIFFFLFRGKFGKIIDFSDAINDKIQEANLGEYEESFVNVYKSKAELLRKFAEFMAFSTVSTGIVFCVQVPVFDYMDGHYRERVSVPNQCAFQKKILGTPGVYEFIIVEQSIALLIPGFHKFVVDCLMLGLLRISALYFTYLSASLKTVQREMISGERSSKVFIKWLKIHQDALTIFHQLAELFSPIVIVYSLTNIALITCAMLYQFEAKNTNIFQAVAGGGYMALIMFELFLHGLVADEVTTAAEKVAFDVYSLPWYDMDVKTKGFIRLSITLANHPLRIDGYKAPSFKISREAFLELFVSAISAYIGLRQLREL…	406	8	AXX83024.1 | odorant receptor [Yemma signatus]	5e-102	37.65	7tm_6	IPR004117: Olfactory receptor, insect	57.879	47.794	28.858	69.859	51.584	36.835
RpedOR84	Rp.chr2.1335	MALTTRNYIKKDSILYVQIHILKLVLMWPLHTSSLIKSFLIYMYSLVITVALCVSTVALFSKAVKTTDLVDRSEAIDILTLTSSAFYKFVFFAYNHDFFRDFVDLIDQKFPLQPLVGNQNFTMRGWMKWASTLSIVHCCIGFSAITYWGLCPIFNLILGITSLADMPLPMNVWYPFDYNHGFQYFALYLLHLFGLISSAHIYMACDAFLFSLIYFICGQIENTKASLMGIEDVKAKGYESIDEAKHKGFKKCVEHHVKILYFLKQLDVVFRSMICADVLHAIISLSFAMFQMSEAKGVLEQIKMVIFVGYCFVHQYLNSLFGQLLINQQESLMIDVYGVNWPERSISFQRSVHIMMGGGCIKPVKLSAWRMYFLQYETFVEFVRSMVSFFMVLRTLMDQ…	406	6	QQP19743.1 | olfactory receptor 48 [Tropidothorax elegans]	0	67.74	7tm_6	IPR004117: Olfactory receptor, insect	10.169	10.637	4.981	9.21	9.202	8.628
RpedOR85	Rp.chr2.3444	MILTENDFNEDCLLYYVLYLMKVTLLWPICKGSVLKNVLVRVYFCALCFSLGLSSLALFAKIINTTDLVDRSEAIDIFTLAACALFKLIFFASKHGEIRKLVWRMENDFPQRPYIDDDDVLDMRGWMRWCCPLTAIHASMGLVVSTFWCSCPILNYLFQMTTLQQIPLPLNVWYPFDYSHGPIYYILYAIHYFAFAVGAHIHLVCDGFVFSIIYFIIGQIQILKESLKGIDKIIREDSESTELAKVDALKKCIQHHSNTLTLLRDLDLMLRTLLGTDVMHAIISLSFSMFTTSEAKGVLEQMKMVTFLSYCIFHQFLQSTFGQLLINQQESLLTAVYEVNWSSSCVAFRKLISTTMGGGCRITIKLSAWTVYYLQSETFVEFLRSMVSFFMVLRTLQEK…	405	6	QQP19743.1 | olfactory receptor 48 [Tropidothorax elegans]	6e-117	48.76	7tm_6	IPR004117: Olfactory receptor, insect	5.431	4.656	1.894	2.613	4.807	6.321
RpedOR86	Rp.chr3.2450	MQFNLKRNILIIGRRNGLPLPWLGKESWPVLMVFYEVLVLIYLLYKISCTYYAILLSKELEMKIYLLGASMFFVFGIYPCIFFAKNGSRLRKLIENVDSMNERIMTGALGREEHFADLYKRTSGFLNNLNKGMAVATVGCAAFYCTSVPVIDFMNGHYGERPAVPTQCPLDLAILKVPGGFESIVIEQVIAYTIPGFHKYVTDYVLIALLRIHAAYFNYLSTCIEDIGRDMVAKGKATQKFLVWMKLHQDALMNYHELASVFSSLVIMYCLCTIVLVAGTLMFQMEAKNSNILQTIFGGGYMSMAMVQLLMVCNAADEASTQSENVAFQIYNVPWYDLDDETKHYIRLVIKIANYPIYLDGYRAPAFRLNREAFLALFVNTISAYMGFRKIREISSLEG…	403	8	AXX83024.1 | odorant receptor [Yemma signatus]	6e-121	43.88	7tm_6	IPR004117: Olfactory receptor, insect	2.202	2.264	0.173	2.976	3.787	2.452
RpedOR87	Rp.chr4.2112	MIKLIVDVVSLVCSLTELMEVGKELNPAGKAPGLNLRKKSLKANGEEDEVSRERFVYALAIFRVISDKQQYPDSKFPDFFQEWKWYFDNANSILKYVYLLIFGTGMGMCTISGFGIISDNTTLKVKFISITFIQLIALYILCWCGEAISAKGDGIREAIYGLAWYDLPKECHSVFYIMLERTKKPLIFDTAIGMKADLESYMSVNTVNSNRIHTPNFLISSRIRDDDLKQLKPPFHTNDRNVSYSHDYNSNIVYIYIAQAERERRKIINTFLKYSVRAGSYSLINIVIASFLEKHLTGSRHLLLFPCWFPFDLDYVVFNISAYLLQFFVITVATLTVFGALALVFIIYDHVVAELNLLEYCLEKTFERAEELVKSKKEGNLTMREACILCVRHCGAHHA…	403	8	AXX83035.1 | odorant receptor [Yemma signatus]	1e-67	39.22	7tm_6	IPR004117: Olfactory receptor, insect	0	1.207	2.769	1.751	4.701	5.572
RpedOR88	Rp.chr1.0342	MERCLWKLFGHINPTSFHMADQESIDDFHNFLIEPKWELLFCGFTIMKGGSGRYYMYNVYRCIVALQLLILISMGFTAAVLTADDLALSLQCAHTAIVDFELLLNQGTRFTPMFRRLFRTAEILKSGVYTYKEDVLNGEYMEIKRKYIVEIRKTTSMFRIMLIFVFFSSAVIIPIMNYIIIDVDVSEEIINPYLPSFSIYYPFKTTTFVGYTCAYIFISVAYLTVVLPIIVTMNSIYVSCTLQLKAQYHILNHSLKHIETRAYSDFLRIETSEKKRFLSGDLYYSKEFLNSLKTCFRSNIIHHQNLIELKKSFDGFAGVTLFLIIALISLILAVNVLIILQSSETYDILYSTPWYNCDNTFKKYLSIAISNTRKPVTFKATLIELPASMDTFGMVRISS…	403	4	QQP19780.1 | olfactory receptor 85 [Tropidothorax elegans]	2e-53	32.17	7tm_6	IPR004117: Olfactory receptor, insect	3.064	3.019	2.769	5.952	4.701	5.795
RpedOR89	Rp.chr3.2419	MDVEIFHDFSSERRMMLVFGGYAVMNKSTFKFILNIIMVVCVLGLYVFLIVMSIFSIIVLNELEMVIEGVHTLGYLLIGVLLPAIRLLANSGLTEAVKFIRCGIYCYEVNVPDDVEYEIKKTRVEQVRLISSVFTKLSVLTVISNVFAMPLINLLTITDDANMILNPYLPLPVYMPFNTKSNVGYTVAFLCCGLFMCVLYTSASCYAQTYISCSLQLVAELEILSYSLRNIDKRAYYLMSKSKYSNVGEASLTDFYQTQDFRRCVYFCLKENIIHHQRIMQFKEAQRVFVEGTNTIGLMFSSIITAAAVVSFLENPGINAAVIISCLVSLFSYFLMCYLGELITTKSLEILNALYSTPWYQYGRDFNLLLNVGFTLAQKPIIMRTSILDISSSLDTFAR…	403	5	QQP19727.1 | olfactory receptor 32 [Tropidothorax elegans]	7e-88	39.06	7tm_6	IPR004117: Olfactory receptor, insect	4.117	2.868	2.423	3.676	2.35	3.789
RpedOR90	Rp.chr3.2461	MRRFVDFVFNGLRTVLVVGRSSGLPLPRDGPVSYSQRIGDTCYQIFIALFVTSRLICASYAISQTDKIEDIIFGAATLMFTLTGASLTLFYAVYGKGFKALTDNMDSLCRLISESGLGREEFFRKLYQADAKRLSTFTNIMTISTITSPVFSCFSVPVSGLIQGNYGEKMTLPTHCPFELNSPRLYEFFIILEFFSLVYPAIQKLGNEFIMLGLFKMQAAYFKYLAVALKELDAENIAGAQKKLVKWIKIHQAVISNAVELVAFFSPVVVLYYVSIICIVAGGVFYQLNASDANVFTSWFLGLYMVITVIHLYVQCHMADELTEEAENLSTVAYSIPWFILDTKSKDFIRLIINMSNRPIRVVAFKAVSFTMNKESFVAFMTNTISAYMGFSKIVEING…	402	8	QQP19710.1 | olfactory receptor 15 [Tropidothorax elegans]	8e-162	57.93	7tm_6	IPR004117: Olfactory receptor, insect	1.056	0	0.173	0.351	1.571	1.117
RpedOR91	Rp.scaffold.184	MAEDIGAETIHDFLTERRILTYFSGFLKSPSILYNFYRLCIVVLLLYMVCMSGLNCFLDPTKQKMVEALHFILIALFITYWCLAMWIKVFGTLEETCDFLKEGVYRYRDESSDPVIMKMKMEMSGEIRRKSNIFVYMFVCGGLTNTTVFPLSQLIRLGPYQRSVITSPYFPHLFYQPFDMDSPLGIVLCFTLGIAMYFFIYTISCAINWYYISGVVQMKIHFRVLNYSITNLHRRAVQLYEERHGNALKGTDLTSDLQFQQCVYDSFRANVQHHQALLRLRNMFEPFSGSFALSVFSLSSMVYGCQLYLLYQVIHGGCIYRPKHVAKHIWRMSATSSAFGLQVNPINVTVNLFLAFAAEQFTVIFICFLGEDVLQEENTGLIKRLDCIALNSKGLLQKI…	402	4	QQP19738.1 | olfactory receptor 43 [Tropidothorax elegans]	5e-40	32.03	—	—	0	0	0	0	0.393	1.005
RpedOR92	Rp.chr2.3092	MWREVLPKAGGDRARYIEDLLKWGGLWLDFSHRSLGPLLSLLQIFRLLYLLSGLLYLFNDLFVLGLPFLLTPSAVFMPLGICVFSTSVIFLLGIKGLKRLMLVGEMDLMSYTEPWERRIIEEDSKSVQKLADLFRYTVSLFAFVYMLLPLLVDLVRASLGYPKPYLVPSPFNTYLEQLPQRDYRFYVGVLGADLWFAIGISNTIAFQCTLFYGISYATTQIKIVKEHIKHLMGEEKGRYSSVPKEWALRDILRNHQRIIRLNGLQRKCITLPYLIQGLVSTVSITFIMYLIDQLFGKDNLVLILALIFIVIMLVIMFIMCFAGEYLEQQGSELFYRICNLPWYTQPPHSRKQLMMLIMESSRPLLLDYNRSSSLSYRAFLQMVNSAFSYFMLMKSFSQL	399	5	QQP19701.1 | olfactory receptor 6 [Tropidothorax elegans]	6e-129	53.45	7tm_6	IPR004117: Olfactory receptor, insect	18.857	10.976	7.515	7.78	11.078	9.004
RpedOR93	Rp.chr4.2052	MKYVIFRSRAELVTEIMEEFGNFESTTNRECIGRKWDPEKEDVMELEGDVTDESLVKACVKEHNRLLNVKKQMDSLYGSIILAQLTYSFIDTCFTLFCVTQYENFMEALSELLPQFFALFLEIFLYCWGGEMIHGHFEDLRNAIYRCEWHNCNMKVRSSLLIMESFTTKSVNITAAIFYFNFSFYETICKETFSYYTVMTQFLSAKMFILKNTYKLIGLTSIEKKELLNKKKYMNIPKGSQVSDESLLKLCVKEHILILKIVEKFSLIQNRLFLPQCFNAFTSICVALFLVSQSDNMVREALKVTPWTTLIFLQLFVSCFAGELIKQKCHDFYTSSYCNGWYNCSPEVKSSLLVVQAYTSRPTVMKGAYVFELCLHTYEVAVREVFSTFTVLYQLFNTK	399	11	QQP19773.1 | olfactory receptor 78 [Tropidothorax elegans]	1e-88	62.77	7tm_6	IPR004117: Olfactory receptor, insect	0	23.019	13.807	31.12	40.354	30.501
RpedOR94	Rp.chr4.0129	MSAVKPHANIKAVEEETTYNFLTERKLLKLFTAYYVYKSPLRRDILYSAYVAMVVLFMFLFTASSLVAVYLSLGDTIETIHTLHLFILNICILAGLFLKHVCNKQLSEFVEILEQGVYRYDGEPVDQHHIQMRRKCANRIRHTCISFGRFLYFSGVCNILYVSGSQLFLNTEDSTSKPINPYLPEPFYLPFDTRTTHGFGIALFLNVLHMLYLCSIFIVMDEIYMSCAVQLTGQFEILNDSIKKIEKRAVLKLAQTEGMILSESSMSELYLTQKFHKCLNDCIRANIQHHHEIMKLMNKFNWYGGASILILELSASLAMAMQVVLILKSRKTYNILFWTPWAHCSKEFKQLLIIMMLYTENPVKINTVKFGISASLETFGSIISSMYQIVNVARGFNE	398	4	AXX83011.1 | odorant receptor [Yemma signatus]	1e-91	39.37	7tm_6	IPR004117: Olfactory receptor, insect	0	0.458	0.876	0.532	3.437	4.288
RpedOR95	Rp.chr5.1655	MVALKDDSFGIDSKYFKAIGLWQYVVSHKITWYVILNFVLGSVFILDTSFQFLMTLTSKFELSSFVEKLSVNLTITESAVKIVYYYLHRSKLHSLSSAFKNDLLHCSRHNELKTSGIMSNSKSVVNRITKGFVIMIFSTVGIWNALPILRCFLIHDCTDWHILPFWYPESFLSSPIFIYIHEFFIMVFCAALLYNVNCFFSALALSLSFQFELLSKCLKSIVRNASRKGSPDVHTMDILLRDCLIDHQRLLELAKEMEEMYNPLFLIQMIASTFTICLVLVQLNIHFSSNELPIAMTMKFFMYLLFGSVELLVYSWGGQILYNQAEEMHGSLYESGWNEGSQQFKKNIAIAMTRTMSPVYLSAGKFYRVDLSSFTQIIKASYSYFTFLHGSDSSSHN	397	5	XP_014289200.1 | odorant receptor 82a-like [Halyomorpha halys]	6e-174	62.27	7tm_6	IPR004117: Olfactory receptor, insect	0	7.048	3.689	7.108	17.23	15.949
RpedOR96	Rp.chr2.3332	MILRIKYTKPLRSILKEGGIWLEFSGHRYGGLLKLGQIVRFFYLLAVYFMLLYKLFEQGLAFLLTPSAVFIPLGGVLLTLTAIMMLKFDKMEYLVDQYELSFAAYKRKWEKEMIRAQFEKFEMFINFGKSFCRSFALLYLLLPLFIDGIRAVMGYSRPYSLPTPLEGYLDNSSRNAYFYLIIVASDVWLWIAMSTSIGMECVIFFIVSYSTTQIKILKQWLNKLHPDYQPDSLTAEIDRLPPWDLKQIIKYHQQIIRLNNLERACIGLPYVTQNVSVTLSLCFIMFLIRQLIGQNTLMLLLTVTFIFMMVGLVFVVCFAGELLQDESEELFQTLYNIPWYRQSPNVRKVILLMMTKAANPLVLDYKSSTISLPAFKEVMNNSYSCFMLMNSLSPS	395	5	AXX83066.1 | odorant receptor [Yemma signatus]	1e-132	50.77	7tm_6	IPR004117: Olfactory receptor, insect	4.2	3.85	1.765	2.5	1.998	2.046
RpedOR97	Rp.chr4.0340	MCVFRNFLSFLKEYYEDDKLTDVVMARDYFHLARVAGVYPSSSIKYLPLSVIQFLLYMATLCYHSVILIRTMIDLMNLNFTLAAFEFQELLLVLYSIFVLVLFNTHRTTIRSVHNEMFYKFFEYEQPNEDIIAGFKKEMIYEKLRLLIFISVAAAAGGLQIVYITPYLDETYGELTFNVTEYSIDMDLVVPLRYPVKLEGPIPHLIANFLILFNTYVVVVVVGFAIFIFVNMSLYLSINLKYLSMGIENIQGRSEMLYTQRYGRPKKKNLYSDRDYLRCYEDCLKKTYLHYQLILRWTRKVQIIASWPLGFGYTLGTLVIAMNLLSINTGTSLPGTLLTSIWLAIAEVGFMAILSVLGQRVTDLVRFRNLGVCLKYNSIKLCTGNSNLSRIQFL	394	3	AXX83060.1 | odorant receptor [Yemma signatus]	1e-68	40.75	—	—	0	7.41	4.425	3.76	3.072	2.166
RpedOR98	Rp.chr3.2406	MVVLESTGFNVIVTLPLLVAQFCFQQICKLGQIITDKSAQIKDSLYSTPWYVGDKKFKILLLIMIINVQKPIVLQAAGLKKDVSLATFGDFERLPRVALFDCGQMSGQIHERIDTNIIHDFNTERLILKILAGYTVLTKPFWVFVLNMTLVICILLLYLYLWVMGVYTLEFTGNSGAIKVQTFQTLCLIFVAIFAPCIKLINNGSLQEALVLMKKSFEQYDDDGCGEERKKIIMRRIGHIRTITFSYAAMCYACAFANTVQSPIVQMLSPKEEESPDSVNLLLPLPLCMAFSSRTQYGYAVAFTSNALFLFLFYTSVICITESYMSYGLQIIAQLETMNHSLRNIERRAIYKLKSDETIKEESKEMLYDQQEFQRNLYLCLKANIEHHHAILK	393	4	QQP19727.1 | olfactory receptor 32 [Tropidothorax elegans]	6e-39	35.71	7tm_6	IPR004117: Olfactory receptor, insect	2.847	0.929	0.177	0.539	2.142	3.428
RpedOR99	Rp.chr1.3842	MLSYVRICGFPIPWLESSGIKKVFWTIYNVLVFAFCIYIIVCSAYSRAFKTSFQDLCCLGIVWSQMTNGILITIHIIAFQSDMKAVVWKIDSITDRIQKSTLGHQDFFEKNYIRHRNIITLFTKGVIYMNVGASILYVLPPPVIDYFLGTYRKHIPIPLIHIGIPDDQSFFFEFIIIQQVLVLLYSSIKKIGNDCIFLSLFNLQSSFLKYLSVTIQNLGQEIIQEGGSDKEGKLSRWISLHQDILSVTHDLVSLYAPIIVLYYTNLICIMALGLFLSLKGDQVDTFQCIAIAVWISIQIFVLFLQSAVADELKETSHKVGVEVYFIPWYEMKKEIGKKIPLILMLANHPVHLTAYRAVSFILNKETFLGFITSIITVYMGFSKIEEKVDKGIE	393	7	AXX83047.1 | odorant receptor [Yemma signatus]	1e-137	56.48	7tm_6	IPR004117: Olfactory receptor, insect	2.847	1.702	0.532	0.718	1.473	1.714
RpedOR100	Rp.chr1.1255	MEAVEEVKKETVYNFLTEKKLLMILSGHYLYRSPLRRYQLNLAYIGIIGVFMVAFVSSAVVAVYVSLGDTVSTVYTFHLLLLNTFIMGGLICKTICDKLLSEFVESVERGVYTYAGEPEDEDHIKIKKTGVEQIRFMIMTFTKFLFFSAVSNTLYVSGSQWLLITEDTSMRPLNPYLPQPFYFPFDTRTPVGFGIAFFIIIIYMFYLCSICIVMDEIYLSCSVQLKNQFEILNDSIAKMEKRAILKLAQTENIKITEASINDLYMTEKFQKCLYDCLRANVQHHHEILSLMKKFDWYAGACLQMIAIMASIILAMQVVLILESKKTFNVLFWIPWANCSKQFKQLLIIMMINTKKPVQIKTVGFGITASLETLGSIITTMYQVMNIAMGNKK	392	4	AXX83011.1 | odorant receptor [Yemma signatus]	1e-90	42.69	7tm_6	IPR004117: Olfactory receptor, insect	14.272	14.74	10.14	14.578	15.973	21.766
RpedOR101	Rp.chr4.1431	MFLVEIFKIDSFPWFLEVAGIWSNPNRGKWVPLIRFLAYVCFFIEVVQIYSMSYGGFTKRTLQEEGFFTMIFLITTIHNLYFQWNQTLVNRIIRMVDQFQKDHVHDWEHNIFNERSAAAWKLVNSYTKFIIGFCAVYSYAPITIDFIAGNIIESFPVIRGPIPLQGFVNVAGSRTFQGLLWTILSQVWSFFQCLAHIGGEWSLYLAINYTKIEMEIISKKISIMKQQMSENKDLNYMKGLKNIANHHQKVVKILDDMIELFGFPVALQNTIISVCFCVNLFSMTTMENQDDFLPALQNTCTFVTIMGIVYFVCKTGQSLETQNNKMFSDLYDLPWYEQGPAFRKDLNMIIRQTRMPFVIHYHRKSPLLLETFMEIVNTSYSYFMVLKSAV	390	5	AXX83021.1 | odorant receptor [Yemma signatus]	3e-105	42.01	7tm_6	IPR004117: Olfactory receptor, insect	0	6.862	5.006	3.799	5.936	5.412
RpedOR102	Rp.chr1.4397	MKDMRDEPIMKKVKDLEPTVKEVRDPLMLMENILQWIGVLPVDPDNIPKYYYAMVVWQHLMYVNCYLATVIYACADHPFFDKMESIQCILSLFHMVSKYINLHYNPGPYRKLVTTARRMWEEAKTRPEHWQLLDEISKETELSIKVIVLMFAAAVPSACLTTLLYNMQVESEKRETLYMVWSPAPDESWYWTACTYQGVFMFSGLNTLAVTLSAVYSHCLLANGYMKILSKMLTTNPVDMRSCAILHVNVLQYVAEIKDYFAGQLFLELFFSSLQNACRAYMCLKMVNESDPKAVGAICILILCLSGPFIDCLCGHVLTAGSENVLSSSYQSAWYDAPKRDRSSLSILMTMSTKIIRLEYKGLLDFSMERYSMVTQATYSYITLLKGAD	389	6	AXX83049.1 | odorant receptor [Yemma signatus]	3e-146	56.16	7tm_6	IPR004117: Olfactory receptor, insect	13.786	8.6	3.585	6.166	15.284	13.275
RpedOR103	Rp.chr4.2053	MAIDEFRKHRIVLRCFGILLPGDLEHNVVLRTIIQIWNYYMSVLFPVLTLCFLLGVLTQYKDYVITATMYAIAGVISSGCVGYKYLTLRKHKEDVKELIDFLKGFKADTRLGRLTYYLSILVESLAIGLRVVVLVEIILKGQLKLIMPFWTPFPRTNVAITLATYCFFQGSAILKTLTNFFIDTLFLLISNQTCHRLLILSNTFKMIGMSDEDKREHLKQKHVMEIPEGMKMTDEEILKLCVREHVALIKVIEKFGNILNSLFLGQVTNAFLSLCVVMFIITQAPSMVGEAIKTAPWTTVIFMQLFVSCFSGELIKTRCYDIFNTSYGNAWYNSNNKIRTSLLIVQTYTTKPKVMRGAYVFELSLHTFESAVKEIFSTFTVLYQLFNTK	389	5	QQP19773.1 | olfactory receptor 78 [Tropidothorax elegans]	2e-152	55.3	7tm_6	IPR004117: Olfactory receptor, insect	0	7.974	5.019	6.891	8.521	7.042
RpedOR104	Rp.chr5.0911	MWIIRKFHEMIYPKEPVTYRETLVFAGMVKGESIAGKAYNVFLLICVASAVAHFMLKIFLEPEDLDTPKIMEIIHWSIMYSTCCGTAADTIRNTDLLNEIHQMLKSGVYTYPEPLSDEQVALLEKEKLRIRFYVKMFFTIFTLAFFGMQLKPLTSTKDEYKLPYNGWFPFELNSFARYAAANTYQTIVGWDIAIPAHTFVVFYMVTLCHLCSQLGVLNLSMKYILKEAKNEKSNLKTKIKACVEHHNAILRYSKILQQYINIPMLLLAGAMVLLLCTTLFILTDPNSDITAIIPLGTVFIPETFMAVLLCHAGQRVTNQSEELGITLYDIKWYDIHQSKRRDILIMMIKCRKLITITGGGIQTYNHEGLKDILQAAYTYFNMLVALRK	388	8	AXX83063.1 | odorant receptor [Yemma signatus]	8e-78	35.87	7tm_6	IPR004117: Olfactory receptor, insect	0	4.232	1.258	6.909	10.306	14.814
RpedOR105	Rp.chr4.1670	MWALRLVTGEKEITTWTFHKGCLRVLGNDWINRNSRWSFVRILWLVVYPALYVLLLVTSTVLTVKIAIQMEKKTTLQFIRAVNGFIVSIPYVYATSKALIFKYHGKEILKLMDMIDRLGSFDDAGQPKRDQSLLASCLYMGLLFVTPGTWTIYFTLFHQAIPYPTDFPWDQDTTLGYVFTFGTDFVTAVYCAGLHSVYDTIFPVVVGALSGHVASLNFKLSTLGSKENQGKDKDILRECYQQHVNIIRVLKQMNDVFRLLFLCQATYTVIHACVIIYQVMQVSDIALAIMNTSPILSSAYFQLLMYCYYGQLLTTNFEELKLGLYRNKWYSSSLEVKKNLNIMILMADRPIKLDSYGITFAGHATYLSSLQDSVSYYLILKTLTTEE	387	8	AXX83042.1 | odorant receptor [Yemma signatus]	0	68.88	7tm_6	IPR004117: Olfactory receptor, insect	0	35.833	43.604	55.234	61.316	46.065
RpedOR106	Rp.chr2.3334	MKTPLRKKGLAFYLMVTNLRACPFNRGIAFVQRLITFFCVSVQVVNIVSMCYAGWDKTIRTTAFYGAIGTMTNAQQVFFHLSQKSLNRLLESFDKLHSNHKEDWEKEIFQKGFAKAWKLMETYTVTLWVFGGFYLALPAFVELFGSLITPDFPIVAIPMPDQEFIDLSVPHSFDYFFYKLIDVFWNLFSMTSHGGFEGALICSVTYTRIELEIISQKLRNLKDALNRKDSNTKEMVLNIINHHQMVLKLHDQLNNVFGFPEALQDLIFAVIFCLNMYVTTIVLKGADDYMPVVQSTFALSGQTVVLYYLCSLGESLETENAELCNCVYDLPWSTEDADFGKTVTMMIRQAQRPYIINYHRRSFLNLEALMQVISKYIKCYLLTPIL	386	4	AXX83021.1 | odorant receptor [Yemma signatus]	2e-80	36.19	7tm_6	IPR004117: Olfactory receptor, insect	31.784	19.853	4.697	4.021	10.905	12.215
RpedOR107	Rp.chr3.2418	MDVQKETTHDFSTELWPLLVFGGFEISRKTKAHFVANLIFLFALLALYLFLGTMTIITIAVLSIESDVKIQAVHIFIFIIFGIYLPVSRHACTKSLRDAVELIRRGIYNYDVRVPDLREYEIKKTRVQQIRSITSLCAKMCYVTAFSNIFLAILGAFLSGQETSDDYPLNIYLPLPIYYPFDTKNVLGYTVSITFDCLFVAVLYTTYICDLQLFSSCILQFVAHMEVLKHSLANIENRARAKFLNEHNKYRTSSKEDLYKIKEFHKYLYYCLRENILHHQQILRFSAAIRPYFESMLALAVSFFSIDMAVSIVVFISSEEILDALYSTPWPQCDERFKVLLRIFIINVKKPIVLQSTGVHVPASLGTFADMTATGYKIVNVLRTTM	386	4	QQP19727.1 | olfactory receptor 32 [Tropidothorax elegans]	9e-69	35.01	7tm_6	IPR004117: Olfactory receptor, insect	0.6	0.315	0.181	0.366	0.954	0.465
RpedOR108	Rp.chr5.1428	MPMPSQEFPDKFFTVGEIFCLIYLVSKLLCTAFSLPESEEFAVKVVVISVTVYIFFGLFTCLFFYICGKNFLGILNDLDNINQRILDFGYNEKFLRQYKVSGGRIQKFADFMAVISCVCATFFATSTPIIDYLNGNYGQNPWAIKAQCKTAQAIDKIRWMFEIIVIEEIMNYLVPGTHKFVTDCIMISLLKIQSLHFSYLSQVLQNVTMKTDKAENTKFLIWLKLHQDAVKNFNKLVLFFSPLLVVYSMGIITMIAGLLIYLVQAKNPNLFQTIFGSTYMCLSMIQLFLLGNATDEVKNVSESIAFDIYSIPWYEMDTKDRDYVRLVINIANYRVYVEAYKTPAFRMDRETYLKIFMSTVSAYIGLKKLIEMKDAGLAELDNI	383	7	AXX83024.1 | odorant receptor [Yemma signatus]	2e-72	34.11	7tm_6	IPR004117: Olfactory receptor, insect	0	17.323	15.923	28.58	64.076	64.719
RpedOR109	Rp.chr3.2480	MKVIHENEGPGSKETVLHVYDFLAEKKWLMLFSGLAITEKSTFWTKLNKLYVCCILAFLCYNMTLTGGAVLLSLDDKVAMTVAAHFFLLTVLLMSVIFIKTFYNSAHKAASESIRQGIYQYEYEGPEITKLRKNGVGYIRKCSSFITISVMAGIQMTFIGNPIARLMVSDEESWRKTINPNLPIPVYIPFGADTTSGFCIAWVILVIYGWYLMSGMIVLNDIYVSCAIQLRIQLEILNYSIETIEKRALMKLVNNVSTSYNTARLNELYERSDFQKYLYLCLIEDIKHHQAIINFRNLIQTFFGFYLLAVFMLASITLAMGLIVIIEIPEITSLADFIKNMVVEMGFVFSLCLYGEQVIGWSGKIPESLFATPWIHCNKRITH	383	4	AXX83011.1 | odorant receptor [Yemma signatus]	2e-58	34.96	7tm_6	IPR004117: Olfactory receptor, insect	6.648	5.558	3.459	5.71	7.83	4.807
RpedOR110	Rp.chr2.1322	MDNFGKHISVFKILGIYIDDGSVGWIGQAIIRSQILVGMFLMGFQYIISLILGILWLSKDYEMRENLIVLCSIVFGIVTVLKYIMFLRKRKVLAKLTNHLKGFRPSTTIGKYTRWFTYLYEGMAVYYNISVVLMAVTTNPDLSLPFPIWYPIEINTPLRRVVSFLMVHIAIAYAWTCMVLTDTLLLHLSNQLCDRMWTLNGTLRLIGLPEDEKDSERAKNRILILDNYKDNELIQSCLAEHILLLKLRKDLGDMLNETFLYQVINSMSVLMVVFYVFTNSDTLVEDSAGFAGVLVVEMVQVLTSCLSGELLKSRSEAIHFAVYNSRWYDCDPKLKTSLLIMATYATHEVDLKGSYVFNLSLATYETFVRQAFSMFTVMYQFL	382	9	KAE8573746.1 | Odorant receptor 140 [Halyomorpha halys]	1e-83	52.3	7tm_6	IPR004117: Olfactory receptor, insect	0.101	0.159	1.095	3.693	11.018	9.521
RpedOR111	Rp.chr3.2404	MSMVFAIPLLNFYYNHNYKTAIHLLKSGIDRYSNEEPDAQHRKFKEKRVKQVRLWSFIIGVLCYLVAIFYTLRPPLMYILMTTDDTSNNGINKYLPLSLYVPFNTKHPFAFAIAYLSSCIYLFLLYTTLVCFVEAYLSSVLQLAAQIEIFNYALLNLQNRACIKFKLANKFCYCNDTSLDSEGRRELQRSRYLCLRASLQHHQAILRYYQEIRTYIGAMNTYSLLVFALIFASSIVTVIQDPLGNMAVIIQLVNEITGYFQIFMVGQIILDKSTDSMMSIYSTPWTSYNKNYSIMINIMLTSAKRPMVIRAPFFNVDWTLETYGVVSIIWRLQTCEYPNEYCFVEYELLKIYVRRATQDYLNTKMYLAKTKEPLIFSTKH	380	5	QQP19727.1 | olfactory receptor 32 [Tropidothorax elegans]	6e-67	37.22	7tm_6	IPR004117: Olfactory receptor, insect	2.741	1.12	0.183	1.671	1.938	1.536
RpedOR112	Rp.chr4.0459	MQVFIQVMAFYAMYLVSSHKSLIFDALHVVTASWFGIWGIIIRFSANRSLQNTVNRIKSGVYHYDGEELDEEQLKMKAAIPGEIRWKCNAIVFMYALGFTSNTIFFPLSQYFMFDEETGFHPDFLNPYISHVFYIPFNTRTPLGYVAIYFIDFFFLLVLYTIAVSLNRLYITCTVYVKVHLQILNHSIKNIQRRAYHLYVKNNNMNEGWVSEQDLLNTREFQDCLYFCLKANVKHHQILLRFRDDCSALVGGILLELFILVAIIYASTLYQMYQKLPLNIMMNYVFTSMAEQTYTYFICTFGEELIQESGNVFLNLYNIDWYHYDERFKQTLDIMMVNSRKPIDFKAIIMNAPASMETYGDSLITMYKLMNVARQSDVLN	380	6	QQP19728.1 | olfactory receptor 33 [Tropidothorax elegans]	5e-75	34.25	7tm_6	IPR004117: Olfactory receptor, insect	0	19.366	11.01	10.767	23.814	24.224
RpedOR113	Rp.chr5.0882	MPLPSEQDPDRSLSVREILCLAYLLSKVVCVAFGTGETEVFAVKVNIISIAVYIFFGFFDGLFFHIVRKTFLGLVDDLDEVNQRIIDFGHHEKFVRHCKENEERVNKFADFMAVATFLCAVSYAISTPVLDYFEGNYGQYPWSLKAECKPALVLGKVPWIFEVIIIQEVLSYLLPGNFKFLTDCIMISLLKIQSLHFSYLSDVLQKIPMTSDSSKNTNLLVWLKIHQNAVIHFQKLVRLFSPLLVLYSMGTITMIAGILIYLVQAETSNLFQSISGSAYMCLSMFQLFLMADATDEVTDVSESIAFDIYSIPWYEMKIKDRNHIRLVMVISNYRVYVEAYKAQSFRMNRETYLKIFMSTISAYIGLQKLIKMNDAGFVQE	380	7	AXX83024.1 | odorant receptor [Yemma signatus]	6e-65	32.11	7tm_6	IPR004117: Olfactory receptor, insect	0	1.761	3.119	3.156	12.876	13.707
RpedOR114	Rp.chr3.1022	MVADRDLKDLVYYLKLQGLWYKFDGKYSTIFAFLQHIRLIYFGGVYPFIVASMYYTGLKDSLSKYAFLASAGFYVSIKAISYFFNQNNTESIVNRLTKLHKKRTSPWEHDLFYKYSGAIWKIVYSYSYLAVSFIAMYFVFPLIYDTFLAAYTESKVPFNFPFPLEGLTKKERSYQYYITLFASLFWTINVLSYALGSMAVLWVSVSYCCVDLRIMCRLVEEFGSDVNNVRKMGQLIEDFKQILELSQDMKQVIGPPLAAQNAVGSLLLTLFLYSATVQYDVVLIIMSIYFLTCMSVLMFFSCFIGETLQIESSKLFDAFCELPWYEMTPDMRRILSFIILAASKPMVIDYKGKLPLNLKTFMQMINSSYSYLMLLYSMN	379	5	QQP19760.1 | olfactory receptor 65 [Tropidothorax elegans]	1e-60	33.98	7tm_6	IPR004117: Olfactory receptor, insect	9.874	8.505	4.783	4.653	11.522	9.123
RpedOR115	Rp.chr1.2914	MWRWPHIFWLNIFGWWGEDASHPFMKWFLPKLRTVVVLHALAMSGAMVIAILEKFSKGDIMTNMFTVFASGIATTGMFKMLQVVIHRRTLKSTMDSLDDLLEEVNTPETYSIMRRGFLRCWMIFLFSLVTGSCITLHWLTRPLIAAAHGEKTRIVDTWPVLIDTWPQFAASYAFQSPGVSSIGHSFYLYDNLYFCLSECILSHFEILKHRLQAMRLAYPPASADELQACVRYHIKLLRACNKLRDASKSTIMFQCINTVVMACSGVFVLTMSKGLNANVLMNLTEILLIITIALYSYCWYSNEMTFQCEQVAGAAYMSTWVNTNTKNQRTLHILMTRTVSPVRFGGILKINLSTFISVLKTIFTYYNFLLAVNGKEVD	378	6	QQP19777.1 | olfactory receptor 82 [Tropidothorax elegans]	3e-158	58.89	7tm_6	IPR004117: Olfactory receptor, insect	3.776	4.666	3.874	2.239	3.201	2.732
RpedOR116	Rp.chr3.2411	MVEVHNNAPIYHDFMQERRLFMILSGFVFVKEPILHSALNSAWLALVYLICPYLCATGIFTLLTIPMDRVTQMGLFQEVCVFIAIPTLSQIGRYSRSSLRKVIEYLKSGMFSYDGVNDGISKIQMSYVEQIRSINVIVNGLVFVFAISKTFGRPLFNLICYTGDAKGAVINPYLPIHLYVPFDTTSPFGFSLAFFSQALFFFFMSTIVIAHVQTYVSCAMQFTSHLAVLNYSLETIEKRAYCKLAKGKFSMENVKECFYTLAQFQKCLEDCMRESIQHHHDILRFESVICPYIELSSGLAIVFFSLLLAQAAVPSLESSEIKNALYSTPWPQCEKKFRVLVAIMMANTQTPIVLRAKGFRSNISLENFADVDGVGGL	377	4	QQP19727.1 | olfactory receptor 32 [Tropidothorax elegans]	2e-54	38.11	7tm_6	IPR004117: Olfactory receptor, insect	7.163	5.485	1.11	5.239	10.745	12.148
RpedOR117	Rp.chr4.0997	MFLVVMAIYGSYLVAPNKELIIDALHVFLIAVFAMWGLSTRLIAWKSISRSREYILSGFFHYEGEDPDPEEMKLRKSVVEEVTTRSNQFLALFLSGALSNIIFFPTSQYLLLSEEEYEATVDIANPYLPHFFHLPFTTRTTAGFLSGLFLNLLLLLYIYGMAVAMNRIYISTLIQFKVQLQILNHSIRNVHRRAYLVYLRRHGLHLGEVAEEDLYDNKEYQLYLNKCLKSNIRHHQTLLRYHVDSQAFNGSCTLIVSMIASMIFASLLYLIMKKPPPNYLVNYMISLLTEQSYAYYTCYFGELVLQESGALFESLYSIQWYKSNKEFNRLLGIFMCYTMKPIRVKTLLLDLSASLQSFGEFMSAMYKIMSLLRQSDK	377	5	QQP19728.1 | olfactory receptor 33 [Tropidothorax elegans]	1e-87	41.39	7tm_6	IPR004117: Olfactory receptor, insect	0	2.258	1.665	0.936	3.07	4.049
RpedOR118	Rp.chr4.2040	MFINCLTVYTLYVVSSDNILTAVVLHNVADTVWVLWTIASRCATERALMEMRKMINSGIFVYELEDLEEQQYTVLKGIAKEVRSKSNRYLIICFIGTFFGMFVFPLVDYLTTTDGDQEEYPLNPYLPHPCYYPFSTDTILGFTSAYIMDVLYWTYAYAMAYTSNGLLISSTVHLRAHLYVLNYSIMNIHKRAYKMFIKRNHEQIRESSMDELMQKEEFRRCLRSCLKANIEHHHAILRFKHVCQPYNGLSLLNMITVIVALYAPLLYLLLQDLPMFAKIKCAGTFIVEQNYSFLICNFGQDVLTESSALFGALYSTPWVNYDKDFKKTLHIVMSNSIEPMEIKAYLLDFSATLESFSRLQSAVYRVMSLWRQSDKIK	377	6	QQP19760.1 | olfactory receptor 65 [Tropidothorax elegans]	2e-66	35.82	7tm_6	IPR004117: Olfactory receptor, insect	0	9.087	3.677	3.255	7.167	5.919
RpedOR119	Rp.chr3.0941	MAIYGAVLIPSKRVRVDTLHYCLLAWHAIWGQMSRIVTHKSLNRTKKMVQQGIYHYNDEEFDEEEQKLKECIPGEVSRKFNFYLYMCLCGLVSNQIFFPLSQLNAITEEDFIISDDWMNPYLPHILYMPFNTRTVVGYTIAHILDSLFYSSLYFTTLSMCLIFISMEVQLKVHLQVLCHSIRNIQKRACQKYMKIMDVRSDNLDQDYLFESELFQSCLTSCLKANVKHHQTLLRLLKESKPFLSSSMFVFFALDATIRATVLYSILLNPRFNLMLNYILTFIAESAYSYQVCTLGQELIEESNQLYESLYSISWFNYKRPFNKTLHIMMSNIQKPIQFKAMFLGIPASLDTYATLFSGMYKITNLVRQSDSSLKKAK	377	6	QQP19760.1 | olfactory receptor 65 [Tropidothorax elegans]	6e-69	34.92	7tm_6	IPR004117: Olfactory receptor, insect	10.028	7.582	5.918	8.981	11.443	13.458
RpedOR120	Rp.chr5.0441	MAKYFQLPDDPYDQLIWLLEAIGELKTEKFSLTNRMMSVLVALLTVNGWLGPFLYAVTSDGPMGEKGEIILHATSGLHICTKFYNNVLRQKEARALLNLTKSLWNTKGGSRWKELKADCDRRCSRTMKVLFATLNSLVLLMILKGILLNLDKAPDDWKLPFPCWLPLDKREWFFTNCIWEVVTLATEMFSVSVHYSFLYLTIIQASAHMDMLSHMIQSADIQVNDAIQLHIKIIRLVKYLNEIHSGQMAFEMCLYGLQVATSGFFIMKFVRTQAGLGSLAFCIYVFFLYISFSYLLCLGGHEITVQSEKVYSCIYQTRWYELSVEEQKSLGLMLYVASRNLQIKYKGLVTFSMERYAQMIQATYSYLTVLSGMDL	375	8	AXX83064.1 | odorant receptor [Yemma signatus]	3e-70	35.31	7tm_6	IPR004117: Olfactory receptor, insect	0	0.487	0	0.941	0.701	1.317
RpedOR121	Rp.chr5.0440	MAKYFQIPKGPIEFLSWLLECSGQLRTERFSPLNRLMTILGGVFTANACLGPLLCAITYDADSQERGEMILYAVSGFYICTKFYNCVLRRKDVREILKLMHSLWETRLDGNCLEIKRRSAERCRSTVVKLFSILNSLVVLMVLKGIVINVGKSPEERKVPFPCWFPLSDKKWFLTNCVWETLTMSFEMFSVSVHYSFLCTIIIQASAEMDILSARLESGDINVKEAVKHHIKIIRLVKYLNKIHSGQMALEIFFYGLQVAAAGYTVMKLLHSHAGLGQLGFSLYVLFLYISFSYLLCLGGHEITTQSEKVYSSIYQTRWYELSVEEQKSLGLMLYVASRNLQIRYKGLVTFSMERYAQMIQATYSYLTVLSGMDL	375	8	QQP19722.1 | olfactory receptor 27 [Tropidothorax elegans]	4e-66	38.77	7tm_6	IPR004117: Olfactory receptor, insect	0	1.46	0.372	3.01	6.033	7.543
RpedOR122	Rp.chr1.0950	MRMREMIKSGIFIYEEEELDNEQLNKLKGIKKDVFSKSKQFVIPMFSGLFFVSDVFPLCQYLTTTSSDDEQLVNPYLPHPIYYPFDTDTFSGFAMAYVVDVLYWVYLYCTAVLSTDLLIYCTVHLKVHFFILNYSIMNIHKRAYRLFARNNNQKIEEASLNELKQSREFQTCLRRCLRANVKHHQTLLRFRNTCQPYNGLSLFILTTVVVVVYAAVLFLLLQNIPLILKIKYAGTFLVEQNYSFLICYLGQEVTTESSGVFGSLYSTSWMYYDKDFRKTINIMMSNTISPMVIKAYLLDFSATLQSFSERSLVVLGITQKAVRWRLDTCGIGNTSVKIDNAKGKVKMAYGGELWEDYDKAGISGVQNHEPLEAV	374	6	QQP19760.1 | olfactory receptor 65 [Tropidothorax elegans]	8e-49	36.01	7tm_6	IPR004117: Olfactory receptor, insect	11.243	6.83	2.61	8.676	6.611	7.203
RpedOR123	Rp.chr4.1088	MAGNQCDDLKKISHDFLSPENNFITYLIGFAPAKSTGYLVYRLFLLVVLATVTTLIIYGLILVPDKRLIVDSVHYLVLCFNGLSVLSNRIISRRSLFRAKDIVQYGIYHYKNEEIDEEEKKLKEGIIPEFKRKFNLFLTCQIFGFVSNQVILPITQLSYAGDEHYDDEHDFINPFLPHFFFVPFNTRSIVGYFVTYIFDSICYFYMYSASLCMLLVYISCTVQIKTHLQVLRHSLKNVHKRAYNEYVRRGQHVEPGTLMEDLFEDKEFQLCLNSCLRSNVEHHEAVIRLLKEAQPFCGVSLMYAFSVCSVFYASLLYLISQKPQTNFLINYLLTFVAESVYLYQLCVFGDEVMQEVISGMYKVVSLARQSDVLS	374	5	QQP19760.1 | olfactory receptor 65 [Tropidothorax elegans]	3e-44	32.88	7tm_6	IPR004117: Olfactory receptor, insect	0	10.082	8.016	7.733	26.586	28.933
RpedOR124	Rp.chr4.0834	MASMALYAAYLVAPRLNLIIDALHGMIAVLFAGWLLSSRIITDRTITKMRNMVNAGIYYYEGEDLSEEEEDMRRGIEEEIKKKAHTIHIMYIIGFTSNLFFFPLSQVFLVTEETPGVLNPYLPGVFYSPFDTRNPVGYTAAYLLDMFFWAFVYITAVSVNGVYTSFTTHLKVHIKILNNSLLNIEKRAFSMYRKKNKDLVHIFNQNLFENKEFNNCMYSCLRANIRHHQALLRFKNESHSFIGSILLDVFTLASLNYACTLYGISQSPPINILVSYMMTNMAEQTYTIFICFFGEEVMTESKILFQTLYAISWYNYDERFKKALEIMICYTRKPIEIKAILANTTSSLETYGHILTMMYKLMNLARQSDVLS	372	7	QQP19760.1 | olfactory receptor 65 [Tropidothorax elegans]	2e-70	39.11	7tm_6	IPR004117: Olfactory receptor, insect	0	11.934	6.747	16.118	25.032	28.967
RpedOR125	Rp.chr4.1983	MAIYASCLVVPDKILTVSCIHVAMIATFVIFVLSSRVFTYRSINETNIIINSGIFTYEDEEVDEKHLEVKKKMHRDIKKISHIFSILFFAGGLSNLTIFPLTQLLFRTEEDDGSIFNPYLPPYFLYMPFDTRTFKGYCLGYLVDVILVITLYGITICWMDFYIHCILQLRAQLQILIISLQSIQRRAYTKYKENGGSESKNQSTELLYKEEFFQKCLYSCFRSNIQHHQALLRLKKALQPMHGAGMLDIYLMAALIYAAVLYLIVQDLPANYLVNLVVMLVAEQSNLLLMCVLGEGVSEESERLFEALYDIPWIDCNKSFNRAVDIMMCYVRVPLKIKAIVIGSPADIEAYGELMSVMYKTMNLVRQSDVTS	372	6	QQP19716.1 | olfactory receptor 21 [Tropidothorax elegans]	5e-35	50.35	7tm_6	IPR004117: Olfactory receptor, insect	0	51.45	18.57	22.576	52.28	49.04
RpedOR126	Rp.chr1.1245	MVISMGFTAAVLCADDLVLSLQCVHTALVDVELSLNLMIRFCPQYRVLFRTLEILKAGVHKYDEDVLNGEYKEIQRKYLPEIRHLFRVLLVCAFISNAIIVPIMNFIFVDVDASKEVVNPYLPSFFFYFPFNTATVIGYTVAYSFIAFAYFTIVAPIVLSIDSLYVSCTTQLKAQFHILNYSLQHLEKRAYSDFMKIETSEKKKRLIDNLYNSKEFLNSLRICFRSNIIHHQNIIELKKSFEAFTGVTLLLIIGLMSSILAINVIVILQKPNIYLVTNSIMVLIFELYFVMHYCRFGDDVLGISSEMYDVLYATPWYNCDGAFKKYLSIVISNTRKPVVLKTALLELLASMDTFGMIISTMEKITNVIAKT	371	5	QQP19780.1 | olfactory receptor 85 [Tropidothorax elegans]	6e-60	34.31	7tm_6	IPR004117: Olfactory receptor, insect	3.119	0.984	0.376	2.852	3.687	3.631
RpedOR127	Rp.chr4.1985	MSFCAAYFISPDKAMIIDASHVAMITIFATLGLTIRLITERSLAKANIMLNNGIYTYEGEEVSEVESSLRGGIASEIEMKSNLFFVLFLSGSISNLTLFPLSQLQFYNEEDANYILNPYLPPYFFYMPFNTRTLLGFSVAYVLNIILVVTVYGIDLCMVEFYIRCTAQLKAHLRILNNSIRNIQNRAFTMYARDRNINHGEMRIDLYERQEFQTCLYSCLKANILHHHALLRFQKAFQPFNGACLLDTFVMASAIYAAVLYLVLQKLPINYLVNFILLFLAEQTYLFSICFFGQEIIDESSKTFITLYDIPWFYCNKSFNQALDIMMCNNLVPVKLQAMLIDGAASVETYGTLMSAMYKIVNLWRQSDSGM	371	6	QQP19760.1 | olfactory receptor 65 [Tropidothorax elegans]	3e-73	38.44	7tm_6	IPR004117: Olfactory receptor, insect	0	10.163	6.39	8.936	9.643	6.656
RpedOR128	Rp.chr2.1707	MENECQESVRKTYATMGITEKGYTFVAFFIPFCLLSITGYLVYKVMYPKDELMLVMLHLVNLSFFFIGSLSMIHIKRSSILKLAKECDTFVGLTSAKYREEYKNIRESLNPSKMVWGAKYMIFQIFGIGQFIIFRPLIRHYIFGGPREFMISGTEESDLKFFFLYIYQSAYMVSSSFSVNANLQLTMEILLQVNCKLRLLNYALADMKYVESLPMDIQIANWNKTANECAMHYDHIRRIFKEFRSFCGSSFVFIYFGLIGSITISRTAVTGDDPDYGVLPEFVVESAHIFYLCLCLQEVIDQNDDIVRSIFDSDWQYFPRSTVKILLITGIRSHEAPSVPLYKGGSPASLQTYGMFINASMAYFMSAIMLE	371	5	QQP19749.1 | olfactory receptor 54 [Tropidothorax elegans]	7e-101	44.02	7tm_6	IPR004117: Olfactory receptor, insect	28.283	20.49	14.283	11.788	16.591	16.217
RpedOR129	Rp.chr3.1126	MAAFAIYFTAPNKVLMASALHVVLITTFVIFITACRYVTARSIHKTNKLMKSGIYEYTDEELDENLLNMKTSIDKEVNKTSNFFSAMFATGGVCNITIYPWTTLLIDMDDKEDSIVNPYLPPYLIYMPFTTRTISGYCLAYLINVILVIYLYGITLCWLDIYIHCAVVLKVQLQMLNYSIKNLQNRAYAKFKERNRNISHEYSAEALNEEKGFQSCLYSCFRSNVQHHQALLRFKRALKPFLGAGLLDMYLMAALIYAATLYLIVQDLPVNQVVNLALMLFTEQSKLFIMCHLGEAISNESTGLFDTLYHLPWNQCNEHFKKAVSIMMCNTLQPLKLKAIIIDKPADIRAYGDFMTTMYKIVNLVRQSDVT	371	6	KAE8572983.1 | Odorant receptor 124 [Halyomorpha halys]	8e-65	55.25	7tm_6	IPR004117: Olfactory receptor, insect	8.63	5.901	3.007	4.183	5.247	4.72
RpedOR130	Rp.chr3.2457	MPRTNWFRDAWNSFNRESDEEVFNIIWNKYYGLFQLCGLYPKLDGFWAFLGILHLGIYVGIIAFHWFIFVVSIPKMQKINFVLFSEMIHYLVLATLTIAVLVFVFSKRPNLARFHRVIHGGVYDYKEDEGEVFKAFNDEIMVEWKKLLIVPFVVTVAASSVVIFGPIFDNYGTFSPDENHDPTVKFNIPVPMYLPFSTENYYVVLIVSLLQVSAAGIAGLTMACGSLGYVCLTQTVTREFRILLNAVDCIHDRATSLHLQKYGIKPPGQENALYQSSTFNACLDICYKKLHEHHLAILSLADDMSAILGFPNIIAFGGGPLIIGMALLSTTISGGQLPGTTITALVLCVIEITYMYLFSALGQRVTDLVI	370	3	AXX83034.1 | odorant receptor [Yemma signatus]	9e-64	36.13	7tm_6	IPR004117: Olfactory receptor, insect	11.26	3.945	3.957	4.003	8.531	9.344
RpedOR131	Rp.chr1.1248	MAFSGAILSSDNIVVSLQCAHIGFIVTEMLLNQGTRLCPQFRRLHRTMEILKAGVFLYNEDILNEEHREIKRKYVEEIRTTTNMFQKLLLSVAVSSMIVVPIMNLIIIDVDASKEIVNPYLPNFPMYFPFNTTNCVGYTGAYIILLFSCLCVVLPILISMDTIYVSCTVQLKAQFHILNHSLKHLEKRAYSDFLKSNKSTDKKYFCENLYNSWEFLNSVKKCFRSNIIHHQILIELKKSFEEFTGLTLFLIIALTSLILATNVLVILQKPQIYVATNAMAMLMCELYYVMHYCRYGEDIIGISSETYDMLYSTPWYNCDSAFKKYLSIAISNTRKPVILKTILLDFSASMDAFGTIITTMYKVINVITKT	370	5	QQP19780.1 | olfactory receptor 85 [Tropidothorax elegans]	7e-68	38.31	7tm_6	IPR004117: Olfactory receptor, insect	16.995	15.286	7.161	9.341	19.764	18.445
RpedOR132	Rp.chr1.1250	MCLLAMYLVNDIEIMMESFHTFIIAIYSCWGVTVRLRNDRSLKKARNLIVSGIFLYGEEDSDEGAVHMKKEAVLQISKRINFLALILLTTAIYAIVFLPLSQLFFLKDSDDDPSKEILNPYLPNHIYMPFNTRTYIGYVGGILVNFQYMFYAYGNATCLPQIYISLALQLRAQLQILNRSLRTIEQRAYTKFVKMNSSVQSVDRQDLYKEKDFQKCLFSCLRANMLHHQALIRFHKEIEAYVGATLLISATLASVDYATSFFLILQNPPLNMIVVHALTLLAEVGYTYFLCYVGQEVLEESSNLHESIYATPWFQCDQRFNKIIDVMMCYTLKPIQMKTLLFDFTASFKTFGDVMSAMYKIVNLVRQ	367	5	QQP19760.1 | olfactory receptor 65 [Tropidothorax elegans]	6e-67	36.48	7tm_6	IPR004117: Olfactory receptor, insect	8.304	3.811	3.04	4.228	8.027	7.463
RpedOR133	Rp.chr4.2907	MTVLTCILVPVRQVIISSVHSLANQMYIIFMFFAVTFLLQRSLEDTGTALRSGVFRYEDEEEDKELMIMKESLPKEIRRTSNIFICMFVSSGINSLILLPLAQKLLDPSHSSAVENPFQPNSEDETLLGTVIGWSIGAVIMFYMYAITCGINWYYINGVVQLKVHFRILNHSIANIQRRALSMYTKKRAIPVSIDLERLFRDEFFQTCLYMSFRSNIEHHQALLRLRKIFEPFSGSFTLCAFLLAPFAYGCLLYLLCQVNPVNVTINLCLTFVAEQFTVIFICFLGQDLYIESEEVFERLYSIDWYNYNKKFKQILHIMMTNSLRPAGIQALIFGMPASLQTYGNDRTGPSSDVGECLPACRHMAM	366	6	QQP19760.1 | olfactory receptor 65 [Tropidothorax elegans]	2e-53	33.24	7tm_6	IPR004117: Olfactory receptor, insect	0	4.486	1.333	4.433	6.324	5.888
RpedOR134	Rp.chr3.2417	MEENTSATTHDFSSELRPLLILGGFEISRQNRILSALNIFFLVFMLVLYVFMAVMALITIIYLPLESDIKIQAFYVFSFLLVAIYMPGSKLACTSSLSLALELINKGIYNYTYTQSDERENQIKKARIDQIRSGTNKCMKLCYVSAFSNIFLAVLGAVLTDAGMDTDNPLNPYLPLPIYFPFDTRTVLGYAVAFTSDCMYMTVLYTSCICFMQTFLSCTLQFVAQLEVLNYSILNIEKRAFMRFRQMKPHFQNEVHTLYETKEFRECLRFCLRENIIHHQTILRYNSAIKPYIGAMIALAISFFSIVMAASVVVFIEHPGIKVALIISCISQVVYFFLMCYLGQLITDKMALTGYKIINVLRTNM	365	4	QQP19727.1 | olfactory receptor 32 [Tropidothorax elegans]	4e-53	37.13	7tm_6	IPR004117: Olfactory receptor, insect	0.528	0.333	0	0.386	0.865	1.107
RpedOR135	Rp.chr1.0312	MDGRNTPCEDHMWAWYRLVGVDRAGMNMLALLEVLSMFVNTLWIIHMLLFTPVQDAIFVVHFLTLAYFYSGILWTVLHKKPKIIKVAKECDRFVGLTAPEDREEYARIASDMKFSKLYLGTNIMTAQVFNIAFIIATRKIFKHIIFGSPNELIFSGRDGSTLRFWVKYVVQATFMATAGICIAVNTQLLYRIAFHIAVKYKLLCTQLARIKTDDSLPKNVQEVELNKAVKKCIIHHQHLISIFSDFKKVCGYSFLFTYFGLFASIGLSRTALIGQQPDYYFIPDFITESGYLFFQCFCLTDLPSLNEDVRKAIYENEWMWFPRSTIKMLHIIGTQTKKEPHVHLFPGGSPATVQTYGAVSNNIL	364	5	QQP19749.1 | olfactory receptor 54 [Tropidothorax elegans]	2e-100	43.5	7tm_6	IPR004117: Olfactory receptor, insect	7.312	4.845	3.831	3.876	3.758	4.317
RpedOR136	Rp.chr3.2398	MANSDKVHDFLNERLIFKVIGCYNILQSSRLHFVINIIFLACSFALYMYTFSMCIYSLTLPNTEPAFKVQVCQILSVMNMVFVVPSLSVYYRQNYKSALRLLENGFDKFVREETSGSRTDFRKERVQQVRLWSFMFAVLCYMAAVFYTLRPPFMYILNTVETGANDSVNPYLPLPLYVPFNTRTTLGFTVAFLSNVLYLFLWYTILTCFTETYLSSALQLLAQIEIFNYSLQNIQNRANIKFKLGRNSTYRSNNSRDSDPEQDLQKSLYGCLKTSLQHHQAILRYHQEVKEYLGAMNTICLVMFTLIFATSIVTVIKERKRPCQLTSGKPTVQCATITRTDKCLLIRTTLSASTNASEMPRATM	364	3	QQP19727.1 | olfactory receptor 32 [Tropidothorax elegans]	3e-37	30.13	—	IPR004117: Olfactory receptor, insect	2.437	0.501	0.575	0.388	1.734	2.344
RpedOR137	Rp.chr3.2354	MVMAVYTMTISFDCKLALMKAFHSFWLLLLAVILWSIKAFTARSLKEGTRIIREGVFCYLNEEEDESHNEIKRLRVDQIRSAVSACVKLLLTSAWVNTFLFPLVKWLTVDEGSSLQPINPYLPLPFYMPFDTRNYLGFTAALMFDGTFFFSMFLSVIALEVTYISYSLQLIAQIEVLNFSLMTIERRALTKLGKMPYKDEVLIREVYRTAEFQKCLYSCLRENILHHLAIIRFKKAVGPYLEALNGFGIGFFSVIMASSVFLILEEPSVHMAILICSEIICCFLANLVGEMIIQKSNETAYSLYSTPWPHCSEEFKFLLRIMATYLKNPITLKATGFNCVSCLETFSDMMTAGYKIFNVLR	361	5	QQP19727.1 | olfactory receptor 32 [Tropidothorax elegans]	2e-44	62.88	7tm_6	IPR004117: Olfactory receptor, insect	2.564	1.853	0.386	1.368	0.874	0.746
RpedOR138	Rp.chr2.2668	MVFCLKFAGMLYINSGLLLKIYMMYHFSIILIFGASLSLFIVHDPKPIMEKLQTVHYLIALVQIFFKFLSIVLNQNETLDILSDIEDLSKQALRDPGNANIINRADRLSMKISKFFMFFFCAYYPLRVTNLLLKYFVFRRPQLFLEGSWIPPVIASNYIFSLFYQVFTSLCAGFTNASYSCFITFLTLQISAQMQVLRRMLEESEELEPCIILHQKLMRLFFRVNRLLAGLMSVEIVLSSFYSCICTFLIIKSSATGGRDAGNHAHVLFLVLIRSFLICYCGNIISKQGEKLHTSAYFGKWQDKDERHRKSLQFLMVLTTVQPFKYNYHRIVSMDMAQFMKSIQTTYSYLTMLLSLADHK	360	7	QQP19737.1 | olfactory receptor 42 [Tropidothorax elegans]	8e-153	65.8	7tm_6	IPR004117: Olfactory receptor, insect	15.322	20.608	15.493	16.262	21.772	18.706
RpedOR139	Rp.chr4.0957	MTAVKSYSWSVGYSMQAVNYLMMLVSILSTFTTPLNRRREFSRIHKSIATGMFMYDDEVLSANAEKLKAFLTIVMRYILLCPLFCLAGTVSLSAFMPESKERYINDIDMSLLIGVWFPFYADTRLKYAVAMMSQFFLCQLYIGFGTFWFAFLVFSTLFALVQMQRLEDSIKGIHERTISLMKMKFAKDASKQLEDELLWKDEKYIECFILCLKENIAHHRLIVRYIDDFQRSIGAPMLVVFITLAVSMGTALSTATADDFLGPKINAVLIGVVQFCSSFVFCYIGQKMTDYSENLRATIYGMKWYSAHKRISGCVKILMEATLQPVVPTACGVLAFNLETFSTMTDIAYKYYNLLLITRS	360	5	QQP19727.1 | olfactory receptor 32 [Tropidothorax elegans]	8e-34	39.22	7tm_6	IPR004117: Olfactory receptor, insect	0	4.223	3.68	2.155	2.776	1.372
RpedOR140	Rp.chr3.2289	MINAVHTFLMPSFGVCGLSVRLFTHRSLYRTWEMVRDGIYRYKNEDLDAEQVKLKGTIVPEVKYKTSTIFVIFVLGTFWNMVCFPLSQLITVVEEERDHSQDLINPYLPQVMYTPFSTRNFFGYSAAYMMSVLLFLYVYGVVVCLNEIFVSCIVQLKVHLKILNHSIRNIHRRAYLMYRSFYGGDHGDIAQEDLFSRGDYQNCLYSCFRSNIQHHQALLKFKKEWQNVGGGTLLSLMTVGCFVYASFIYLSFQFQKLPVTLLASYVITLLVEIAYPYCNCLFGEEVIEESTTMFEELYGMPWMHCNKRFNRALNIVMTRSVEPIKVNALIINASASLDTYGDLITAAYKAANLVRQSDKY	360	6	QQP19760.1 | olfactory receptor 65 [Tropidothorax elegans]	1e-88	36.6	7tm_6	IPR004117: Olfactory receptor, insect	7.715	6.757	3.292	4.114	10.083	9.603
RpedOR141	Rp.chr1.1254	MFFLSITKELFVQTLHSLMLLLYSFSILSSRVAIDEPLNKTRELLNSGIYEYKDEEPDENIIEILKVGQSLIKKRSDSFAYLMGFSGISNTFLFPLTQLLIITEDTSESPLNPYLAHPLYLPFNTRTPFGFTIGFILNGLVLVNVYGIVITTNDIYQRCTGTLKAQLEVLNYSLKNIESRAFNVYKTIRPVHPNLLREELFQIKEFQSCLYQCLKSNVKHHQALLHFRNTFQVYTGTTLLVMVTVATFVLGTVLSLLLQQPAMNEAVNYFMTLVAEIGYPAYLCYCGEDVLKESSETFESLYETPWIHCDEKFKKVVHIMLTNTRTPMKIKTRVIDLRASLETFGVVMSNMYKFVNLMRH	360	5	QQP19768.1 | Olfactory receptor 73 [Tropidothorax elegans]	7e-92	41.16	7tm_6	IPR004117: Olfactory receptor, insect	4.929	5.405	1.549	4.702	14.612	11.723
RpedOR142	Rp.chr4.0600	MSALHVFLIAAFALGVLTTRVFGDKSFNGIREMLACGVYSYDEDLDEEQTIMMNGAVGEIKRKLSIFIYVFLFCGVFNMTVFPLSQLLMLPVEGAGDSNELVNPYLPAFLYMPFSTRSILGFLASYLIVFLLLMVVYGQATCYTVAHLSYTVQMKVHLKLLNYSLNNIPTRALRIYRQKYGENTSSAQVTNQLLFQNDDFQKCLYYCFKANIQHHQTLLRLVKMSRVYNGGSLLTTICLGSMIWASILYIVYQDPPVNVLATCIITILTEQTHSFYLCLFGEEVITESSKLYTSLYNTPWIYGNKNFTKSVNIMMSNTLKPLKIDALLIHVSASLETYSDLISGMYKLMNLLRQSDAL	358	6	QQP19760.1 | olfactory receptor 65 [Tropidothorax elegans]	4e-77	36.34	7tm_6	IPR004117: Olfactory receptor, insect	0	2.156	1.141	1.924	4.735	3.429
RpedOR143	Rp.chr3.0511	MDSERTVFLRGLLTFGGHWMKFEDKPLGVVFSLIQWARHAYLILGLLLIWTSLFIKGLSFLLTPTAVFIPLGLNIVVTSVVLVANFKNLELLVRESEKNISTYKEVWEKEIIAEDTKLLSKIAKFMIYGLCSFGLTYVTLPFLIDGIRAYLGYSEPYIVPLPLDGYFPENKTRSLSYYTIVVCSDLWFFLAVPNTVAYECMIFLIISYTTSEIKIVIRRLRMLHSKSDMGVLLTKDWDMRHIVRKHQQIVRLNNLQKKHITLPYICQVVISALSICFTMFLVNQGDQLFFEICDLPWYIQSTKARKDIIIMLTQSSKKFVLEYANCFSLNLQANMQIINTAYSYYMLMKSAQ	352	4	QQP19701.1 | olfactory receptor 6 [Tropidothorax elegans]	2e-103	39.95	7tm_6	IPR004117: Olfactory receptor, insect	6.465	4.664	3.367	1.803	1.793	2.933
RpedOR144	Rp.chr3.2469	MPLDGNVSKWKKILLTYYPMLMPVFLLWKVTCAALSMFSNDFEDMMLAQNVSGHMSTGMLLCLFYIFWRQEFRSMIANFDELTEKVTKNSFGKEKFFAELYKKDSGTLCTMNNILCTSSAMLPFIYCCSAPISAYFEGTYGQNLPMPVNCYFELHTPGTFEIFSFLQFVGNASAALHKLATEFTLFGMLKLLTAYFKYLSESIKEIGKEISIRPHSNIIEKKFHWIEIHQGAIKNAQNLQALFSPVITLYFLSMVGVVACGIFFQLNASETNQAQGSSLGMYMVITIVQFYLLCYMSDELCEEVRIHNVRRLTQSSSIKFVISSANVAVTGRQRCNGSLLHPVVHARLQS	350	5	QQP19776.1 | olfactory receptor 81 [Tropidothorax elegans]	3e-64	38.61	7tm_6	IPR004117: Olfactory receptor, insect	13.445	7.818	6.374	8.262	10.069	8.722
RpedOR145	Rp.chr1.0409	MEKTLEITGLSLSPWNKNKFFNLITLITFTLFAYDFFIVNYFSFEEHTVMERIENLQYVVSVIHLITKSLNFRLRTKLFWRTVVKGKDLWELMREDERNAKTLQQISASRRKINFVLFFLYVTPCLVSVVASLVRNSMTDRSQWKSLFCLWSPLRAVLGDDYYWSIWTVEFLEMLVALWMFSVVNVPMVVCSLVAKANLVGLARMLSSRNLHVRECVIMHQKIISYVRDVKEMFSGQMALEVLCSAIQLSPRGFLLVSDFKNRDSHVIEAALFTIATIQATVVICYCGHVITKTSEDVLAASYQNQWYNLNNPEKKMLNILMLQASRPLDLEYAHLVGFNMEQLARVNIL	350	6	AXX83053.1 | odorant receptor [Yemma signatus]	5e-52	37.16	7tm_6	IPR004117: Olfactory receptor, insect	0.551	0.869	1.992	2.015	4.659	3.335
RpedOR146	Rp.chr5.1612	MQKMLSYTFMFFLAPALICAEIQFIKQAFLSKDIMLALQTLNMLGSAIQFYGTSLIFIFYRKSLERTISLIENLTEEIMTEGGGLARREIQQRRKFGLKVHKIFVGTYIFLQSWSIQPMLNFFLYDIRGYAVNSWLPFEKKSIAGYLSNFFLQSSTCCCYCMGYCMFGSLLVAVCELLFGHVDILRQRLENIKFGTSKTVDELVKCIKYHGDIIQICQELQNLTAAPLIFNCIFTVIVLCIILVNITTADVNVDVLNLIIEAQLVLLFLGTYCWYGNEITSRFSQLLVPTYMSDWYNGSQAEKKLALNIMTRTMTAMYFGGFIRIDILTFVNILKGAFSFYNVINVIKE	349	7	QQP19725.1 | olfactory receptor 30 [Tropidothorax elegans]	2e-80	41.67	7tm_6	IPR004117: Olfactory receptor, insect	0	0.474	0.181	0.367	2.736	1.984
RpedOR147	Rp.chr1.4276	MDKLLRPERRAIEANSLTASLEWNHWYRISSKHAKSLKETNRMLISGIFDYEDEEIDENQSNMKEEIDAEIRKTCDLAVIVFGSGAVWGVIVFPLTQLVLHDGSFEGTILNPYLPPFFFYLPFDTRTPSGYCLAYLIIALAVIVVYSECISSLIVFLQTTIHLRGQLQILNYSMEHLHSRAYSKFKMMELKKNDLQKVLLQKVDFQTCIYSCFKENVRHHQTLLRFKACIQPFNGACLLDCYVVIALIYAALFYMILQTIPLGFLINFIEMLLTEQSAVFLMCYIGETITEEHGRLFETLYSLEWIGYSKKVTNEFRIMMSNTVKPVYIEALLLECPASLKSYGEVGRI	349	5	QQP19760.1 | olfactory receptor 65 [Tropidothorax elegans]	3e-42	31.48	7tm_6	IPR004117: Olfactory receptor, insect	2.431	4.007	2.197	10.71	9.495	15.821
RpedOR148	Rp.chr2.2359	MLISLFVFTDDKDKFATVAHHLMFAIDMIGGVSTYTYYRDILVELVEEVNSSYDYYSEITAQLIKEIEKKRRRDIDLIFKLIFRSSVYAVCNIILAAYFEKYITGAKVLLPFPLWFPFDLDSMINYLMAFSLQFTAVVIAVLVVFGSLAFIYIVYNHVTSELQLLKFAIAKTFERAEEMVKNDKQGDLTIEEAYVISVRHCGAHHAEILTYFDNANKPLQFVYIFTFGTGLGLLVSSGFAFLSDNTVLKIKFLSLSVLQLVFIFLGCWIGEEIGAQSEDIRGAIYDIAWYDLPKECHSTFFIMVERAKRPLIFTTPVGMGANLLTYMSVNTRLDTNFIFVWIKKFEP	347	5	AXX83035.1 | odorant receptor [Yemma signatus]	3e-61	37.05	7tm_6	IPR004117: Olfactory receptor, insect	3.223	1.051	3.214	4.471	1.667	3.105
RpedOR149	Rp.chr4.0970	MLSAVIVVPAFNFYYRNNYTAAVEFLKKGFDKYLNEKPDTEHMKFKRQRVRQVRQWSFIFGVLAYLVAIFYIIQPLFKYIFVNVDEENSFEAINPYLPLPLCMLFNTKNSIGYTLAFLSYVIYLFLLYTILVCFLETFLSSSLQLLAQIEILNYSLLNIHSRAKSKCYFYAGFSNRPNNPLDPEEELELQKSLYLCLRTSLQHHQAILRYYKEVKEYLGAMNTFSLLIFAFLFASSMVPVIQNPLGNMALIIQLIMDLTGYFQLFLVGQIISDKSFDTINMLYSTPWTKSNKNYRIMLNLMLTIAKNPIILRAPFLNADWTLETFGVMLSGAYKLVNLMLSTV	343	5	QQP19727.1 | olfactory receptor 32 [Tropidothorax elegans]	1e-56	36.14	7tm_6	IPR004117: Olfactory receptor, insect	0	1.064	0.203	1.645	2.147	2.225
RpedOR150	Rp.chr5.2090	MWDWRQLRWLNYVGWWPRASKTKLGYKLSRTLGIILFLSDFIQVGPEFISLFTEISSGSLALIIPNLTTTAMGVFCALKISKILLNEDNISDIIRRLEEMDERARMVLDTNIIESHTKKRTTVCEISTYLLLIDLVSIFSWSWRPLYLAYHGEKELIITSWIPWAWDATWLSWFVVYVMQSVHVSTAIYGICIYDVLAYCLFEMWLLQVDFLKEAFSNLDFTPPSSTLRFCVRFHQEIRLVMRKINDFVKHAILFQSVFATLVICLTMFESSSNDEIFRATFNNNWYIGTIKDQKSILMITEQCKVKDYFGYIVHSNLETFIAIIKTSFTYFNFLKAVSLE	341	7	AXX83045.1 | odorant receptor [Yemma signatus]	3e-86	38.32	7tm_6	IPR004117: Olfactory receptor, insect	0	4.279	2.044	1.654	4.473	3.949
RpedOR151	Rp.chr1.1162	MIIMGYVLVSRVRFARFHKIIHGGVYDYNEDNGEVFTSFNDEIKKEWRRSLLIPAGVGVTAIGAIMVGPILDKYGTFNPDDTDDKTVKYNLPVPAYYPYDTSDLFAAFMTSFIQVLTGGIVGLVMCAGCLGYICLTQTLAREFRILIHAVENLEQRATLLHIRRYGAKPVGNGFTKFQNEAFSNCFNACYKKLHEHHLNIIKVGEDVSHILGFPNLVAFSLGPVVIALALLATTISGGQLPGTTFSALLFCLIEVVYMFIFSSLGQRLTDLSEDFWRKLYDVKWYNCRKNVLVNYTIFQVCTREPYVLYAPFGSMPSNLETFSGLMNSAYSFYNLMLAAT	340	5	AXX83034.1 | odorant receptor [Yemma signatus]	3e-70	36.45	7tm_6	IPR004117: Olfactory receptor, insect	10.776	7.689	12.301	18.667	21.348	14.919
RpedOR152	Rp.chr2.1057	MTYTIQIFFLIQLCMVFTVGFNVKRMEFRILHREMVGEVYDYGETIMDIMDRLRDEMWKERRYLFVLPIVLIIVGSNVMFIAPVVDRLYGTVGFNVTEYSVNMDVPVPGVYPIATDTPYAFYILSCFQCITAMFVVSSVGSASIIFMSMFQNFALHLKFLNFAVNNLETRAEEEFVRLYGNVLKNGKATKYQDKRFQMCYAGCLKKCIRHHQLILRWSNCLNSMFSVPLGLSYGTGTVVIALSLLSVKTGTSLPGTAVTSSMMCLLEVGFMALLSVLGQKVVDLSEDLRMSMYSVKWYFCNESTKLSMRIFQEMSLRPLQLSGFGLVKADLDTFANVS	338	4	AXX83004.1 | odorant receptor [Yemma signatus]	3e-97	45.91	7tm_6	IPR004117: Olfactory receptor, insect	1.712	1.439	1.031	2.921	2.023	5.578
RpedOR153	Rp.chr5.1486	MSRWTAFQMCVIIFSVWKFAFEDHPFFDKGLSLEAMCSTTYLATKIVNVKIRMKKFWQIMIDAENILNEMTSLGKYQQMLEKRRAQVTRLIRIIMMIYIVPNSLTVTLSLPSNMMKDDDKKELIYKIWDPFRDSLGEDYFWARYTYEAIFVGWTLLLFGVAISMLIYCSHMACIMMDVFILMLEEKTIDVPKCVLVHQKILKFVHDLNDYYSGLLLIELIFSAIVISLRVYVVFLMWKGGDERVIGEMTYIVIVMLDPFMICYNGQIIMDRSENVFKSCYQNCWYDLSTKDQKALNLMMCRASRTLHLRYRRIMTFDMIRYGTVLQGTYSYITILLQV	338	6	QQP19742.1 | olfactory receptor 47 [Tropidothorax elegans]	7e-72	36.83	7tm_6	IPR004117: Olfactory receptor, insect	0	1.259	1.65	3.13	5.291	4.383
RpedOR154	Rp.chr1.3060	MKPVKETPELNMFIRMLKLTGLWFFSREPYSLFKCFQYGRLLSYLLTVVLWNYSLFLIDIHEIPKKPYTPIVIWSNFHFITVVYVFIKSRDLEIFTSGMRELLAKRRSKWEMELFDKYTSQTWKFITFSFGHVGIILLVISFFPTICDLLFLIFSESEDPFYIPMTLEGFLPRKKSRSFLFYALNITNGLLVITPSIYYVALLTALPATVTYIYYELEVFKRKMKIWSESKSTNLERRTYLRNIINEHNELLRLIKLVKGILGPSFSLQNFVTSINTGFMLHAGKKMTPTGRTSALCSGWRCWAANSELLLDGLPYRSGNGSYGQAMHHPWLYQLFT	337	3	QQP19726.1 | olfactory receptor 31 [Tropidothorax elegans]	2e-46	33.1	7tm_6	IPR004117: Olfactory receptor, insect	2.403	1.985	2.689	3.139	2.809	2.131
RpedOR155	Rp.chr4.0581	MILYTLYLVSADKLTAAGVLHVYAVSSWLLWITASRTATDRSLNKMREMINSGFFTYVEEELDEVQVAKLNSISDEIKWRSDKFLIMCILGVFFGMVVFPATTYFINEAMEEDQIINPYLPLPIYYPFSTETALGFSVAYLVDIMFWTYDYSTAVVSNELLINSTVHLKVHFSVLNYSIANIQRRAYKLFAKRYFHEVREASLDQLMETKDFRHCLITCLKANVQHHQAILRFKNICQPYNGLAILNLVTVTTVIYGALLYLLLQSKDLFESLYRSSWIECNKEFKQTLHIMMSNTIKPMMISAYLLDFSASLKSFSELQSAVYKITNLWRQSDKLS	337	5	QQP19764.1 | olfactory receptor 69 [Tropidothorax elegans]	2e-54	32.24	7tm_6	IPR004117: Olfactory receptor, insect	0	5.954	2.896	3.976	5.618	5.727
RpedOR156	Rp.chr1.0343	MGFTAAVLTADDLALSLQCAHTAIVDFELLLNQGIRFTPMFRRLFRTAEILKSGVYTYKEDVLNGEYMEIKRKYIVEIRKTRSMLRNLLISVFFSSVLIVPIMNCIIMDVDASKEIINPYLPSFSIYYPFNTTTFVGYTCAYIFIVVAYLTVVLPILVVINSIYISCTLQLKAQYHILNHSLKHIETRAYSDFLRIETSEKKRFLSDDLYYSKEFLNSLKTCFRSNIIHHQNLMELKKSFDGFAGVTLFLIIALISLIMAVNVLIILQSSETYDILYSTPWYNCDNTFKKYLSIAISNTRKPVTLKTALIELPASMDTFGMIISTMYKITNVITKT	336	4	QQP19780.1 | olfactory receptor 85 [Tropidothorax elegans]	8e-57	32.72	7tm_6	IPR004117: Olfactory receptor, insect	1.722	2.352	1.245	4.407	5.165	6.012
RpedOR157	Rp.chr1.1253	MLCRCVVDESLNRTRDLLNSGIYEYEDEQPDDHVLKMKRDSQLVVKQRANTNALIFSLSGISNTFVYPLTQLIAPPEDDGNSPINPYLPHPFYMPFNTRTVTGYAGGFLLNGLFMVCVYSFVICSNDIYTRCTGTLKVQLEILNYSLMNIKRRALTMLQKRKAVPITEMSDEELLAREDFQKCLQICLRSNIKHHLAIMRFRKAFHKYTGSVLLEVCTVTGGIVGTIMSLLLQNPPLNSAINYILTLLAEIGYPLYLCYCGEDVLQESGKVFETLYVTPWIYCDSRFRRMLLIMMSNTKTPLKIKTIAFDLSASLETFGGVMSGMYKIVNLIRQ	334	5	QQP19768.1 | olfactory receptor 73 [Tropidothorax elegans]	8e-89	42.51	7tm_6	IPR004117: Olfactory receptor, insect	13.856	10.739	8.556	12.457	29.761	27.012
RpedOR158	Rp.chr3.2408	MSLCLVLYCLSIFGNCTRSSHSAALKQFKTGVFLYERDSAKISQIKKRYIELFRKLVPLLYSPILAFAVLKTFLSPILHLLSAKSEIGDESLNPYLPMKQYVPFNTRTPLGFGVAFFLQAMFFFFLDVTLTCHVETYVGSAMQFTAQLEILSYTLKTIEKRAQNILTKQETRTTNQKDYKPDYESCLLFCLKENILHHHAILRLSKDVSPYIEWTSSLGILFFSVLLAAAATIALKDPAGNVELIFFVILTLIGYFTMCGVGQMITDMSSEVSDTLYTIPWPVCGKKFRVILSIMMANTRNPIVLHSKGFGNNISLENFANRALVPAEVRN	331	5	QQP19727.1 | olfactory receptor 32 [Tropidothorax elegans]	6e-39	35.71	7tm_6	IPR004117: Olfactory receptor, insect	4.194	2.571	1.474	4.261	7.309	5.289
RpedOR159	Rp.chr4.1060	MQMRDNINSGIYVYDLEELEDEQITKLNGIEYEIKKRSDKFLYICILGSILGAAVFPLYDYLTSDPDASLEDELLNPYLPLPIYYPFNTDSFNGFVAAFVVDMIYWFYDYSTAIASNGIIISSTVHLKVHFDVLNYSIRNIHRRAYRLFAQKNLNELNVSSMDELVEREDFRKCLKRCFKANIQHHQAILRFKSTCQPYNGVALLNMVTVVAVIYALMFFLLLQDLPLSGKIKIVIALLMEQSYALLLCFIGEEVTTKSDDLFGALYSTPWLHYDEDFKKNVHIMMSNTIKPMLINAYFIDFSASFKSLSELQSSAYKVMSLWRQSETIS	330	5	QQP19764.1 | olfactory receptor 69 [Tropidothorax elegans]	2e-49	32.3	7tm_6	IPR004117: Olfactory receptor, insect	0	9.211	4.435	17.522	18.327	16.458
RpedOR160	Rp.chr4.1316	MREMINSGIYIYEKEELETDQIKILEEIATDIRRKSSRFIAIYVFGFISVMLMFPLATYMMKKETSSDEDQLVNPYLPHPCYYPFPTDTVAGFSAAYILDFIYWIYVYVTAAIHNGLIIFSTVHLRAHFTLLNYSVSNIQKRIYRLYNKIYGDEIEGASLEELIGTKKFRHCMKLCLDANVQHHQALIRFKNICQPFNGLSLLNMFTVVVVIYAAMLYLLLQNIPFATKIKYAGTFFAENTYALYICTFGQEVATESGELIEALYGTSWMNYDKDFKQTLHIMMSNSRKPMEIKAMLLDLSATLQSYSVLLSAMYKVLSLWRQSDKIK	328	5	QQP19764.1 | olfactory receptor 69 [Tropidothorax elegans]	9e-62	35.6	7tm_6	IPR004117: Olfactory receptor, insect	0	9.823	3.612	2.58	9.78	12.042
RpedOR161	Rp.chr1.0945	MKMRDIIRAGIYNYEDEELEHEQLEKLRGIKKDVLRKSNSFVYLIFGNLFFIAIIIPLCQYFFVGDNKSEYLVNPYLPHPVYYPFNTETVSGFAMAFFVDIIYWIYLYSTAVLSNDFLLYSTVYLKVHFFILNYSIRNIHRRAYRRFAKTNYHHIEEASLDELKQRKDFQICLRTCLKANVQHHQALIRFKNLCQPYNGFSLLLLTTVVAIIYATILFLLFQNISLIMNIKCAGTFLVEQNYAFLICFYGQEATSESGAVFESLYSTSWMYYDKDFKQILHIMMSNSISPMRIKAHLLDFTATLSSFSDLESGVYKIMSIWRQSDKLK	328	5	QQP19760.1 | olfactory receptor 65 [Tropidothorax elegans]	4e-58	34.57	7tm_6	IPR004117: Olfactory receptor, insect	1.764	1.483	0.212	0.86	1.443	1.642
RpedOR162	Rp.chr5.0883	MWTGFPDIGVHSKSSSQKRRVLLGVVPDSKMTRLHFYTSFRRIFKYGYISGMPLPSEQDPDRFLSLKEILCLAYLLSKVICLAFASGETEVFAVKVIVISVGVYIFFGLFDGLFFYISRTNFLGLLSDLDEVNQRIIDFGHHENFVKQWKENEERVNKFADFMAVITFLCAVSYTISTPVLDYFEGNYGQYPYSLKAECKPALALARVPWLFEVLVLQEAETRNLFQTISGSTYMCLSMFQLFLMANATDEVKDMSEGIAFDIYSIPWYEMKAKDRNYIKIVMVISNYSVYVEAYKAQSFRINRETYLKLFMSTVSAYIGLQKLIAQE	328	6	AXX83024.1 | odorant receptor [Yemma signatus]	4e-16	33.93	—	—	0	1.112	0.425	1.935	0.962	1.779
RpedOR163	Rp.chr3.2410	MSLSLAVMGLSTFGNCTRSNHSGALKEFKSGVFLYEGETSKISQIKKRYVDLFRKLVPLLYTPIMAFAFLKTFLSPILHLISAKSEIGDETLNPYLPMKQYVPFNTRTPIGFGVAFFLQAMFFFFLDVTFTCHVETYVGLAMQFTAQLEILSYTLKTIEKRAQNILKKMETRTTNQMDYKPDYENCLLFCLKENILHHQAILRLSKDVSPYIEWTGSMGIVFFSVLLAGAATLALKDPAGNIELIFFVILALIGYITMCGVGQMITDMSCEVRDTLYTIPWPVCGKKFRVILSIMMANTKNPIVLHAKGFGNDISLENFADVSHHSE	327	4	QQP19727.1 | olfactory receptor 32 [Tropidothorax elegans]	2e-54	38.11	7tm_6	IPR004117: Olfactory receptor, insect	1.415	0.372	0	0.863	1.769	2.196
RpedOR164	Rp.chr3.2601	MGKGLEKEKPFDFLRTLLIITGVIEFPYGPWENIMTCITLLSQSYLLVAAFIFLYEEHPFSEKIQAFLIFSCNIPLFSKALVLPTRRTWIKQLMTSLEQMEEESSLQSEFREKSRRNLFFSKLVAWGCIGSFTFLHFGAALVSIIKHLNGVDSMPFTVYTPFPKYEYFYLTCVYVYVICIMPIMVLGMANGLLCSFTLNISMQMSYLMSNLEKVGLRPSKKDEDADVNYCIRLHQKILRVTQNLNDLCSDLIYLEYLISSLQCCIGGYQLIIGKANNDPGVPLYLLTFLLTLVIPVLFSICGNEIKLQMLKSAYSLIAVIQTMDSS	326	6	AXX83006.1 | odorant receptor [Yemma signatus]	4e-57	42.81	7tm_6	IPR004117: Olfactory receptor, insect	4.495	5.035	5.559	7.354	8.55	8.949
RpedOR165	Rp.chr3.2908	MLYSLYLKGPSFLLTPTAVFIPIGLNVIATSGVVVANMRSLETLVAESERNICSYRDEWEKEVIRAHTQLLCKVANLILYGLAAFGITYILLPFLIDAVLAFPQPYAMPLPFDGYFSLNKSRNIDFYAVVISSDLWFLFAVPNTAAFECLLFFIISYTASEIDILIKHLRMKILRSPDDKETTSKDWSLRDMIKKHQQIVSTTIYADCSLEYSSMCLTDSSMEYSSMRLTDNLQEYSSMCITDRTLEYSSMSLTDRSLEYSSMCLTDNSQEYSSMSLTDSSLEYSSMSLTDSSLEYSSMCLTDRSLDFSPMIHADNSRRYRSMWPY	326	2	QQP19701.1 | olfactory receptor 6 [Tropidothorax elegans]	6e-57	44.39	—	—	0	0	0	0	0	0
RpedOR166	Rp.chr1.4278	MKARVKVYPNGGALEISIDGRSPRARKCRMYGSHIELSIDTGDARPISRGPYRVPVHLRKEMEQQIPPQQGSHCALKFTLFGHSNAPTAIQFFNIYGRMVLVVPDKILIVLAAHIIFIAIFCGNLTISRLVTERSLKETNRMLISGIFDYEDEEIDENQSNMKEEIDAEIRKSCDFIAYVFGSGAISNLIVFPLTQLILHDGSYQEGILNPYLPPFFFYIPFDTRTPSGYCLAYLIVAVSTTILYSECITSLIMYIQSSLHLKGHLQILNYSMENLLSRAYSKFKKMELKKKCSQDVLLQNEDYRNCIYSCFRDNVRHHQTLLR	324	3	UQZ09844.1 | olfactory receptor 97 [Tropidothorax elegans]	6e-19	30.32	7tm_6	IPR004117: Olfactory receptor, insect	0.238	0	0.215	0.653	1.461	1.247
RpedOR167	Rp.chr3.0802	MVHKQNILKVNKTLSTWWKHRLMEKETETLKKKTEEFLDMASYYYCVGMYSGFIGFVTLPLGKFIISQTDLEPVDLLVFPCWSPVSLESWWVFVSAYIFEVFIMALVFVLFMRLQIYCISVTMFIGYQEQLLGKAFLTIEERIEKIMKTKLFGTKEDWNKEYMQELKLEIKSCVQHYQSLMKCSELLSNIYIIPTSTNNYVGKWVLCLLGVQIAFGYTEENFLAIQAGVFLTSGIFTLLLFSLISEILITEAENLRLKLYCSPWFNMPLSCQKSYNIFQIMFIKVPTLKTLMGQETSVENFSNVINGAYCYFSLIIAMMTKS	322	6	QQP19783.1 | olfactory receptor 88 [Tropidothorax elegans]	2e-65	40.44	7tm_6	IPR004117: Olfactory receptor, insect	4.191	1.51	2.597	4.16	13.392	4.46
RpedOR168	Rp.chr1.4270	MIISGIYNYEDEEIDEHQSNMKEEIDKEIRRTCDLMVLVFGSGSISNFVVFPLTQLMFYDDSLDRSILNPYLPPFFFYMPFNTRTPGGYCLAFCLTALLAASIYAIAIGFMLIYFQCSVHLKGQLKILNYSLKNLHRRALSKYKKERLINDCSPDKLLGEIGFQTCLHSCFKANVKHHQALLRFKTYLQPFNGACLFDCYIMIALIYAALFYMILQNLPITFLINFVEMLFSEQCGLFLICLLGETITEESGKLFETLYDIEWTGCNKKVTNSCRIMMSNTLKPLYIKALFIDSKASLASYGEFMMGMYKIMNLMRQSDAVR	322	5	QQP19760.1 | olfactory receptor 65 [Tropidothorax elegans]	1e-48	33.54	7tm_6	IPR004117: Olfactory receptor, insect	16.406	7.174	2.597	8.978	20.088	21.465
RpedOR169	Rp.chr2.2422	MPVKRRLKQGSDDISKELQPQVECEQLEPRVFPRRFKGKWYYYPYLAYTALTELICITNLLTIGLRFVSPGINVVDRCCTGFAVTSISLSTFRVFYLFFRRPRFYRIMEEYNALYKDSPELNEDIAKIGTVIRYIPRLLGLLTALPMGPWCFMPILDAMMGNKWVVSVPSIWPFDPVASIYTFVLVAALQSLSAGINTLRIVLFDNMFYCYVGRQLALTRHLRRELARILSVPHLDSKGNEKFIESNGIEMDKGKASSTMKKELKQWVINHQHSLRLVNELQDLFSPWLLCQYSLISISCCTTAFVVVFVSMIITPLIFY	320	5	QQP19717.1 | olfactory receptor 22 [Tropidothorax elegans]	2e-89	55.64	7tm_6	IPR004117: Olfactory receptor, insect	3.664	4.012	1.104	1.675	1.527	2.014
RpedOR170	Rp.chr3.2468	MIIYSVWSRGLERLIELVDNTCRLVADSDLGKEKFFVKTYAVDSAMLEMLNKLMCISTLITPFVFCISTPLLEYFAGTYGTHMPAAVSCSFEMEPGRYEIFLFFQYVGLFVPAFHKLGNEFIMFALIRIQSAYFKYLAESIKHLGYQMRETNIDASRKILKWIKIHQESIRNVQQFQWWFSGIVIVYYVTMIAITTGATVHLVNADSSNFLQSGTSAIYQTITIGQFYIMCHLADELGEQMDKVATEIYCFPWYMLRKKEKSFFCMMINIANKPMTLTAYKAPAFSINRESFQTFIVNLVSAYMAFLKIKEIEDESSTQ	319	6	QQP19776.1 | olfactory receptor 81 [Tropidothorax elegans]	2e-73	36.71	7tm_6	IPR004117: Olfactory receptor, insect	21.376	7.802	3.806	8.857	20.248	17.281
RpedOR171	Rp.chr2.1058	MIGTVFNYEEETMDIMTNLKDDMMKEKKQLLALPFMLSLVGSNCVVIGPLLDNNYGTLGFNISETPLYMDTPIPAVYPFPTTGPHMFYILCFLQVLSALFVIFTIGAAALLFINLVQYFILHQKLLLVAVQNIETRAENVFTNEFGNLMWKGMTKHFYEDRRFQKCYAMCLRKCFHHHQLILRWYHSLHDLLSLPLGISYATGTVVIALSLLSVKTGTSLPGTAITSFMMCILEVGFMALISVLGQRVVDLVSIFGFSRFYNNIFLNYVIALGKESRIEMFVAASEGILKAPSSGIIMCSTLLPLDHLAEEWNDPRQ	317	4	AXX83009.1 | odorant receptor [Yemma signatus]	4e-70	46.27	7tm_6	IPR004117: Olfactory receptor, insect	8.636	8.629	12.751	5.783	13.602	8.07
RpedOR172	Rp.chr1.4002	MTGLFFVWGSITRYVTVTSVERARDMILSGFFAYEGEEKDEHIEKLLRDGIKSLRKSCNIVMYVMLTGIATNLIMFPMSQYSNVPNEKYEQVVDIASPYLPHSIHTPFSTRTLPGFMVAYLQNALFQLGINGITVTMNEIYVGTWGQLKLQLDVLNYSLRNIQNRAASLYFKRRPSVSSQSARLQDLWDDPEYQKCLVKCLRSNILHHLVLLRFKNNLAAYCGSSLLIVVLIAGLTFATSLAQVMISSDLFESLYATPWFNCTKSWNKLLRIFMANTKEPMKVECLVLEVTASLEVYGTFLSTMYKIVNILRTM	314	4	QQP19728.1 | olfactory receptor 33 [Tropidothorax elegans]	9e-60	33.62	—	IPR004117: Olfactory receptor, insect	9.578	4.84	2.441	1.796	8.875	2.287
RpedOR173	Rp.chr2.1323	MLFKIIGINIEDAPVGRIGQAVIVFLTFTAMFLMVYQYIISLILGILWLSKDYEMRENLIVLCSIVFGIVTVLKYILFQRKRKVLVQLIKQLKGLWTLGSTLRLAGLSEEEKYSEISKSKVLILTNYKDGELVQSCVDEHIHLLKLRNEIGDMLNESFLYQTITSMAVLMVVFYVFTNSDTLVEDSVGFAGVAVVEMVQVLTSCLSGELLKSRSEAIHFAVYNSRWYDCDPNLKTSLLIMATYATREVDLKGSYVFNLSFATYETKGQKNHNPEPSICCNVLNGIPARHQSNPRHSMAEQGLRDAREPHSSM	312	7	KAE8573746.1 | Odorant receptor 140 [Halyomorpha halys]	3e-47	49.18	7tm_6	IPR004117: Olfactory receptor, insect	0	0	0.223	2.938	2.022	2.301
RpedOR174	Rp.chr3.2409	MYAVESLHNMSLCLAILSISVLANSTRSSRTAALKQFKTGVFLYDRETAKISQIKKRYVDLFRKIVPLLYAPILAFAFLKTFLSPILHLFSVKSEIGDESLNPYLPMKQYVPFNTRTPIGFGVAFFLHAMFFFSMEVAVTCHLETFVSCAMQFTAQLEILNYTLKTIEKRAQYILRKQETRMVKQSDYKPDYESCLLFCLKENILHHHAILRLSKDVKPYIEWTSSVGVVFFSILLAAAATLALKSCEVRDNLYTIPWPICGKKFRVILSIMMANTKNPIVLHAKGFGNDISLENFAHMTSLAYRIVNVLR	311	4	QQP19727.1 | olfactory receptor 32 [Tropidothorax elegans]	3e-51	35.37	—	IPR004117: Olfactory receptor, insect	7.563	4.495	4.033	3.627	5.748	5.916
RpedOR175	Rp.chr5.0884	MTDLHYYKSFRRIIKYGDVCGMPIPSKEKLNRFLTLKEILCMTYLLTKIVCSAFAVPETEEFAVKVIVISTAVYIFFGFFSGLFFYFCGKKFLSLLDDFDSVNQRILDLGHYEGFLREYKESGKRMQRFTSIMTVVIFIAAATFTTSIPILDYLDGNYGRNPWPIKAQCKPAQALGKIRWLFEVIVIEEAEAPNVFQSISGSTYMSISMLQLFLLSNATDKVKDVSERIAFDIYSIPWYEMSIKDRNYVRLVINIANYRVFVEGYKTPSFRINRETYLNIFVSTVSAYIGLKKLIEINDTGLTEEQVI	308	6	QQP19762.1 | olfactory receptor 67 [Tropidothorax elegans]	4e-16	39.09	7tm_6	IPR004117: Olfactory receptor, insect	0	4.341	1.131	2.976	9.731	11.219
RpedOR176	Rp.chr1.1243	MPFTKTAKELRETHIESMDEILETEVEEDTYHDFINYRKWLKLISGHKIGRNIINIVYVGLLFILFIYFLVMSATAVFISRSDTVMFFHSLHTFLLVVMPLSSLTNRYFSDSVLNATAMTLKAGVYIYKDDPLIEDYNEIKRKTVNQIKKISKLFSTSLIVGVTSNTVFLPLIQLLVIDEDVTGKPMNPYLPQPFYMPFDSWTIQGYIIAYTINVVYITYLAMIVACTDEFFVSITLQLKAQLQILNYSLLHIEKRAYWKINKRYLEYGHFKEDLYKTPDFRKSMSICLRSSIQHHQAILR	301	1	QQP19780.1 | olfactory receptor 85 [Tropidothorax elegans]	7e-61	38.36	7tm_6	IPR004117: Olfactory receptor, insect	1.025	0.404	0.926	1.171	3.493	2.534
RpedOR177	Rp.chr1.4257	MLFLLSTNTTRRSSGKTGTTLVYFFHCRSLNQTKQIFQAGIFSYGEEEADEEELRIWDNILPEISTKFNFFLILCLSGIVSNQLIHPLSQYFSVTEEDYITEEDWMNPYLPHFLYLPFNTRTTLGYIAAHLLDTIGYSCLYMTTLSMAYIYISCEVHVKTHLQVLSHSLKNIKSRAFVKYRKNGIKRELAEMNEDELFKNALFQSCLYSCLNSNIQHHQALLRLMKQVQPFIGSTVFVFFLVSAMIYACELYLIFQSPRMNLMINYVLTFCAETTYAYQICVFGEEMIEEVCKKDCAILQV	301	3	QQP19760.1 | olfactory receptor 65 [Tropidothorax elegans]	5e-50	35.74	7tm_6	IPR004117: Olfactory receptor, insect	13.064	9.288	3.472	6.792	21.834	24.448
RpedOR178	Rp.chr5.1920	MDWEKLDPLEKQKYYEKGYSDLKFFLLRNGGMFRTKIRDNSIWSRLWNYNPIIQICVYMADIPLLVYSLYTERHNVDNFLESAHFLVMIWSLMVGNMDFLYYREDLNILLRYVGTEFYQYDEKEPQLYKNMKKATIQEIKKISIIGSLMYISMGVVISVLQPYIYYLSTKDHMEIKPINPYLPVYMYIPWDTYTIKGYIAAYTLQSLGTAFVVLNVIANGFSYVNLIIMLRCQLEILNHSVLNIESRAVERFRKRNGIKPDGAMMRNRRAFDEEMKQCLCDCLKQNIKHHQCLIR	295	3	QQP19713.1 | olfactory receptor 18 [Tropidothorax elegans]	6e-108	51.19	7tm_6	IPR004117: Olfactory receptor, insect	0	3.296	1.653	3.584	4.99	6.996
RpedOR179	Rp.chr3.2482	MKLIHEKEGPATKEPLLHFYDFLAKKKWPMLCSGLAITEKSTFWTKLNKLYVCCILAFLCYNMTLTGGAVLLSLDDKVAMTVAAHFFLLTVLLICSITIRIFYNSAHKAASESIRQGIYQYEFEGPEITKMRKNGVGFIRKVNTFITISLVVGITISFIGNPIARLMVSDEESWRKTINPNLPIPVYIPFGADTTSGFYIAWVILVLFGSYFTCGIISLNDIYVSCAIQLRTQLEILNYSIETIEKRALIKLVNNVSISYNTARLNEFYGRSDFQKYLYLCLIEDIKHHQALVR	294	1	AXX83011.1 | odorant receptor [Yemma signatus]	4e-34	32.49	7tm_6	IPR004117: Olfactory receptor, insect	0.262	1.034	0	0.719	0.536	1.526
RpedOR180	Rp.chr3.2479	MEVGSEKEEPEIKERVLPFYDFLEEKRWLMFSAGFEITAKSTFWTRLNKLYVCCIVTFLCYNLTLTGGAVVLSMDDKVALTVAAHFFLLTILLMSAMFIKTFYNSAHKAASESIRQGIYKYEYEGPEISELRKNGVDYIRKMNTYLIISVIFSFSMSFIIIPCMRLFDSDEEKWRKTINPYLPIPVYISFGADTTSGFCIAWFILLVYGWYLMSGMISLNEYYVSNAVQLRSQLQILNYSIRTIEKRALTKLVNKHSTSYDATRVNELYETLDFQNCLYLCLIEDIKHHQALVR	294	1	AXX83011.1 | odorant receptor [Yemma signatus]	3e-38	34.78	—	—	1.967	1.034	0.948	2.158	3.397	5.341
RpedOR181	Rp.chr4.0971	MDDQQKTSANFDAIHDFMNERPLLKIIACYKVLNKSRLQFFFYIISMIWMFILYFYMLTMSVYTLSLPNTGLGFKVQICQVLSVMSMVFVVPTINYYYKNNYTAAVEFLKKGFDKYLIEKPDTEHMKFKKQRVHQVRQWSFIFGVLAYLVAIFHVIQPLFKYIFVNIDEENSYESINPYLPLPLYTLFNTNTSIGYTLAFLSNVIYLFLLYTILVCFIETFLSSTLQFLAQIEILNYSLLNIQSRARHTFHLDAAFSNQPNNSLSPEEEQELQKSLYICLRSSLQHHQAILR	292	1	QQP19727.1 | olfactory receptor 32 [Tropidothorax elegans]	2e-34	33.47	—	—	0	1.457	0	0.966	1.26	2.612
RpedOR182	Rp.chr4.2054	MSYNAFRKHRIVLGLLGITLPGYLKNKWFQWLLDIYLIFNICSMTLLAVLYVRGAVLYTHDRLLDRMTGLAAAISVLSALAKLITFRLNGGLLSYLINQLGHMKCSTKLGKRVRKVTTIFEMAVATIILTHNTDYWTHSEPTRQSPFFTESKTGEITEVTRDYFFILYGAVNILTTNVIGDTLFLILTSQVCYRLHRLANTIPFIGKEWVPGDVDVIDMEEKVTDQKLVRACVKEHNHVLKLTNDIEDLYYGIFVCQLVYSFLSICVTLFTVTQLCRETVSAYTIMYQFLT	291	4	XP_024219389.1 | odorant receptor 4-like [Halyomorpha halys]	3e-65	45.21	7tm_6	IPR004117: Olfactory receptor, insect	0	4.385	5.028	15.744	27.82	22.818
RpedOR183	Rp.chr3.0128	MDVGGEVATDYDTVHDFLNERLILKIMACVNVLRTTKLHYAVNMMFILCTFLLYVYMLAMCVYTLTIPNTGTAFKVEVVQILGDMSIVFAIPAFSFYYRANFEGAMSLLRMGMDKYTGERPEPQHSELKKHRVKQVRLWCFIFRVLCYQMTVFYALRSPATYFLGLEAEGLSRQINPYLPLPLYAPFDTNNIYGFAIAFLSNLMYLFLLYTVLTCLIETYLSSTLQLLAQIEIFNYSLMNIQNRANSKFKMGNKSEPISSSMEAEDKLEHQNSLYVCLKSSLQHHQAIIM	290	1	AXX83005.1 | odorant receptor [Yemma signatus]	5e-07	35.56	—	—	7.444	1.676	1.441	5.347	11.239	20.422
RpedOR184	Rp.chr3.2356	MNSAYFKDDFNTVHDFNSEHLSMMVVGCYVVLVKPFSYFLLNMIHMTSVLVVYIFLIIMGIITIASTGTEKVVIVQTMQALCLMFVGLALPGARLFTDDDMNIALKLIKKGVHDYPGEVPDEKHYEIKSEKVGEIRKIMYWVTKLTFFCAFSNTFVMPSMKYLTSEKNKTSGSVNPYLPLPIYMPFDTRTHLGFGAAFFMDGIFFFFLYATIACLIETYISCSLQLIAQLEILNHSLRNVLQRARLKLINEDDIHENTPLEILYERADFQKHLYNCLRENIIHHHVILR	289	1	QQP19727.1 | olfactory receptor 32 [Tropidothorax elegans]	3e-37	30.13	—	—	1.734	2.103	0.964	2.195	2.183	2.484
RpedOR185	Rp.chr4.1025	MSATSGNINAVTPYDVFVDSKWLFLLVGFTLLDKAYYSVYRMLLFLFNFYILCMSSYAMYLVMPNKNLAIDAFHVFLASIWLFWCFIARLLTASWLKEMREMTNGGIYHYRYEKLDEEQIGMHRSVKEDVRRKSRMIIWIYVTGIISVMIFFPFSEYLMNNESDSEKSEHIVSPYLPHLYYVPFDTRTPGGYAAAYFLDFLFWVITYVTAVSTNGIVISTTVQLKVQFRVLNYSLRNIEKRAYSIYAKRFDMSHDRASMEDLLKEEEFQKCLNLCLNSNVEHHLALLR	288	2	QQP19764.1 | olfactory receptor 69 [Tropidothorax elegans]	4e-43	32.13	7tm_6	IPR004117: Olfactory receptor, insect	0	1.477	0.968	1.958	0.73	2.181
RpedOR186	Rp.chr1.4275	MKSNTRNLGEKIGLYNHNHRWIQLIAGYGDSRKPVYILYIVFIYLLHVNALILAVWAVVLVIPDKILVVLASHIVLTTIFCSLLTASRLLAERSLKETNRMIMSGIFDYEDEELDENQSNMKKEIDAEIRKTCDLVVIVFGSGIISNFIVFPLTQLMLHDGSYQGSILNPYLPPFVIYLPFDTRTPIGYCVAYLYMALSGMIMYSEALSFLIMYLRTSLHLKGQLQILNYSMEHLLTRAYSKLKKMKLDKHYTQEVLLQKLEYQTCIYSCFRDNVRHHQTLLR	283	2	UQZ09844.1 | olfactory receptor 97 [Tropidothorax elegans]	2e-29	32.4	7tm_6	IPR004117: Olfactory receptor, insect	8.989	3.006	1.477	17.433	20.432	35.509
RpedOR187	Rp.chr4.2623	MPNKESQDVIHDFLEERKWLTFLAGYSDSSSVIYTLYRFVIVGLLLYMVAMTVLAGYLLPDKELIIVCIYAMLVEFYYIFWCLSMYLILMRSLRKFRTFLKSGIYRYEGEDEDDFLKMMKESLPKEIRRKSNLFSAVFNFTVIMNTTLFPLSQIALLGLSSDWEVMNPYLPHLFYQPFDTKTLVGAGIGWFLGVVYHLLMMVIECSVNWYYVSCVTQLTVHFRILNHSIANLQSRALAMYMKEQSLPVDISPVELLEDKNFQRCLYLCLRSNIQHHQALLR	281	4	QQP19768.1 | olfactory receptor 73 [Tropidothorax elegans]	4e-39	32.18	—	—	0	0.865	0	2.508	2.245	1.756
RpedOR188	Rp.chr5.1949	MNPGIYKSHLVSDYSSKMEAERSKNMTKVLKLIVGTQVTAVINLALAGVVDTYQRDLPYVLQYPCWFPFDLSYTPYSALAFLWQHISVDIASGTIFGCLALVYLTYCNLTTELVILRYAIEHIEDMAVELISEDDTMKNGNRRKRLTSDAYLQKGYITATRICAQHHTEIIEYFSNADDLFRVIYFIIFVTGFLGLICTGFALISSEDIRLAIYGSNWYDMPKECQTSLRLMMVRTMVPLQLTTLTGQRVDLDNFMSMVKASYSYFNTMLAIQES	275	4	QQP19767.1 | olfactory receptor 72 [Tropidothorax elegans]	8e-67	40.14	7tm_6	IPR004117: Olfactory receptor, insect	0	6.849	11.652	8.969	1.911	4.241
RpedOR189	Rp.chr4.2016	MAVEVVYTERFRKLLKDGGLWLNYSEHQYGNILKSIQIVRIAYLIFVYLLVLQKLLTEGSNFLFSRSASYIPLGATLMTMSLSFFAKSKNLELLADEHEINFSKYRNEWEMNIIKNICENLRKFVDFIKLSYTVFVALFVGIPWVIDGVLVVLGHEKPFIFAAPLPLEAYVACTTSRNLYMYSFALASHLWLLVGMSSAVTNQCIIFFSISYDTAEIRILKNHLNKLPFEIGFQSEESKIDQLPDWNLKKIIKYHQQIIRLVCLDRTFPFSL	272	1	AXX83066.1 | odorant receptor [Yemma signatus]	5e-53	36.15	7tm_6	IPR004117: Olfactory receptor, insect	0	0.447	1.793	1.036	2.125	0.825
RpedOR190	Rp.chr4.2704	MDSFHRLLMNAACRVAGDKQVELFTLHKALLPLLGYDWWDPPGYTIQWIFKRVVYPTSYFLLLTIVSILTFHKCFYLDTSKSLEFFIFMNNIICVFTFMFAALKTLYMRFGYGKEAKHLIKLLTAVGEFKTSARGWENSLKAFCYYFCLLSSIAGVWSSTFLLRYGCFPYETSYPWDQTTSLGYFSAFMVSFATAVYCSLIHSSVDTIISVSCGVIISHHATLKEYLHCIRQPANQDTVTLSLAIQLHEKLIEQKIYLELLEEPCQC	267	4	QQP19702.1 | olfactory receptor 7 [Tropidothorax elegans]	1e-77	46.25	—	—	0	1.593	1.304	0.792	0.59	3.024
RpedOR191	Rp.chr3.2471	MMLCQCVAMVTATGLVISYFYAVWRKSFVDLISNADDLTKNVLKSSFGKEQYFSELYLQDSRLLSSLSNLVCTMTGLCPFLHCISVPLSAYIVGTPVTDLPVPTNCSFELKINELYGMFVFLQFLGLATPAMQKLGNEFMMFSLYKIQSAYLKYLAKSLEDVEMSINTESKAVINRKLIRWIKLHQKAIQNIQQLQKAHSPVIVLYYLSLIGITSGGFFYQLNAEDANIMQEYSVGLYMTITIVQFFLLCHLAEEMATEVCSSSKL	266	4	QQP19710.1 | olfactory receptor 15 [Tropidothorax elegans]	3e-61	40.15	7tm_6	IPR004117: Olfactory receptor, insect	1.883	2.284	1.309	4.238	5.334	6.07
RpedOR192	Rp.chr3.2470	MDILSHDILASGLGMTDFFSGLYQRDASWITKFAVFLTPCTIICPLAFCASVPILGVIEGNYGERLPVYNRCPFETNDPGLYEYLIVQQVIIAPCLRSSNFVALANPKLLIEISLLYKKLDIDVHSALRNANALISFFSPVIILYYACLITTVAGSVFYQLNAKEPNVIQSNFLGIYMVVTIVYMYVQCHVADEMTTQALKLGEEVYAIPWYKMAPENRSFLRFIISVANRPLTVRSYRAQTFTLNKEAFKEVNEEGKFSL	261	5	QQP19710.1 | olfactory receptor 15 [Tropidothorax elegans]	5e-53	40.79	7tm_6	IPR004117: Olfactory receptor, insect	0.886	0.465	0	0.81	1.208	0.344
RpedOR193	Rp.chr4.2909	MFAKSGIMDSNDDILSERMWLVFIAGLSDSRSILYKIYRSLKDTGNVLRSGVFHYEDEEEDKELMIMKESLPKEIRRTSNIFICMFVSSGINSLILLPLAQMLLDPSHSSAVENPFQPNTEDETLLGTVIGWSIGAVIMFYIYAITCAVNWYYVNGVVQLKVHFRILNHSIANIQRRALSIYTKKRSIPISVNPEMLFGDDFFQSCLYMSFRSNVRHHQSLLRFVQVYYYKLKLISSICYLVRVV	245	2	QQP19760.1 | olfactory receptor 65 [Tropidothorax elegans]	4e-26	33.68	—	—	0	0	0	0.863	0.858	1.098
RpedOR194	Rp.chr3.2463	MAVPVYCNFEKGSSLLYEIFLFFQFLGLSIPGVQKLDNEYLMFGLIRVQSAIIKYLTESMKGIASEITHTNNHKTRKKLIKLAVIHQESLKIFEEFQSMFSSVVVVYYLSLICISSCGIFYQINADETNMVQTCTLGLYMIITIVQFFILCHLIDILAEDMDKLAIELYCIPWYLLDSEGRGIVRLMINIANRPTTLRAYRAPAFSVNREAFLAFIVNLVSAYMGFNKIRNIE	233	6	QQP19776.1 | olfactory receptor 81 [Tropidothorax elegans]	3e-60	41.63	7tm_6	IPR004117: Olfactory receptor, insect	7.769	7.818	5.677	9.37	6.537	9.235
RpedOR195	Rp.chr3.0452	MIKSGVYTYSTGLDEDSIAILEKGNGDIVRFIKTYFIVASSALFGSMLRDPIFGGTVHEEGSEVTIHKFYDTYIPFKVNTWARYVGVAIFHSTLGFSVVFGAVGNTASLVNCEIHIKTQLIVLKSPDSNLRSSLAFMFVVSAELGFVGSNCYFGQVIIDESSSIKEVVYNLPWYEQSNKICFLYKMILLRSEKPFIPSAFSLKSMSFATFGEILQTSYSWFNVIFAARGS	230	6	QQP19754.1 | olfactory receptor 59 [Tropidothorax elegans]	8e-35	44.38	7tm_6	IPR004117: Olfactory receptor, insect	0.67	0.264	0.605	0	0.685	0.974
RpedOR196	Rp.chr3.2458	MGTGHSAEDSFIRNNSINNSSRRNSSSSEPLLPRMEALRFSSSYRTVIVVGRSSGLPLPRDGNVSYLQRVGDTCYQILIALFVLSKLICASYAISQNEKFEDIIFGAATLMFTLTGASLTLFYAVYRKGFKALTDNMDSLCRLISESGLGREEFFRKLYQADAKRLSTFTNIMTISTITSPVFFCFSVPVSGYILGNYGERMALPTHCSFELNSSRLYEFFVILEVKH	228	3	QQP19710.1 | olfactory receptor 15 [Tropidothorax elegans]	7e-68	56.91	—	—	0	0	0	0.309	0	0.786
RpedOR197	Rp.chr1.0285	MDSFHKLLMNVACHVAGDREVELFTLHKALLPLLGYDWWDPPGYTIQWVFKRVVHPASYFLLLTVVSIITCHKCFYLDTSDSLEFFIFMNNIICVFTFMFAALKTLYMRFGYGKEAKHLIKLLTAVGKFKTDVKGWENSLKAFCYYFCLLSSIAGFWAATFLFWYGRFPIEASYPWDQTTSIGHFIGRGSAWSNWINCANAVGSIFPTLHVLLLRTMSDFKCKT	224	3	QQP19702.1 | olfactory receptor 7 [Tropidothorax elegans]	9e-54	48.09	—	—	2.923	2.981	1.554	3.772	3.048	5.202
RpedOR198	Rp.chr3.2460	MAVINFVLFSQTIHYLILATLTIVVLLYVFLRRYRFARFHKMIHGGVYNYTEDDGEIFALFNDEINREWQKLLFVPTIVAMTSGIGLVIIPILDKYGTYRPEEANDPSISFNVPVPMWYSFDTDPPWVSFIMTVCQLCTGGIVGLAVASGGLSYVCLTQTVTREFRILLHAVETVEERSNSLHLKKYGSKPSGSDYDSYQSPTFFICLNTCYKKLYEHHLAILR	224	1	KAE8572985.1 | Odorant receptor 21 [Halyomorpha halys]	3e-32	36.32	—	—	0.86	0	0	0.314	0.703	1
RpedOR199	Rp.chr3.2403	MIVVFAVPALSFYYNQNYKTAIHLLKSGIDRYSNEEPDAQHRKIKEKRVKQLANNIPNEDETPLDSEGRRDLQKSRYLCLRASLQHHQAILRYYQEIRPYIGVMNTYSLLVFALIFASSIVTLIQDPLGNMALIIQLVNELTGYFQLFMVGQIILDKSTDSMMSLYSTPWTSFNKNFSIMINIMLTTAKKPIILRAPFFNVDWTLETYGVTYVREGKPRIP	221	6	QQP19727.1 | olfactory receptor 32 [Tropidothorax elegans]	8e-30	39.31	7tm_6	IPR004117: Olfactory receptor, insect	8.538	4.67	1.26	5.735	6.178	4.056
RpedOR200	Rp.chr4.2902	MSGIYHYADEEDDEELMKIKGSTPAEIRRNSNIFMSIYIFCAIFTSTMFPLSQVVLLDPKDDQDDVVNPYLPHLYYQPFNTRTVHGTVIGYLMGVLIFYFLLLVNCAVNWYYINGVVQMKVHFEMLNYSISHIEERALAMYRKAAKVPAAGAQHLLGSTFFQQCLYLCFRSNVQHHQSILRLRKMFEPFSGSVTLCVFILAPIAYGTLLYLLYQVHTH	218	3	QQP19780.1 | olfactory receptor 85 [Tropidothorax elegans]	2e-32	34.16	7tm_6	IPR004117: Olfactory receptor, insect	0	1.392	1.596	5.813	13.73	31.041
RpedOR201	Rp.chr1.0946	MVADVLHIYTCTLSHLWTVGSRLVTDRAYRLFARNNNQKIEEASLNELKQSREFQICLRECLKANIKHHQTLLRFRNTCQPYNGSSLFILATVIVCTYAAALFLLFQDIPLFLKIKHAGTLLVEQNYSFLICYCGQEVTTESSGVFGSLYSTSWMYYDKDFKKTLHIMMSNTISPMVIKAYLLDYSATLQSLSEMQSAVYKIMNLWRQSDKIK	213	6	QQP19760.1 | olfactory receptor 65 [Tropidothorax elegans]	6e-36	36.96	7tm_6	IPR004117: Olfactory receptor, insect	19.16	5.984	3.267	13.551	17.008	15.568
RpedOR202	Rp.chr3.2472	MTTVSTERTIIRNAKLSGLVPLDDSFSTSKLLYISYDLLVTLFLIWKLTCATLAIFKRNFEDMMLSQCIAMLTATGLVISYFYAAWRRSFVDLISNADDLTKSVLKSSFGKEQYFSELYVQDSRLLSSLNKLMYTMTGLCPFVYCISVPLSAYIVGTPVTDLPVPTNCSFELKINELYGMFVFLQYISLEENQLLRSYKLRDFGDISSNIN	211	4	AXX83038.1 | odorant receptor [Yemma signatus]	2e-23	34.41	—	—	0.547	0.863	0	1.001	1.493	0.637
RpedOR203	Rp.chr3.2405	MLVGMAYPSIRFYHRANINAALNYLKWGFNQYDINDLSGDYVEIRKKRVKQVRFWSFVFGIMCYSDAISVTLKPPISYFMRTGNEEEVDGGVNVYLPLPVYVPFNTRTPSGYAIAFMTNLLYIIVMHTSLFCLIESYLSCALQLLAQVEILNYSLENIENRVFLKLHSDNKLAGRGRTTIGSNDILEYQKNLNSCLKKNIKHHQAIVR	208	1	QQP19727.1 | olfactory receptor 32 [Tropidothorax elegans]	4e-24	35.1	7tm_6	IPR004117: Olfactory receptor, insect	21.099	9.92	3.011	10.152	16.91	14.863
RpedOR204	Rp.chr4.2109	MLTCTGALALVYIIYEHISAELKLLEYCLEKTFERAEELVKSKKEGNMTMKEACILCVRHCGAHHVEIMTYFDDANSVLKYAYLLIFGTGLGMCSIAGFGLISDNTVLKTKFISITLLQLIGLYILCWCGEAISAKGNEIREAIYGLAWYDLPKECHSVFCIMLERTKKPLIFDTAIGMKANLDSYMSLIKASYSYFNMILATQNR	206	5	AXX83035.1 | odorant receptor [Yemma signatus]	2e-61	44.61	7tm_6	IPR004117: Olfactory receptor, insect	0	0.295	0	0	0.51	15.007
RpedOR205	Rp.chr4.0702	MHLSMNVKYLILGIENLHVRSEELFIRRHGNIKKQTNKEDLYLDKRFLLCYKHCLKKSFQHHQLILRWTKTFQKLISGLFGLSYMFVIVLLAMNLHSIKTGSSTPGTLFVSLQLTIGQVCSLAVISALSQRVTNLSEDLRFKIYSTEWYMANGPFKTDIMIFQEMTLRPLQLSGFGLIPINLETFASVMNSAYSYYNLIRAFS	203	5	QQP19718.1 | olfactory receptor 23 [Tropidothorax elegans]	1e-56	50.51	7tm_6	IPR004117: Olfactory receptor, insect	0	8.071	3.77	3.467	0.517	1.545
RpedOR206	Rp.chr1.1252	MTTRTITDKSLKTSRDMILSGIYHYNGEEEGKPEIDSRQYAVYDIRRRTRIVAITYGVLAGYNLVIMPLQVNLFTEDDGIDHSNDVLNKKLPFPMYTPFNSHTFLGYCGGMLMCALYALGGFGGGTAFICIYLSSTLQLKSHLQILNSSIQNIQTRAYMKFLKMGTHAVEKLTEGIYQNKEFQNCMFSCLRANIIHHQTLLR	202	1	QQP19780.1 | olfactory receptor 85 [Tropidothorax elegans]	8e-26	34.48	7tm_6	IPR004117: Olfactory receptor, insect	5.145	2.703	1.722	6.968	9.874	11.754
RpedOR207	Rp.chr4.2017	MAIMLTRSAAFIPLGSTLISMTVSFMNHSKNLERLADYFESNFSTYTSDWEKEIIKNSCDKLDKSSELMRKSSILFAVLYVFVPWAIEGVMASLGYENSISLPLPLEFYIMEDERSRNFFFYSVIIASDIWILLAMTAAATNNTMLLFPITYISAEIEILRTSLKQLHAQVKEGNLINEIDQLPEWDLKVIVEVHRRIIR	200	1	AXX83066.1 | odorant receptor [Yemma signatus]	5e-31	36.46	7tm_6	IPR004117: Olfactory receptor, insect	0	1.517	2.087	4.926	9.185	1.568
RpedOR208	Rp.chr2.1059	MLTLNFKRTNIRVLHKEMMYDFFNYEEDHKEIVDRLSGDMLKEKKLLLLLPLLLTFVGGNAIFGSPFLDNAYGSLGFNASDYDINMDVPIPIDYPFHSRTNLGFYLLSLLQALTMVFVVTAIGTGALVFINVLLYFIMHMKYLVITIESVERRAEVDFRKITSNKTLSGQDMYKDKTYQKCYANCLRKCFHHHQLILR	198	1	AXX83031.1 | odorant receptor [Yemma signatus]	4e-31	38.58	7tm_6	IPR004117: Olfactory receptor, insect	1.361	0.613	0	0.355	1.59	0.905
RpedOR209	Rp.chr3.2465	MYISNFENRFIAASSSVLQTTGICLAIIFSICRESLGDLIERVDQTSEIIQKSAHGSESSFVSTYQNDSSKFLLLFKMMCYSSILCPFFYCLSTAISEYINGVYGSNLGVPINCSFEKGPYGLYEMFWFLQVVGYFIPSLQKLDNEYIMFGLIRVQSAIFKYLSECMKEMASEMPLTNNKKNKKKLIKLAIINQESQK	198	3	QQP19776.1 | olfactory receptor 81 [Tropidothorax elegans]	2e-31	38.32	—	—	8.747	1.226	0.703	3.199	2.386	5.656
RpedOR210	Rp.chr3.1493	MMCGAMDVLCTSIRSKKELVDEKWKNYENGFSTNDDKERIDINLFIKDHQKALEIMKKISDVINPILGLIVANSMVALCTLAIVITKKLKSTESFVEFAREISGFCLVMITSLITLYLYSWMCGELKKSEEDVFYAIYSSNWYNQNQDYKDKVLIVMGQSRKARPLKMLGIGDMDRETFIQGLRAIYSFYNFLVNFE	197	5	QQP19727.1 | olfactory receptor 32 [Tropidothorax elegans]	9e-27	36.42	7tm_6	IPR004117: Olfactory receptor, insect	10.745	9.547	4.59	10.359	7.726	7.958
RpedOR211	Rp.chrX.1865	MYHLNRKSIDYVLITIGKGFYQYEEDDISEEGLKIIRKNKDFLKDLTKKVMIIVAMTGSGVMFIMPIVEYAKNGGEIPEDAVINPYLPLPLVSYWNEKELVGYIIVYILMILTTACVCLELLALSLGYTSLLITFTTQFTLLNLSISKIEERATNRYRSRYGIEPKNNHKFMDPVFQECMYFCLKENIKHHQALLK	196	1	KAE8573500.1 | Odorant receptor 25 [Halyomorpha halys]	7e-40	48.24	7tm_6	IPR004117: Olfactory receptor, insect	1.571	0.619	0.71	1.436	3.749	3.428
RpedOR212	Rp.chr2.1705	MNIHKRAYKLFIKKNYDQKCEASMDELMQKEEFRYCLRKCLKANIEHHHAILRFKNVCQPYNGLLLLNMITVVVTIYAALLYLLLQDLPMLARIKCAGTLLVEQNYSFLICYFGQEVSTESSSLFGSLYSVPWINYDKDFKKTLHIAMSNSMKPMEIKAYLLDFSATLESFSELQSAVYKVMSLWRQSDKIK	192	5	QQP19760.1 | olfactory receptor 65 [Tropidothorax elegans]	1e-33	40	7tm_6	IPR004117: Olfactory receptor, insect	6.013	6.319	6.158	7.329	8.473	5.598
RpedOR213	Rp.chr4.0969	MVKKKMREKARSKCYFDAEFSNRPNNSLSPEEERELQKSLYLCLRSSLQHHQAILRYYKEVKEYLGAMNTFCLLIFALVFATSMIPVIQEPLSNMALLIQLMMEVTGYFQMFLVGQIISDKSADTINTLYSTPWIQSNKNYKIMLNIMLTIAKKPIVLRAPFFNADWTLETFGGMLSGAYKLVNLMLNAL	190	6	QQP19727.1 | olfactory receptor 32 [Tropidothorax elegans]	8e-34	39.22	7tm_6	IPR004117: Olfactory receptor, insect	0	0.958	1.098	1.111	4.695	5.421
RpedOR214	Rp.scaffold.077	MMQAQKEMTCGSLGFDNDEEMRSELTERYKRCLYSCLKANARHHQTLLRFKKECQPFIGIILLITFSLAAIIYATVLYLISQEPPLFVLIHLAITNIAEQIYVLYIGVFGEDIIQESNNTFNELYDTPWIGRDEKLKRMLCIMMSHSRKPMILKSTFLEADASLKSYGDLLTTMYKLMSVARSWANNS	188	5	QQP19760.1 | olfactory receptor 65 [Tropidothorax elegans]	3e-35	37.7	7tm_6	IPR004117: Olfactory receptor, insect	0	8.066	1.11	6.362	8.373	4.764
RpedOR215	Rp.chr3.1492	MMCAEMDVISKSIQSRQELVSDFGNNYQNAFGEEDDEERISLELFIKDHQHGLKITRRISEIINPILGVTLTNSMVCLCTLAIFITKKAKTAESGVEFLGEVSGFFLVMTTSIISLYLYSWMCGELKKSEENVFFSIYSSNWYEQNKAYRDGVLIIMGQSFKSRTLKTLGIGDIKRETFIQVR	183	4	KAE8572983.1 | Odorant receptor 124 [Halyomorpha halys]	8e-81	59.9	7tm_6	IPR004117: Olfactory receptor, insect	14.716	5.302	4.179	14.991	7.741	6.606
RpedOR216	Rp.chr3.1812	MDETKLTDMYKYFEFQRSLLSCLRENVLHHHAILRFAEDTAPFMEALNFLGVAFFSLILAASIMAMRESTQTSNLNVEVIGTLILDVCCFFLMCWLGQFIRDKSEEITSFLYSTPWPYCDKHFNYLLKMMIMKTQHPIILKTPGFNMDMSLATFGDRRGIDSPRFQFGLLCAYLPKNQ	178	5	QQP19727.1 | olfactory receptor 32 [Tropidothorax elegans]	1e-21	40	7tm_6	IPR004117: Olfactory receptor, insect	9.508	12.945	7.03	7.112	14.44	10.312
RpedOR217	Rp.chr1.0947	MNIHKRAYRLFARNNNHKIEEASLNDLKQNREFQICLRECLKANIKHHQTLLRFRNTCQPYNGSSLFILTTVVVCIYAAVLFLLFQNIPLILKIKYAGTFLVEQNYSFLICYLGQEVTTESSGVFKSLYSTSWMYYDKDFKKTLHIMMSNTISPMVIKAYLLDFSATLQSLSEVTL	176	4	QQP19760.1 | olfactory receptor 65 [Tropidothorax elegans]	2e-37	40.12	7tm_6	IPR004117: Olfactory receptor, insect	10.927	7.924	4.74	11.189	13.113	18.313
RpedOR218	Rp.chr4.1673	METDEDFDIMILNLVGSIVMLSGAFKHVLTFFLKKRLAALIYYMETKMPVDELFPGIVFCAQFAGQVSVTAGGYSISGLIFKDKRAKGLLWACDFPWDYTTPAGQFFAILWQSVCAWACFLQNIGLDTVPVVTVYKLRVYIRRLKEKVMQLGKNPNADAEIIAEAVDLHNAILK	174	3	QQP19733.1 | olfactory receptor 38 [Tropidothorax elegans]	5e-13	30.91	7tm_6	IPR004117: Olfactory receptor, insect	0	0.348	0.399	0.808	0.904	2.315
RpedOR219	Rp.chr4.1388	MDETKLTDRYRNYEFQRSLLSCLRENVLHHHAILRFVEYTAPFFDAVNVLAATFFSIILAAAIMAMAESIQTSSLNLEVIGTVLIDVCGFFLMCCLGQFIRDKSEEITTFLYSTPWPYCDKNFNYLLKMMIMKTQHPITLKAPVFNMDMSLATFGDSASAGYKITTLLR	169	5	QQP19727.1 | olfactory receptor 32 [Tropidothorax elegans]	6e-34	42.59	7tm_6	IPR004117: Olfactory receptor, insect	0	7.891	9.87	24.131	30.099	20.921
RpedOR220	Rp.chr4.2108	MCGATVSCSYDYYSEVVYKYIAETEKEREKKINTIVKYLWRLTSYAVLNVTLASFLEKYMTGSRHLLLFPCWFPFDLDYVVFNMIAYLLQFVGVVLACFTSFGTLALVYIIYNHIIAELKLLEYSLEKTFERAEELVKSKKEGNLTMKEACILCVRHCGAHHVEILK	167	2	KAE8573827.1 | Odorant receptor 111 [Halyomorpha halys]	1e-23	33.33	7tm_6	IPR004117: Olfactory receptor, insect	0	3.267	4.994	4.21	6.908	8.843
RpedOR221	Rp.chr3.2459	MQAAYFKYLAVALKELDAENIAGVQKKLVIWIKIHQAVISNAVELVAFFSPVVVLYYVSIICIVAGGVFYQLNASDANVVSTWFLGLYMLITVIYLYVQCHMADELTEEAENLAQVVYSIPWFILDTKSKNFISLIINMSNKPIRVEAFKAVSFTMNKESFVA	163	5	QQP19710.1 | olfactory receptor 15 [Tropidothorax elegans]	2e-64	61.45	7tm_6	IPR004117: Olfactory receptor, insect	0	1.487	0.426	0	1.93	3.569
RpedOR222	Rp.chr3.1751	MDETKLTDMYKNFEFQRSLLSCLRENVLHHHAILRFVEDTAPFMESVNLLAATFFSLVVAASILAMTENTQSTEISSFLYSTPWPNCDKNFSNLLKMMIMKTQHPIILKAPGFNMEISLATFGDVKYIGRLQNNYAFEIIAYVDSSNAI	149	4	QQP19727.1 | olfactory receptor 32 [Tropidothorax elegans]	8e-39	45.64	7tm_6	IPR004117: Olfactory receptor, insect	2.579	1.22	2.796	3.301	10.902	13.506
RpedOR223	Rp.chr4.2107	MVSYLGKVVRYFEDANSLLKYLYMYIFGSGLGMCTISGFALLSDNTALKVKFVSITLLQLSVFYILCWCGEAISAESNEIRGSIYGIAWYDMPKECHSIFYIMVERAKKPLTFDTGFGMKADLDSYMSLIKASYSYFNMILATQSH	146	5	QQP19767.1 | olfactory receptor 72 [Tropidothorax elegans]	3e-47	53.47	7tm_6	IPR004117: Olfactory receptor, insect	0	9.126	18.548	6.736	11.842	15.313
RpedOR224	Rp.chr3.2105	MSNGDSCFRFVEDTAPFMEAVNILAVAFFSLVLAASILAMTESTETSNLNLEVTGTLIIDLCGFFLMCWLGQFIRDKSAEITSFLYSTPWPNCDKSFNNLLKMMIMKTQHPIILRTPGFNIDMSLASFGDSASAGYKITTLLR	143	5	QQP19760.1 | olfactory receptor 65 [Tropidothorax elegans]	1e-83	38.39	7tm_6	IPR004117: Olfactory receptor, insect	7.253	5.082	3.398	2.456	6.594	4.69
RpedOR225	Rp.chr4.1908	MRDTREMWKDLSQVKGNEGIFEDLSLLIRKTVIAVMIVSLVPVPISVLLGLSRNLSLESDKWEPIYKNWDPIRDTLGEDWFWTRTIYQIIIMAYALYLFAAVYCALIIPCLIAGGLMNVLIRNLQSDDVNILRCVKLHQQVLK	143	2	QQP19716.1 | olfactory receptor 21 [Tropidothorax elegans]	3e-36	58.82	—	—	0	4.235	2.913	12.77	9.891	10.942
RpedOR226	Rp.chr3.2399	MYYRKNYKTAINFLKSGIDSYSNEEPDDQHRKFKVERVKQDPLGNLALVIQLMNEMTGYFQIFMVGQVILDKSTDSMMSLYSTPWTNFNKKYNIMLNVMLTMAKKPMILRAPFFNVDWTLETYGAMFSGAYKLLNVLLNTVS	142	4	QQP19727.1 | olfactory receptor 32 [Tropidothorax elegans]	9e-17	38.38	7tm_6	IPR004117: Olfactory receptor, insect	21.64	11.087	5.867	9.397	20.658	18.575
RpedOR227	Rp.chr3.2355	MYYFRLTKAVSPFLEAINSVCILSFSIVLAASIILIAQNPSMNIALIGTLTSDVICYYEMCKVGQDITDKSVEISDALYLTPWPYANKKFTNLLRIMLVNTQRPIIIKARGFNASASLGTYADMISAGYKIINILR	136	4	QQP19727.1 | olfactory receptor 32 [Tropidothorax elegans]	1e-69	52.63	7tm_6	IPR004117: Olfactory receptor, insect	6.212	6.676	10.206	3.614	2.695	7.887
RpedOR228	Rp.chr1.0407	MFSGQMALEVLCSAIQLSPRGFLLVSEVKNGDFHAIETALFSIATFQATVVICYCGHIITKMSEEVFEAAYQNQWYDMSKPEKKMLNFLMLQASRPLDLEYAHLVGFNMEQLARVLQATYSYITLLSGTT	130	4	QQP19742.1 | olfactory receptor 47 [Tropidothorax elegans]	3e-26	39.06	7tm_6	IPR004117: Olfactory receptor, insect	3.839	3.724	4.269	3.239	5.235	1.718
RpedOR229	Rp.chr3.0129	MNTYFLLVFAFQFASSVVPVLQDPLGNVALIIHLVTELTGYFQIFMVAQIISDESTNSIDSLYSTPWTRFNKSYNVMLNIMLTSAKKPIILRAPFFNADWTLETFGGMLSGAYKLVNILMSAV	123	4	QQP19727.1 | olfactory receptor 32 [Tropidothorax elegans]	3e-21	38.14	7tm_6	IPR004117: Olfactory receptor, insect	18.716	6.885	3.947	11.978	34.033	33.765
RpedOR230	Rp.chr5.2255	MNSFCLCLFAIAFASSIVPVIKDPIRNSALTSHLMTEMTGYFQLFLVGQIIADTSADTMKSLYSTPWTISNKNYNVMLNIMLTNAKKPIVLRSPLFNADWTLETFGVLLSGAYKLVNILLSTG	123	4	QQP19752.1 | olfactory receptor 57 [Tropidothorax elegans]	9e-24	45.38	7tm_6	IPR004117: Olfactory receptor, insect	0	49.176	36.083	26.238	65.938	44.657
RpedOR231	Rp.chr1.1190	MLEIKCPTPPSHSQDPLGNPALMVYLLNEVTGYFQAFTVGQIITDKSAHSMNSLYSTPWVHFNKRSNVLLYIMLTFAKKPIIMRAPFFNADWTLETFGALLSATYKLVNVLLNLV	115	4	QQP19727.1 | olfactory receptor 32 [Tropidothorax elegans]	2e-16	42.27	7tm_6	IPR004117: Olfactory receptor, insect	10.337	13.668	6.63	4.878	13.188	8.538
RpedOR232	Rp.chr4.1675	MMQLESGDYLWRCLIPMLISAYLELFVFCRTGQMLASEMEELAECSYDNCWYDCTPENKSSILIILANAQREIKFESYGITAALYPTYLASAQESCSYFLFLRTMSGKMDA	111	3	QQP19733.1 | olfactory receptor 38 [Tropidothorax elegans]	5e-13	30.91	7tm_6	IPR004117: Olfactory receptor, insect	0	20.145	3.745	6.947	9.891	10.451
RpedOR233	Rp.chr1.1401	MGAIVMCRTLLIGHIDVVQLLPVFYLETGYLHTFCALADKVADASGNVRFAAYNTDWTSFSKDLGCAIRIIVLRSSKPPKMRFYGGGSEISCATFTMVFKIGHACLGE	108	3	APZ81439.1 | olfactory receptor 17 [Adelphocoris lineolatus]	5e-07	31.58	7tm_6	IPR004117: Olfactory receptor, insect	11.711	6.713	8.338	9.084	11.131	13.63
RpedOR234	Rp.chr1.1192	MREKDPLGNPALVVYLFNELTGYFQIFMIGQIVTDKSAHSMNSLYSTPWVHFSKRSNVLLNIMLTFAKKPIIMRAPFFNADWTLETFGAMLSATYKLVNVLLSLV	105	4	QQP19727.1 | olfactory receptor 32 [Tropidothorax elegans]	5e-17	41.24	7tm_6	IPR004117: Olfactory receptor, insect	18.246	9.204	5.936	10.676	21.896	22.085
RpedOR235	Rp.chr2.2423	MQIKMCFLYAIGNSMELLITCRIGDLLTEESKNLEHAVDNTHVYLVESYVYKDWLRTILTRARIFIKLSALGVFPLNTETFKNIMATTYSFFTLLTSMKERQERA	105	3	QQP19717.1 | olfactory receptor 22 [Tropidothorax elegans]	1e-40	69.61	7tm_6	IPR004117: Olfactory receptor, insect	22.26	33.941	8.574	14.012	6.967	11.043
RpedOR236	Rp.chr1.1188	MLENESSTPPSHYQDPLGNPALIVYLLNDLTGYFQVFLVGQIITDKSTDSINSLYSTPWVHFNKRSNVTLNIMLTFAKKPIILRAPFFNADWTLETFGVVSLVL	104	3	QQP19727.1 | olfactory receptor 32 [Tropidothorax elegans]	2e-14	44.71	7tm_6	IPR004117: Olfactory receptor, insect	27.629	16.261	10.653	17.514	26.626	32.586
RpedOR237	Rp.chr4.1907	MVNDHDPRVFGALFFVSVCFGAPFLVCLCGHIITDMSEKVHRSSTQGQWYKLAQEDKKALCFLVSRTSKPLSLQYHNLMSFNMVQYATMVQGTYSFITLLTGV	103	3	AXX83054.1 | odorant receptor [Yemma signatus]	2e-116	44.04	7tm_6	IPR004117: Olfactory receptor, insect	0	22.867	14.789	22.443	20.289	21.644

## Sheet: GRs
Gene name	Gene id	protein sequences	ORF(aa)	Number of Exons	BLASTx best hit (Reference/Name/Species)	E value	Identity (%)	Pfam	Interpro	TMM value in RNA-Seq
										2nd	3rd	4th	5th	Female	Male
RpedGR1	Rp.chr1.0499	MEKEGKLFSPNVADLDPATELKHCQERLEKLNIEAPEAELVDELKLEFEPRDYEDRLWEEIRRRTQGSNESIGVYCAVMNNYFHRLPRVPSEAEMIKILRKNILPFYVDRLALYDIQTVRELIRLGRQLEDAKWRVENHRPPPTGRNMLEPDLSYRPSTSRSTNTRFHANEAEVKEVQKPIRCFECSRVGHYARDCPAKKCIEMYVAMKPMILVSGVMGVYPIHKNSPFYTAYVMFLGASVFGCMAYNIVVYEDYVPMKQKNISLSLDRFQFSLGGFTFVFSMVRAFLTNNKMRRLMSNLRILDMMLAQHGIAVEHSPHLYIWSLCLRLGSLSAVLLISMYNTYIEHPSDRFLFYVSIFFPLAVINVVECQHNLLLYSHYLRLAWLTDGLRDSKPRQTQ…	499	3	KAE8573158.1 | Gustatory receptor 21a [Halyomorpha halys]	1e-29	30.03	7tm_7	IPR013604: 7TM chemoreceptor	0.077	0.488	0	0	0.211	0.81
RpedGR2	Rp.chr5.1187	MEPQLTTLRGRSLGDIYGNYHSHGIFNFLQEEEKKIVRRKKKVGALRKDNIHHELRTPIFLANMISLLPVYGISNPDPNCLRFRWKSYKVFYWFLVIFFEVSLTVLTIENYFREKITNRSFGDILFYSGTTFSSIMFLNLARGWNDFIGQWLIVQNMMNDVDKMSVVKKIKYVSLALALSSVCEHLLSNTDIYTNIEDKDGGDKLKMFLEGGHKQVFAVFNYSTALGLSVHLINVLITMIWNYTDIFLTAISIALAKMFKQFTLDLESTANSVTSETSLSYWKQRREIYSRLALLVKLVDDKLSLMILYTFGVNLYFICIQLLHSINPLGSIPKFIYFSASLGHLVCRTYAVCISAASIYENSKEPLPIIFSLPSEYYNIEVQRLQAQISSEVLALTGC…	430	9	QQP19794.1 | gustatory receptor 4 [Tropidothorax elegans]	5e-136	56.14	7tm_7	IPR013604: 7TM chemoreceptor	0	1.273	1.622	0.656	1.224	0.522
RpedGR3	Rp.chr5.1417	MSFSDAWSILVARPEHLEDAEGKAGKALPDFQQAQDSMRLTQQMIVTLKKGRLLPTTAIGFFIVSIVVLLCKALGQSTAMAGQENDEDNHEYSDNFYKIILQVSRVFGVLPFYRDTQVFRSYGLLAYSCCLILLYDLLLYNYWFDFDLRKYIKSDKFLAIFSYYVTWLTFLAVPWLSLGWLNYKLKSMDLLFSKLESIRKSIKYSAETSKIEVIIFSLVVSVLMVLRVLVESDWELPKFTFLLYIFPHIQVFNVVFQFTSMVKMIKRYYAYLVDTLSVDNAQSYVRFTDSLWACCNLAMETWAPQLFLLIVASFSIIVSSGFMTIVLWNTGDELIFIVTSLMFCILSFYIVSTCSETTDEAKKFDKLLYHLIINDSTKTLLRNKRILLHFKAKRKEEFS…	429	5	KAE8573861.1 | Gustatory receptor 90d [Halyomorpha halys]	2e-46	38.32	7tm_7	IPR013604: 7TM chemoreceptor	0	0	0	0.329	0	0
RpedGR4	Rp.chr1.0224	MKDEIKKEFLKPYFIQTKLKKAFPSGEKKLSKFGRKHPYVYYNQFRPILLVLRLFGRYSLQVTENGEYKSSWLSLQMVYCVVSYGLQTYLAVVFSIWRLQALNDSKNNFDEFIFSIHVLAYLNIHFHVPFTYWMEGSKMANYLTQWAKFQENWEDAFGKPLKMNFHKAVMLYIAILLPSVLILLVFEQKAVLHDPLVYFLPYFFTISSSGLVLGPCFCTCLEIKTLTNELNSILVQRLHSQTTPWLLSRWRLLWLELRSLTASLGTELSAVLISTLLTYSTTFLLGIYNGLTQIISTSLSLKSIGYIAAASLSLGFVFTFCDGGHRATDGVVSSTLCTLLNKKMTMLHPDVRHEVYLLVEAIKANPPEIKLGGFVTLNRPLVVGLVSNTLTYLIVLLQF…	410	7	KAE8573479.1 | Gustatory receptor 1 [Halyomorpha halys]	7e-138	56.88	7tm_7	IPR013604: 7TM chemoreceptor	0.565	0.148	2.211	0.86	0.898	2.191
RpedGR5	Rp.chr5.0378	MKDSSDERAFNPEIIRNKLKYIQYDVWTAETSQKTGCKSFGNSYLNEIKPLLILLRLFGRFPYSFGKDGVPRFKLCSISVAYTFIFFTVQALWTSYSLMTIGKIKIAKSCSFDETLFWVANSVFLLQNYSIPHTYWLEAPKTVKYIALWKMFQDHFSEGGLKLRMRVKIKIMSALVVPSMLLLLWLECYLLPDVSILVFAPYISAIGGTYVFILLWALTLHEIRNMTRELSNKLISSGLKNISTSRLLWLRLSCLSTTLGETSGHTGLTTLAILFVTFVLSSYGLLALIFDKNYVLHSFMGLFISAALCLIMKIVICDAADRTTQLVGHNFSQRLLELDLSSFPHMKHEISIFLQTMAANEPIIQFYGFVTVNRALFISFISNTVTYLVVLLQFKTSSL…	410	8	KAE8573864.1 | Gustatory receptor 9 [Halyomorpha halys]	5e-79	42.94	7tm_7	IPR013604: 7TM chemoreceptor	0	9.644	11.567	15.144	13.22	8.544
RpedGR6	Rp.chr2.0033	MLSVRKVGIREEVDGGRPGDGDNLAHYLSPIFLYARILGSLPIDSQFNISPLSLVHTLLVLTLILFGGSLYSYLSYGVAWNANALTYMAAILLSVYITVLVAIANIWNRKDMKDIVRRLTTIDEYLWDMGILFRYNRREVIAEVFLRAFFKAVMVIFDWIAYKESISQLSGPLVIVSLYYSYFILFNIQHQFTALTGTVKKHFSVLNEQCLSLAENSKAMERMIVAHCHLSECCDLIDRWFSPQLLLIASLVFLVTTLNLSAMFMSLISFLDPYPPQITLFISCTLWVAFRLLEMGEIVYLCSAIVNESKSLGQNLSRLVIRKELSPRNPLLKVYLDWNYEVVFTASNFFRMDNTLFISMLSSATTYVVIMVQAQPQMKGVVCLSPSSTSNITILYFNY…	401	4	KAE8573704.1 | Gustatory receptor 170 [Halyomorpha halys]	7e-107	44.17	7tm_7	IPR013604: 7TM chemoreceptor	0	0	0	0	0	0
RpedGR7	Rp.chr5.1504	MKSRDIYWELNPPFFFSRCIGVSPMDRKFKRNITHLAHTVFLLTFMLMLGTYLVIFMESTKALFEMSAFSLLLERAQLIIVVASVVISAGKSISNIGTLSRVVKDIASLDKKLYEVGILFSYSRLYGCAISLMKIFLIVSICLSDLFFLNSVARIEFLVAQYILIMPLLVGNLVEVQFMALLEVIQRRIKVMIEKLKDVSIGMNFTKPNHLQILASVHSSLLSSCEIVNELYSPQILIILSSIFIVTTANLYHLIEKLISFMTKKKYSDLNFVLITFYRVCVRSLEVWTMVKTCVNTQEVAKEFNTLLYQIMIDDKSNDIANNKKLRLHISMKREIVFTACGFFTLDYTLVHSMIAAATTYLVILIQFGQPTSVSDNVTTVSNVTNIITSTESGDFETI	399	4	QQP19795.1 | gustatory receptor 5 [Tropidothorax elegans]	2e-139	61.46	7tm_7	IPR013604: 7TM chemoreceptor	0	0	0	0	0	0
RpedGR8	Rp.chr5.2007	MTGLNVMDVLERRLGLSCVFGLFPLTRKNDIYAPSTFVLYSSAVVLAWLGYAFYLLMRVQIMTVVLWLDAFMIAVYSIMYLSSLLMPLFRRSDLNRAVASISQVHHLVYVPNYKFSNSLPLLCLITFAVALRFSFALQRNKFANLAFFWLAVFNSLLISDQFTSFIGILASQFIALKHELIKAKGMRQKSMYFNSICSCYQEIVIASTNINKVYSLQLLTIFTNIFFKGTSELYLAIEVYFSKIRSMELNDYILVTIKLCWFFICLGLSTHITGACEYTGRQAKEFNTLLYQLMIDDKTNEILNNQKLRLHISMKREVVFTACGFFTLDYTLVHSMIASATTYLVILIQFGQPVVPTTSSDAVYESTTELPVNFSMNTPYSFLMSNST	388	4	KAE8573426.1 | Gustatory receptor 81g [Halyomorpha halys]	1e-47	33.42	7tm_7	IPR013604: 7TM chemoreceptor	0	1.254	0.539	0.909	0.407	0.463
RpedGR9	Rp.chr5.0482	MAEGLGINDRFSVLRKAWVNEKYVDAAFKEIFLLGRKSRFHLFDSNLRIEKAQALTSLAVCSAYVLFALPLYIHCIIYKNTLQMYISVLFSTVGGFLCVCTPFWTAWNIECLRKICKELEWIERRIRWHGLDWSWMPTNLELYGSFLIPIIATIAYDCTNDNDIISNIIGNVWFLIQTASAYDTVKQFVCLQALIRSLLKKTMFLADSEVILHCQESVYTVIDLINHIYGPLILVIYTYMFIPIVCDLYSLFRYHHFHHILWAITAALPLMQIAVSSHLTIIQINKLTKMIYGRTLDYPDDKSLDFHLIARREPVFSASGFFRLENSLICSMIGTGTTYLVIILQYTAPGSLDIQAGSGTNQTIS	365	4	KAE8573184.1 | Gustatory receptor 96 [Halyomorpha halys]	1e-24	31.18	7tm_7	IPR013604: 7TM chemoreceptor	0	0	0	0.193	0	0
RpedGR10	Rp.chr4.0450	MMSLLVYSHLLMENTYEMEMSLARVFWLPRWLGTFPFDSHFSLTKRTVAWTIVFLSTSAVLSSFTQLYFQIHETRRDVKVVASVLTNFLSTLIMLKERDNVTKMKNALDCAAAELAAGGVKWTWGRTTWYMYQSYIICCLMLTLTAIVRFMNQTTLHVISCLLSYIGTFPILLSIIGQFIAIQDIVYSLFDSMFYLKDSKTIIVVSDYLRLVQDACQKVYGVQLFLYVACSFTFLVYNIFLELRMHYKYEMTLVHVLWLIMMVAAIYEIIRSCTKTTEKARKVREMLYEKAVEDQTDSLINNDLLDFYLGFSRELVFTACGFFTLDNSLIYSMMACATTYLVILLQYMKPPVEHYSNFMKN	361	4	KAE8573184.1 | Gustatory receptor 96 [Halyomorpha halys]	9e-63	36.61	7tm_7	IPR013604: 7TM chemoreceptor	0	0.168	0.193	0.391	0	0.249
RpedGR11	Rp.chr5.1160	MVVRRSASVRDVLSVRLLLARWLGLYSCNRRFVRSIFWSRWCRFLILVAICKCIYVWIYNFVLSDRRQIHKYLIASEVFASLEILSCLFLSQRAAPTIGRVIQALVDVEQILADHAIPISYKARHLAFDFAFRAFSLCLICAMRLMYSKHLFSRVLELANMLVLTTAELMNLAVLSCLKQSLQHLNHHVNRKNISLILSLEHLLLEASKSYKDVSGERLLLRISTTYVISTIELYFILTVIGVWGAPYIIYQAVVTPYNLYELFVTLFAISSFTRKTEEMRKTLYGLLLSDDSGKLSYDGKVRARLRMKSSIVFSACGFFPIDASLVHSILSSIANYLTIIYQFGMDQSTHPLDKK	356	7	KAE8573321.1 | Gustatory receptor 192 [Halyomorpha halys]	7e-40	34.82	7tm_7	IPR013604: 7TM chemoreceptor	0	3.075	0	3.962	2.364	1.009
RpedGR12	Rp.chr3.2570	MFTKPIDLAGAIRLAILPSKSLGLFPLAEAGGSYKTSLAGVITSLVLFVFISAFSVYNFFLKESSSEDLLSTVEIVIMNLVIVVSVYEIIARKDSFNKCLESFEEMDECLNSFGRRSMFFYDYKHLLFNVSMGSSLVTVRFFNCGLTPSNDWDDAAKLLLFSLLLTQMVVLVQRYSGLLRIASDLLVSCKKEILISFRHQTSSCVKRLEDLVEVHSRISVASIQLSGCQDLLVLTIIFSSLVISIAEGYRTVLEITLKGGPSESLLMMVNLCGITAFFNLCNQIVRACKSISTKAKEFNTILYELMMEDKTSILSTNRKLRLHFAMKRDIVFTACGFFKLDYTLLHSV	348	3	XP_014282852.1 | gustatory receptor 68a-like [Halyomorpha halys]	2e-46	34.17	7tm_7	IPR013604: 7TM chemoreceptor	0.332	0	0	0	0	0
RpedGR13	Rp.chr5.1418	MAAVGDNTSQGELDGLFRGIFIISKCLGLFPFCISHGKYKLSFFLFAISIGMIAMWSVVVYNFVDFHRLSKNDHLLKKLSHFLPIFTLFTVLPCNLLWLAVNARKLTYVLKILKTFKINVKNSISSIHKYTNIFIGVVVLEYLAEAWVANNIPQKSSTYIYLFMVLSTFLIADQFWSVLVVLRKYYTYICDNLDLETAVEFTNTHDLLAKCCHEINDCYSPQLLLIMMSVFVYIVSVLYTLIMMYVEEKRTDVIQINYLVMFVTTIFHFLTGCRLTTLESKRFDNLLYRLIINDKSKSLMRNNRILLHFKAMKDLEFSAMEFFNFDYSLICSVVSTATTYIVILVQFS	348	4	KAE8573948.1 | Gustatory receptor 22b [Halyomorpha halys]	9e-53	34.07	7tm_7	IPR013604: 7TM chemoreceptor	0	0	0	0	0	0
RpedGR14	Rp.chr5.0103	MSVPCLSLPLLYSQLRLSGIFPFIEDNLCLRLSYRWLSVSLLFSLSVFLVCLKIGLRGPKFTLVSLTYYAFYTRVCLNGVALPIFLVLHLAKYKQINGFIKEIIYIEKQMKTLQVVVLCRCPRKLNWLQFALTVCAFLSVFLPAIFNQVWAPAEHAFQTFSAVIGTTGVIHYLSSMTSLLGSYMSAINKSLADVQKKKSKSQFLTKLITFYNAITSSIYLFYIVYSLIQFKSSFSSTWIFAFLHWLPLCILYFLFIESIVSSTTFLSKEAKQFTNTMHQMIIEDRTRELSNNMKLGLHIRNKQEVIFTACGFFKLDYMLIHSMVSGAATYLVILMQFGQLGAALSR	346	5	KAE8573346.1 | Gustatory receptor 46b [Halyomorpha halys]	1e-22	39.53	7tm_7	IPR013604: 7TM chemoreceptor	0	0	0	0	0	0.649
RpedGR15	Rp.chr4.0843	MIEIGTNNVTEFGKHTFNCFTFIYFVLFIKMSLKWSELKEEWEKMEEYFRGMPVVRARKQIAIITLFYGLVGVFEHFMSKFDGVNQDPENNSVATDMSVQFLRDAFAGVTSWKEFTFWKGILVLTVHLLIATLWNFTDIFLITISIALSSRLKQLYLSLERVLFKDMPAEFWKISRQRYTKISALTKLMNEKFSLILLLTLGNNLYSMCLTLLKTLRLESSPIQKIYFITSFSLVFLRVFGICIAASRIQEISKDLLTIVFATSSNSYNSEVQIFINQIKDDALAINCCRFFRVTRNLFLNVVGSIVTYEVILLQFYCGKETGGAKCTSFNFTSKNP	337	7	XP_014291691.1 | gustatory receptor for sugar taste 64f-like [Halyomorpha halys]	2e-54	39.23	7tm_7	IPR013604: 7TM chemoreceptor	0	0	0	0	0.156	0
RpedGR16	Rp.chr5.1268	MPIIRKLTPLFELSGILGAHPIKLFCKKPSTIYAHILYLPISAIFVCSKVFDTIRDLRRNDNTNVFEIVLILYAMMGIPDIVCMLCHLHMIRKEGVSMVANFNSVQLIKYPVLYPRYLAPIGIVAFTLISIFVTVTVNLGVLVVVMSTILTFGVYVVLMQFCTYLELIKAKITESLPLDSGTILESVTGHLELIKKAGWANRFYSKQLLLLSIRIMLNCIIKIYYVIYTLGLGNKIIALSFACSFGFEFFLLGVLTRCCNEIRKKALEFNKELFKIIRKHRDLCTNEKLKLYVLMKPQIIFSACGFFNIGYPLVTSIIAASMTYLVILVQFSKE	334	5	QFU27934.1 | gustatory receptor 32a [Apolygus lucorum]	4e-26	30.69	7tm_7	IPR013604: 7TM chemoreceptor	0	1.092	1.878	0.422	0.945	0.806
RpedGR17	Rp.chr1.0229	MLVTGSLSKAVRPILILSRCVGILPRSRKPILAVFLFIYSVFLVVFVGYGTFGSFLWLQYPDALLYDSLMHLAIEKAQKGVLYANYLVVLSSNIWFQKDYQKVLVGLKRIDKALLDIQMPVSYNLNSVAFLATVKFASLLGLAVLDYFLSIDSLWLYTFVDLVSTHCPLIPIFSYELQFYAVLSFLAQHLNFITQQLSAAIAASSFEDGLPKMYKLITIYDDLRTLSKEVNRINSMPLLMTVASIFCLGIVNMHLLGTAGSYKHNELLTFLLGSTFLRLYELWYIIQPFVKISKEVIIITLTLFILVSPFFLGEWNLPLKPLTISVLF	328	1	KAE8573478.1 | Gustatory receptor 84 [Halyomorpha halys]	9e-101	50.68	7tm_7	IPR013604: 7TM chemoreceptor	0	0	0	0	0	0
RpedGR18	Rp.chr4.2307	MKVFWLGKCLGAFPFNAQLTPTLYTVSWSIFVVFSAVLMSFFHKFKFSFSLGSSRRTVKVAMANTSNVVSLFVILMRRNSLLTLRENIISIEKKLSAEGIAWVWDKSTVYLLRYHILFAMTMGTGIFVQRNAGLMSGASLLLSYLGPFPILLTILSQFIGLQDIFASILDSLLSAKNPDTLVRAAAALQSAADATQKIYGLQILFYTSCSFVFILCNVYYEIVEDYPPDSTIHHMTWTALFFVALIDIITSCSKTTNKARKLNAILYDRAMEEDSDIWLNNDLLDFHIICNRELVFSAYGFFPLNNSAVCSMVASAVTYLVVLLQLT	327	4	KAE8573184.1 | Gustatory receptor 96 [Halyomorpha halys]	7e-53	35.17	7tm_7	IPR013604: 7TM chemoreceptor	0	0.558	0.853	2.372	0.804	0.275
RpedGR19	Rp.chr4.0842	MEFFQSQGQRNPPRISINGHELIRIRKTSPDLSNVKSNVDIRSDTIEKILNPVLVLGRIVGFPFSRRFRLLSFRALWLALFFTFSTSLTILISKEQLMNLGVATVGAVFFYSFTNIFIMYFLWLSLSWSALKDQWMKVEERMIGLPEVKIISTISVITTSYIVVGLSEHSLSILDNLRRVDHFCLKNESAERVVFEMYYRVQYREIFSLINFAMWKGVLTSVMILMLTVLWSFTDIFLMCIPLALAARLQQLYLALLETKGKVHRFLLQLMCEPLTLTAFKFFAVSRNTVLKIAGTILTYEIVLVQCNLLNTDEKSRRPMIDCPKD	326	7	QQP19793.1 | gustatory receptor 3 [Tropidothorax elegans]	3e-33	43.82	7tm_7	IPR013604: 7TM chemoreceptor	0	0	0	0	0	0
RpedGR20	Rp.chr5.2434	MVVVPSVLTVTIWEICLHVENYSDFARLLREVEKLTTARIVTFVWKWTDVSFCLNIVVVLAVTLLEIVRNSYIPDFLLTTLETIAYSSFYIQLSLIVLRFTGLVSLCASLFEHSIDDLLEFSMPFSWVVDRKAERLVNLCRVHQILCDSTVVLGKANNFTNLAAFGVIFYNIVFISYEALSVITTKKDSIYSWIQKICWVFCPTVLACHIVSSCVWCTMKVSTMFWAKEFNTLLYQLMIDDKTNDISNNKKLRLHISMKREVVFTACGFFTLDYTLVHSMIAAATTYLVILIQFGQPSNTGGGNTTSPTNSTT	313	4	QQP19799.1 | gustatory receptor 9 [Tropidothorax elegans]	3e-45	48.06	7tm_7	IPR013604: 7TM chemoreceptor	0	0.583	0.223	0.676	0.504	1.004
RpedGR21	Rp.chr1.0223	MLYCILIYGLQTYLAVIVCFRRLQALNDSKSDYDEFIFSIHILAYLNIHFHVPFTYWLEGSKMANYLTQWATFQEDWENTFGTPLKMTFLKAVPLYIVILIPAVVLFLIFEQNAVLDDPILYFLPYFMTITSSALVLGMWFGTCLEIKRLTRELNCILMQRLHSQTTPWLLSRWRLLWLELRSLTASLGTELSAVLISTLLTYSTTFLLGIYNGLTQIITRSFDIKALGYLSGAGFSLILIYSFCDGGHRATDGVYLLVEAIKANPPEIKVGGFVSLNRPLVVGLISTTLTYLIVLLQFKVNEEEQNSKR	310	5	KAE8573479.1 | Gustatory receptor 1 [Halyomorpha halys]	7e-111	58.91	7tm_7	IPR013604: 7TM chemoreceptor	0	0	0	0	0.17	0
RpedGR22	Rp.chr3.1436	MLCDKHANFVLVMWDSLMPRTAESILNNVLWLSKLFGVCPMRWQNVEGRCVYSFSRLSFAYSIAVAILSSCGGVYYYTTIISRVTVSITNFLDALCCIFGILNWLVILTHSFVHRKELGRFLPKLLAAGKAMNCTKHSLLYYYSACIQTAVTIVTNLCVMLIDINPHSWLELSTSIFIIIFNNAPVICAHQYALLMGILCDEFDFLNKKLSEETLSSGIHTLVQLHEHLCELEESLNISFNVFLLSSLSLPFIIVVLKIYTVIACVVNPDIANDAAMLLSSAYDAFSCASCIFIIVISASKTKNVVSSEY	310	1	KAE8573537.1 | Gustatory receptor 158 [Halyomorpha halys]	3e-07	31.16	7tm_7	IPR013604: 7TM chemoreceptor	0.249	0.392	0.899	0	0.339	0
RpedGR23	Rp.chr5.0113	MFEILITFIHVLVGFALLISEKQRLLWVLENLFVIEWNLSAVGQLVQYNVFTGLISTYLRLLYLIITLFLLVYSRKFITISGVPLLLSTFFMEFFPITSHLLMRPYIAIMSVINEQYSSLNILLHRLSTTLDHRSRKKIEKLISINTELYDVCDNLNGLYSWIIFMWIVSAWIIIVVNAYFIFCTLVGAGNSNEDFTYELFSSFNTTLVWCIELYSITQASNKVTNKSLFFHNGLYNMTLRDKDDYLGQSEKLQTHFAFEPTSRFVACGYLTLDNSMIHGMLAAATTYIVLLIQYGTQPSGKTNI	305	5	KAE8572952.1 | Gustatory receptor 175 [Halyomorpha halys]	7e-27	33.99	7tm_7	IPR013604: 7TM chemoreceptor	0	0	0	0	0	0
RpedGR24	Rp.chr5.2515	MITLLNHVDLFLMNQGESLAYEINYLEEICFMLYFTGLGTTHVANRELDVKTYIKAVTYYSSVLSLFVCASHFRRSVRLLSSGFATLQKCLETKKRISNHSLESLLTSFDNLYLSCGILNKLYGPQALVISFNSFLLCTANSYFIYQSYALQESYWENVLRVGWLLTFALIGNQIVSPCAAITKHAKEFNILLYQLMIDDKTNEMPKNKKLRLHIAMKREVVFTACGFFTLDYRLVHSMIAAATTYLVILIQFGQPASSTMTTSNEEGNQTIPSNFTYSTNDSTSGDY	288	4	KAE8573172.1 | Gustatory receptor 154a [Halyomorpha halys]	1e-67	46.5	7tm_7	IPR013604: 7TM chemoreceptor	0	1.055	1.693	0.979	2.373	2.492
RpedGR25	Rp.scaffold.251	MSDSLLVVQVIAGCITSIVSLVTSVVSVDLKNSALDALKSSGINNITPKRNYRILFWVFYFLMFAFDFICYDMYSLVLHFWGVQLADLVNNASVYQFEGILSVLENAFQEMYYWLKENNPLKLQKAIRSFERVTIAAEYYNEAYGIQLLAMVGTNFFILTSSVYMVVTDIHPLQQVEMMLSCIVAACNMYRIVSAIDHLLVQRNQFNNALNDLLFKEYTFSSAVEKVS	228	4	UQW94894.1 | gustatory receptor 16 [Tropidothorax elegans]	9e-20	37.29	7tm_7	IPR013604: 7TM chemoreceptor	0	0	0	0.309	1.152	0.59
RpedGR26	Rp.chr1.1233	MEEQQLLKIFDFGVLKMSRYLGLVPFHVDVYKIRFHMKSIVFLLTINAIILVRDLSRIHINYRFSGRYVLWDASRYIAYIGNFILPIVSVVQLVWKRKEYLILARSLSEIESELPNDFVAKKPVSYWCYLSTFIVMAINRIRKAGLNIAKQFNKQLYRMVIFDESKTLVENKIIQAHFKAKRKVEFSAMGLFNLDYPLICTVFNAITSYIVILIQFAE	218	4	KAE8573859.1 | Gustatory receptor 90b [Halyomorpha halys]	4e-19	43.52	7tm_7	IPR013604: 7TM chemoreceptor	0	0	0	0	0	0
RpedGR27	Rp.chr2.1461	METMKRVALLEFYTSVVRMELTLFRIEQFITIVKFLAYQFSKVPQTADGAHDAIKIAAKSLNKAFSIQLFIILSNLFLSILAKIFQILKGPKTAAPFLFGTIAIHAWTLWRVAGVCENLSSSMEEFECELYRFCINKIYWKPIDGKFSLHILARSKLNFSCGGFFYINYPLLHSMLGTCATYLIILIQFNDSGIEGASKENGNTTRI	207	6	KAE8573481.1 | Gustatory receptor 180 [Halyomorpha halys]	2e-15	31.93	7tm_7	IPR013604: 7TM chemoreceptor	0.186	0	0	0	0	0.216
RpedGR28	Rp.chr5.1570	MRIKRIQDNPGVENHIKEESIIMSPIRLRTLQLVYSTGAFEMHRISKVNQIGLSSGFEKLFDQIFVASRYSGIFPIVLKSGRFEISYIYLVVSLIFLSAITFTYFGTGILAYGHLKWVIFNFGGYLHAIRTCRLTVLQANEFDEKLYRLALFDETRTLITSKRVLMHYKAGNRLEFCCMGLFNIDYPLICTMVSTATTYIVILVQFS	207	6	KAE8573947.1 | Gustatory receptor 22a [Halyomorpha halys]	4e-22	48.08	7tm_7	IPR013604: 7TM chemoreceptor	0	0	0	0	0	0
RpedGR29	Rp.chr5.1161	MALSAFPIQNQKLNQSSFVIRTIASALPTSNVEPILEISSSLVEVSGDIHELLTKEALIASAALFFCQTLDLYFIIIVVQDEQIAPPIHVFTFSRTLLRTYQLWRLVSSVGILMDEAKKLDAKLYTMILEDQTNEMAKKEKVFLYFAMKQKVILSASGFFPIDFTLVHSIVAASTSYLVILVQIGGTNVVTTNDSNITMLATQN	204	5	KAE8573322.1 | Gustatory receptor 193 [Halyomorpha halys]	1e-49	48.54	7tm_7	IPR013604: 7TM chemoreceptor	0	0	0	0	0	0
RpedGR30	Rp.chr3.2571	MLFQVVNVYGLVSLFHAVFVLISNCTDAAAWLKFNISIWKSGSVLVKLTTIVEDICLICEDINQLFSEQILLTIASHFLKLVISTYSFITSKQIYSKVISSSWITLLLLVVLSLSGYVEKLKNKIEEFRELLYQIMIEDKSYELSRNAKLRLHISMKRQVEFTAHGFFRVDYPLVHSMIAATATYLVILIQVGLHVE	197	4	KAE8573431.1 | Gustatory receptor 81l [Halyomorpha halys]	2e-33	40.21	7tm_7	IPR013604: 7TM chemoreceptor	0	0	0	0	0	0
RpedGR31	Rp.chr5.2342	MANIRRQMESTRELVVRRRRKEFFNLKTEQFLEQIFLTHDSIMRACGIIEESHCRQILLFMLPIFFSLSTSLFGYTNLLFSGEIVTYSRHLEYFYWFIVPVTLLWEIVDDCEGCKTETTQFTTIVYEIMMEDPTSQLVENSNIQLYLLRSRELEFTACGWFALDNTLLQSVYASSTTYVVMFSQFAE	187	4	KAE8573426.1 | Gustatory receptor 81g [Halyomorpha halys]	2e-22	36.65	7tm_7	IPR013604: 7TM chemoreceptor	0	0.324	0	0	0	0
RpedGR32	Rp.chr5.0459	MGGAAQMLRLAQAKDLLSNTVSIINETFSPLFLFISSLIFILFLDSLFFMAIFAVNGFPGLGLISVLLFWIFFALTSLIRITKRTFLINKKAKEFNNLLYQVMINDMTDELSNNKKLRLHVAMKREVALTACGYFNLDYTLVHSMMAAATTYLVILIQFWQSNSTPTSSPATQPPVVPVTQS	182	4	XP_014279286.2 | gustatory and pheromone receptor 32a-like [Halyomorpha halys]	3e-32	61.62	7tm_7	IPR013604: 7TM chemoreceptor	0	2.999	10.315	10.822	14.701	1.23
RpedGR33	Rp.chr4.2398	MRSTKGLLHFLFHFSRIIGAFPLDDSFKLSKKWLLYSVLVHSASFALFIQDIWDPIASPLGIWMKVYESIEAAISLVLGAVAKRVNEELYWKMAEDKTGLILNNEKLNFHFLAKRELTFTACGFFTLDNSLICAMIAAATRFLVISLQYSNKPSAGDSVLPVNASLHHGAFFNESLTQ	178	4	KAE8573186.1 | Gustatory receptor 95b [Halyomorpha halys]	3e-22	44.83	7tm_7	IPR013604: 7TM chemoreceptor	0	0	0	0	0.295	0
RpedGR34	Rp.chr1.3357	MQFCSILEIIRKHLEELREELHDDELFLVSSISKHQTLMRFCPVVNDAYSWQILIMCFKFFVFSLMVAYLIILDSKALTPNAIRLAILIWEFAMLFPIARTCSEIEEEADSFNNKLFNLMRESKDLCSNDKLHLYVTMKQSVNFTACGFFALGYPLVTSIIAAATTYLVILVQFSMS	177	4	XP_014241344.2 | gustatory and pheromone receptor 32a [Cimex lectularius]	2e-37	46.67	7tm_7	IPR013604: 7TM chemoreceptor	0.217	6.509	0.393	2.781	6.223	1.265
RpedGR35	Rp.chr1.2961	MCDWGVDSDRCRRREGGVFPLAASQLFFRRNLNLNHPPGQNYPIIAGNLGLLLNVALWIMEIMYDASLSETIARKSQNFNYCLHTLFYNDETGLIYHSKKIMNHFRKMNYVCFTAAGYFEFNYKVLLSMSASCTTYFIIVVQFLSFAKRPLGGHTTELQSASHLSSIDLMTI	172	5	KAE8573874.1 | Gustatory receptor 172 [Halyomorpha halys]	7e-15	45.16	7tm_7	IPR013604: 7TM chemoreceptor	0.894	0	1.212	0.818	3.049	2.863
RpedGR36	Rp.chr4.1435	MENGFQQMHQWVKENPGTKLGIAIRTFERVTTAAEYYNEVYGIQLLLIVGMSFYNVTSTVFMLATEKVFNECLQIIVWCAATASTTLRIVYAVDHLLQQRNEFNESLDTLLSEGYVFSSNSENEKVKLHISRKKDLEFTASGFFTLDYGLISAIIGAITTYLVLLLQING	170	5	UQW94894.1 | gustatory receptor 16 [Tropidothorax elegans]	1e-49	50.3	7tm_7	IPR013604: 7TM chemoreceptor	0	0	0	0	0	0
RpedGR37	Rp.chr1.2044	MSSARFRVLQRKLGILTGVYQKLCDVVLRLEEISGPQILFLVIYILEQLICSPFYCLMNNEMFIPDTNVSVNFIIAYALWSLFQIYQLLLLLWPCTLLENEAMKSHAILFRFLDPERNNHIIEMEVLYWKLVHGFKGISVLQLFTLNLSLAVKILGAATTYLVIFIQL	168	5	XP_017779579.1 | PREDICTED: putative gustatory receptor 28a [Nicrophorus vespilloides]	0.0005	30.52	7tm_7	IPR013604: 7TM chemoreceptor	0.458	0.361	0	0.419	0	0.266
RpedGR38	Rp.chr3.0715	MENLKFYTDLEHLCISLLDVFNIFFLAIICMSECHIILLIYSFLKEAQPYYFSFLAAVIVPVVILIHLCANIRTKEKEFNEALYWKMVNDKTGRTLNDEFLNFHFIANREIEFTACGFFELKNSLLCSLLVTTTTYVVIFLQYSYNSSESVEPTHQAFYNTTLVAQ	166	4	KAE8573186.1 | Gustatory receptor 95b [Halyomorpha halys]	2e-12	50	7tm_7	IPR013604: 7TM chemoreceptor	0	0	0	0	0.316	0
RpedGR39	Rp.chr4.1438	MENAFQQMYQWVKENPGTKLGIAIRTFERVTTAAEYYNEVYGIQLLLIVGMSFYNVTSTVFMLATEKVFNEWLQIIVWCAATASTTLRIVYAVDHLLQQRNEFNESLDTLMSEGYVFSSNSENEKVKLHISRKKDLEFTASGFFTLDYGLISAVSFIFLPDIPSRR	166	4	UQW94894.1 | gustatory receptor 16 [Tropidothorax elegans]	8e-43	49.01	7tm_7	IPR013604: 7TM chemoreceptor	0	0	0	0	0	0
RpedGR40	Rp.chr5.0623	MFFTVDYLVDYIQNNDLSKSNRTKLMPVFSGWITIFASLVCFPIHCCQRAVQKAKEFNTLLYQLMIDDKTNELANNKKLRLHISMKREVVFTACGFFTLDYTLIHSMIAAATTYLVILIQFGERNSGSEKSDEVPINITDAPLSVITLNYTTDMTTAL	158	4	XP_014279286.2 | gustatory and pheromone receptor 32a-like [Halyomorpha halys]	1e-58	62.25	7tm_7	IPR013604: 7TM chemoreceptor	0	13.806	10.992	6.672	6.967	5.663
RpedGR41	Rp.chr5.2338	MAIFPAFFLMLVDIVLHMKVFSFHGTQIEGNSVILVLCFQIVYTSVALVLFRDLVVNCNTCLLKANEFTPALYDAVVQDKSKLLVNNIKVQLHLTMKREVRFTAFGFFPLDNTLLHSMIAAVTTYVIILIQFGPSLDKK	139	4	KAE8573907.1 | Gustatory receptor 19 [Halyomorpha halys]	3e-21	47.62	7tm_7	IPR013604: 7TM chemoreceptor	0	0	0	0	0	0
RpedGR42	Rp.chr3.2680	MLILVLVFEAAIPIVILIQLCSHVRKKEKQFNEALYWKMAKDKTGDSLNNEVLHFHYIAYSELELSAFGFFELDNSLICSLLTTATTYVVIFLQYSYSNSNMHHATVSTTHKN	113	4	KAE8573039.1 | Gustatory receptor 98a [Halyomorpha halys]	9e-22	50	7tm_7	IPR013604: 7TM chemoreceptor	0	2.674	0	0.62	0	0

## Sheet: IRs
Gene name	Gene id	protein sequences	ORF(aa)	Number of Exons	BLASTx best hit (Reference/Name/Species)	E value	Identity (%)	Pfam	Interpro	TMM value in RNA-Seq
										2nd	3rd	4th	5th	Female	Male
RpedIR1	Rp.chr2.1289	MVLGLSIKDADRDHAISNTRMGLLAQTIIAEYFKQNNCLIVLSEKGLLKNLNINNTVIYFEVDSENESCQKKLHTFFKKTFEHKCDAYIVQLRDPKCVFNGWFETYRQKFVPRHNPKYFFLPVYPDALMYADELLSMTISDISANILVAEASPNETDWMVTLSTNNFHVHPTTLGRIPKIFLDEWNFEKGFRYNVDLYPDKIIDLMGKPFRIATGDYPPYVTSTPDGFENQISLQFCVIRNCTPVSVSDETGWGDVYENNLTGSGVLGNVYGDNADVGAMAVFLWENLFQFQDYSASYHEGEVTVMTPRPGRVGGWIVPFMPFTLDIWLALFFSVILSASSLYFITRASIKYTRFSEGLEKKRQFTEMGDSCLRAIGLAVLQTPSSRLIGDSPNRYLFT…	624	1	KAE8573612.1 | KAE8573612.1Ionotropic receptor 111 [Halyomorpha halys]	0	47.94	Lig_chan	IPR001320: Ionotropic glutamate receptor	0.062	0	0	0.113	0	0
RpedIR2	Rp.chr2.2468	MITGAIIAGNYEELSEQYYTMKSQFGWSSRSYVLVISSAKDMRSMKGRWAGRPANVLFISDHLYVFHPFRNDLIKVSDDTSLNGVLRSRWSDLFGYSPVVGMCEHDFIRGLNISRSTGGGPDSMALYELTKYWNMSPILFTSIYPHHDLEFPNEELISRKVQFSMNPRVVTEGHMVASIEFTTTVTSDALVIVLKTPRLLGWEVFAKIFTWKMMVALLLTIIVTSFLLMMMSGKIDSRRAIPLALRSIFSIPMKKIPNNLPVRFLLGPMMLISSVIVNVYLASLYHVIEVDHYKKKIETLEELSKLSIPLLAQRSTIRKFFWANNNQEIRNLGNILEEGNISDKILERHAYVMREREMKFLMDTRVIGSNVYAIDEKVMSFTMSYALKKGSIYFEPLND…	622	1	KAE8573611.1 | KAE8573611.1Ionotropic receptor 112 [Halyomorpha halys]	1e-159	40.92	Lig_chan	IPR001320: Ionotropic glutamate receptor	0	0	0	0	0	0
RpedIR3	Rp.chr5.1026	MKGWEETNLRSSIGRHNPKFFFLPVYPSTLTYADELMSLRITDISQYILAAEIIEKNTDWTVLLSTNNFYKHPLEEDREPKIYLDEWHPLSGFKENANLYPDKILDLKGKNFRIAVSKYLPYTIVEPLDGFEVTLADSFCKLHNCTISGVNDEFYWGTIYDNKTGNGVLGLVYIDSAEIGVMACYVWLETFYYVDYSTSYLRGEVTLLVPAPKRLGGWVVPFLPFNNDLWLASFLSLFVTAISLYFVTKASIKYTRFADQLKRKMQFTTMGDSLLRALGLAVLQCPSSSLINSPNRYLFTSFELLYFILTAMYSASLASFLTVPLYTAPIDTFHDFAESGLNWFVTHEAYVYLLAESTEKDVQTVLPVEQIKEKAKEGKHAFPTERCPGGSITEDDHIT…	612	1	KAE8573842.1 | KAE8573842.1Ionotropic receptor 107 [Halyomorpha halys]	0	55.21	Lig_chan	IPR001320: Ionotropic glutamate receptor	0	0	0	0	0	0.073
RpedIR4	Rp.chr5.1275	MIVCSELKSGTWLVVDLTWPGWDQVKDLPGIRYIRADVGITPFMKALESALIRMRNSTDAALIFHSNRHFEQSLWYLVRYSSLRVTVLEGLNEESARKLRNMRPSPTSYIIIADTNAVNDLLKKAIDFDLVYLDDKWNTVFLDMDYGKFNKSLLIKRMMTITMSNKLCCFPGQIPPCKCPENFDWEKEGVTQLKTAIKSAIDMSLQDGLTTTDVTYDCENPPDDEMANNSIFHEKFSEAITNTWLLARSDEAGHTGLRLDVEMKVDGGPATNFLGTWDTEVGLRPSKILPRVKRFFRVATGYQVPYAYKSTSSLDGKTPDVEGYAIDLINELAKLMNFEYELTALDDFGRMEENGTWSGLIGLLATGRVDMIVGSLTMTSEREEVIDFVAPYFEQTGFS…	605	10	KAE8572993.1 | KAE8572993.1Ionotropic receptor 117 [Halyomorpha halys]	2e-180	46.67	Lig_chan	IPR001320: Ionotropic glutamate receptor	0	0.755	1.406	0.985	1.387	1.463
RpedIR5	Rp.chr5.1354	MKAVVVFLLSALRLANSYSQIPLTSAIEYFRSANIDAIALLICSSQYEKVNVVRSLIGEGFSVGYSLQELAKSAQRTGALLDLDCPFNFKEKRGWFMGQAVEWLVYGDTDHSPLDLIPALPDSSVTLFKDDTFYDIYRPSMESPLRVANYTNSPRAHDDFGGIELTAAQVNIKGSNIEENDPDGLFGDLECLNDNHGGWNSSLSLPLLQNLARTLNFSVKIVEPNVRGCKALDMLLQSGKVHFSSTALMITQDRLDFLEFSTHLFEVKSRILYKQPSLSAITNIYLLPFTREVWLACLATFLLAYLVMCFALRAGGAFEEPYVTLADMFTLESKDKEIHELLAKKHINDKSYISVEDGINRIRDGSTAFGVETSRGYKLISKLFEEPEKCGLAELHVFT…	533	9	KAE8573536.1 | KAE8573536.1Ionotropic receptor 118 [Halyomorpha halys]	1e-47	31.79	Lig_chan	IPR001320: Ionotropic glutamate receptor	0	0.114	0.393	0.132	0.395	0.169
RpedIR8a	Rp.chr1.2629	MTYLLLLFISCFFGLKQANPLYEKYVFVQEGETSQDCAFVTPDLVTTIANEHFGTNFTIILFDYLYHADFKFKWILDKIIKGLMYSTVKFGREKNVLEKKFGNEQPSWIIFSSQMDIMDGKTLLISHNTAFQVKEWLTTPLATKYMDIIAVSDPKLQKFRGRENDCNVGLYTHFFNVNLAAPKASILTSWQKSNFTQSVNLYPNKFKQGYNGVHLIIAVDNHPPFAFKRADHIKEFVWDGLEVRLIYYLAEVLNFTIEFKELISDMNNNKVLEDLKAMRVGVGIGRQIATSSSNKAVTLTYPHSLDCASFMSLTSTALPKYRAIMGPFLWDVWLAVTAVYLLAIFPISFSAWHTIQPLLDHPAELENMFWYVFGTFTNCFTFSGEHSWTKDAKCSSKLF…	794	14	QQP19804.1 | QQP19804.1ionotropic receptor 8a [Tropidothorax elegans]	0	70.62	Lig_chan	IPR001320: Ionotropic glutamate receptor	16.64	22.244	43.266	50.8	33.84	30.24
RpedIR21a	Rp.chr1.2983	MVLGLSIKDADKDHVISNARMGLLAQTIIAEYFKQNNCLIVLSEKGLLKNLNINNTVIYFEVDSENESCQKKLHTFFKKTFEYKCDGYIVQLRDPKCVFNGWFETYRQKFVPRHNPKYFFLPVYPDALMYADELLSMTISDISANILVAEASPNETDWTIILSTNNFHVHPTTLGRIPKIFLDEWNFEKGFRYHVDLYPDKIIDLMGKPFRIATDDYPPYVTPTPDGFENQISLQFCIIRNCTPVSVSDETRWGAVYENNLTGSGVYGNVYADNADVGAMAVFLWTNLFQFHDYSASYHEGEVTVMTPRPGRVGGWIVPFMPFSLDIWLALFFSVIVSASSLYFITRASIKYTRFSEGLEKKHQFTEMSDSCMRAIGLAVLQTPSSRLIGDSPNRYLFT…	710	11	QQP19800.1 | QQP19800.1ionotropic receptor 21a [Tropidothorax elegans]	0	59.57	Lig_chan	IPR001320: Ionotropic glutamate receptor	0.762	1.115	0.983	1.393	2.448	2.849
RpedIR25a.1	Rp.chr5.2754	MLWQLLLSLVVGSTCHISDIIIPENPNGKLKDAVYSAAEIYFDKKCLAFFYEMPPSSLEFNNLLIKLHENWSIYIPSKATSHDYLYYFDGGVHSYVQCSFIVTIRPGNYVNQLNKLLYSTWNMDYSNGDSSHTRFIVIVDGIISELEVYECMKSMFMKGDIDVILFVSDGNMISVFSYFPFGRDGLSCPEENLQITRLDYWNGSFASNANLFPMKVPHKFNGCTFPVSTVEYAPYMFSKGHNDFLGIDYEMLNILAKAMNTKLNLTYYNGLNGWIWVDQNTRKPYGSLTDLREGKVWASVSGIANNNLHYRVLLTANPYVYSKLVWYFPNPRRIEPWRLVYEAFTHVMWLWTILATFITPFIVFIIAKLSKKEKYFQEFSHCLFILCSLTFGNSTGLVP…	306	6	KAE8573967.1 | KAE8573967.1Ionotropic receptor 25a [Halyomorpha halys]	6e-111	92.23	Lig_chan	IPR001320: Ionotropic glutamate receptor	0	0.397	0.228	2.304	1.203	2.933
RpedIR25a.2	Rp.chr5.2752	MSRGLWLILYTLTGTTRCHDLHVSWPSWSTDLVDAVYYIAEHYFQEGCMSFLYPRPLVPDLVYSDLLVRLESRWSVTLPCVAPEHYLRLADLSKEPGVHNTLFCPYVVAIKDSNYTPQIESVMYSTWNTVYYEGGGNQSRFVVVVDGEIDKEESYKALKMMTKLGDINAIIVGFEKGVVSIFSLLPFGIDGKSCPEQGLKLVLINQWKGKLLLPTDLFPEKVPSVFNGCQLPVAAVKFRPSFFVKDGLYEGIDFKIIEIVASQLNMTLNITYYDRSDGWLFVNEKREAFGSLRDIRDGKVWAHVSYISNNYFHYPSMVIKTSYITTDSSWYCPNPRLIDSWRLMYLAFSGVLWVFVIVLTIFYPSTTYILSKINKNDKTYRHFWKCVLSFVSIELSNTT…	426	8	QQP19806.1 | QQP19806.1ionotropic receptor 25a [Tropidothorax elegans]	0	80.25	——	——	0	0.143	0.164	0.994	0.741	2.214
RpedIR40a	Rp.chrX.0389	MLLAALLLLIPSSISAMLHYRYNFEKNPSLSDCLMKIAAEQIKTMKFVFMSEELRGQNNIDSIIKLNWERVIVSTYNVSTINGIYVFLPDTNSSVSYDKVLKTKHLDYDSLYMICTDDMHKIFSFFEIAWDYKIIDAIALYPSSTTNKISVYTYVPFGEWGCSNTDPVRINIYDPEKGTFESQENVFSKAGKLFNLHKCPVKLTVKDTPFEEFSKFGETENKDMSLKLFYFLEKKMNFTPEIVLVDRDANAYAAAYYNFTTASVLNIVQGDSDIAVGRFSQLVDYNEYIAAPVQTGMDCFTWAVPMKAGKEPSVWTTSLFEFDLPTWILIFVIFCLTAFVLRLIIRYSKTNYSNPTLALFGTFLSISVSMKFQSTTMRVFVSHWLLFCLVVVAAYSASL…	468	12	KAE8573229.1 | KAE8573229.1Ionotropic receptor 40a [Halyomorpha halys]	9e-103	79.72	Lig_chan	IPR001320: Ionotropic glutamate receptor	0.33	0.91	1.193	1.659	1.575	0.576
RpedIR41a.1	Rp.chr4.1779	MLKSLLYNLVPQLPTCVVVVYSDSVDTAHLLPGDILAMRVHINSPHLKKSLLASYNMRCNGYVTDLSSAKLMLNALAEVRLEAKERHLPKILIVPSSNDSTNSLCEIFEHPEVDYIPDIILSTFKKSVNGSVGLLLLANSFNNKNSANCEILGFWPLNVDDYFPDKIENLKGKGTLRKISLFLIKKLSCDITYIISVEIRVATLEFPPYTILSPEFEGMETRLIKEFCRIHNCTLTLVTDDNLWGEIYGNGTGTGLSGNVYMDLADFGMGAVYAWEKEYHFVDYSYPYLNTRVTVLVPKPKQLPEWRIPLLPFSLTMWAIQLFSVIVAASIMYSVNKMANKLMIESDLRGEFSSFGGTILRVTAMAVLQPPPSRLPPSSPLRRFFTLFEVLFLFFTTIY…	897	17	KAE8573492.1 | KAE8573492.1Ionotropic receptor 41a [Halyomorpha halys]	0	58.17	Lig_chan	IPR001320: Ionotropic glutamate receptor	0	0.883	1.09	0.788	1.057	0.852
RpedIR41a.2	Rp.chr5.2488	MEMRLILLFVMSVEVSPSNIMLKKIWTDMKEILHQSRHLNRLFRTTLPSFHCVQVETDGSPFSLSFLEYLHESNDIPPLVNGGKWLDTMGCNGFIILAANYSSSRSLLERTPRYATHRIIVIIKGIPAVALNDAIMGGVDIYRDADVVLVASSDLTSGYYMAQPKRYFTRFIKPKKWTHNEKGPSDFMGREIRAMTYNCTIFSKASGHLINGRPRFQIGVELKMFEDIAERLNLIPKYKPGVTGKKNLWFMDSLRNKGNNGSDIAFCGILMSAKKMSRFVSMSVPETLICLRILVPRPIPVSREWDGVFHPFEPQLWSAISLFLLITTFVLQRFSWSSAKYSKAPKIRKYKGLGGSFMQLLSILVMTDVPKSSTSQGPLRHLITWWALFSMILTTCFSS…	630	12	KAE8573492.1 | KAE8573492.1Ionotropic receptor 41a [Halyomorpha halys]	0	54.08	Lig_chan	IPR001320: Ionotropic glutamate receptor	0	8.794	3.435	8.519	6.019	5.993
RpedIR41a.3	Rp.chr5.2487	MEPRLVLLTMFLSLYIWIAAADVPSEVFDFVDYHFRHIYGVHMYFCLIKDAVNAFRRLANESPRYNIRFLAYDHEPDELLINYCQPQRLGVFVDLSCDRGLHILNRSRDLFNASYSWIMWNPQELASLLKDTRLNVDSEVMAIDSDINIYDVYRLHSSLEISYTLIGRWNTTYESMQNPSKRNNFNGFVFNASLMMIDIKFNKSNLIEPLLDKSYESGKDMVRRYGLAVFMHLGEMYNFSYSYLLTDAWGDPLPNGSVTGMVGQVMRGEAEFGLAPAKYIIPRYDIIDYVTSLNIVKVCFTFLQPKLFGSAKALILPLDEIVWYCLAGIGVLSVIAFRVLAKYDNTGTSNDNWGGSFLLVIGAISQQGIPDTTERTSTRIVYVFLLIVCFFTAIYYNTA…	1226	22	KAE8573492.1 | KAE8573492.1Ionotropic receptor 41a [Halyomorpha halys]	0	53.73	Lig_chan	IPR001320: Ionotropic glutamate receptor	0	2.882	3.704	8.07	10.619	10.163
RpedIR41c	Rp.chr1.2334	MSRHRRFHVRERSRSSKETAIIRFSCTGLNGEQDTKVSLLRSMSRNGFLISFSLSSIRTQHEYRGGAVLDISCQESSDVLKELSIDKAFGMHTEWLILNTKTDTELTFNTRKKLLEDTYALPGSCVVYGRFDFSREEVNFYDIYRVAMWTEMKFIHLSRQKFDRFMPFRPRGRRSDFEGVVLRSATVVNYADVFVGLETGAPSGYETYFFEGYQISKNIAEYLNFSFSIQLLFEYGYMHNGSFSGIVGLLQRDELDFSSAGIMMRHDRRDVIDYTLVTSIIWSPLIFRQPSLSAVTNIFLLPFESAVWFAFSAITVITIIVLLVEMITTVKVIKNTKPDDVSKGEIIMAVLGHFSQQGSILELKTITGKVTLTLFSIFSFFIFIAYSAKIVALLQSSSS…	608	8	KAE8573690.1 | KAE8573690.1Ionotropic receptor 41c [Halyomorpha halys]	0	53.27	——	——	1.588	3.004	6.429	6.736	2.945	2.587
RpedIR60a	Rp.chr5.2061	MCIFIEYKKRSVKRAPNIKVDILRYMSRKGFTVTFSIDNVEDLPHIRSGGVLELNCGFTYDAITKFTKERSFGVHTEWLLLDQVNNTDNFQISDGVKKLEDAYILPSSCVTLAQISSDEVAYFDMFRVSVFRPLEYTLMSKQPLDSFTPLPPRKNRYNLRGITLTAAAVFYHPKRFYGFDSYEHPEVDTIPKVNHPIVKTLTEQLNFSITLIILDDYGWQTNMTFSGLIGLLQREEIDMGATGVFMRPDRIVTIDFTGDTFEIMSKLIFKQPALSSVSNIFVLPFTQMVWVSCSALASITAVLLIIDALVTVGNRQAFYEAATPWDIITIIIGCVCQQGPYLMPKSGSSKIILFLFSLCAMFFYTSYSANIVALLQSTSPTLKSLSDLTNSPLSVGIQN…	353	3	KAE8573405.1 | KAE8573405.1Ionotropic receptor 106 [Halyomorpha halys]	5e-43	42.78	——	——	0	0.172	0.987	0.799	1.043	1.526
RpedIR60f	Rp.chr4.1206	MKEMLKSGLMVSFSISTIQEESTFKSGAVIDVDCERSYGVLKNMSNRKLFSIDREWLLLEKVNQTTSFQETEGSTQYKNIYALPGSRVTLVQISMSDHQVAFYDMYRITMWTNMKYNFITKMMLNEYGSIPSRKERWDFEGVTLRSGTAILSPEVFDGFWKIEPYQSDAYAKSLIHVSYDAGLYLNFSQTLIVENDYGYPDEKGEITTGLIGRLRREEIDLGASGVMMRPDRLKFCDFTGDNINLRSPVIFKQPSLSTMTNIFVLPFSRSVWYSVAILATITAIMLYFSYSIGVKLNEMSLSNDLSLKEVMTTIIACICQQGPEPLAVPSGRTILLIFELCILSLFVAYSAKIVSLLQSSTKTIKTLSDLSNSPLTIGIQDVFYNRLFFKESTDKDIVE…	955	11	KAE8573444.1 | KAE8573444.1 | Ionotropic receptor 105 [Halyomorpha halys]	1e-64	31.39	——	——	0	0.064	0.073	0.074	0.11	0.047
RpedIR75b	Rp.chr5.0646	MCPDTDVMTMYQYLIRTDLKVNVKIFISEDVTEVISDVILGFFVDLTCMENMQAFVKLSTSSGVWLLYTESEDIGVFPELENLRLDSDVVVATRDGSLFDMYAKFGVVSKVRAGTWQPTNITIPGKKERFDLLGHQLKGAIIHLPLKFIEGNQTAEIIDPNYYPNVASQERYCFVLVQELAGGYNFTLDYQTTDTWGVLLENGSFSGIMGLLTKKIIDVGVSPMEMREERFNNVKFVPPLQSVRFILLFIEERKLGSYKALFIPFSPSVWLCTVMTIIIGSIIFGAMYHGEVLHGVIFLIGILAQQGMAVDPNRGSARFASICLLLLSLILYTYYNAAIMNGLLSPSPTTIHNIHELLKSPLKIGIATTHYLNFAYNQKKYIPPDVLERIKENPNWLLG…	598	11	KAE8572978.1 | KAE8572978.1Ionotropic receptor 75b [Halyomorpha halys]	3e-135	43.34	Lig_chan	IPR001320: Ionotropic glutamate receptor	0	1.731	2.684	3.07	3.611	2.631
RpedIR75d.1	Rp.chr2.3052	MAKIDSSGPKRLPREEEHQHITLLFICPGIRRQAKEDEAKPATPEEICLLTEELIQVFHWLGDRICVTVSSPLLVFLLRTLPAILLTNVDVNSFYLSHSRQLSCTSLVLSSADTLALKPLVTPTVQKLLIIKDSFSGEVNVSNHGNYTISKRQSSKPDWIDGVELRGVTTLLESCGFNWSIFPSTGFGQVYPDGRLEEGKLRWLLTEGEVDIGFCDYWHNSGVVADVLNPWHQACTRLLVPRPQVYHNWYSIFKPLPPEFWAIAILLVLLSAFTITTISSVSAWMPWKKRPKVRTTFGDGCFEAFSLLIQGMSNHLRLYKEMRVLQASWALFCLILGAAYSSSLASILTTPLVEEVPQTLVELVDNNFVWVSGIKPLSNPEFAFKTQSGKDEIWLESQV…	732	9	KAE8573395.1 | KAE8573395.1Ionotropic receptor 75d [Halyomorpha halys]	2e-38	38.83	——	——	1.636	1.497	2.671	2.412	3.742	2.641
RpedIR75d.2	Rp.chr5.1628	MVSHIKVVFSIDETEFNCTLRNVKEKKDLFRGKELKIVTYDDFPFTTVSEVSPGVLKGNGIVFELIDTLQEKYGFKYELIKGTTDMGNENKGLLGRLAKGDADMVAGFLPVLPGTHNYITWGTDLWQMTYYVMMKRPEDSASGSGLLAPFNKEVWFLILTSLMSVGPIIYFIMWLRMKLCPEDELQIFPLSSCMWFVYGALMKQGSTLSPLSDSARLLFATWWIFILILTAFYTANLTAFLTLSLFTLPINEIEDVAKPPHKWFSVKGGSVEYAIQNKDDGDLNVLLSSVNQGRGKFIDIKSDSQVLKLVSGGWLYLNDHYKLTSIMFNDYKSKTSRGIEESKRCTFVLTSNYFLIRSIAFPYQKGSFLPEIFNPVVQTFVESGILKHLMNAYLPDTQI…	590	12	QQP19801.1 | QQP19801.1ionotropic receptor 75d.1 [Tropidothorax elegans]	0	66.43	Lig_chan	IPR001320: Ionotropic glutamate receptor	0	33.533	39.886	43.379	28.591	28.111
RpedIR75d.3	Rp.chr5.1573	MDIKWFIIILSVGNGRALFSSNVIEKKTNFGVELLSFAVRDMIITIPTKHVGIVVDEDSDENAVSILSRMLFKDGIMVAVFTIKREKNEIYNDLMEDIRKRISQYTEAVYVVISKLDIAENIVQMKPPWNFVEYNNDSIIVEGGRDDKLLELLSNKLNFKYEYFDPPDRSQGSAVLNGTMQGVLGLIWRREVEIFIGDLTVTYERSLAVDFSFLTLTDSEAFLTHAPGRLNEALALIRPFNWKVWPAVIATFLMASPLLYLFFLSSNHWHSHKDKLLCDCVWIITSIFLKQNISMDLKKDRVRLLVILLYLVSTYVIGDMYSANLTSMLAKPARGIHHFHLSEKLFTRYSAIALQIGCPFIHNFNELLMQLFEAGILTKITEDEYQKLGDKGTTPLNQD…	569	10	QQP19805.1 | QQP19805.1ionotropic receptor 75d.2 [Tropidothorax elegans]	2e-179	49.33	Lig_chan	IPR001320: Ionotropic glutamate receptor	0	1.07	1.594	2.109	3.239	4.423
RpedIR75d.4	Rp.chr4.0998	MRGHKTGAIVPEDVELLINWNFLHVSDDDKGKRKYDEIIRNKDLEPLKELFTHKYYILNEHLAYLFNYNISIVLGDTYGYKLPNGSYNGMINLLHVRQADFTLTPMGMLIERVYVIDYTVDIERIDFTFIFREERSLGGVNALIVPFTGSVWLVNSMIITLSIIVSTIIFYFYHPQNIISESILNVIGVVCAQGVLEMDVLSSRVLNFFLLILGLMLATYYNAAIMNGLLSPAPALIKDVKGLLQRREVGIANISYVHPLFFHPLLNKRLKEMNTYPVYEIPEGVKKLKGDNFALVGDGTVMYSTMNEIFTDSEKCSTRRMGMSSGTPITCVTKKNSHYTEMLKIGYAWLRENGIASRETKYWYPEQPHCLGGTVFKPVSFKSMTIAFCVYFSGLFLSF…	281	5	QQP19801.1 | QQP19801.1ionotropic receptor 75d.1 [Tropidothorax elegans]	1e-62	48.28	Lig_chan	IPR001320: Ionotropic glutamate receptor	0	11.46	17.85	32.354	22.073	19.796
RpedIR75d.5	Rp.chr5.1572	MLISLIFLIFIRFVLIVAVFVNEEENTIADKSLEVALSYLRRNPRLGVRVDQVTRLTISGNDAKAILENMCEGYNDSVIKGKGAHIVLDATMSGVTSEAVKTFTAALALPTVSASFGQEGDLRQWRVLDAERLKYLIQVNPPSDMIPEIIRSIIQYQNITNAGILFDDSFVMEYKYKALLINMATRHIIVHIKDTQSLKQQLARFRDLDIVNFFILGSLATIKIALETAKANEYFGRKYAWHVITQDKGQLSCSCNNASVLHVKPEPDPGSKERLHVLRTSFNLVEEPEITSVFYFDLFLHSILAIKSMMDGDEWPKDFNYTLCDDYREDKEISRKDLDLMKHLKSVTEPYSYAPFTLEKNGRSFQEFIMKLEKVSIINSQAESAESLGTWKAGLSSPI…	249	5	QQP19805.1 | QQP19805.1ionotropic receptor 75d.2 [Tropidothorax elegans]	3e-65	46.47	——	——	0	0	0	0	0	0.18
RpedIR75e	Rp.chr1.3238	MVLIFKGILFDLHRIDSKWDIVSHEAGNCSNIMPPNFRKRTNLNGTVINSSLVLMDFPFDGSSSSWNKLLDSTYEPEFEILSRLGLSLHLLLEDINNFKIGIKIVNEWGTYNKTQGHWDKGMFRELELNKADIGLSISRLFTRRLDAAFFFPPCLNYRSCFIFKHPLTLAAYTALIKPLTLNSWLTTISCILICGVFLWIIKKFGNPYEPQNDITIAGNILITLGTVCQQGLCMNSYQIPTRILTFFLLFGGLLIFTFYGASVVGFLLSSSPRTINSIDKLLQSPLQKYSEDLLYLKTHFMNPFSENIEKTYQAIKGETPDEDRYIDIISGIEKVQKGGVALYSQDTNLYAVIDKRFKPSEICALAEIEILKLGISTVIRKKSPYKELLYKGY	393	6	KAE8573352.1 | KAE8573352.1Ionotropic receptor 75e [Halyomorpha halys]	2e-101	47.59	Lig_chan	IPR001320: Ionotropic glutamate receptor	1.473	1.083	1.952	2.693	2.142	2.285
RpedIR75f	Rp.chr1.3239	MLLDMPLGIGGSHANSEMRHFLVNVYGYVMDMYGIQCEWYEEKQSSELLVESFQDFIITSEKLSLGVTNQSILLPSVTSIGQCFMFLHPPIYSFPTYYLKPLSHEMLACVTILVISSALLYGLMCFFDFEDDDHNEINLSGCFLLVIGILTNQGLSSTTSRIPKMIIQFTLLQFDVIIWCFYGAIILNYFLYPTHIIIHDIKGLVDEGFSFGKENIPYNNISESNLEVWNSGVNALLKNIGEFNLSFGMEKMRTSKFVFFTISTHIYNSAVESVEFDDLEVCSIVKVPVYKNDQVSMYLKRKLPFKEQFQKGILRLKETGIVYREEKVINKWNTMCSKRIFTRAVTFGSTIFAFKIFVSGLILSILLFGGEICFYRFRSMCLSNVD	386	7	KAE8573353.1 | KAE8573353.1Ionotropic receptor 75f [Halyomorpha halys]	2e-72	40.84	——	——	4.498	3.466	3.071	4.203	5.043	3.955
RpedIR75g	Rp.chr1.3594	MYTTALHGYTMSPPLTRSINNIDDLIEANITLILSDTNKFITDKVMSLRLTQAMSKFAPSPGLEEAANFLRKHRDFAIVERDLEMVGLMSRKGYAFHHVDFKIATIRNSLVYPKGSQYAKRFHRIIIGAIESGLIKLWVKNALSKKQTPSTSLKVRTIAWHDVQSAFALLAIGHIAATVAFVAEIYIHKSREIIRDEDIPRILQELQDLSDQEEHEEPPELLEHDSDFSDEEVNNSEHDSESEQDASDCEPSGNFEEDPFTGKLSKWQKYPISKRSKTKSKNVVKCKPGPKNISDDIYVIFFENNGTGHRNHNAENRHLKKRRKEPVMYLEENTILQPPSLATSATNFHVKNI	605	9	KAE8573743.1 | KAE8573743.1Ionotropic receptor 75g [Halyomorpha halys]	0	65.65	——	——	15.702	10.968	14.421	22.642	21.762	18.647
RpedIR75h	Rp.chr3.1099	MRLFRTAVQNPFVIEYIEDGVAKYKGYCIDLIDEIKKLVGFEYEISVAPDNAFGNMDENGNWNGMIKELIEKRAEIALGSLSVMAERENVVDFTVPYYDLVGITILMKKQTTATSLFKFLTVLESDVWLCILAAYFFTSFLMWVFDRWSPYSYQNNREKYKDDEEKREFNLKECLWFCMTSLTPQGGGEAPKNLSGRLSEIIMSKGYKIKPGQKLCSSCRNLLLKSEESKAASNDEKECLSQDYSDEKEALSNDSDDIGLASEEIFELEKKETLNLLNASFTEAGSSPLKLHGVSEHSKKHYGKRK	428	7	KAE8573549.1 | KAE8573549.1Ionotropic receptor 75h [Halyomorpha halys]	3e-52	33.08	Lig_chan	IPR001320: Ionotropic glutamate receptor	2.434	2.416	4.563	8.079	6.517	4.827
RpedIR75i	Rp.chrX.0938	MRIDAQVTLRRRKPFQHPLSFGEAIIFIVGHISQQGSSIIPQCPSTKTSTFVFSLAGIFFFTSYSANIVRLLQSTSHTINSLSDLTRSQLTVIVQDVIYSKPFFEETKDKDEKELYYKKVLPLGQKAYFLPKDGMKLVRSGPYAFKVNCIQIEEHWGFQIISDTFEEREKCLLGVLNIFLIPRSCIPVAKRNGYREIISQCVARQRDAGLIVRAKRQWLHRKPTCEGNIKGFANVGLEELRPAFIIVFYAMIASLHMLIFEILHHLKCRRKSVSNKIKFFA	541	9	KAE8573548.1 | KAE8573548.1Ionotropic receptor 75i [Halyomorpha halys]	7e-141	42.78	——	——	1.142	0.675	1.935	0.652	1.947	1.08
RpedIR76b	Rp.chrX.0724	MLRFGFMVSFSVSSIQEKTIFKSGAVIDVTCDRSYDILNNMTKRKLFSIDREWILLEEVNQTKSFQLTKGSSEYEKIYALPGSRVTLAQFSTSEQQVALYDMYRITMWTNVKYNLITNQTLNEYGSIPSRKERWDFEGVTLRSGTAVLFPEVFDGFGIMEPYQSDAYAKSLIHVSYDAGQYLNFSQTLIVDNDYGYPDENGEISTGLIGRLRREEIDLGASGIMMRPDRLKFCDFTGDNINLRNPMIMI	524	9	QQP19802.1 | QQP19802.1ionotropic receptor 76b [Tropidothorax elegans]	0	68.75	Lig_chan	IPR001320: Ionotropic glutamate receptor	0.958	0.348	0.799	2.829	5.426	9.604
RpedIR93a.1	Rp.scaffold.284	MPYPSTDNAKLNELSDGAYFHQKLTSDIVGKIRNAEHVYIDRKSMLLYVMKQEFLASNHCGLTIGEEEFLGEDLAMALPLNSPYQQLISNQIYRMHKVGLINKWLEEYLPKKDRCWSKSIATESQTHTVNMDDMQGSFFLLFLGVALGFILIVGEFLFKMWRKRQERAVIHPYLS	175	5	XP_024214423.1 | XP_024214423.1ionotropic receptor 93a [Halyomorpha halys]	2e-65	68.42	——	——	0	16.476	11.667	22.483	16.768	15.027
RpedIR93a.2	Rp.chr5.2712	MNPPWQIVKYDNFGRPSEVTGVIFEVINGLAKSLNFTYELILMSNFSTQFNNNYTYKFHESIGDIALDQKSEFIAWEKVLSLIQNKKVLMAAAAFTVLMAAAAFTVTEERKKHLNFTSTIKTENYAFLVARPKELSRALLFILPFTSDVSRPFY	154	6	XP_024214423.1 | XP_024214423.1ionotropic receptor 93a [Halyomorpha halys]	1e-52	69.39	——	——	0	8.655	5.864	21.903	7.828	11.618
RpedIR93a.3	Rp.scaffold.286	MTPLLCMVHRLSPYYEHYSHRPKGGYTRMMNCFWYIYGALLQQGGGVMPEADSGRLVIGTWWLVVLVLVTTYSGNLVAFLTFPKMDKVISSIDQLMQHRATLTWGMPLHSSLHTILKVNFKNHSYS	126	2	XP_024214423.1 | XP_024214423.1ionotropic receptor 93a [Halyomorpha halys]	1e-52	82.05	Lig_chan	IPR001320: Ionotropic glutamate receptor	0	9.603	15.414	33.972	17.445	20.206
