# Supplementary material for: Genome-wide identification of candidate chemosensory receptors in the bean bug Riptortus pedestris (Hemiptera: Alydidae) and the functional verification of its odorant receptor co-receptor (Orco) in recognizing aggregation pheromone
Source: Front Physiol. 2023 Jul 14;14:1224009. doi: 10.3389/fphys.2023.1224009 (PMC10375722; doi:10.3389/fphys.2023.1224009)
Supplement: Supplementary file 4 [file Table4.XLSX]

## Sheet: Sheet1
HhalOrco	MQKIKMHGLVGDLWPNIRLMQLTGHWLLEYHEETGGMVRLIRLAYCWLTTFLVVMQFAFLACFLILDTYDADQMAAATITTLFFLHSITKFAYFAIRSKYFYRTFGAWNQVNSHPLFAESNARHRATALSRMRKLLMIIGVITIMSVMAWTTVTFLGDPHREITDPEDVNSTITVEMPQLMVDAWYPWDAKTGFCFFATFIYQLYWLFISLSHANLLDILFCSFVIFACEQLKHLKEILQPLMELSATLDSVVPNSGELFRGGSGGSNMPLVENDGNDFDIRGIYSNRGDFSGFGQTAVSTIQTNGNGIGPNGLTKKQELLVRSAIKYWVERHKHVVKFVSSIGDAYGSALLLHMLTSTVTLTLLAYQATKIEGVDVYASTVIGYLLYTLGQVFVFCIH…
HhalOR1	YPPLQDSNIIDGLRVGYLKFFGFWKIINDYRTTGKKNTFMIFKFYTTFIISTPYIVPQLFSYFAINMDIEKATIINLHCLPAIMMCGRILVFWFRMDSQCKLYNLIQKDFLHIPEYKMAKASIIYRKITKNANLLCILAFVMDFSVAFAIASIPGVPVDYILYHKGSMFDVKTGRKKILSGWYPLPMAESPYYEIIFAYEMVCVLTGGLFQPIYICLFYQVLVALIAQFEVLGYHVSTFNISPNSDISQINYNPSAECSIIDSDSYNQNNINSNSNISHRKKITSEKSDSDISEDLYRILQDHQTLLSYADELRSVYNPLVTMNLGLAICFLIVSVFQYQSGETRDIVFVIKALLFMAAQMIELFMFCFGSSSLQAASSDLQLAVYSSDWYKADVKLRK…
HhalOR2	MVFGISPNKWLHDKVKKLNESVDNEIDVYAFIDKEYFRLLQISCIYVKLDKRNRLMSLIQWSFYVTVLFYHYILLTRSTIFMMDINMVLFSQSTHFTLLVQLTTILIVWLQTRHRQITLFHKLLSVDFYDYQEPPAKGADALRNGMVRERRLLSAIPVGAALAAGGVLIIAPIVDRNAGLFDFEEMSKEFSTHMPYPYGKYPYQTIEGISYYLTLGGQLIIGLLLTIIIGSGGFIFLNLAQNVSLQLKLLENSMDQIETRAEFMYLRKCGKTRRDTPSLYNDHQFIYCYNKCLRKNYEHHQVIMRAFHYMEETVSVPMFLAYMTGTIVIALSLISAGSADELPGTTLASMILCGTEIGYMFLFSVFGQRLGDLNMDLRFKIYNIKWYLCNRKVKSNMMI…
HhalOR3	MSPKDKAGYLVEKSNIESDKLTEKFIDSNYYYLTQLSLLYMKMDKKHRIFSIAQFLTFYTIMGYHFILLIRSSVALFGINFIIFVHNSHIGLFSILVPTVVLDFQRHRSAFFHLHRLMFTGFYDYEEPELITVANVREDMTRQRRRLAVIPVSACLATGAVLVLAKFLDRLGTFDFNKTDGLVSDDLPYAFGVYPYNTKSGPGFYISYLLQVMHAAVLAAPIGLSGWTYIVLSQNIMLQLKILIASLESIEERSKQMCERTFPGRFDASSQKTFDSKAFMYCYNICLNKNFEHHQIIMSAFHSLKELFSVPVFLSYMAGTIVIALSLLSSGSGIELPGTTIASALLCFAEVGFMYLFSVFSQHITDLSLDLRFTMYSTKWYYCNKSTAQSIAIFQTMTL…
HhalOR4	MWPVDKITHMFDAMSAESNDEVDDYVSAQYLHLIQYSAMYTRLTRKHRLFTLLEIIIYEFILIYHLIHLGKAALMLIDVSLVTFGETIHFCLLIQLDIILIIFIQTKHNKIALFHRAMAKNFYDYSESYQNNMEELQQDIRKERMLLAMIPITVVMAVPAVLVLTPQVDQYGTFDFSKISTEFNQQLPFPYIIYPYHTEEGIGYYTAALLQVVLATILGGSIGLGGFAYIVMSQNLWIQMEILYDSVNHIEERAEILRSDLFGAKNKLSGDKLYQQVQFEYCYNICLKKNFMHHQIIMRNFHLWADIFSVPTFLAYLTGTLVIALSLLSLGSWVELPGTTISSLILCAGEVGFMYIFSVFSQRLTDLNEKLRFEIYCIKWYLCNKEVKTSLKIFQEVTL…
HhalOR5	MWLVDKVTQIVDAMSAESNDEVDDYVSAQYLHLIQFSAMYTKLNRRRRLFTLLQIIIYEFILIYHLILMVKAALMLIDVSLVTFGETTHFCLLIQLDIILVIFIQTKHNKVALFHRYMMKNFYDYSEFYELNKEGLQQNIRKERMLLAMIPVTVAISVPAVLVLTPQVDQYGTFDFSKISGDFNQHLPFPYIKYPYQTTEGMGYYVASLFQVIGACILSGSIGVGGFAYIVMSQNLWMQMEILYDSIKHIEERTEILQFKLFGARNKLSGDKLYYQTQFAHCYNICLNKNFRHHQIIMRNFHLWADIFSVPTFLAYLTGTLVIALSLLSLGSWVELPGTTISSLILCAGEVGFMYIFSVFSQRLTDLNEKLRFEIYCIKWYLCNKEVKTSLKIFQEVTL…
HhalOR6	MAGMFSQFIDFLNTGGDEKTDLFIEKTFMKLTTVSAIYPILDKQRPLVCLGNFALFLFHSASLTYSWILTAKTSVILFDINFVPFVHEVHLTLLLILSVIILWHSWLKRPNVAKLFRFIDKDLFDYEEELEDKLKLLRSDRIKERRRYILCVIMIGVAASVAVILVPTVNKLGTFNFNATLYEVNFELAVPVTYPFTSMEPVPFFFENAYIMLGATAIALMNCTKSFMAIESNLTLQMHLKLLIYQIENIQVRSAKLYRQLYGVKPKLGGLGSYTPKFLKCYNICLKKTIQHHHVISEVVVEFNEVFGFYVFFYYLTGTLDIAMSMLATSSTDEFPGTTIGAMIICLVEVCFVALFAHMGQRLTDLSVDLREVIYNTPWYRCDQGVANNIKILQIATLK…
HhalOR7	MGVLERLRNFLQDWNRWSDKYSDIMIQKEYRGSMHIIGLYPNVNKVGLFWGSFRALLVGVLLLFHTFGLVVSAVLLYDINFIYFSTALHYVLIVGIAFLYVLYFNTNRHRFARFHTKMYFNFYDYHEEITDEIVDLIKKGEKQKMRFTILPMFAAFIAVCILLVAPILDKYGTFDFDIETTINFNLPLPMVYVFDSSTGAGYFVALTHQLSSAMLCGLVLGGTGYSFIATVSTITIQMRILINRLDTIESRALSLYEANYGLKPNMNDYDLYRDEKFSNCMDTCLRRCVEHHKVILSNISELKDFFSLPLFSIFFVAALIIALAMVGSSNWKVLPGNTIVSLMLCLVEIAFLAIVSSLGQSVTDLNEDIRNSVYGIKWYHCSKGFCLNIRILLSKTLIP…
HhalOR8	MGLTTSVEGLLRKWNDASDEYSDIVMQREYRNYVHIIGLYPNINKVGYFWSCFKIMIIGASLLFHSIGLVVSTVLLYDINFIYFSSALHYVFVVGISFFYNFHFNKNRKFLARYHSRMYFNFYDYKEETTDEIRELVKSTEVQKKRFMILPIFSACAAVCILLLAPILDKYGTFDFDIETSINFNLPLPMVYVFDTFTVAGYLVALTHQLLSAMLCGLIFGGCGYMYIVMVSSLSLQMRILIHRLDTIEARALSIYEANFGPKPKLNDYDLYRDRRFSKCMDYCLKRCVEHHKVILSNIAELNDFSSMPLFAIFFVAALIIALAMLGSSFWKVLPGNTIASLVLCGTEIAFIGTLSSLGQSITDLNEDIRTAIYGIKWYHCNKRFCMNVRILLVKTLEP…
HhalOR9	MNIIDKFTDYFESIDTSDDETNRFMEEKYKGWLQITLIYTKLDRKNIHKTCIQYFFYVLVVFYHWIFVVVGLIDTMGINFILYSKGAYYLGFIQMACCGIITTTVYRDKLVIFHRSMSKNFYDYKEKDTEFIERFKKECDRDVKLFSIVPVSTVIGAVIGFVLSPVLDKYGTHTPEEISSLNINLPAPIIAYQFSTHNNMGFFFAYFLQVCTGCVVIFIIAGGGYLYIIMVQNVCCQLKILIYSVEKLEERADECYYQMSGLKMKHTEKEKFSDQLYDYCYNQCLKKNFEHHQIILRLFDCVRHFFSVPVFMAYLIASVVIALSLLSNNIRELPGTSITSSVLGCIEVSYVAFISFLGQEIIDLNDELRVKMYETRWYYASNQVKNSIKIFQQMTLKPL…
HhalOR10	MWFLDGSKEAEDSGPVEAFIDKQYYRIMQVSALYLRMDPKNRVLSFLQLITYVVILAYHWSLLVNGTLVLFDINMVLFSQSVHFSLLVQLAMILPICFQIKHQKMYQFHKMLSYEFFDYEDPPIIGEDHLRSAMAQENRKMFMIPVGVVAAAGAVLIMAPIVDMNAGSFDFNKTANIFIDNLPYRYAPYPFPVEDGFGYYFALLGQMLCGLLLTLIIAGGGFLFLNLSQNVVLQLKILHSSLDNIEGRTEHLIIKLFGNFDKKKDSYGDSRYAYCYSICLRKNFEHHQIVVRAFKILEELASVPVFLAYTTGTIVIALSLISAGSMKELPGTTLASMILCGVEVGYMFLFSVFGQRLSDLSSDLRFKLYSIKWYLCNNKVKSNMLIFQEMTLKPLTMTV…
HhalOR11	MWQYHEDSEANRVVDTYIFEHYYYLPQISGLYPKMDGRNRIFTTLQLIISVLTLLHQMAILIKSTIALYGFDMVLLCQNVHFCLLIQIALITVGNCLWKHFSLYDIHRLLSYDFYDYQEPPGIGEELLRSTMETERRRLNCIPIGVAIAAGVVLALSPIIDFNAGSFDFNRTASVFSHHLPMPFTQYPYHVKDGFGFGFALFGQLGTGFLLTAIIGGAGFLFINLTQNISLQLKILNNSLENIDSRIEHLYSKLFGKMDRNIMKSLRHDSRYAYCYTKCLRKNFEHHQVILKSFHLLEDICSLPMGISYLTGTIVIALSLISTGSAKELPGTTMAAMILCVVEVSYMFLFSAVGQRFTDLSNELRCKMYNTRWYMCSKEIKSSLMIFEEMTLKPMTMTG…
HhalOR12	QGIEASPSELPTMFGQEKVRSILKNYFTTEGKREDSLAFEAVRRFIHGMVFYKTYVIPLPFFIVLNSIMVVLLLTENIIQIAHINWFGKLVEYNLSYPAVFYSLLVIKNRKDLIYISESIDVWWNYPFLEDKTKMIKKKAEAWLKRFTSAYYTLMILGFLCIFFQPLGKFIWNGRTDLKDLLLFKCWSPVPLDKTWGLVTIMVFEIIAQFSPFFMYSAIGSYMITMTILFYHQTNLIGVAFTTIEKRVWMMVRARTETSNGAYQIYSKNLQQEIANCARNYQNLYEYLKKMCEIFNVTTNILYYTGMCLLVSSGLQIVTKKTNALLLFQAVMLITSVIVNQYLNSFITETLSEAQSSLRISVYNCDWYNMPKKCQININLMLILVSYSPKLTTILGARC…
HhalOR13	LRVHQFSGVMRHLAAITDSDVIDGLNIGFLKIFGVWGIINDYRTTGKKNFVSKFQVFITLLLAVPYIFCQNLSYFMIKVDIQKATFLNLHALPALQMCCKVMVFWFRLDSQSRLYSLVKKDFIHVPEEKKDEAAKIFKKITTKANLLCLAAFLVDLSITAFSIADPSISVDYLLHGTGSMTAVVGGKQKIMGGWYPLPMADWPYYEAIFIFETVLMIWSGVLLALYVSLFYQVLICLYAQFVVLNLHVSTLKNHFSIDCDRKNINNREVHSSLNKEEIYAVAKDHQRLLSYANELRSVYNPLVTMILGMGVFVLIIGVFQFLFGKSTKPMFIFKFMLLLAYQGVEVSMFCFGSSALETASSDLQFAIYSSDWYKKDIQFRKAVQMVMVGARKGVTLTAV…
HhalOR14	MTVKKDELDEEFFYDFRETRKWYKIFAGSSMSKQMKPTIFLEIYRIFAFLFLIMMTFMFLFTALLTTEYLAEFSEAFHYFCILLTMAIYIPVERLAKNDIDKSFLKLKKCFYLYNGELNNTQKKIKRQTIEYIKFTDRVFFWMLIFVCVLYSILTPLKDYFYPHLRLERSEIIDRKLPIPFYIPFEDSYGITFIIVFLMECCCNMMVHSLITSIHEAYISLTGQIYGEMKLINYSLSHIEERAIKLYLSKQQKRVHRLKCIYRLPAFQKCFKKCLKEDMIHHQTLLSSIKLVRPFTGRIIISVFTLCSIVWAVDVYVISKMIEQASAMDKVLEFLLMLFTEAVYVFDMCHFNEKIRSENDELFMQIYSTPWYNYDRKLGQNVHLMLMNTIKPTKLNSNL…
HhalOR15	MGKMFDVTEDIEIDKFIDKQYFYLMQISCIYIKLDKRYRVFSIIQWIFSFGNLVYHYLLLARSTMLMMTFNMVLFSQSSHFALLLQLTMILTFYFQTKHRELMLFHKMLSHGFFDYEEPPPPGDKELRSAMLRERRILIMIPTAVALAGGVILVGSPIIDRRLGSFDLEVLDREFSTHLPYPYGKYPYQTKEGFSYYAALAGQIFNGSLLTVFIGTAGFLFLTLAQNVSLQLQLLQNSLQHVEVRAEEMYFRLFGKTKNDGTSLYEDPQFSYCYSTCLRKNFKHHQIILRAFEYTEGIMSAPMFLAYMTGTIVIALSLISTGSVQELPGTTISAMILCGVEVGYIFLLSVFGQRIGDLNMELRFKIYSIKWYLCNRALKSNLLIFQEKTMKPLTIMAGG…
HhalOR16	MQLSEKDYLLKGYQGSQCFLLRIGAMYVLQDENEVYNWIFVGIFHMHYYVFLFWILPYDVSHTIPMGHMTATLQALHYYCTFLGYSIVNYLYHFNRKSVNFCLTLIGKSFFEYEEGGTEIEIKAAQESDKNQKEYIKKLTRYVMVIVFATAFAVLMLPPFAELLTRDGPIPDDEIMNPYLPIPLVLPWDSFSIGGYLLIYVFLFLVSYNICTELLALSMGYTSFLIIYINQFKILNNSVLKIEERATKRYKKVAVKQLKGMEKFDDPIFQECMILCLKQNIKHHQILLKWMDEACHFLGWGVLCTIFTTSFLLAASGFLITMESDSSLLKSLILVQVQILELLHAYLFCWWGENLATESAKLYHSLYKTPWFYCGKRFNKLMQIMMNRASKPVIPRDPL…
HhalOR17	MKLLISDYDVEIDGVIEKTYSGLNTISAIYPVMDMERPRLCLINLFLFLFHSVILTVMTSSLVQASLELFYINFVPFVHELHLAFLGLLSIAILWHSWLKRSNVTRLHRIITQGFFDYKEDLEDKMKVLGEDRIKERKRHILYVILIGFAASVVVILIPAVNQFGTFRYNSTAYKVNFDLPVPLPYPFMGTEPLDLLPGYTMIVVTASSIALMNCTKSFMAIDCNLHIQMQLKLLLHQIEIIKSRAGRLYIKLYGTEPKYNGLKLYDKKFMKCYRICLRRSIQHHQIIVRALNEFNEVFGFYVFFYYLTGTLDIAMSMLATSSTKEFPGTTIGALIICIVEVGFVFVFAHMGQNITDLSVELREVIYDMPWYRCDQETKTTMRVLQIATLKPLSFSFYS…
HhalOR18	MDTIKLSAEDIPIDRQITHDYETDRKNLMYMSGFKVNNDSNLKYILSKIYVYAIIFFYSFLVSMGSVAAILIHDKKLKLEAVHWTFLNLVGLIFMVIRYTYVLDEPLKTIRTGFFTYENEFIDDRYLERKKYHVRRIRIVSNMFLGLAISNGILLSFIKQVKKSSEVGNYGKSINIGLPIPIFLPFDTTTTNGFVLGYLINVVAFFYLVVITSSAQQIFLSFMEQGIVQFEILNISISNIEKRAYYIYSKGKACAEGISIELYRTRKFQNCISQCLRQNVRHHQTLLRFRNDIKTYVEAVFVLLILASIVVFAAIMFVILELQDLSEASTLFWLLSTEIIYVFVVCIYGELFSQESAKMFYALWDIPWWNFDKRNKVILHIMLSNSMNPVVINAPFFSS…
HhalOR19	MLKDIKAILKEKIEQAVGKALMENQGIYMVISGVYPVNIYYSLTAILCQLFTLSFFMYTCIYFYYNEYNLSMFSEAAHFVVVVFCSTSFYIIFWFRKDKVHNITKLLEQEIFKYKGTLDLETRSEIDEMTLKMKNRKNKISNIMTIVYIICGLFGVILLPIIFKKSAITVKEERILLTVPVATYYPVRGDFGWYLCSAQQYLTTFFIISALNGSDVAFSCYCEEGCNQLRILCHAIRHSLRRARYLHTHIFGKEPLTLRDETFAICLKMCLDESVIHHYRLIRYFKEIQSLFSWCVMIVMMAGASMLCLSGIYFFFDVVGFGTKISFAFYLSGELMHTFIYAWYGQQISEMSAEIREVLYEIDWEDCSKTVKPYILIMQAYTNNPIKLKGGDFMEYNLN…
HhalOR20	RLRAARAMKYQAISDKDIIDGLNVKYLKMFGLWKVINDYRATGKRNAILKFEVGLITLLVIIYSICQFMSFFNIQFDVQKFTFLNLYTLPGFQAVFKILVFWFRIEDQCKMYNLVRKDFLKIPSHKEAHVKRIYENISAKSNMFCNAAILINTSTVILWILYPGLPVDYILYNIGSTDVVRTGRNKILGGWYPMPMGETPYYEIIFVFEAVMIIIGGLNLAVYICQFFQVLMCLYAQFAVLGYHLSTLKFNAVDGDDRIEDSENNAMYKELNEILEDHQKLLSYANELKSVYNPLVTVILGMGLLVLIFSVFQFLFGSLGNMMFLFTSLQTLTFQAVEVGMFCFGSQFLETASSELQLAAYSSDWYKADIKFKRAVQMMMVRAKKGETLSAVRMYPVNV…
HhalOR21	MGYEAVIKDTDVIEGLNIRFLKLFRMWNAVNDYRSTGKRNIIIKIYIFGSFLLTVPAAIFQIESVFTIEFDIQKATFMYMHTLPAISLCCRIIVFWFRMDSQCKLYDLMRNDFFDIPERLRGKVKEVYKETNKLSNICCLIPFIWNTGIEIWFIAFPGVSVEYIQHRTGSMSAVTTGSKKILSGWYPFPVEEYPNYQLVFAYETLCLLWAANVMAMYFSLFYQILMCLYAQFVVLGFRLSNLKVEFRDDDIATQKTSGQEKKNPRINEELNAILRDHQKLLRYTEELRSIYNPLVTMTLGLGILIITIGAAQLLLGKTSDPSFLFQLFQIFSFQFIEMSLFCYGSSLIETASTDLHFAVYCSDWYRADTKFRKSAQMMMIRARKSMNLTAIVMYPINME…
HhalOR22	MVVTLWSFLKSYFLTQEKPEKAGYVFNTAHYFLYGLTVYKKKTRLAIPMEFILLLSSVVMFSSILQSLLDFWKTKWIELLCIYITLVTPILCSLTVILHRERIRAVSEQVDRWWNYPLLDKETKKMKTLAAVTMDRFNRYYFSAMYVAAAICGVLPFQQNNLSAEKMKPMDKLIFPMWTPFSIDGSWGFFAASLLQVLAIWFAYFSFGRLFSYFMSLSFTISNQMKLIGRACQTRLRRVEIMMKDLDITDNRSLDQLYIEMMMKDINCCIIHYQILYGHLKEIRRAFSLITNLTYHAGMWAMCLFGVSFVKEKENPYTLIRLASAIVSLFFHQYLISYVSEVLTDELENLRLAVYSSQWYNVPQKLKKNIHLFLTLLLYIPTLRTIMGTKTNMENLSQI…
HhalOR23	MELLAWPRSLLSKYVAAVIKDEPRGYVYTSSVTIRFGIAIMEIRKNEYLVVRYPLLMLFSITTILWILIDHILAFSDARWFSKILDYNYSGGSLLFTYTLKVKRAEISVFTQVLDQWWSYSFLDQKQEELKERLQRKLKKFNNFYNRFMVTMGIGFGMMPLGRYFYETEKSSTNLLLERCWSPFPLDTWWGFSITYWVELTSMLSLFYSWAYIVCFLISVMETIGKQLQLIGISLVTVEERVKKAMSLFKVKDKEEWYELYVRMMQKELKNSVKHYQKMYRLSEEACSVFSTPINVCFHSGIIALVASCVKLATERENKFVIFQAIVMVVNVLVNQFIVSCINQILTDQLDSLRDTIYESSWYKLPIPCRKTIHMTQVMLLRPPSIRTVMGTKTDMEFF…
HhalOR24	RTMGDKAAITDSDVIDGLSIRYLKFFGLWGVINDYRTTEKRNSVLKFQILITLLLMLPSIICQYVGFFVIEMDIQKATLLNFHSLPPLQLCCKHLLFCFRLDSICRLNNLMMKDFLKESIPEYQREKVISIYRKISKQTNIFCLVAFVVITIGVSLICIPEVPVDYILYHTGNMFAITTGRCKISTGWYPLPMDKSPWYEIVLVYECIVVLWASSFVTAFMFLYFQILMSLYAQFVVLGSHISDLNIDSDYQKNSIEYRILNLQNNRELHRILQDHQKLLSYAAELRSVYNPLVTMILGVGMSVLVIAVFQFLFGQTGDLMFIARAFFYVLYQSVEVSMFCFGSLFVQTASSDLQFAIYSSDWYKADVKFRKAAQMMMIRAKKGETLTAIRMYPVNAET…
HhalOR25	LSGAMEAMRDSDVIDGLSIRYLKIFGIWKIINDYRTTGNKNMILKIQVIITVMVTLPSILSQFLALLVIEVDIQKATILNFHALPPLQALSKQLVFWFNIDSICRLYNLMRKDFLEKTVNDIEREKVEFIYRKFSRETNTTCLVAFIVINIAGSFVLLFPGISVDYILYHTGKLSAVTTGRRKISTGWYPLPMDTSPCYEIVVLYEGILVMWCGYAILVFMCLYYQLLKCLHAQFALIVSHVSTLKIDYEYEKNSIEYRFTNQQVYSRMYRILQDHQKLLSYAAELRSVYNPLVTMILGVGMSVLVIAVFQFLFGQTGDLLFMVRAFFYVLYQCIEVSMFCLGSLFVQTASSDLHSAIYSSDWYKADVKFRKAVQMMMIRAKKGETLTAIRMYPVNAET…
HhalOR26	MGNEDAIKDSDVINGLSIRFLKLFGMWNAINEYRSNGKRTAVINVHTFGTLFITVPYVVCQLQSFFMIEFDIQKLTFLYLHPLPASSLCYRILVFWFRMGTLCRLYNLMRNDFFNIPEHVKTGVKELYKKTSKMSNTCCMYVFIWNAGIEILYLFFPGMSVEYIQHHTGSMAEVKTGKKKIFGGWYPVPMSEYPYYEIIFVYESICLLWAATLLAVYFCLFFQLLMCLYGQFVVLGYRFSNLKVDDADRKIRKNNPYNRNNSSRIYEELHQILLEHQKLLRYTDELRSVYNPLVTISLGIGVIVLIIGAVQILMGKTSDPGTIFQIIQVFSLEIMEVSLLCFGSSLIGTASSDLQFSIYCSDWYKADVKFRKAAQMLMVRSRKSSTLTAIVMYPVNLET…
HhalOR27	MTYGKSIKGLFFAEEGNKEMGFISNIARFVLAGVTMWQSHSRFVIPSALVGFFGVLMLLSNLIHTIYNFDKLNWINKVVDYGWTSVYLTSSYIVVYHKEEIKSLSEELDRWWQYTYLERETAKLKKKSEDWMRTFNSYYVTCGCISWVFYVGLPAVKFFYKTPEQRNEALIFVAWTPFQLDTTWGYFITYGLEVVMMAFAQCIYIQIFQLLMTFAIVMGHQMRLIGTSLLTIFKRIKRMMKNMTFESRIEFYEVRDLLLEKELGNAIMHFQNLYRCSSRLSRIFASITNVTYHGGVWVMCSIAVKAATEMSFVAVLQAFMMIGAVTLSQYVYSFFNECLIEEVQKLRNEVYDSPWYEMPTKSRKTFQIFQSMLDSDRFPTLRTIMGIRTNMENLSKVIN…
HhalOR28	CLGGTKRLERFVTKRSYSSMGKIWLKNIEEGLKGPRMFLSLAGLGVVFKGRFAFASFVFANNVLALCLLAYSIYYYLDQIEKVSNIVHHAVLIMDICVALVLGYFRHDEFIAILSDPSSSYHYESQMMSKKIEEVKGIACKNYTGMFKYIVLSMVYLHVLMNVLAICQRYFNDEEILLLFPCYFPFPIDNYPVHIAVIIWQELVVSNIGILVFSGLLFIHCIYTHVKSEIDILKFAMVNIEERAYEMAMNQKESRDPTSHPETLSRCQVKCTRMCAEHHSIIISYFHNGGFLIETVYFLVILTGLVVCSCTGFALISENTSLKIKFVGIMIIQIIFLYIMCWLAEETAEQSQSVGDVVYGMEWYRLPKECQTIFLIMMIRAGKPLLMRMLTGQKVDLAA…
HhalOR29	MIDGGIEDSDILEGLNVRYLKIFGLWKVINDYRKTGKRNGIIKFEVFCTFILTLPYVICQYMSYFNIEVDIQKATFLNLYPLPALQMCCRIAVFWFRIDIQCRLYDLIKKNFLNIPEGSRAQIEEIYKRISKVSNMCCMATLIVNASIVSLYVVNPGISVDYILYHTGSMTEVTTGRKKILGGWYPVPMAESPYYEIIFVYEAICILWGGLFLAVYFSLYYHVLVCLYAHFTVLGFQIENLKMKSVKSGGSKSCINRDQNNNSIVYENLIDMIRDHQKLLRYFEELRTVYNPLVTLTLGIGVIVLIIGAIQFLLGKSINPGFIFQISEVFALQGLEVCMFCFGSSSIEAASSGLQFAIYSSDWYKADVKFRKAAQMLMVRANRGVSLTAIRMYPVNVET…
HhalOR30	MGYEIKDSDVIDGLSIRFLKFFGMWKAINDYRTRGKKNIIIKIHLLGSLMITIPYVVFQVQSFFTIQFDIQKITFISLHALPALQMCCRLLLFWFQLNRVCRLYDMIRNNFINIPEDMKDQMRDLYINTNRTLNLNCLVVFIWNIGIVLIFSISPRVPIDYIRYHTGSIAEVKTGRMKILSGWFPFPMDEYPYYEIIYVYEVFCLSWATTLVSVYFCLFYQVLMCLYVQFTVLGASLSNLKIDCPDFRQSKRHKNIIQNRNSNLYEELYECLQDHQKLLRYTDDLRKVYNPLVTVTFGIGILVLFMGALQILLGKTCDLSFLFQLIQMLSSQFLEVSLFCFGSSRIETVSTDLQFAIYSSDWYKADVKFRKAAQMLMVRTRKSSTLTAIVMYPVNLETL…
HhalOR31	WLPIMSLQFETTHSSMIHLLRRSGLKLPWVKHRSYWNQFCYFAYDILLFTIGLYQFICSACSIIFVPTFQDMCTLGIVTSVLATGGSITLFYFFYQNRLEKFTENWNALNDNILNSDLDKKDFFRQMFLQVAKNNESFTKTILFVVFWTPIIYCTPVPVVDAIKQSYRTNLPLPILYLYDDRQPVVYELTFFLHMMGLVISVMKKFGNDCFFLALFKIHIAYLRYLSVAIKCEGTKFSKCNNKIIKQNLISWIKIHQQIVKNAQDLIRLYTPIIIVYHVNLICIVVFGLFTQIKNDRDSSVQRIGTAMFCTVNIFQLYMQCSSAEELTNEAEKVSQEIYNTPWNEVDECNADIIRLVLKMASRPVEVTAFKAPTFLLNKQSFVAFVVNTIRAFMTFSKM…
HhalOR32	MAPERVMEKDLMDGLSIFFVKYLGFWGTVNTYRTSGKVNLLFKIQWFLTFLCVPFPIFQFMSPAYIKFDLEKATIIILNTTSFFQMTFKQAVYSMNIKEHAILLEVMTKDILRSLPEYKKPHAKRIFEKISKRCNFWCFIAVVITFTAVSLWTMNPCISSEYIANHVGNMKDVTTGPKKILGGWYPVPFTRSPWEEIVYAYEFLWFFWIGYNVAIYELVITMEVLTLHAQMSVLNYHVSTLSKKEIVQHSGKKGLTQREVEDLFYQELLAIIRDHEMLLGYGNRLRNCFNAYITMLLATGGLLLIASIFQFLFGAKDAVVSVNYMLYLLYEVAEFIFLCTATTMLETSSTNIAFSIYSSEWYTSDKRSRDTIQMIMIRSRKPMSLIAVKMYPVNVETLM…
HhalOR33	MSEPIRESDIFDGQTTFYMKYVGIWKIVNTYRTSGKMSLVFRLEWYLTLLLSVPFQVLQVISPSYIDVDLEKATILILNTVSFLHMVAKHGTFWWNIKGHAELFRLMTKDLLTSIPQYKAAEAKKIYQDATKRCNFYCRMIVTITYSVWSLWTFNPTVKSDYIQFHTGNMKDVTTGPKKILGGWYPLPFSQSPWTEIIYFYEAILLLWCAVIVSIFDTVVTQEVMGLYAHLSVLNFHISTLKKEEIIFHSKREIHTEQEAEDLMHKEFVAIIRDHQYLLRCGKIIKECYNTYITALLLAGGNLMIITVFQFFYGKKDIPTTINFVFYLSYGVMEISLLCWTTTLLETASTNIAFSIYSSDWYTCHKKLRNTGQMMMLRSEKPLSLAGFKVYHVNLETLM…
HhalOR34	MALPTVDKKPIDEYYIGKCMKNNYGLEFWLKAGGVFSIGKNGRFIYLISGLYVIAFFMVFPLLVITAYKAAEGKELDIVCEAIHFAIFTFLEMIFLITCIVKNRVLAKIFTIMGKGFYDYENTLDEECLSVAAKTLNESKRRKKIIAKVFIVVVMCACLSITILRPIMKFLLGEHLLGKPDDGILRLIPVNMWTPFNKDSWYAMVIFYLSQDVIGYVTPGLVFGCTLFVVFACEDVGSQLIILGQSLKSVIRRAERLDMPTDEALKLCFSHSIRHHQTILMCVKTLEKLLYIPGLGLLFGSTILMCICGFIFVSKEVPFPSKFVFGMFLLSELMLIFLVCWCGENIQKTSTLIFDMVYSSEWPDNMSSMKNYVLIIQLRTIEPIKISFGGLMDASFETY…
HhalOR35	MIAVNEAKGSDKPKEWKPVSRSDLLEGLSVIHLEVFSLWTALNTYRKSSKKSYRLLAYIIFTVVVVSPYLISQILCAFYIKMDLQMAIYLILNTMPPYQAFTKMGVFWFRMEEMATLFDLLREDFLTCIPLHKKSKAKEIYRSITKRSNLFCFLAFFANTMTVVTWIAMPGFDTNLEGTGRKKIIAGWYPFPYSETPYYEVVVTYESVLMVWFGLSLCPYECFLVQLLSGLCAHFTVLNHHLATLTKEDVFGKIPENHGGVNAVMNEELKKIFDDYNKLLRYGDILKDVYNVFVTIILGMVMTDLITASLHLLFTPSDALFTVNLILFFLHSLVEIALICFTSSYVERVSFQIRFSAYSSDWYTADKKYRFTAQMMMLRAQRPLTLVAVKMYPVNLETL…
HhalOR36	GYQVIEDSDIIDGLSVRYLKIFGIWKVINDYRTSEKRNYILKFQLIITLVLAIPSIIPQYFSFLVIQVDIQKATILNFHSLPSLQVLCKLLVFWFRIDSLCKLYNLMTKDFLDKTIPDCEIESVKHIYTKMSKRTNIIVLTACIVINCGVFLLVLFPSISVDYILYHTGNMYEVTTGRKKISTGWYPLPMDKSPWYEIILVYEGLVVLWAGSFIFVFMCLYYQLLMCLHAQFIVLGSHVSTLKIESLFEELEATDRIQNVEMYKKLYRILQDHQKLISFADELRTVYNPLVTMILGMGISVLIIAVFQFLLGKTGDPMFILRSFMFLLYQCIEVSMFCYSSSFIETASSDLHFAIYSSDWYKAGTKFRKAAQMMMIRTRKGVTLTAIRMYPINLETIMA…
HhalOR37	MIKEGIKDSDIIDGLSLRYLKFFGIWRIVNDYRTTGKKNAILKLHLLGTLLLGIPYVIFQFMSYFVIKVDIQKATILNFNAIPALQLCCRMFVFTFCMESQCRLYNVLRKDFLNIPKQNLEVKEIFMSISKTSNFCCTMSLAVNGSIVLFYIIYPGVSVDYILYHTGSMAAVRTGRKKILGGWYPVPIDQSPYYEIVFAYEAIVLLWGGFFLAVYFVLFYQVLMCLYAQFSALGLQMSSLKIEQYRSDINTSLNHNYISSTVYEELYKLLKDHQKLLRYTEELRNVYNPLVTMTLGMGILILIIGAFQFLFAQTGDPVYIFRFLQLLAYQGIEVSLFCIGSSSLQTASSDLQFAIYSSDWYKADTQFRKTAQMLMVRANKGVTLTAIRMYPVNVETLMA…
HhalOR38	MDYEAVIKDSDVIDGLSIRFLKFFGMWKAINDYRTRGKKNIIIKIHLLGSLMITIPYVVFQVQSFFTIQFDIQKITFISLHALPALQMCCRLLLFWFQLNRVCRLYDMIRNNFINIPEDMKDQIRDLYIRTNRAFNVTCFVVFICNGGIQLIYIMFPKVPIEYLQHHIGSVSAVKTGKKKILSGWYPCPMDEYPYYELIYAYETFGLSWSSILVSLYFCVFYQVLMCLYAQFAVFGARLSNLKIDFGQSKKHKNIIQNNLYEELYECLQDHQKLLRYTDELRKLYNPLVTITLGIGILGLSMGAVQIILGKRCEISFLFQLIQMLSSQFLEVSLFCFGSSCIETMSTDLQFAIYSSDWYKADVKFRKAAQMLMVRSRKSSTLTAIVMYPVNLETLGAIV…
HhalOR39	MSHEPFIKDSDVIDGLNIKYLKFFGLWKVINDYRTTGNRNLFIKFKVFLTLFLAVPYVLCQYICYFFIKADLQKATILNLHSLPALHICWKILIFWLRMDSQCRLLGLVRKDFINVPKEKKKAAKEIYEKITKKANLFCVAAFILDSSVIIIAILFPGVSVDYILYHTGNVFDVTTGRKKILAGWYPLPINESPYYEMVLVYEAVLVGWGGMMLAVYDSLVCQSLMSLYAQYKVLGYHVSTLKIDSHSRRTKNGENNDSEMLKELKVILQDHQRLLSYANEMRSVYNPLVTIGLGIGIGVLIIAAVQYLFGKTGDPMFVFKSLQFLASAGLEVSIFCFGSSYLETASSDLHFAIYSSDWYKAGTKFRKAAQMMMIRSKKGVTLTAVRMYPVNLETIMAI…
HhalOR40	MSYLPPITESDVIDGLYLRYLKFFGLWGVINDYRTTGKRNRIIKFQLLITLMFAVPYIFTQYLSFFVIKVDIQKATFLNLHTLPAIQICCKIMVIWFRLDSQCRLFNLVRKDFIYIPEYNREAANKIFKEISNKANILCIAAFIVNTAVIISSIAVPGISVDYILYHTGNMDAITSGRKKILGGWYPLQMDESPHYEIVFVYETTFILWAGILLAVYISLFYQVLMCLYAQFSVLCIHVSSLRSDPDAEKKYRNRKVDSEIYKELYIIIRNHQKLLSYANELRSVYNPLVTMILGIGIFVLIIAVFQFLFGSPGNPTFIFKSLLFLAYQGIEVCMFCFGSSYVETASSDLHFAIYSSDWYKADIKFQKAAQMMMIRTRKGVTLTAIRMYNINVETMMSI…
HhalOR41	LLQHLALDRSTTSMEPPRYVDQYGELFKWQRRCGFSTPWLEKPYFYFRFLDLAYDTITISMVLYILLDYSYTMLTTSLSFQDICLFGIGFGSSACSMFITTYQILYSYRLKEITDKMDSIGKKIMENDLGGKDFFKQEYVKNAKFLSIFTRCSMTSIFTTPFSYFLSVPVVEWFEGNYREHLPLPLANVFDDRQPVVYEIVVIVLSAGISIATAKKAALDSLFISFLSIQTTFLKYLSVAKDEMSKDMRFADDGRSRRKLLTWVKLHQEVIKNIEELVEYFSPIVVVYYIVVIEIVVCGAFVELKKDNDSIVQSISVGSYVMLTVIFYYLLSNKADELTTEVQKMVAAEYNLPWYAMKKSEVSIIKVVLMMCNKPIHITAYQAPVLRLNRETFSQFIVR…
HhalOR42	MDPTHFLPKLSTSMEPPRFVPHFRALLRWLTWCGMATPWIKKSFSIWRLLNLLYDLMLMALVTYIVFCYVYTIMTISVGFQDLCGLGVSASNYMCGFFATIHQCLLKDRLKVLTDKLDKIVLDIIRSGLGEEQAFLELYNNNSKTMAVLVNNSVILAAIGTLIYCLSVPAMDWYADQYRSHFPVLIESPFDERVPVAYEIVVFLVAACMIVSIAKKIVTDCLLISLFKIEIAFFKYLSLSLASMKKGFLKGDNAFIDRKLKLWIGIHQSVLRSVDELILISSPMVIMYYVTVISIVVCGTFVQIMKDNENIFQSLSITVFISITLLYYFLLANTADQLTAVAQNVAHAAFDVPWYQMEKKHSTMVRMVIAMANRPIRLTAYRAPIFVLNRENYAGFVVS…
HhalOR43	MIYQDAIKDEDIIDGLDVRYLKFFGLWKIINDYRTSGKRNVVVKLHLLLTILVSVPYVFLQYMSYFFIDVDMQKATYLNVNTLPAIQACCKVLVLWTRLGSICKLSGLMKKGFIEISEENKAAASEICKKITYKSNILYKTALCMNAGSAVVYLLSPGISVDYILYHTGNMAAVTTGRKKHLAAWYPLPFDNSPYFEIVFAFEALLISWDAIILVVYICMYYQILTCLYVQFTLLGLQMSSLKNENIKKKDNIIKQANRTTYDKLYRALESHKELLSYTNELKTVYNPLVTMILGIGIFVLIMSVFQFLFSKTGDIMVIIKSLQFLGFHGLEVSMFCFGSSAIESASSELDFAIYSSYWYEGDNRFKMAVQMVTMRAKKGMTLTAIRMLPINLETMVSI…
HhalOR44	MEPPRFVDYYSGLIKCLMYWGMPMPWWVQKPSKTVWLLLVTYDTLTLAVTCFALYLYVYTVTLDDVEFEEVNVLPPAICFKLCVLGISLLQFLDRGRIKQLSDDLDAVVRTIIETDLDQDESVKESFIQMYSKKSKFLVNYCRTMPFFAVSYYVIYFGSVPLIDWSEGIYRSHYPLPLLTPFDGRKPGIYEFLVFVVLISLTMVSGKQINNTCIFLAFFNVLRSFLHYLSLTMSEMQKISYKERNDPSIRRKIRVWIQIHQEVNRNLQVLLKIFSPVVIIYSIYLLLYLITAIFMQMQKKEENIYQTAAEGLAVIGMVRQIYVIFNTADQITTEAQKLANAAYELPWYQMDNSMRSTINMIMMMCNRPVHITGYRAKSFIVNRETIAGLMTSAVSGYLT…
HhalOR45	MDNQGAILDSDIIDGLDMKYLKFFGLWKIINDYRTTRKKNAILKFKVITTLLLTIPYIVSQYLSYWMIEVDIQKATFLNLHSLPALQICCKVLVLWFRIDSQSRLFDLVKKDFFGIPKSKEDEAKSIFSKMTSECNKLCSAAFLINTSVVILSIIDPGISVDYIMYHTGNMHAVTSGKKKILGGWYPLPIDKSPYYEAVFVYEILLIIWGGILLAVYVCLFYQVLMCLYAQFSVLALQVSTLKYSYIQDGKGRKSVNSKLYKELYEVIKEHQKILRYAEELRSVYNPLVTMILGVGIFVLIIAVFQFLFGSTGNPMFIFRSLQFLAYQGIEVSMFCFGSSYIQNASSDLHFAIYSSDWYKADVKFRKAAQMMMIRAKKGETLTAIGMYPVNRETLMTIL…
HhalOR46	MQYQQPLRGPDVIDGLSIWYLKLFGFWKIINDFRTTGKRNLFFKFEFIMSILISFPYIACQFSSYLTIDVDIQKATLINFYCLPAVTMCSRILVFWFHADSQCRLFNLIKKDFLCIPENKKAETRKIYRRVSKSCNMMCMFAFVLDLSVVFTTVGIPGIPVDYILYHTGSMFDVTTGRKKILCAWYPLPMAEYPYYEIIFVYEMMCVLLGGIYLPIYASLFYQVAVALHAQFLVLGYHVSTLKINPNIKQKKKNMSSGITEDLYKILLDHQKLLSYADELRSVYNPLVTINLGGAIGILIVSVFQSHMGETRDIVFVLKSILYAASIMIELLMFCYSSSLIQAASSDLHFAIYSSDWYKADTKFRNTAQMMMVRAKKGVNLTAIRMYPVNLETLMSIFQ…
HhalOR47	QQGIADSDVLDGLSIRYLKFFGLWSVINEYRTTGKRNGIIKLKLFITLLLSIPYIFSQYLSYFIIEVDLQKATFLNLHSLPALQICSKVLVFWFRIDNVCKLYNLIRKDFLSLPEHKRDGAKCIYMKITKTSNMLCKAAFIVNSSIVALYVMQPGISVDYILHHTGNMAAVKGGRQKIMHGWYPLPIDRSPYYEAIFVYETMLIIWDGILLAVYDSLFYQLLMCLYAQFTVLGFHLSTLKIVASQDPNSRLNDSNSPIYRELYKIIKDHKKLISYANELRSIYNPLVTIILGMGIFVLIIAVFQFLFGGTRSPLFIFRSLLFLVYQGIEVSMFCFGSSSIEKASSDLQFAIYSSDWYKADIKFRKTAQMMMMRARKGVTLTALRMYPVNVETIMSILQF…
HhalOR48	MSYPAEIRVSDVIQGLDIRFLIRSGMMRFINDYRTTGKMNPMIKIHLIGTFIISLPYMVFQCLSLFKVQYDIKKGTFVILHPMAAFQIYCRILVLWFNIERQGKLYNIIRKDFLNIPKEMSHDASELYKKQNRTSNLCCNATFLWNASIELVYIFFPGVSVDYIENREINKKVVNTGKNKIFSGWYPVPMSEYPYYEIIYIYEAMCLLWASTLLGLYFCMYFQLLMCLCTQYVALGYRVANLKIDPVIYKLDKKYKSSIYQELCQIVKDHQKLLSYTDELTSVYNPLVTMTLGIGIAVLIIGAIQFLLGKTSDPEIIFKLIQMFSFRTFFEVSMFCFGSSRIEEASSDLQDAIYSSDWYKADSNFKIGAQMMMIRAKKRVNLTALFLYPVNLATLGSIV…
HhalOR49	MFSWCSRKNASLSENCDEKSEKYHIKKAFEENYGFWMIFGGFYPCVGILPCIYIPSAVFLSIIFIMTTVNISNSEIAIKSESVHFIVFITIELTAMTVFIFKKKTIDEIYRAMGRRFYDYENTLDEECYDVIANAYKSGRSRKKIFHDMFVGCSMSTLLTASIVRPLLSYFKGDPDPNDGILRVLPVPLWTPFKTKTWYVNLLFFLAEDVIAYMTPGIVFGCILFVVCASEDVGAQLIILGHTLKSVVRRAEGLDMPREEALKLCFVHSIKHHQMLLKYIKSLEAIIYLPGFVLLFGSTILMCMSGFIFVSKEVAFISKVEFFLFLLSEMAVIFLICWCGEFIQTTSTQIFDMVYSSEWPDNMESMKNFVLIIQLRSIDSIKLNLGGFMVASLETFGNI…
HhalOR50	MSLSSVFGNMLQIFLNEPSDPGKGQVYEDSRSFRRGLAIWKSKTRIVIPSLLILFMEFIMFLSVIMDAVTRPNLDWVDKIAEFCFIINTLIFYSITYFLRDDMDRLSESVDFWWSHTFLKQTREDLKKSSIQWMETFNNYFMSLLALTCTGYAVLPLAIFAISESKSYSELNIFKMWAPFLQQHLWTILLLYAFQVACIFFQFFGYGVLTAYMMSVSVACKYQTRLVEISCLTIKDRVLALVRKEQDISERKTLFCTIFLKEIAESAKHYQHVYRNWKEMCRLLSRMADVVFYSGMCIVIMFGVRVATQQENSSVILNSFLFIVVVICNQYLFTIINGTFTNQVISIQNSVYNCPWYTLPVSCQKSINLFQIMVSYIPTLSTFMGVEASREFFGRTINA…
HhalOR51	MNQQAPITDSEAIEGLNIKYLKFFGLWKIINDYRITGKRNIMLKVQLVVGLMFTVPYVVFQYISFFFIDVDVEKMAFLTLHTLPGTQMCCEILLIYFRIDSECRLFNLIKKDFIYIPENKRDLAERILTKIGKNSNILCIGVFLVNLITLIFAVNFPVASVDYILYHTGNMDAVTTGRKKIFGGWYPLPMDKTPYYEIIYFFEAAFHLWAGMLLAAYISLFYQVLMCLYAQFSILSLRLSSLKVEKENSQDRNGDSKIYKELYMIIKEHKKLLSYSNELRSVYNPLVTMVLGIGIIILIASVFRSLFGTFGNPISMFLSVMFIAYQGIEVCMFCFGSSYVETASSDLQFAIYSSDWYKADIKFRKAAQMMMIRARKGVTLTAIRMYPINLETMMSIFQF…
HhalOR52	MSDHTPIKDSEIIDGLNIWYLKLFGLWKVINDYRTTGKKNSIINLQLTITLAYSIPYILCQLMSCYFIKMDLKKITFIFLLTLSKIQICIKVLVVWFFLRIQCRLSNLMKKDFIDLPEHKKSEAKQIFKKIALQTNLLSIAAFIINTSYYIVSIGFPDTPVDYILHHTGNTFRATTGRMKIVGGWYPIPFDKTPYFEIIFFYEASMMMWVGTFLAVYVSLFYQTLMCLYAQFAVLGIKLTTLDSGDGKEKIWKSDSERYNELLAIIKYHQKLLRYADELRLVYNPLVTMILGTGVFVLILAAFQFLFGTTTSTIFIVKSLIFLPYQAIEVCMFCFASSYLETASSDVLFAIYNSDWYKADIKFRKSAQMMMIRAKKGETLKSVSIYPINVETMMSIFQF…
HhalOR53	VEMELEEGMYRSGFNRIVSFVTCMRGPLENPGKGLWYGKLYIAYITYIEFAVIVNWVTIGTVFLKPGMTVEVRCFTGFPVVASAFCCIRRVDMFLNRQRYKKLMEDYLSLYDNSPELNKDVLHYAKIIGNIPRILFFITALPMIIMGVIPILVAIVGGVRVIPMLAVFPFDPTEYFFVFCATVLLQITGGYTCTLRALCFENMFNMFACRQLALIRQLSRELRRILKIPHVDDSGELKYQNDEGILYSPEEAKNVVIEELKQWVKNHQKSMRMAKELQDMYSISLCIQFAFTGLLLCTTAFVMANKVGGMMNLFFCGAYLIGLFIELLITCRIGDLILYESNMLERTVEGTHVYVLPSDVYKNWLRLILTRAKVPTRLSALGVFPLDMETYKSFIVLTY…
HhalOR54	MEAMRDSDVIDGLSIRYLKIFGIWKIINDYRTTGNKNMILKIQVIVTVMLTVPSILSQCLALLVIEVDIQKATILNFHALPALHALARHLVFWFNIDSICRLYNLMRKDFLEKTVNDIEREKVDFIFRKFSKETNRTCFLVFMVINVAGSFILLCPGISIDYILYHTGSMSAVTTGRKKLSTGWYPLPMDTSPCYEIVVLYEGILVTWTASSIIVFMCLYYQLLMCLHAQFAMTVSHVSTLKIDYEYEKNNIESSFTNHQVYSRLYRILQDHQKLLSYAAELRSVYNPLVTMILGVGMSVLVIGVFQFLFGQTGDLVFVGRAFLYVLYQSVEVSMFCFGSLFVETASSDLQFAIYSSDWYKADIKFRKAAQMMMIRARKGVTLTAIRMYPINLETMMSI…
HhalOR55	MGCLGPIADSDIIDGLSIRYLKFFGLWKVINDYRTTGKKNSIMRFTVIISFILAVPYVLFQYLSYSSIKVDLQKATFLNLYPLPALQMICRILVFWFRMDRQCRLYNLLKKDFLHIPENKRVLVDKVYQKICKTSNICCTASMIVNFSIIGLYIFNPGISVDYILYHTGNMDAVTTGRKKILGGWYPLPMAQTPYYEIIFVYEATCVSWAGILLAVYFCLFFQVLISLYAQFTVLGVHISTLKFQSNKKDRKCDTKMFKELSQILRDHQKLLRYTDELKSVYNPLVTLTLGMGILILIIGAIQFLLGKSNSPGFIFKLLQVFIFQGVEVSMFCFGSSFIEMASSDLHFTIYSSDWYMAGTKFRKAAQMMMIRSKKGETLTAIGMYPVNRETLMTILQFT…
HhalOR56	MFGPSQMNVFFEERPHNHEGLTSWKLRRAVSYFIAFVYFPTFCLIETTGILFGRNSELEEVIFAIAYISFMVQMVIKLSYFHWKIEDFRELCLQFEYFHTSRHRPDFAKGYLEEASDSLRRTAKVYNFVIYVNLILWNLNPLVVQPVRFVLNLTGFTDDKDATLIPDIFPVVYMFDETKTWYLRTLTGCLEWIVLNAGLCHAVALELFFMSLFLMLAAEVEVINKSAQSTEELGREIERDYSTLLGPRDDLDRIDITLLIEDHRIVLKKINKVSDIMNPLLGLAIGYCMVVLPTLGVVITKAIRDAKSTTEAFLNIITWIGATITELLVLFMYSWICAKLKDSEEGISEAVYSTNWYERDIKYKKTVLFIMMKSLRPKKMRMLYCGDMDRETFVVGLKG…
HhalOR57	MSYQDVIEDSDIIDGLSVRYLKLFGLWKVINDYRTTGKRNKIIKITVLVSFILIVPYITFQCISYFKIKVDIQKATFLNLNSMFALQLCCRLLVFWYRMGSQCRLVNLLKKDFLNIPTQKRKAVDEMYKKISKTSNICCTTYMISNVIIVVLLIAKPDTSVDYILYHTGNMDAITTGRKKILGGWYPFPMNESPYYELIFIYESICSIWTGLLLVVYFCLFFQVLFSLYAQFMVLGLHIGTLKIEDQDQVHKNDIQMYETFHGILKDHQNLLRYSEELISVYNPLVTMTLGMGVLVLIIGALQFLLEKASPTFIIKILQVLMFQGVEVCLFCFGSSFIETASSDLQFATYSSEWYEASKRLKTSVQMMMIAAVRGVRLTAIRMYPVNRETLMAILQFTY…
HhalOR58	MFSYSHLNVFLDEHPKGDVYFWKLKRYVTYFFLFLYFPIWLVIEVSGMFLGRKGDLAQVAFDLSYVAHIVQLVIKMGYFLYYIEDIRCLCLRFERFHTSKHRPIFSRRLLGERGQFLRRLASTYYTVIYMNFLFWIITPLFIQPIIYGLTQAGFIAPAGPQNIIPKFFPVRYPFDETSTRNRIIIACMEFTVLSAGFTYFIPIDQFFVSVIVMVCSEIDVICKSVMTSKELTKELDRDYSLLLGSEDTRDRIDLKLFIEDHQRALRTTKKIGEVMNPILGLVVGNCMVLLCTLALVITTKMKTASSFSEVFREVFGFIVVMTTSLITLYLYSWMCGELKSSEEAVFGAVYSSDWYNRNKDYRDNVLIVMRQSYTSRPLRMMSMGDMDKETFIKGLKGIY…
HhalOR59	MSDQAIKDSDVLDGLNVKYLKFFGLWRVVNDFRTTGKRNKILRVKIFITLVLVLPYILCQYLSYFVIKVDIQKAIFLNLHLLPGTQICCKIVVFWFKIESQCKLFDLLKKDFLSVPEEMRPEAAEIFKKITRRTNKLCLAAFIVNISIIISSIADPAISVDYILYHTGDMAAVTTGKKKMLGGWYPVPMAETPYYELIYVYEAVAGTLGGFLLAMYVCLFYQVLMCLYAQFTILCLKTSALKIKSDNGRINSSIYKELNEILKEHQKLLSYAKELRSVYNPLVTLIIGIGLFILIIAIFQFLFGGKSDFMFIFKSLQLLVYQCVEVSMFCFGSTYIETASSDLQFAIYSSDWYMTGMKFRKEAQMMMIRATKGETLTALRVYPINVETIMSILHFTYSA…
HhalOR60	MLKLNDYADPKDEKYFKTGFKKNYGIWLLYGGMFLGNPLLPVAFILSGFILIYFMLGTITKFYKTDLLCAIENLHFLIFVTVELVAMMSFLQKRAVLVSMYITIGKGFFDYENTLDDECLELKRDAYDKTDSRKRLVHHSFVTVVMSACITISVFRPAVLILFPKENMGNPNDGMIRVALAPMWSPFDNTQWHGIVIVWLLEYIVAWTTPGIVFGATFFVLFSLEELGIQLQILKKSLTNVIQRAERLEQGMEENIKLCLKYSVRHHQLLFEFHDKLNEVISLPGLGLFVSFSIMLCMSGFIFTLKEVPLVSKSVFGLFLLSECAMLFALCYFGENIIELSEEIGDALYNSDWAIYSKVMQNYMLIIQMRSRRTMRLTLMDFMDVSRNTFSNICSTSYS…
HhalOR61	ESNLFQHSGSDRVKLLTMVKIIKELLGDLPRILVKTFLISRDSKKRTGQTFVTISNAIMTLVCISSMYFLGLEKSLEGTASFSAYAFIIATKHVIYYFRQDEIKRMLNIFARLQKEYKEKWEREIFKRDYEDTWNMVYKFCLIMISYQVFYLMFTISVDYIIGNIFPNFPSVRVHLPCDGFIEFFEPRTLGRFIITIPVLMWTAEAITIHVGSETLVFVLMMYTKSELKMIRYRLIIIKKQLNRNKSNRSVNAEMLLWEVIQRHQRALDVLDVMKDTLGLPLAIHYTSVSVTLSVIFYCLMTFDERGTLTAKFNGITAIICIGSLLFALCYFGESLEEENNEINKRIYDLPWYNESIFVKRAIIIMLRQTQKPFVINYRLTAQLSLQTFMQVINTAYSY…
HhalOR62	MAKLNGYTDPEDEKYFKIGFQKNYGNWLIYGGMFLGSPVLPITFLFCATTLIYFMFGTAIKFYKTDLVTTIENIHFLIFVAVEIGAMIVFLRKRALIVSIFITIGKGFFDYGNTLDDECLELKRDSYHKTDSMKRLIHHTFVTVVMSACIAITICRPVIIMMFPKENEGSPDDGMVKVALLPAWTPFDKSRWYTTVILWFIEYAVSWTTPGIVFGATFFVLFALEELGIQLLILKKGLNNVIQRAERLEQTMEENIRLCLKYSIRHHQVLFEFRDLLNEVVSLPGLGLFVSFSIMLCMSGFIFTLNEVPLVSKFVFGLFLLSECAMLFALCYFGEKIIELSEEIGDALYNSDWINYSQVMKNYMLIIQIRSRCTMRLSLMGFMDVSRNTFSNISSTSYS…
HhalOR63	MEPRRPLQEASILEGLATMHMKFYGLWYCLNVTRTTGKVSRLFILVCALIVIIASTYVMFQIIYMFTIHLDLQKIAFVYLIVAPCMQDFYKVIFFLAKMQEICLIYDTLLVDFLESIPKHKMPVVKEIYRRTAKKCNQVCSFAFSGLIIAGSIWLFVPGYDTDDPTSDRKKVLNGWYPFHYSESPRYELVYAYECIMTLWCGGWYCIFECAILMPLICLCGHFDVLSYHIATLKKSDMVHVLGRSSASHLESNAFLNDQLKYILKDYEKLIRYGDTIRETYNLVITIILGVEIGNLTVIVLHLIFEDKDAMFLVKTGTYMSFQLIEVILICFSSDMMGEASSGIREALYCNEWYTTDRKLATSQQLMMVRASVPLTLTAVKMYPVNLETLLSIFQFIYS…
HhalOR64	MDPPRFTDYYRWMLKSFLYWGMPTPCLPKLSNPVWLLLVVYDFLTLAVILFALFVYGFTMARGNIGFQDVTLFLPGFVLYSFALYLSLYQFLIKGRLEKIIAEMDALARDIIESKLGDEEFLQVYSDNSKNIINHCQTLPFLYVSISFIFFCSVPIVDWYEGKYRTNFAIRIETPFDYRQPGIYELVVLLMSLALSISTSKQLNNALLFLAFFNTLRSYLKYLYISMGELKRKTIKNDNINNAFSRQDIRTWIKIHQEINRCLQVLLQLFSPVVIVYCLYMMFFLVSALFLQMQEKRNSIYQTFSAFIGVMVMLIQFYMVFNIADHVTFEAEDLANAVYGLPWYEMDKRTKYEVQMIITMCNRPINITGYRTKSLILNRETLAGILTSAMSAYLTLCQM…
HhalOR65	MADLDDIIVDERKTRKFLRLVCCLRYTQGKNSISTFNLLYIISVYTLLLIVVVQGVVLAYSTDDIVQKVESIHYVLTIIIVISYMSNELYNNSNLDQAWKLINLAYNEFSKDRDENRQIHVEINVSSVKTNKLFCFLMSSSCVGYLLFAPMRQLFTEEDSSARKLPVPLYMPFDTSDNFGFSLGMAWEAISLFYICGVSTSIHQSFRGIMGRLRGELKLLNNSIKGIHVRAEKYQGKVDDTEKLEAHFQFLVYKCLREDIVHHQMLLEYYSLTKIYLGTILLLFIFLSSIILGAVGFLITKPNSNTEDIIKFLAIVTAELFFVYQLCWEGERVAEESGQIFNNLFNIPWNAYDRNVKGCIRIMLCGTIKPIRLKTSIFNVEASLETYNWVITTAFQYFN…
HhalOR66	WLHIMSLQFETTHSFLIRVLRRSGIKMPWVHLDSNLSTFLYSVYDSFLVFIGFYQFIFAAGSIVWVGNFQDMCNLVAIAVTLLTGILISLFYLLYQERLALFVENWNKLNIKILKSRLDRGFKMMYLKIAQSNVSFSKKILFLVFWTPFIYCSPVPIIDVIRGLYRANLPLPILYPYDDHQPGLYELTFCLHVSGLVISVMKKIGNDCFFLSLFKIHTVYLRCLSTSINDSKDKFNMKSDLFIKKKQIVWIQLHTEIMRNANELVSIYTPIIVIYYFNLIMIVVFGLFTQIKNDRDNFIQGFGIGGFGIINIFQLYMMCSSAEVLATESERVALAIYDIRWYQMNRSNGEMLRLMLFMAKNPVQVTAFRARTFLLNKESFIGFITSSLTALMTFTKIND…
HhalOR67	MVYLQRLQKSDLFDGLNIGHLKFYGLWNGINDYRSTRKTSCIFKFNMTVSALYVFPFVVFQFICIFIISVDLKMATFVYMNGVSAAQVLFKIIVFWYRFKDQCDLVDLLRVDFLSSIPDSKTRHVNEIYKKNSLRCNIFTILAFTGNVLTIITWTILPGFNTEKTGTGRKKILSGWYPVTYSESPWYEIVFVYEVILICWHGSLVSLYESFLLMLLVGLYSHFVVLGYHLSTLKKNDKAVVKAGVDTKIDEAFNIELKKIMQDYNKLLRYSTLLRTTYNAITTVTLGLDIGVLILTIMFLMFGSSDGLSTFKMMMYFSFALIEITLLCVTSSIVGSASMSIHDSAYSSDWYVADKKFATTAQMIMIRSMIPVSLTALKMYPVNMETMIGIIRFIYSAVA…
HhalOR68	MDTKNQAKRHNNGPGLVEETSQLFLNGLRRYKSESPLSIPIPLIVAVGNIMVCLMVTGGIVNYTKTDWVQLCINLIFIPVSVMVGTMILKYKRSFSWVNKEIDSWWSYKLLGKETDVMKKNAAEWMAWYGQYYYIGMYLAWVMNLVPFIKCHIWGKSEDPMNNLMYPCWTPLDLGTWWGFVLTYMFQFMSMYLSYFTFGNTCFYLTTAYISIGYQAQLIGLAILSVEQRCRKLSDENKDSSKREEIYESYVKEEIKSCIKHYQQLQRSAKELSNIFSTLAVLSYNIGIVVLSISGIRLTTETDKLMLVNSFVNTCVTLGNQFIISFICELLTEEVEKLRKIIYYSSWVSMPVSCQKYIYTFLMMVDYMPTPVTLTGLKTNYENFSKVVNSAYCYFSLIL…
HhalOR69	MDPPRFVDHYRALYIGMRTFGMATPWIQKPRSLWRRLPFLLWDTLLVVIVVYMLFCYAYSIMTISIPFQDLFGLGISTTNYICALSVTFYHALYGPRLKKITDNMDSIAAVICANNLGGAERFHKRYATNSKLMSVFTTLSIHFSAYLPFTYFFEVPVTDYFTGKYRSRFPVKINSPFYDREPGVYELVLGIMSLCVSSSIGKKTATDCLFMTLFMIQRNFLYFLSDSMKDLEKEFLTGDNKLFKKKLSIWIKLHQDIRRNAEELVLTFSPVIIIYYVSVIGNIVCAAFIQMKKDNDSMFQSICMSIYVMVALTYLFLLSDAAGRLTVEAEKLAFVVYSSPWYESNKTNTDTLRLVVTISNKPIHVTAYKAPVFLLNRETFLTFVASALSAFVTFSQMK…
HhalOR70	MDAPKFVDHYRSLLRGLRRVGLATPWIEKPTLLSRVPFLLYDGLLVAIVVYMLCCYGYSITTITIPFQELCGLGVSTSNFICALLVTFYQAHYSQDLKRITDNMDRIAERILTSDLRGADHFLQLYKRTSKLMAILTDYSIFFSFTLPIVYCFPVPVMDWMEGHYRSRHPVRIANPFNDKIPGVYELIAIVVACSIAFSTSKKAAMDCLFVTFFSIQSDFLKYLSVAMSELQKELRDEDSPLTRNKLITWFRLHQDIIRNTNDLIETISPVIITYYMTTIGIVVCGAFVQSMKENELFIQSISIGGYIMITLIYYFLLSNTADELTTEAQKLAFVVYSTPWYDMKKRNADMVQLVVTISTRPIEVTAYRAPTFLLNRETYAKFLVGAISAFITLCQMKF…
HhalOR71	QLEGNHFSLHQRMKEVDIDSRYFRAIGLWQFVVDYKATYWVLFNFALASVFFVNISVQLMNTLTGGYEFSLLTEKLSVNLTVMESVIKIIYYCAKRRKLYSLSLCFRRDFLICRNHDREVADEVLNTGFSSVNTVTKGFVVMIFTTVGLWNSFPFLRCLTGDCSKWNIMPSWYPEAMDGLPAFIYIFEFFIMVFCAALLYNVNCFFSALALSLSSQFQLLTKSFSSIETNAERRKGCKIYNMNVLLRECLIDHQRLLRLVKEMEDMYNPIFLFQMLTSTFTICLVLVQLNDRTSSKGEMPVAMVCKFFMYLMFGSMELLVYSWGGQIIYDQTGEVHRSLYESGWASASHYFRKSVLIAQIRTLRPEYLTAGKFYAVDLASFTQIIKASYSYFTFLHGSG…
HhalOR72	HMPAPKFVDHYRALLTGLRRVGLATPWIEMPSLLGRLPYLFYNSLLVSIVIYMLCCYVYSVTTITIPFQELCGLGVSTSNFTCALMLTFYQISYSEELKRITDNMDRIAERILSGELAGAEHFLKLYKRTSRLMAILTNQSIFFSFALPLVYSFPVPLMDWMEGHYRSRHPFRIASPFDDKLPGVYELIMLIMTCSISYSTSKKAAMDCLFVTLFTIQSDFLKYLSVAMTELQKELKIGNSTQVRNKFVLWFRLHQDITRNTEELVEAFSPVVIIYYMTTIGIVVCGAFVQSMKENEMVVQSICMACYILITLVYYFLLSNTADELTTEAQDLAFIVYSTPWYDMTKSYADMMRLVITISTRRIEVTAYRAPVFLLNRETFAKFIVTAISAFVTLCQMK…
HhalOR73	MDPPRFADHYRPLLGWLRTCGLSTPWGEKPSFALGVIITCYNTLLVIMVCYTLLLYFYSILKNSIPFDELCLLGVGFGLYGCNVAVTLYLFLFQGKLKVIINKIDSIAATIQQNEIGGSEFLQEMYKKHAKLMVVLANNSIYFGYLTPMIFCLSVPTMDWYAGNYRANLPIQIDAPYDYHIPLVYELMVLLLSCCLAVSTTKKAATDCLFMSLFNIQITFLKYLSITKSYIQDDFKSTNKTFSKRKLIIWIRLHQQVNLNIQQLVSIFSPLVILYSVGTIMIVVCGTFVQIMDDNNNLMQSISIGIYVAMTCLNQFLMSRTADELTQEAMKLAFFAYDLPWYEMKRADADMVRMVILRSNRPIQVTAYCAPIFMLNRETFRGFMVTSISAFVTFCQIKD…
HhalOR74	MDPPRFIDHYRGLLKWLRICGLASSWHHQSNFFSRFSFFIYATFLVIMVSYVILCYIYTAMMTSLTITDVCTFGVSGGCYVCGLLVSSYLIRYKDRLKKITDEMDIITKKIIESELGEREFLLNEYNKNSKLMAVLTDGSLYLSFATPIFYCVSTPVLEWYNGMYRSNLPIQTLSFFDEKAPGCYELMVIFTACSIAISTSKKSANDCLFIALFRIQTIFIKYLSVSKGALEKKLLADDSLRGQRKLLAWIKLHQDIMKNVEELIIYFSPVVIIYYVMVVEIVVCGAFVQLEKDNDNIIQSISVGSYVATTVLYHFLLANTVDELSDEAQKLAFVEYCLPWDKMNKKNISMVKFVLTMCNKPIKVTAYRAPIFLLNRETFAGFLLSAISAFVTFSGMKH…
HhalOR75	MDPPRFIHHYRPLIGWLRKCGLPNPWAETPSTPRRLLLFCYDSFLVIMVSYMISVYIYSIASISISFADLCSLGTSGCCFMGSLFITLYMALFRKRIKMVTEGMDSIAEVIFQNELGGARLLQEMYQKNAKLMAILTSNSICISFLAPCTYCWSVPFVAWLSGTYRDELPLPLDTSYNYRLPVIYELMVMLISCSIGISTSKKSAVDCFFISLFNIQIDFLKYLSVSKRYLQEEFNSGKDIYIRKKLIMWIKLHQDINMNIQQLLTVFSPVIIVYNLTMVIIVVCGAFVQIKSDSNNLIQSLSIGAYVAIAGLYYYLMAHTAEELTTQAENLAFSAYDLQWYSLKKADIDMLRMVILRANVPIQVTAYCAPRFILKRETFANFVVTSISAFVTFCQIKD…
HhalOR76	DPPQFVNHYRTLIRGLRLSGLPTPWIEKPSKLLRIPYLLYDLLMLTIALYMLWCYLYTTIQGKLAFDELCALGVGISLYTCSLLVTFYHFLFGHRLQNITENTDRLAAALLRSGLNRGHSLHQLYLKDSSAIAVLTKNTILFSFFCPVLYCLSVPVMNSIAGRYRCEQPLPITSPFDDKKAGIYELVALVLAISNAISCSKKGVNDCLFLALFRIQSSFLQYLSTSLENLQKEFLIESNDWNRKILIQWIGLHQEVLRNIQELVRIFSPVVIIYYLNVIGIVVCGLFTQTMNDSGNVMQSIGVGSYVLVTVLLMLLLSNTAEDLCTKAQRIAFVAYDVPWFEMDKTNADMLQMVINNSSKDIHVTAYRAPIFLLNRQTFAAFIINCIKAFVTLVQMKRC…
HhalOR77	MDPPRFIDHYRPVLGWLLKCGLSTPWAEKPSLCRRLLLLCYNAVLVIMVCYMLFLHLYSLTQISSPFPDLFHFGISGTLYGCSLSITVYLALCRERMKTITDGLDSIAETIFRNELGGADFLEQLYKKNAKVMTVLTNNSLFISFITPVTFCWSVPFISWLAGKYRSRLPIPIESPYNYRVPIIYELMVVLMSSCLIIASSKKAVADCLFMSVFNAQITILKYLYVTKRYLQVGYDNDIMVDRKKLVLWIKLHQKINENIRQLIETFSPLLIIYSVGVITIVVSGASVLVMNDNNNLIQPISIGTFIAITVLYYYLLSNTAEELSTEAQKLAFMAYNLPWYQMKKADADIVRMVILKTNRPIHVTAYCAPVFLLNRETFNAFMVTTISAFLTLSQIKDR…
HhalOR78	MDPPRFIDHYRVLISCIRRSGLPTPWLEKPHSISRVLLLIYDSIIIIMLLYSVVCYMYSIMTSTISFQDLCSLGLSGGCFVCALLINFYQIQYRKELKHITDTMDSIAEKIIESGLADKDIFVKEYTTNAKFTNNLIKYTLMSMMTTPFIYFLSLPIFEWYAGAYKAHFPVPIENFFNDRLPGVYELIVITIAASISYSSAKKASNDCLFICLFKIQTTFLRYMTLSKEVIEKELLAGNKNSQRKLLIWVKLHQEIIKNTKELILIFSPVLIVYYVMQIEIVVCGAFVEIKKDNDNLIQSISVGSYVALSIIYYYLLSNTADELTTEAQKLVFMEYNLPWYEMNKRNASMVKMIMTMCNAPVEITAYRGPTFLLNRENFAGFMFATLSAFLTLCQMKDI…
HhalOR79	MENQKRRMAKINLDIIAEATRKLRIIIGLSNIMESYKLFSLITFINSIGGCCLLIYSFYHFRHSSDDLAGVAYNFGLLNGVVVGSVSGHLGKIKLFKIVDDSYFTYDYQSSIMKKKIEELEKPRAKALKRFFKTLLILTYAAQANLTGLTVLIGMIKKEEIYLFPCWHPFDLSNILSQIFLLAWQQFIILGITFVAFGCWGILYITYSHIKTEISLLDFAIRNISSRAREMMQHRESVEKGEDYDKILLACYKQCTRMCAEHHSEIIRFFTNGQDFIGIFYTTAFISGGSACTFGGYYISSENIELQFKYLAMTTFILTYLYILFWIAEAISGKFFTIAQTVYTLEWYNLPKECQSTLRLMQIRSNHPLFYKLVLGQRVDMEAYMSLVKATYYYLNIIIT
HhalOR80	MSLQFVTAQRTVIQGLRNTGISLPWVEDDSLLTNALRKFYNFFAFFIVTFQLVDTAISAIMLENFDDKCRAGTVTSIESNPTMLSVYYVFYHVRIKKFLEHSDALSQRILNSELGQKEFFEKSYLENAKKNNFFTKIVLIFVFWTPILYALPRPLIDLYNQEYRKTLPMYLVYPFDDHKPGFYEMTFLIQTLGLVCGDLKKFANDCFFLSLFRTQTVYVKYMSASIRDLGEEFKKTGDLNLKKKLIKWIEIHDHFIRNFNELLSLYTPVICIYYANLICTVVLCIFTQLQEKNFGIIEGIGLGGFFSANVFQLYLQCAANDDFIVEADNLALEIYKTPWYEIDKTNKDIIRTMFLMASRPVEITAFKSPTLRLNKEAFLAFVASTITAVMTFKNMSDLHQ
HhalOR81	MSLQFETTHSFLIRVMRRSGLMVPWVRMDSSLLAAFYFFYDNLLVLIGFYQFIFSVGSIVRIGNFQDMCTLGIVIAVLATGVMLSIFYIHYQQRLEKFINNWDNLNTKILNGEPQLAKYFQRLYLEITKSNETFAKRILFIAFWTPFIYCSPVPIIDVIRGSYRTNLPLPILFPYDDRQPGLYEFTFCLHVFGLLISVMKKIGNDCFFLGLFKIHSVYLRYLSESIKDAKKKFANNDWFIRRKQIEMIKLHTEIIRNAVELVSIYTPIIVIYYGNLIIIVVFGLFTQIKNDRDSVVQGFGVGGFCLINIFQLYMMSSSAEELASEAEQVVLAIYNIPWYQMSKRNADMLRLMLLMARNPVKVTAFRAPTFLLNKETFISFIVNTITALMTFSKMNDRRQS
HhalOR82	PDFDEMELYWNRKNLADVWTWPHIFWLNIFGWWGEEAKTEFGRKWLTRFRSLSIVYFACLITSMMIQVYIKFAEGDIMQNLFTIFASGPGMVGIFKFFDLVIHRKILKSIMGRLSGLISEVNDPILNTMTRKAFKKTWIIFLSTLLVFDSVVLHWALRPIIAAILHKEKTRIIESWPVFLDTWTQFFLSYLFQVPGVILLGHSFYIYDNLYFCTSDVILCHFEILKHKLNRLVLNENEKSSKDLVSCVKYHSAILSVCNDFRDATSKVIIWQSINTVIMLCTGIFILTYLGKNINSNALMNLGEVSFTLCTCLYYYCWFSNEITLQCTKVSNAVYMTNWISAKSSDKKIMLITMTRAMHPVMFGGIMQINLSTFINVLKTTFSFYNFLIAVQVSSTKNE
HhalOR83	MFDPVKIYFNILIKSFSFVTGEEKMSTWTFHKGLLRLLGNDWLVRKGEISLLRIIWLVLYPIAYITSMISITTLTIKYVLQREHPTMLDYTRAMNGVVACIAFVYAICKSLVLKLFGKNLWHLMDMVDDLGEVDEIAEPHRDSSVRHATLYLGLLCLIPATWTVCSMFYMHNIPFPTDWPWGDYTPFRYFISFTIDFIAATYCAVTHSTYDTIFPISAGAICGHIASISAKMENLGRTGDKEKDKKILNECYRLHVALLRISDHINNTFGLVFLIQSIYTVLHACVIIYQVMKVSDITLAVLNTAPILASSYAQFLLFCYYGELLTDYFERLRFGFYNNHWYQLDMELKKTLVIMTLAANRTVRLEAYGITFAGHKTYVSGLQDSISYYLILKTVTTDT
HhalOR84	MSLFTGMRGPLDQPGRGKWYGHLYSANVTFINISLFTNVLTAGLVCFSPGVSVEVRCFTGFPITAGTLAIIRRIDMYLNSDKYKDLTERYLSLYPDSPELKADVQKYGKIIRSIPRIMFLFTAVPMVTVGLLPAVIAITGGPRDLGVPAIYPFDPAEYIFVFCFLCFFQSTAAFHSTLSSLLFENMFNTFACRQLALTKHLSRELYRILSTAKVDVKGVATFESHDGTLMSKEESNQTVLAELKQWVKNHQQSSRLARDLQDVYSISLFVQFVFTGSILCMSAFVVANVVGGIVKVIFCGFYVLGLMVELLITCRLGNLILYESDSLEAMIEGTHVYALPGNIYKEWLRMILIKAKVPTKIVAVSLFPLDVETFKSLLVTSYSFFTLLKTMQHLDLRDS
HhalOR85	MSLQFETTHRTVIQGLRLTGIPLPWSDEASRSIKILNNAYIYFVVIINSYQFAFSLYTVMTIDDFEEICRLGIVLSILVNSVMLTLFYALYEPKLKKFYKDSNTLSYNIMNSELEHYDLFKKNYLKVAKSNNNFTRNVLFFVLCTPLIYCVPTPIIDLCNREYRKHLPFIVRYPYDEHRPGIYEITFFLQMLAILYGDVKKFANDCFFLTVFRIHTVYLKYLSASIRTLGQDFEEIGDAVIKRKLVTWLKLHNHLIRNANDLISLYTPVICIYYANLICIVVFGVFTQIKHESGSIESIGLSGFCIVNLFQLYMQCSTNEEVGVEVDKLAFEIYNIPWYQVSKANKDIIRLIQVMANRPVDITAYRAPSLRLNKEAFLAFISRTVTAVIAFGQMSEIHQ
HhalOR86	MRAPIEESQLLEGMSIFLLKSTGLWNAINTYLTTRRRTIGLNILTAYSIFYALPYVLFQLVSMFVIHVNVEKLTFLFLNSFPCIQVFLKVSVFWYRIEEQCDIFTLLKQDFLSCIPPHKMPKVREIYKQWARYSNVACVMAFASMILCMSSWIIVPGIDGVDDTGAVSKKILGGWYPFPFSRPPWNYIVFYYEMLLMSSHGSLISLFECVMIQPLLCLCAHFTVLGHHISTLKISDVVYSKSKNELHYMNSELRAILLDYDRLLRYTAVMQDILNLLVTAILGTGIVILIIGVLQFKFGTLDPMFVFHFLTFLSYQATEVFLICTSSSALHSASSDICFSIYSSDWYLADREYARTAQMIMVRTYKPSTLTAIKMYPVSVEILVGLFQFTYTAAMVLSK
HhalOR87	RFVDHYRPLLGWLRTCGLSTPWGEKPSFAWRLIIACYNTLLVIMVCYMLFLYIYPIMKNSIPFAELCLLGNGFALLGCSLAITLYLVLFKGKLKVIIENMDSIADIIHQNELGGAEFLQEMYKKNARLMKVLTNNSIYFGFLTPVIFCWSVPTMGWFSGNYRANLPIQIDSPYDYHIPLVYELMVLLLSCCLAVSTTKKAATDCLFMSLFNIQITFLKYLSITKSYIQDDFKSTNKTFSKRKLIIWIRLHQQVNLNIQQLVSIFSPLVILYSVGTIMIVVCGTFVQIMDDNNNLMQSISIGIYVAMTCLNQFLMSRTADELTQEAMKLAFFAYDLPWYEMKRADADMVRMVILRSNRPIQVTAYCAPIFMVNRETFRGFMVTSISAFVTFCQIKDRYG
HhalOR88	RKKKTCRNMFSLLKRYKEEEILNDHCQQFCSEWLSFLGIQPHKTLTLHSAFNSLILIFTLAVWTYTYLEMKQGDSTEALHRICLSLLALGLFSIQFFKHEEIMSVAKQIDDCFSYSNSDAKPFFKKRQKDLFTSGMKIYTDLFTIIVFTTWGSILANLYTQQLFVSDVKPPIPMILPIDSKLLYYFVYFTETAFVVIASIADVLVAHLFMMFTLQLTANFEVLCLNLNSMDRFMKNDLAMLPDSEIIPKININIRHHQEIFKSFNSLKKLFDQIFYILYFSMMSAIAMCRTLLVGDIDIKSLLPLFYLETGYIHIFCHFADMLAEESANVRLAAYSTPWYTFSSNVCTSLRIMVIRALKPPKLYFFIGGSDVSCATFTLILNASVTYFCISFMMENQN
HhalOR89	MAKSYIQWPWEKENITEIWKWPIIFWLNIYGWWAEEASSTFWRKWLSRLRVICFINASACFWSMIFAIIVKFSQGDIMVNLFSVFGAGPGVVGTFKIVQCIRHRKPLKKAMDLLDVMMSEIDEPELEPIVRNGMKRCWIAFFLCLFFGSCISLHWLSRPLIILLFYGERTRIIDTWPVLDDDWFQWSITFLFQGTNVCLCGHTFYIFDNVYFCISESLLCQLRVLKYRLTHLKLDGSVGSDAALEICIKQHTQILKVCDKLKFASEGVIIFQCINTAIMLCTGIFILTLMEHINFNVLLNLGEITLVIIIILYFYCWYSNEITFQCSELATYAYMMDWTDGTFDQKKKLLNLMTMPMHPVIFGGIVEINLNTFINVMKTAFSYYNFLAAADAGGDHAK
HhalOR90	MNGEDEKENVCLYESLFLDGIVLTSSKPHIKLPIPVVIFLGLVMIITVTLHAFMYAETINALDKLIDYGFPAILVSSMLCTLKYRREIHNLSRDVDSWGTFRYLEKETEDVRMNAKLLAQRFSRFYMFTIIMGTGAYCLAPLGKFLFLEPSDPADLLIFPCWTPLPIDTNWGFYTTYFCQSVIIICANIAFSRVFCYKIICFYTIGQQMRLIGSALSTIEQRAERQMREKKNLIVKGKTNIHFIMEQEIKQCARQYQTAYRAVKDTTSIFRPVTSVVYHYGMWVICATGVKIAIEEQLFMKVQILMLLNVILVNQYLYSVSSENLKNEVELLRIVTYSCPWYKMPIHCQKSILLMITSMSHIPSFNTIFGTETNMENFGKILNGSYYYISLLLTILSD
HhalOR91	MARIMLENIKAATDKMVFLVTLSGFYLSPRHPLVQELFLFTNGFLATSLLIYSLNYYWGRIEKTGAVAYYLILCADVCVGSSMGYFMKSSVYSMIKGSIWSHDYESSIITIKRRELETARERDIKMLYKLLVVGIFYMMLDVILMAFVEARINNDLFLLFPCWIPFDMNQISTHISLAIWEIFLVLMVALCMFGAMGIICLFYSHISTEFNILEYAMDKLEERALEMASDYGGFDTRNAEVMKLCYKRCLCMCVDHHAEIIRYFRNATLFLKVSYFAAFGTGVVIFTFAGFFVISDNYAVKIKFTLISLAQLFFLYIISLIAEMIVEKSMTVREKTFDINWYDLPMECQTILVVMRTVSNKPLETKLLSGQTVDLAGFMSLVKVSYSYVNMLLAITH
HhalOR92	STLPMNTERAESLVYLLKIGGLWINFTNHQFGSLIAVFQIFRLIYLVVGWFLMINVIFLKGVKFLLTPSAVFIPLGFNVVGTSVLYFCKIRMMEKLILQCDKNLSSYNEYWEKKLIQTDTEKVKYIANCFSYGLTCFGIVYTIMHVIVNIVRSITGNPERYTVPLPFDGYLDDTEERNFNFYIYTLLSDLWLAFGVPNTVAFQCTIFYVVSCTTTEINIIKEYLRILQIGQNNNATILPDWNLNQIILKHGQILRFNDLQNQSIALPTLVQCRIIFTLSICFVMFLILQLFGKNTFVMLLAAVFILILFALGLVLCSAGEYLEEKSDELFYAVCSLPWYKQSLTLQKSYFLLLLQTSKTLVFDYAFTSSLNLRCYMALVNNAFSYLMIMKSLSPADE
HhalOR93	LIPLKVLLKGTWPAMERFCTSFLEYFEGDKLRLGFAPQRVMFKVMGCFWWKKPSLLQKMYSCGIWIGIQIVSLICIVLYILRTEMKTAEDFTKIINSLVMLIPFLMGILKVGILHINSANFKAMVDFLESFPHDGTIFPAGYKFFMNISWNLITIACWSINGFIRGNLVWYAVLPWDTSTPTGYKLGIASQLVSAVPAGSTHVMIGSVMVAAVERLRPQISKLKVVFSKIGPNHEDNKHIIKEAVDLHSAIKRGVNLINNAMGIIFMVKVLSLVPLICINAFVITKVGDIHYIVINLLPMSLCVCGELFMFFGSGQILATEMENMDHVCYDNEWYLAPVEDRRKLSIIIECSRKQLTINAYGIAYANNGTLLAVVQQGYSYFLFLHTMADIFDKN
HhalOR94	MAKIKLESIEAATKNLKQILTVSTHILSNRFYSLLTFIHATFGFCLLGYSVYYFRNSPEELAQVVYYMGICVAVIVTTIIGYVPSYRSRNVLEDSYHTYDYQSEIMRKKIDEVKESCVKSLKGFFKTIVFLMVWVSFNLTAMTILVGLIKQEPIYLFPCWHPFDINNIIFQILILLWQQYFLSTMIFMAFGGGSMLFIPYTHIKSEISLLKYALKKVEARAHEMARTRKASNVGSVKSKVLSECYKECIKMCVEHHIEILGYFYRGKRLTGIIYTTGFFSGVIACTFGGYNINSENLALKFKNLAILFFILGYLFAMFWIADATTTEFLTIAQTVFEVKWYELPKECQSTLQFMVFMSNQPLFYKLVLGQKVNMEAYMSLVKATYYYLNFLTA
HhalOR95	AMSDQAIEDSEVLDGLNIRYLKFFGLWKVINDFRMTGKRNKIIKIKVFITFAFALPYIFCQSMSYFVINVDLQKAIFLNLHLFPGTQMCCKIVVFWFRIGSQCKLFNLLKKDFLSVPKGMQSKANKIFTKITRRTNLLCMAAFIVNASIVILSIVDPGISVDYILYHTGDMAAVTTGKKKILGGWYPAPMAETPYYEIIFVYEAIAGTWAGILLAVYVCLFYQVLMCLYAQFTILDLKASSLKIKPINSRRKYKINSQINSSMLKELYEILQEHQKLLSYAKELRSVYNPLVTLILGIGIFVLIIAIFQFLFGGKGNLMFIFKSLQFLAYQCIEVSMFCFGSTYIQTASSDLVFAIYSSDWYKADIKFRKAAQMMMMRARKGEALTAVRMYPI
HhalOR96	MQWPWKKKNLSDVWKWPLASLVNLFGYWAEEAKTESNRIWKKRFRALTMLFLPYIMMSMVIQGFVKFAEGDIMQNLFTIFAAGPGMVGLGKFLGIVFYRKQIKSVWDRLSAMISEADNPKLEHIARNSFKRTWILFIVYLSIFTASVTDWLMRPPAAAILYHEKARIVDTWPVFLDTWLQWFLSYLLQFPAIVLLGHSNYTYEILYFCTSEVILCHFKLLNYKLKHLVLRDNKESTEKLISCVKYHQNLLSVCNDFKNSTSKVLIWQFLNTVIMLCTGIFILTVLIKQTPYVAVINLFEVCTFEIMSLYLYCWYSNEITFQCSDVSNAVYMAEWINAKPSDKKTMLITMSKAEQPLLFGGILEIRLETFINILKTSFSFYNFLLAFQVNSTEK
HhalOR97	MANIKLDVIEDASRKIRLLLSLANIILSYKLHSLTTFINSTLACCVLAYSIYHFRNSPEDLAGAAYNLGACASVPVACVSGYLAPVTLRTIVDGSCCSFDYRSSIMRKKLDEVENKRAETLKGFFKTIEYLIYYSTINLLGLTALLGIIQREVVYLFPCWTPFDQNNFFWQITMLLWQVYLIISMTFMAFGGGVLFYISYSHIAAEVKLLKYALKTVEERAHEMAKSLKRSQGEPYARILSFCYKECVRMCAQHHSEIIGYFNNGKDITGIYYSSGFLCGGVACTFSAYFIISDNFALKVRYLGMTLLLLGYLFVLFDIAEETTNELQTVAETAYAIEWYKLPKECHSTLKFMLLRSCEPMFYKLLLGQRVGKEAYMALVKATYYYLNMMTA
HhalOR98	MDPPRFIDHYRGLIAVLQRCGLPEPWLSSSPSRLRTLYQLFVVFSITYIIFSYVYTFIISSMPFQDFCAIGIAGGCNVCGILVFIHHKRYSTRIHELTDTMDAICKQIMTSDLNKKDEFLKEYERNSKIMTALANYSFYLNFTTTCSYFLSLPAIEWYTGNYRANFPLAISNSFNDRIPGVYELIVLAIAGSTSISTVTKSTYDCLFVSLLKIQTTFFKYLYETIDNLKGDVQSQHHFLEWIRLHQEIMKNNEELLQTFSPVVIIYYLLVINIVVCGAFVESKKENDHLIQSISVGSYVVVTILYYFLLSNAADELTNEAQKLTFAGYALPWYQMKKRNSSMIKLILTMSNKSIEITAYKAPVFLLNREMFVGFMVAALSAFLTFCKMGGS
HhalOR99	RQTVSSASYREYYSKKVDMSVPPTRWVRSALEVSGMLAPSEYPKLYSIFSSYSTAATAYCCGASLAYFIIMEGATTEKLQSIQITLTILSGLMKLCNAVLQQNKLNTLLLDFDGLWDEFYEEQLNREIMDKSEKFCRLLFKLYKYFVTVTPITNIVMALIGYLATGADQLILQIYMPFDNKKYYIPTQIVQMMLVISPLLANTTSFLLYLVASEQLTTYMRVLRRKLREEKICNQTIRQHQEVIKLLNNTNELFSWLLYFETTAISVECSCSAYALYKVHIKEGQRENVFIDLINFVFCFFTPYVISYCGSKITTESNLLFREAYNNAWYEHDLKAKKDLRILMLGASKILNLQYGNIVVFGMEHFKSIIQVTFNVFNAIIWLEHADQHH
HhalOR100	MVKILKSLLQELPGVLEITFVISRSPVRRFIQAFVTITNVVMSIANAVSLYFLGLERSLGGTASFAAYGIIICIKHAIYYFRENEIKQLLGFFVEIEKRHKKGWEKEMFEKISKDAWNVVYKYWMIILPYEILYINVLTLLDFVIGYVIPNFPSIRVDVPCEGFIEFFEPRTLKRFIITVPILIWTMASMTVHLGSETLVFISIIYTKIELRIIRKKLEMIKNYLEKKEDDYKIKSEKLLWKVIAQHQRTIEVLNNMKGILGLPVAIHNTAISVTLCVIFYCLMTFDERGSLSIKFHGITLIMCCGSLVLGLCYFGESMEEENNEVICSIYDLPWYSEGKNFRRTVAIMLMQAQKPFVIKYRGLATLNLKTFMQIMNASYSYLMMLKSTV
HhalOR101	ASLVTMLPRFSGDKDLADVLRLQKISGFWFHFNEKYVIFLQMLRFLYYVTFFIFANVIAYRIGMKNALSGSYFLVSWGFYGIPQLITYMLYNKKANNVIERLKLLYGKRTEQWQWDMFHKNSKFVWIIIRFNLIAAFLFIVVYYLPPLLNDLFRLIFNAGGENMFSFPYPLKEIQSESRDFKYYGIFFVSLFWTTTTIFYGVGNITFHPIVCSYCCIEIQILRKTLEDGRKKKLLNDKTFLKKIIANHNEILRIVEDAQVVLGPAEGAQIATGGLLLTAFVFALMEIKGNIILLIAHISCLFVMTLLNFSICFFGEMLQLQGDKLFECLCGLPWDEMTPKTRKNFNLILLQARKPICISFKGLLPVNFESFKFMLNTSYSCLMLLTTMKE
HhalOR102	MVKVIRSQLGDLPTVLEDTFLISSNPRARFRQTLIMITNAIMSLTCAVSIYFLGLERSLEGSANFAVLTVTNAIKHIIYYFRKNEVRELLNVTVKLQEEHKKEWERKMFEDGSNDAWNDVHKFSVILTCYVIFVLALPSILDFVIGIFFPDAISIGVHLPCEGLMDFLGPRSLERFVFTVVVLLWCFEAITIDIGTESLTFIPIMYTKIELRIIINKLLIIKNLMNERDIGYRDESEKLLREVISQHQRILEILNSMSKTLGLPLAIHNSTFAITLCFSFYCIITIDESGSMAAKVQGTSAIIIIGSLLCALCYFGEQLETENQELLKAIYDLPWYNQNLNFRRAVLVMIRQSQKPLVINYRLISNLNLQTFMQIINKTYSYLMMLKSTV
HhalOR103	MVKYIRSLLGDLPTVLDKTFLISIDSDKRFKQIFFTICNAIMTTACVGSMYFLGLEKSLEGAAIFSALSTTISVKQLIYFFRLAQVKKLLYTLKKLQNHHRETWEIEMFEAGSVDTWNAVHTFCLTLLCYLMLFLVLSAVLDFTIGIIFPRAPSLLVQLPGQGFIDFFEPRTLEWLLVTTLFLMWAFEAMVIHIGTESLTFVPIMYVKIELKILRHKLLLFKEELEKLGKNTRHADKLLTDIILHHQRTIEVLNVMKKTLGLPLAVQNTAFSITLCFNFYCIITFNEGGSLAVKFNGVLVVICIGLLLFGLCFFGESLEKENHEVLNCIYDLAWYLQDKNFRRSVLTMLRQAQRPYVINYRRIANLNLTAFMQIINTSYSYLMMLKSTV
HhalOR104	MGWPFNRKEISEIWKWPHIFWLNIFGWWAEHAKTEFLRTWLSRYRFILCVYFTIVTSMMLIAVGVRCVQGGILDNMFTVFGACPGIVGIFKVYCLILFSKPLKNAMEGIDELFLDSKDPNETKMIRNTLKRVWIIFTFYLIMGSCISMHWVVRPVISAIFFGEKTRIVDTWPPFIDTWPQFFFSFCYQLPMILGLGHAFYIFDNIYFCISECILCNLAVLQYRLNRMKLKEKQGRSVDLVHSIEYYSKILRTCTYLRDSSSAVIIFQCIITVTILCSGVFIITMAEHTDVNVLMNLGEESTVVVFVLYFYCWYSNEIRFQCQDVCNAAYMSDWTNGTEENKKSLLVLMTRTAKPVMFGGILEIDLSTFFTVLKATFSYYNFLIACVSNK
HhalOR105	MIGLRVGDLVHLLENTFLYSEKSKTFRKFLNMFMGAYSVGTLVVCLLAAIEGGFKKTMEQTAFYIVIGIITSAQQVYLLCYQDQVKKMVDILKGYQEQHVGKWQTEMFERDSLGVWKVIRYYNMVMGSYNVFYFSLPFVVDLVGGLINPNFPVVRFPLPSQQYVEDYEPRSWGNVLYSLIGITTGILTIEMNIGIEALIYISIIYTKTELNMIKKKLSIIKEVMERKGDNYRMDVVRLMKDVTRHHQSTLEGLDMMDNILGFPIAVQNTIYSICFCIDLYVLTIFDSEVKPGPFIVSIFSLTMMAIILFLFCYIGESLENTNNEVFEALYDVPWYQEGPQIRKHLTMMIQQANKPFVINYHGMSNLNLHNFMQVINTSYSYFMMLKSTM
HhalOR106	MLGIKLASYETDPAKLTVFRNCLIYAGALNDGTLKSKFFIFYRAYGLIVGFLQYAIMATKTTEFMTVVEVFHWMCDFTIMTSMTMSCLYYNPILLRMEARIKAGFFDYGGPLTPEQIKVRATMNRNSQLMSKLYCSLCYCGLVATYIHVFFAKKEYLLPYPMWFPHEIRNMYQYVLTLIHVFIVAETMTICAFSQLSAFVALSSHLIAQYKILIIAIKEIDLIAGTKATPEEKILKMHAKLKTCVKHHVIINKYFDDLHKLFSIPLLTTAIFICLAICTLGFILLSPNVSVPVIGALIILFLPEMFIIVVYCVYGQKVADVCEEFGHTIYYSDWYTKPLSVQRDFLMILIGSRKKRQLTGFGLHEFSMKGLSEIIKATFSYFNMLRAMN
HhalOR107	MAIDVFRKHRYVLRFLGIVLPGELADSWLRILFHIWFRYLSVCLPVLTLCFLFGITQLHDQYSVTACMYSFAGVVSTTSASFKLILLYSHRYDIKELVDFLKDFKADTTVGRITYVLIYFYEFLALSFRVIALIEIFMKAKLKLLMPFWTPFPRDNVMVAICTYFFFQGTAIIKTICNFFIDTLFLLISNQTCHRMFILRNTFRIIGLPEEEKLERLKHKHMLKLPPGVRPTDSNILKLCVEEHILLLKVVDKFTKIINRIFLPQSFNAFSSIVIVLFLVSQAEDMVRESFKVIPWTTVIFLQLFVSCFAGELIKSRCFDFFDSSYANQWYNCDQKIKSSILVIQTYTSRPMIIRGAYVFELSLHTFETAVREVFSTFTVLYQLFNTK
HhalOR108	MLERIKGKKNLTDLLLLLKICGLWFDFKGNIVGVLQKFRYLYFLTVFIFMNISAFQNGIKSAFSGTFFLVSGGFYVSLQVVIYYLFRRKTWDIIEKLRMFNKERNEKWQWKIFDEHSNVVWIVFWLYGVAAITFILVYYTAPLLYDLCLLIFNTDDDGYIFSFPYPLEEIRKNNRDFVHYSMQLMSLFWSLLLVGYGMGSLGLQTIICSYCCIEIRILCKTIEDGGKRKLLNNKQFLKKIIKNHNDILSVIADAQEVIGPAVAAQIALGAILLAAFLFSVMEIKGNISLTVTYIILFNIMASLNFTFCFFGEMLQTQGNELFECLCCLPWNEMTPKVRKDFNVILVLARRPILISYKGLLPVNFESFQFVMNSSYSFLMLLTSTK
HhalOR109	MWDWRQLNWLYYFGWWPSAAKTEVGYKINRVYGIALFIWDFIQIGPEVAALYIALSNGSLKGTVLNLNTVLMGGVCFMKITGILLNEANIKWIIAKLEEMENRGKNMLGLNEYKMIADYRDRRCKLLVIIVFTYLSGLVQWIVRPIYDICNGRTSLIIEAVIPWDKDTIYGWTIVFILQFVHLTTAIMALIIIYVLYLSIMEMILCQIDVLHYSLKKLDFSPPGADYHSSITLRYCVKQHQDILSLCYRFHKVVNVQLFVFMMFSTVVLCLSVFELSSIKDTTLFKVSNLLELTLNTVFLIFMYCLYCHNTVDKLTEGTLRAAYKNNWYMGREEDKKSLDILCTMSIKPFEFGFIIPVNLDTFITVLKSAFSYYNFLKAIADEE
HhalOR110	GMDVFRRHKYMFRCVGVYFDGELGRSGRVVVELQRWITTFLLVYMHSFGFILGVLYRHSEFPLIPTLVMCCGMVSGPSTLLKHMMLHRRRGQVKELMDQLNGYKVEGGVSTFTKYLIYSYEGMALFFNASSILKNALENPDLTVPYPAWEAYEINTQGRRTLHFFTFYGAIAICWLVTASVDTVVLHLTNQLCDKLAILNNTLQLIGVDQEQRESVLTKKKVLPLQDYKDETILKTSLEEHCHLMRLTKSLSQFLNEVFIYQGVNSMAVLLVCLYIFSNSSDLVNDTVAFSGALVVVFLQVLTSCWSGELIKMRCEQIHFSLYNNQWYNADHNLKRSLFIMATYTAKPITLRGAYVFELSLQTYETFIRQAFSFFTVMYQFLD
HhalOR111	MWDWRQLRWLSYFGWWPAAAKTKRAYRLLRIYGIVLFLYDFLQLGPELIALYLVICKGSMNEVVLTLNNNLLGLGSAWNIGCVLYNEKNIMWITSKLEEMELRVKKMIGNEEYDKYAAYKYKLCRNYVLTIFIFLAGLIQLTIYSLYWTYHGHVSYIVETWVPWNTDNLQSLIILYTLQVVHSYTGLTAYATVYHLYMSIYEMILLEIKAFHIALSKLDFSPPGVGSHPPVSLDLCVKFHQDLLLLCRKFNETINVTLFLFIMFSSLTLCLSVFELSLIYDRGKLTMLIELIMLTMSMTYFYCVCSQDVVEQMTVGTLRAAYDNNWYVGCAKDQRALHLLCTMAKKEFQFGFIIPANLATFITVIKSAFSYYNFLTAMDLQE
HhalOR112	MERFCTRVLEYFEGDKLRLGFAPQRLMFKVMGCFWWKKPTLLQRIYGSFFWIGLQLLTLISVISFILNTNIKTAEDFTKIINSLVMLIPFLMGILKVGILHINSANFKAMVDFLESFPHDGTIFPAGYKFFMNISWNLITIACWSINGFIRGNLVWYAVLPWDTSTPTGYKLGIASQLVSAVPAGSTHVMIGSVMVAAVERLRPQISKLKVVFSKIGPNHEDNKHIIKEAVDLHSAIQRGVYLINNAIAIIFMVKVLSLVPLICINAFVITKVADIHYIVTNLLPMSLCVCGELYMFFGSGQILESEIEDMDHVCYDNEWYLAPVEDRRKLSIIIECSRKQLTINAYGIAYANNETLLAVVQQGYSYFLFLHTMADIFDKN
HhalOR113	MSNIWPQLSKLNWFGHWPTDDGLKGGLQRTASYTILFWTLCLFGAELFSSQQTFLSGDLIGMLGNLNEFFSGLQCYLATLVFVVYRQPLEEAMRLLEELTQEVTTELEEVAMEEFSRRRKNGRRAYYVFFGTFVMVCYWAVRPLLSMAIYGESSLIVHSWVPFAKDSLLGFFGNFMFQIVPCLSFCLGFCLFASIFVFLSEMFLGHFAMLGKKLNSMDYGKEPLESKLANCIDHHTRLLKICSMFQDITSVPLLTQCILYVLGLCISMFELSDVQGASSGRLISVVAEAQQVVLFLATYCWYGNEITIQCLELMRPGYMTNWYQGTRIEKKMLLNIMTRTTRPIYLGALIKMDMITFINVLKAAFSYYNFLAVVAAVNAEE
HhalOR114	MKFNAFRKHTICLTILGVRPPGGVKWKWLGVLLDIYLIVQLFCIATWGYLFFQGAFLYLPDAFMDRIVGVSAAVSVLGSLAKLITFRRKGHVLKELFDQLGGFPVNTARGRLVAKVVTIYEVSVAAIVVTHNMHIAIDPQIHRSSPYWTASMTSGTKQDIIRDYLFNLDSAIVALSANVIGDTLFLILTNQICHRLLLLAETVASIGKGIRPLEGLSVPEDATDEEVIRRCVDEHNLLLKMTKQVEELYDRIFLVQLVYSCSDACLTLFTISQYEDFVEAMNQLLPQFISLFLEIFLFCWGGQMINNHFERLHLASYDSEWYSLDEKNRSSILVIQTFTGRPVNVTSTSIFHMNFHTYETICKEVFSYYTIMRQLFSQK
HhalOR115	MDTFRNEKIALRLLGITFPKDLSSPVLKTMVTLYFWLQIAAEGYWAYLYFRGAYLYLHEHFLIRMVGLSAAISVSGTIAKLIAFKLNSGLLQELFEQLGGFVANTDRGKLVKKTTILYESAVAAILVTHNYGYFINSTPTRSTPYYSRYQTGPYEEVALDYWYTLYCVFVTLTGNVMGDTVFLLIINQICHRLLLLSNTVSVMGKQEKNSTMEKMDMRGGESDQEIIQMCVREHNTLLKFKNQLEELYNYVIVVQLAYSFSTICLTLFVISQEANVMEAMSELLPQTISLFLEIFLYCWAGQMINNHFEELRLAVYNSGWYDSCREEDRSSVLIMQTFTTVPVEVTAVSVFHLNFQLYETICREAFTYYTIMSQLLGQ
HhalOR116	KDPMRPKKEIKDPILFLERLLEWMGVVSIAEDQKPWYYTPMVVLQHISHVNGLLATSLYVLGDNPFFSKMESAQYFISLLHMVAKYYNLHYNNPPYRRLIANAKYLWQEAKKRPRMNNLLAELSQDVDKKMKFFFFIFAMVSPASCLVTLIANLMQEPEERGKPFVVWDPVPESWYWTSCFIEGWCMMVVLSMLGTTLVACYGNCLQAATQMRVLQQMLEDSPLDLRACVQLHQNILRYIEDINDYFSGQMFLEIVFSSLQTAIRGYVSLKFLNAGNPKVISSFFFLSLCLLGPFIVCLSGHVITDSKEKLFISAYNNAWYSASPREKSSLVILLCQASKIKRLNYKNLLDFNMERYSVVVQGTYSYITLLQGADL
HhalOR117	MERDEPYAVFYKVLEYNGIKENEHSKHRKWFTVLEGILLISLCFDNTFPLIYVIEDHPFNDKAESLQCVTSMLHISAKVIYYRFRGREKLKRLLDDSVKIWKEMRNMKKYEDYLDETWLAINKRVNVITGMFSLCTPIYCLIAFAINLNLDPEDREPLFKIWDPLKYFFKIEDYFFIRMFYEFMMFSYALSTIGTLYLIYLIPSFMAASQIRFLIKMLSSKDLNVTACIEFHQKVLKYVKDINSLFTVHMFFEIILATLVITFRSYQLIMIITNYDHGAVVVSYYLILCFMVPLLVCYSGQMITDASEDLFHWTYQNEWYRLNTKDRKSLCIMMTAASIPLSLCYRNTVTFDMNRYMAVVQATYSYITILINNN
HhalOR118	MVMIPPFHYTRKQMVMLGILELPNGPKFLRNIITVVIIALSFNSNLSSFLYFLLEDKPFFEKTESILNCIGILHVFSKALVLPFKRNVLLSVMSDLDEMSVDSNRFQEFRKGYNLNMMLSRKIPQTVLLSMCTLMMCGTIVSIVRYTTQGTVTPPVQLYIPFKDNISLTILYNYFLVLPTTFVFSVMISFLISLSLNISIQISYLIMKLENLGMDLSSKEIDSCIILHQKIMRVMTKVNSLMSGLLFFEYLLTSMQCCLSGYQLLADKKNDGIAGFFYHCTFFAISVTFSSVNCYCGDIIKLKSENIFEAAYCNNWYSLSNVERKKLLVLQLASSKPFTLSYRHLITFDLALYGIILKGAYSLVTVLQTMETV
HhalOR119	RYLKFFGLWQVINDYRTTGKKNNIIKTTVLISLLLAVPYVVFQFLSYFYIEVDIQKATFLNLNSLGAIQLCCRVFVFWIRIDSQSRLVNLMKKNFLVIPIQKQEAVDELYNEISKTTNFWCLTYIIVNISVVILYIADPGVSVDYILYHTGNMDAVTTGRKKILGGWYPFPMNESPYYELIFLYESVCVLWAGILIAVYFCLFFQVLCCLYAQFVVLGYDAQTFNFDLENGEMLHHYHLRLSDTFRRILQDHQNLLRYSDELRSVYNPLVTLTLGFGILVFIIGALQFLLGETMSPAFMFKMSKVFVFQGVEVFLYCFGSSFIEAATELRLAVRHLQQSVVQGEQRDREGSADDDGRSEKWCSADSYKDVSG
HhalOR120	AQDEEAAGLTLQKALFKLSGVFLWDPPNKMNAIYPILPMFFINIVAILNFLQVFRYSIHTLHDFTEMILTLIVALVFASSGLKLILLHWSKNYIKELVDFLESLPRLESYKKVKHMEGVCMLYMYILIFTAIPKYCLGIMKGELPFESAWPFDTKTTVGWWIAYSTDILSANFCWFAQSSLDTLLVMSVTLMAGHLARLRKILSSIGKDTVMDERIIKTAIKLHVDLLHGADLVNSSYGILIMFQSLYAIVHAVIIIFYLVKVPDILNAVALSFMLMGAYSQLFLYCSSGQLLTTEFEKVHGAVFDNRWYRSKPSIRKSMVMMGIRSQKLVIVKNYRIFTALHTTFLQSCQESFSYFIVFRTLAANIKLS
HhalOR121	LIQEPILKMAIDYMKLTRKLYVLAGILTEHNTPTSWKVKLISNLAVCSVFLFNLYAFCNGCVVSGLTKDCISHTIVFIVVHIQSYIKFGILVTMRGTRMKYILDFVEGYVFVNDSYAKHIYLTSFYIIALTVLAYAIHPLISHSLPFYYETPWGSESFSAFASSYFVMFFDLYLIQFVSTINDFTYLMCADAICYRLNRVKSLLESIEGEEDEGKLIRAIKEHQDILRTLNMLADTISPNFFMQVFATLSIVIFSAFTAVTSNESQHFSACLSTLATLLTYCWLGQMVTNATEALHFAAYNNKWYNCNRRMKMNLQILSSFTREPFEIRGCSIVRMNLQTFKEVVTDSYSYLMILITMDDTS
HhalOR122	YPPLQDSNIIDGLRVGYLKFFGFWKIINDYRTTGKKNTFMIFKFYATFIVSTPYILPQLFSYFAINMDIEKATIINLHCLPAIMMCCRVLVFWVRMDSQCKLYNLIQKDFLHIPEYKMAKASIIYKKITRNANSLCILSFIIDVTLVLTLVSIPGVPVDYILYHKGSMFDVKTGRKKILSGWYPLPMAESPYYEIIFAYELVCVLTVGLFQPLYISLFYQILMALYAQFVVLGYHVSTLNISRNSDTRNKIASEKTESGINEDLYKIIQDHQRLLSYADELRSVYNPLVTMNLGLAICFLIVSVFQYQSGETGDMAAVLKALLFLGALLVELFMFCFGSSSLQTAIELESSACSL
HhalOR123	QIFRLVIFVKSVSLWILSAYIVGAADFLKKIYAGIVLCTPYMVIQTIFIFCNGHHLQSFVTTMANTIAKRNEPWQKEILNNLLNPLWKIIRISTFYSLLLLTVAFYGPILFDTLSTVFTSAEPLNLNVTIDGLLPSVKKGNFFYYFLQWYNAFLEGLGLAHFIGLVSILPLLVNYIRVEIKILCRKIDEYSRRGVAEQEALLREIIEDHINIMRLTELTNKFLAAPLILQNVAAAAAITLFTYAMTNSISQGYDNVTALLFNLNSPIAMTMVVFLSCYSGEMLHLESLNIYDGFCQIQWYNMPKKRQKDILIILVQVQRPLRIQFRGNAVDLRAFKQVINATYSCFMLLKSFA
HhalOR124	MKVIDVLSHHRVYRWFLNYLAVACIFIDREWIWKKYYVFMTIFSVFGSGVMLYSLIVFIRDIDSVAVIMHHGTINIDIIISTQVCFIHRHTIRELVKGMSKSFDYESPIVSQFLDDLQEKRVKEMEKVFKYIMFTAVFMQINLIIFSIVEKYMKNLDYMLLFPCWFPFDLSYLPYHILAYFWQHINVEAIGLLICAGMAFSYIVYSHLTSQIILLKFAIEKLKVRAYELACSTLGDNTKEIFEDRLRKCYIKGTIQCVKHYSMIIDYYTQAKNLFKILYLIIFLTGLIILTSTGFALVSENTSLKIKFIGVNAVQMVYLYIFCWLAEEISDLGESIRLSIYGIDWFEMPK
HhalOR125	ERSRLGLGEYLSNQLGMEGEAKPNLVDRDVVYNFEQERELLMMISCYKVSKSSKLNHFLSLSYVSIVWLFVLFELCMGLYSVVLTIDSPKTQLLETLHTVVLTFYVIAHMTNRLQSGFDAALEIINKGFYTYDENMGETHYEIRKEYVRRIRLVNKWFRIIIIYSGISFLMFNTAKKYLENVYKTEPSKIPINPYFPIPYFMPFDTSTVVTFTSAYLLNVALEFFICSVTICIDEIYVSLIEQLKAQFVILNLSISNIVERALRRYQDGKAGSVPNVEELYQQKEFQDCVLQCLKENIRHHHALLRFTALIRNYVQRTFFPCRDNGRSGPCSGGVSHY
HhalOR126	ALQMCCRMLLFWFHMDRVCRLYDMIRKDFINIPEYMRDSVRELYIKTNRTFNVTCLVIFIWNAGIEFIFIVFPKVSVDYVQHHTGSMAAVKTGRKKILSGWFPCPMDEYPYYEIIYVYEAFCLLWAATLLNVYFCMFYQVLMCLYAQFTVLGARLSNLKLDFPDFGLSKRHKNIIQNCNYNLYQELYESLRDHQKLLRYTDDLRKFYNPLVTVTLGIGILLLFMGAVQILLGKTSDPSFLFQLFQIFSFQFIEVSLFCFGSSRIESASTDLQFAIYCSDWYKADVRFRRAAQMLMIRTRKSSTLTAIVMYPVNLETLGAIVQFTYSAAALMSGMVN
HhalOR127	LWKVINDYRTSGKKNKIIKFELAITSLLVVPYICFQYLSYFHIDVDIQKATFLNLHSITGVQMFCKMLVFWFRIDSQSKLYNLVRKDFLDIPLHKRTVAKEIYKNITKKSNVFCNAAFLVNASIVTIAIVCPGLPVDYILYHTGNMDAVTTGRKKVLGGWYPFPMAQSPYFEAIFVYEAVILVIGGIFLGSYVCLFFQVLMCLYAQFAVLGYHLSTLKISPERGDTRVTENRRDDSKMYKELYGIVKEHRKLLSYANELRSVYNPLVTMILGMGLLVLIISVFQFLFGSTGNPMFIFRSLQFVAYQGIEACMFCFGSSFVETAAELGPAVRHLQQ
HhalOR128	DYLQGGEMAKMKLEIIEAGTKNLKLILTVSTHLLSNIHYSLFTFVHATFEFSLLGYSVYYFRNSPEEVAQVLFYMGLSVAVMVTSITGYVPTYRTRELVEDSYCTYDYKSLIMRIKLDEVKGQCAESLKGFFKTILFLIVWVISNLTGMTILVGLIKQEPIYIFPCWHPFDMKNIVFQILILLWQQYVMFTMIFMAFGGGSILFIPYTYIKSEVALLKYALEEIDSRAYEMARNSKFYNDDLDKSRVLSSCYMKCVKMCVEHHLEILRYFSNGKRMVGLSYSTAFCAGIIACTFGGYNINSENLELKFKNLAILFFYTRLSLCNVLDSRRNYK
HhalOR129	MDPPRFTDYYRWMLQSFIYWGMPTPWLPKLTKSAWWLLVVYDFLTLLLICFALCIFVFTIACGNLGFQDVTVLLPGFVFYTSALYLSLYQYLIKGHLEKIAADVDAIAREIIESKLGLEKELLQVYSDNSKNIIYYCRLLPCLYVSSSTIFFCSVPIVDWFEGNYRTNFAISIVTPFDYRQPGIYEFVVLLMTTALFISTCKQLNNALFFLAFFNTLRSYLKYLYLSMDELQNNIIEEDYTLTRQSIRTWIKIHQEINRCLQVLLQLFSPIIIVNCMYILVYLVGALFLQTQEKKKQHLPDIFSIHWCYGNGYSSVYDLQYS
HhalOR130	MKVIAPTTIPVKSWRKKREEVVEKKAKTFKRNFDLIFYLTCYTFINLTLYGLIEGILRGEDVYLLFPCWLPFNLDNTFLYIVVILWQAILTANMQFMAFGGLGILYIPYEHIKAEIAILKFALQKMQERSKEMAEERGDFRKDKDKKVDQLLLYSSHLSCMRSCAEHHVEIMQYYNAVTGILTIIYSIAFGTGILCCTFSGYLIVSDNNDLKVKFTGLCCVILLHLFVICWVAEATTNELLSLGNTIYSLEWYHLPKECQSTLRLMLMKASQPLYYYLIFGQRVDIEAYMSLVKASYYYINMMTAK
HhalOR131	MLISILAKSSLFLKMQATVKSGFYDYEGNMSEEQIIARAVANRDIQVSTSIFSACCMAALLFSYFKAPLFMRTHSLPFPIWLPYKIKSFWSYLPSMIWMWFIAEAMVTCANSNWVALVTLAGHLIGQFKILIMAIKAIDSLAKDKDAEHKVLERIKCCVQHHLLLINFFFDLQSYFNISLLVAAFSTGLILCTLGYLVISPETSLAVAGSLMFVLIPEMCIAGYYCVLGQKIADVTEEIGIAIYNLEWYTMPLPVQRDLLMMLVGSKKTLQLTGFGLHEFSIKGLSEILQASFTYFNMLMALSGGK
HhalOR132	GTTMTYQDVIEDSDIIDGLSVRYLKLFGLWKVINDYRTTGKRNRIIKITVLVSFILIVPYITFQCISYFKIKVDIQKATFLNLNSMFALQLCCRLLVFWYRMGSQCRLVNLLKKDFLNIPTQNRKAVDEMYKKISKTSNICCTTYMISNIIIVVLLIGKPDTSVDYILYHTGNMDAITTGRKKILGGWYPFPMNESPYYELIFLYESVCVLWAGILIAVYFCLFFQVLCCLYAQFVVLGYDAQTFNFDLENGEMLHHYHLRLSDTFRRILQDHQNLLRYSDELRSVYNPLVTLTLG
HhalOR133	GTITLSVYIYLVLNQKKLKKFLVQLKVLQRMRREEWEDEMFHKETDKFWRLYFLYSDFIAFYCIVYMTVSFLMDFIVGYFNPDAPSSRLPSAGQGFIDSTEPRSLNNFLASSISILYIAAIYPPFIATEGFLVFSMIYTRTEQKLLNKKVSILKYALENGELDVNKKIKEIINQHQIFLKVLKSLKETIGFPITIKYATTSVILCLNLFTVSTALTTSEYSGTIIAVTAIGSLGTLLLILCTAGESLEAENSELQFNLYDLPWDQFKPQDRKTLVMVLRQVGKPCCINYQGI
HhalOR134	QDTIRDSDVIDGLNIRFLKLFGMWNAINEYRSTGKRPPVVKIHVFGTLIITIPYIVCQLQSFFNIDFDLQKLTYLYLHPLPAASLCCRILIFWFRMESISRLYNLMRNDFFNIPQHAKAGVKKIFKKISRLSNICCIFLLLWNAGIEILYLIFPGTSVDYIQHHTGSMAKVKTGRKKIFGGWYPVPMSEYPYYEIIFAYEFVCLFWAATLLAFYFCLFFQVLMCLYAQFLVLGFRLSSLKVDNDDSDSRKNNTYNKNNNTRIYEEL
HhalOR135	SSEYIANHVGNMKDVTTGPKKILGGWYPVPFTRSPWEEVVYVYEFLLFFWVGYTVMIYELVITMEVMTLHAQVSVLNYHVSTLSKKEIVQYSGKKGLTQREVEDLFYKELLAIIRDQEMLFGYGERLKNCFNGYITMLLATGGLLLIASIFQFLFGAKDAIVSINYMFYLLYEVAEFIFLCFATTMLETSSTNIAFSIYNSEWFTSDKRSRDTIQMIMIRSRKPMSLIAVKMYPVNVETLMSVFQFAYSASALISRMVE
AlucOR109	MKRELKAEAVRHFTRLVVKKPMDLLPRLHRGRGVFNLEETSSGRSDSESKLPRAQHNVFYQQFRPMILVLTAFGRLAIQRGSDGEYRWKWFSWLSLFCLLNYAVQTYFAVAICRQRIKAVFESSNYDEFIFAIHILAYIQMHFHVPVSYWVQGPLYAQYLNQWSQFQNEWFLVTGEELKFRHKKAALTFVLVMLPFLALVLVMEKYSTLHDPFEYLLPHFFTIGSTVCVLGTWYIACLEIAFISKDLTKHLIKKLHSNPDPTFLQKWRALWMNLGSLVTNLGTNHFAIMSSIFLTFSVTFLLGLYNALSKIIIGDFSLKTIGYLTASGMSIIIIYIVCDSGHQATSRVESYTSQCILRAHLPAARDDVKYEVDLILRVVQTDPPQIQLAGFVTLNRPLF…
AlucOR107	MEESWLVRYYGGGLGQAEYERVRDFAVSEFTPLVLFLGIFPPTDKMALMSIVVSLSIAVYAFYIVLFTITCSFATDDFVLWSELIHHTSLMYLGIFIRSVLILEAKEMIKLARDYLDGIYHYEEGYVDPIFQQLQDKSRKLQRKLFMLPLFIVLVTGIALGLKPLLDDVNEVEPHPKLLENGITYRSLIPIFYPFNNENTYQVLLMNGALLYFAFLVVVTVIAADLLFIRVSCRISLEIAILVESLNLIDKRAKRLYARKYGLNKKNESWPLYQDCIEECIKENVKHHQKIIIFYEQFSAVAAPAIGGGFFTCTIVLGLGMIVVNMDNVNISDIIAFVGTVFAEMMNAFMISWMSEKIGEQNYELYNAVYNLKWFKWRQSNKKLVITFLDGTRQPLFLN…
AlucOR106	MKEKDHSKRKDMLSVDYRKYMYCKLIWIDDGLADRGLTTPLLFIMIWMVFMVFFGLVSFVMSTQNKVRLDNLRSFLLESMVTMSIFNEYMSRKSLARLHHFMDESMKTPRTGLPKEEEILKDAKSLAKKHLTAYTVIFTFNLAAMILSQPVAEWIQGNSWKKLPYPWVIPPSHNEFLFWIVFMFQSIGLYFSHCLGVVIMSFSSITIQITALFEVLLLSLSHIEDRAKVMSEREGADYTTCITECLKEDIIHHQRLARELISATPHLRRTFFALSVTISMIMACEAYPLIMGNFTLGELIKGLLFLVVQFMCWGQMCTRMETMADQNTAVFNALYGTPWYDSGVKYKKLMLTSFTFSREPMYIISPLFIEMKATMSTFYSFVVSSFNILNLIRKMN
AlucOR105	MGFFTSVDMTDVQRLRVVEDSKRRSGLSDLIGRCGGYRGPLYNEHYSKNILFRIYVHLTDLAVWINYITMIAAAMKSQSVLEFAMVGFPISAESLSLFLSYYSGYKNAEMTEVLLGFDDCFDDDPYPQHLEMEIRKSADYYHHFSRSLLWLQVFTMQIYCFLFPVTNELMHDFFRPRALPLPSLYPCDWKESRSCFIMIIFIHFLGATYVNWKIIGFGEVFFSMVSRQVALFRHLNHNLNQILTSVHVSTDGTVIYRVDKEIDHIYIKSALRKWIKHHQNVMTQYDRLQTLYSWPLFVHFGLVSGALCCSAYATSDETLDFDANLLCGGFLVGQMLELFYLCRMGDWITIETNELTLALTGSYTFVLDRIESQMLRIILSRVHRPSVMRAVGLYPLNTS…
AlucOR104	MFQERYKHEPDENFETELELCYYECIVQNIKHHHNLLREFNDMVTVADYAVAVPFFAGALFLGLCGLNLISEGDPRYSPKCVSLCLGATEGLNMLLICNYGEAFQQESEKLFGTIFGMKWHKRSMKCKRALMLLQLGSYKPLKITVGKMIALDMKTFSNLVNSAYSIFNLSAVSKGND
AlucOR103	MGTSTLGARPTMRPNRNLFSLSLLLMKIQGLETPSHATLKLVSFVWKYWMLYTALHFVMVCLLGVTIGDNPYYLKLETCSGMIAGMSMVYRHFVLAFNRKEVHRLMDRINALVDDVVSVYGEETIAPWEKMCCGIMILSTCVVSFTTIPAYAYSYLKFYTDGEVTAPYEVYMPFERDAAHIHHVVIFQMLSFLDQAITLIVSNTFIGTIVVIVSGVTEKIAKRYKEINRNNFHTLKVTTNWHSEIIKIVEDTNALLGSAIMVDCLLSVVHISVSGYLLVKVGFESGTNLHKYIFLNLLCVTIPSYFCLCGHIISVGRDKLHEAVYQNEWYELTPSDRKTLILPTWMADKGLSLHFKKAVEFNLPTYLAIIKQSYSLIAMLKLMDG
AlucOR101	MWDMRQLRMMNLWGWWPKMIKDPKKRKIMRVYGYCSFGLDSITMIAEIISLYLAVVNGSFRGAIINIVTTTLGTMAAQKIYTMLVHHEFISHICDTLEDLDNRAIELMGEECQVTMKDRERRCLLTFVFVGSCMFTVCHYNVRPIIVYFLYGERTIAMDMWTPWDEQTSETGWIVVLIYEWIHIFAAMYGMTVFDSLFLSIFEMILAEFDVLKIALRKINFAAEKKEVTLEFCIKFHQDLLLLVARINEFLIPIQTIQCVMFTFTICFSGFELLSLSDGSLNKMANLVEVVGAATYITFGYCYQCHCITEECEEVVRAACDNNWYEGSVEDQKKLLIILERAKNPISFGNIIKFDLGCFIAIFKTAFSYYQVLQAFDI
AlucOR100	MESVAMGEGEKRKTNRSEGCVDYRKFVFCRLMRTDDGLVKRGITGSLLIIMVTTVAMETCSFVSIFMSKQLQSCLDCVRSFLLGNLVTMVLFNEFANRKRLARLHDFLNSSMSSPRTDLPEAQEILNKAREEASSSLRMYIIIFSGNIAPMILAQPLAEWISGHSWKKLPIPWAFPPSDSDVKFGLVFTFQCIGVCIANCLGMVFMSFSSITIQMTAMFDVLLLSLRRIENRATIRTQREEMDYKTSLLYCLREDVIFYQQLVREMTSATPHLRNTFLAFSATVPMIMACEAYPIISGNFTIGDLIRSFVFLAIQFTCWAQTCTKLETMTDQHEAVFREIYQTPWSDSGPVYKRLVYTTLLFSTQPKHIKARLSNEISATTSTFYSFVVSSFNWLSIIR…
AlucOR99	METKEDEYMKPLVQLLKFGGFWFDFSGHKHAMALKWCNIARNVIAFSVWAYQMAYFMGGVSYLLTEAGVFVPICFDEGAVAVIVLCNQSTIRETIRIYRKRFEVFGSTPWAKNIIDSEMNKFNRIFQLPKLMLSVFFLFYSVVPLVYDAVLAYSGKSPYVVPLPLNFLLETPMQRTPAFYMTIYLSYLYFMIIVPRFIAFEALMMYIVAFVVIDVKILVQKMKNLSEKDDGSLFLQEEWNLKDVIDHHSTVVRVVEEHFWLVGLAMMVQNLTFSISSCLVIYLTKTSFNNGDIVLALFCGNFVVLLMILNLMFNGAGVLIENQGEMVLTAIYDTEWYKQPPKVRKEINAMLRQGLHVLKISYWSNTVNFETAMVVLNRAYSFFTLINTGE
AlucOR97	MVKLFDELAEQEDEELMGVYEKLYGPALQLSLLFPSWKRENLYKTFGIILVYTVTLLVHFYVLSVSVVMLRDDFEAACLAFHYWLIFVMVFLSLALINMDRRTFSFAHRCLARDMGNYAAGRIYSESKPLALEARKKKELFRFLVLPGMVVILAAALLVVPYLKKINNPPHYNAYGVNMNLPLATHYPFPTDHGILHGVVVLGQLSAAFSLAVIVVSLELLLFRVSQAIIFEFKILQYALETLFERSERLFFQLHPDYYGKLSHMNSNYQKCITRCIQDCVKHHYKIQELLQAYEYVLKWPAALGYGIGTGVIGLGLVTLLMAKEKGNLENVVIFSLLIVAEVLNMYIVSVFGEDITTESAAVRDELYFIEWYKLNIPNRRMMLNFQVGITNPVIVKAG…
AlucOR96	MAKLFGFHIINADSRKCLSYRMSFPMTTLLMAFNLCMLSGNAIGCLIAALLDSNFDRRLMNVKGMMLLIMIILLAINESFISRNRVNRILDYINRIKSITRYGFKEEEDIMNKAIDDCYKSTKYSTTFFFTNSMLMVTLPPTMAIITGESWKQLPYPWVITQTNDWLYYSSLVLQVVATALCHGVGAAGFSLLTTMKPLAAAFDKVILGINRIEERAARKMSEEGITYQESMLSCLKESIAHHQEIVDELLMEKPHLEIMFFAQVTFISIVMACEAYPIIMGIVDVSGLIRGVLFLFIQVMCCGFLNLEFDTIANKNVEVSEALYGTPWYALGVEYRHVVLNSMTFSQNPIWICGMGFFGLRASRATFYSAMVSACNMLNMFRKFA
AlucOR94	MSNQDDVGDDVSVRRIPRSAQKRPQITVKNEKEFDGGCTDYRKYIFCRLMYIDDGLVSRGLTLPLIIIMVHTVTMEVCSFLSIFGSSQIKDGLDCVRSFLLGNLVTMVLFNEFANRRRLGRLHVFLDKSMRTLRTGLPEEEEILKRARDQASSNLKMYIIIFSNNIAPMVFAQPLGEWFAGRSWKRLPIPWSFPPSDTDLAFLLIFLFQFIGVIMANFLAMVFMSFSSITIQITALFDVLLLSLRHIETRAALRSKLEGTDYRQSLYNSLREDITFYEQLVREVGSATPHLRNTFLAFSATVPMIMACEAYPIMLGNFAIADLVKSSVFLAIQFLCWAQTCMRLETMTDQHAAVFQALYNTPWYEADLKYRKLIFMSLTYAAPSKYIKARLSNEITATT…
AlucOR93	MTLKSYIKKTLKWEEPLGLTTMIAVISGAWNTMAPPQSIQRFIYWQSWFQTSTYVLFMMSAGINIFVSTDFFGECLESLHFLVTAFHVFIKYMTMRFRERDFLELFDDIKRVWSGYRIHNEKFLSSTLASVNRTTVIISVCIINVMFVNIGAAVLKNILEPDKIHFPIQIWIPSFCRDSFMYGTIAQVVLFSWPLFIVAQSTTFLNSISVHVEALGLSLAKDIGRQKVWKGDSARRFYKKHQEVISIVSRVNALMAGNWGFEMLCSSLQLTLPAYRTLRALKRNEIEVFNHAVILSLNFMVIYIIFGSGNRILSMGEEINDRLYESDWYKLPVKEKKNVLFMLFRATKPVEYRYKMIHFDLPGFMKVVNTVFSYMALLRFLDGGNDGGNGGLL
AlucOR90	MVASTSKNRKIKNEQAVRGFTRSEEKQIEDHLFSIFNILPIIGGIFGYHQSPKWSALTYTLNIGMYTSVSLTALNLLYCSYLLRDNLSQVTMAFHCFLISCVVMTASISLTLQRNKLIEFLLKLQFRGPLAEYHDSDYFQALEGKTRQRIFRMLVIFLSCYGACGLIAVIFPFVDLYLKNADQVTNVPEIYWKGLPFAVWWPYDVHNSTSAWILCFLSQGIWALFAPVIVTTAVVLCFYGAELILNHFKLLIFSVKNLDQRTKAMYERKYKENSRTQLENVYEDCFYECIVQNVKHHHIILKIVEEFLALANYAIAVPFFGGALLLGLAGMNLLSTDDLRIGPKIFCASVGATEATNMFLLCVYGEKFQHEGEELFNSIICTRWYKRSMKCRKALMIMQ…
AlucOR89	MAFGLEQMDCLTKEEIGIKAHFMRLMNLSGTFSRRKQTRLRSAIIWSVIYVPIILTLVATCIHFRKNFDLSSYALHHAALITIGFIVNVMTVCMYWKEFHDIMDGSTMSYNYDSGLVKNFAQQTIHERFKLSGLLVKLVSYGSVGVIIEVQIFFAIEAFYLQTYKTIFPMYVPMDLDDPFVFTSVVIWQELVVIYTTYLPLMLAVLYYNAWSHLDIEIKILTFAVANIQRIVEEESQNFRHEGIHRETLEAALYETYSYHFAKHHAHITSYFELFSKCVKLITLLLFTMGPVCLVTVGLSLLSDNIGIRLKLFWFLVIQLIMTYAICWIGQYIADVSTGISEVLVTAPWWLMPKSCRSTFLLIMTRCRKPLQMTTDYGVPANMESFMDLLKGVYQIISV…
AlucOR88	MSFLMKFIDSLAENEDDALWDQLHKFYGPILEIAFIFPSWRRSKLPISLAVMSFYAFIFPVHIWLLTVGIQCVRDDFNLASLEFHYWLIFMFSLVALLMMNGNRNFMISFHRTLTSDVGKYRAGRIYDEKRPLEWEHNKKKQLLKFLSLPTLVLVLAGFSLLVPYLQKMDGTVEYNERGANMKLPIPAWYPFPTHEGILSLLAVLGQFMAAGGLATTVATLDIVVFRLTQSLLFEYQVLRYALETLMPRAKRLYTLKYPAEDMRKLRTNDEAFQRCIGKCLEDCVIHHQDIIKLIKDYKTLVKWPGFMAYGFGTGVIGLSLVNMLSAKEQGRYEDIVLFFLLALAEVLNMFMLSTFGESITTESKELREQLYFIDWHLLNTSNRKLVLNFQIGVTHPVI…
AlucOR87	MWKCWKKSSAPPPSLKDEAWKWPHESMMNWFGWWAEELERPLVVKLLQVMRAILIPSHLIFYGSLLYQTSNEFRQGTIISTVKSAFVSGPSTVACFKLYVIVRHRKSLKEITNSMDVMMKGILSRHIPEDLEKEMRSRWTGCRKLYKCCVYFGCSVTTHASVTPLLQTIAGALLTDDPLPFDSWPYFLMGYYFWALNTFCIGHVLYMFDATWFAMADNLQIHFAVLKNYLENLDLTKRSDVDLNLCLKNHMELIRLCRIFRRISRTVIVTTRMCSMLLLCAGTFVLTSAGDEFTSNDRGNLLSTLIYIAAVFFNYCRCADNIAHQLDELTTDCYSAQWVNAEKSQKTSILNMMTITRMEPKFCGIASIDLDTFVNVMRGVYSYYNFLTAVDVGDESETS…
AlucOR86	MWLREWFKNRSSKTASKEKQVVPVNIDGTPDFASFATCLSYQKFVGLYLDGSVINYLKISIPILFLTTGCISFAMADILNYKNKNIIWLIENGHWCIVYIAAIFWDTQMGIKSPLLLRMSRSVKSGVYKYAKYDTINREDLEKTNSQVVTTSRFCVFVYVVAVLATLVKPTILEEYDPYRHFFNGWFPFEVNSLWRVSIVRVYELGCAWSAASGVCTFFVTFMAYSYHIEAHLKLLIQKIEKVFDPESSEYDYIPQLDKKIRECLGHHREILRVFNDFSEFCDPTIGCATLMATFMVCTLLYLMTNPDFDVSVIVTFSGVVAPEFSLLISFRLRGQRITDLSNKINEAIYKLKWLDQDVKVQKNVLMWLRLTSKPLELKSFGYRNVSNSGIKEVLQTSY…
AlucOR85	MSKAKKSAVGTSSYKELEGLERAEALKKGYDENGGAYIRLGGQYVVSRSEIWRPVLFYADTALAMFELVTASYFSVLQGDMEAASECFHFIQMIFNMMVISANLQYYRKNIDELFTAIGAGFFDYGDTIDPQTKEKMDKHMMDMRANKKFRFKVFVLVVWVLGGCMFIKVIVAHFRFGDTIDGEGGSVSRKHIVAIWLPGIDEWPSYIAMVVAAYLCQVLIMNSIWGFVLPVICFAEELNAQLHIVGIGLRHTTARARHILYRKYGEQKSGNLKFKYEESLREALKSSVQHHNVILEACKCASTLLNLPLMTVMFGTAVLLCMSGFVMVEDSVPIIANIISLLFIGGEVIYAYLFCYYGEMITATSLEIGDELYNDDWWEGRDVFRPYMAMISLRSNRP…
AlucOR84	MYYSPWMANNCIMDTQEYKTARKKDYWYLFEMSGMILDWRPGFYIINLAYVVVMVINAVYTCACLIASIFKVDDLIDVCQYLNFVGLLFVSLSVLASLNFQRERTLETCAIGSTEFFDYGVSFSRSEEIEQYRKEGRRRMKILFMVIPPWLTIIALSLMMSGPIDAAFSYPKINATYVNGIYQMAPLKMYYLHPIDNEFIRWLTVLSQAACSGNTALVIGCADLIMFNAGQNVIIQLEILNLAVLDTDKRASKLYELKFGREPPSDPVDKTNDRPLMNIYGFCLKQIVDHHKIILRRAEVYHKIVNWPCGIVVVNGSIVVAMSLLSIMQGGGKPSVLVLSFFLIIAEVASIFMVCEIGQSITSQCERLFDSMYAFKWMDCSVEVNRAINIMKCRFRKPI…
AlucOR83	MMGEWWKDLKLPAGRHPESAPTLKKIYDDYIRRFDHLKMFKPIFCDTQFKWHTLLAYFGLFLHNTFIGFSYLVTCILNMDDISQASFPANLVIIHLIVLAILYQLVRLSWTENVTIIDNLVTIVKGREEYCKYTGTQYDVYLINRRSKILRRVTQVFTYVFGFQISWLILPVINSVFGEKRVPNEVSNGVAVTLGVPIWTPLDADHSWFYYCIVCSMQLFFFGSSGLFIGLGVFYNMMSQMSILDEMKLLIRSVGELDSRTSRLLTDKYPKLSIDKYSEKYDKCYFQCLRDNIIHHSFIQRTFSEYQSLVSVTLAIPFFFSSIIIALFFADITSGSLTLVELSIEVIHMCMNIFLMAMMCYFGQLITLKNEE
AlucOR81	MGSFYQGITSPSENALKKLQISADTYVENGFFIARFSGMYRWSLLYSISYFSCMTFGIVAAVGYILNVSTTDEWDKFLENIHITLLIVNMEAQGVAYHYDQNGYIEIWRAIDKGFFDYEGTLDEETDEEIAIMKSELRNFKKVFQHNYTMLMCITTVLQFSKKPITRYLIGGGTVDGKNNLIWEAPFGLYFPFADYWIPYLLGLFLGNACGLLILITALGSVLQYIYMSEALIQEFAVVKKTMSKCIERAEQIYRNRSNSNQVEHQQWTMDDCIIHCINQSVKHHQITLRMMNVFKKLMYFSLFAIIFDGGLILCISSYILINDEVGITFRLPMPCVIAVEASLALVFCYYGGKLTDANTDVGNGIYECKRWMDHSKILCPYALIVKSYCNVPNELSAA…
AlucOR80	MVVEVNSRTYYGIEVVYFKFIGFWQFLTNGLGKDKLVISSIVYGLMFTFFIIVQILDMFIKDYDFSIFSEKLSVNLTCFESVIKIGYYCFKRSSLLELLPLYRLDLLLSAKHSPVISTEILMANRRFVNGATKSFVVMIFSTVGIWNCLPLLKCFTSGGCSTLQIMPTWYPGDVSYVPLNLFVYIFEFFIMIYCAALLYNVNCFFSSLALTASAQFELLSNNFANIESNAERRIEDHASSTDEDTKKATMYVLLRECLIDHQTLLGILQKMEDVFNPMFLFQMLTSTFTICLVLFQLNFHTASGDDLPIAMACKFVMYLVFGSMELLVYSWGGQIIYNKSEEIYWSLQKCGWEVGCDKFKTNVQIALQRSQFPVTLTAGKFYVVNLASFSQVIKASYSY…
AlucOR79	MTVVQTNKRTAMTDVHHYHSLLLTMLEIAAVFKKREGSIFSPTGFKMFRVANLIVCFLFVTSCARYVFHEKGAQFFTVAIGTGSIEFCIINMILVSKSDIIDRMLATSAKIFYQLPQNEETRDVLETYRTKGYTFMRAFGMLIGVNEVLGLIKPFWMARLTGQLGLPFDISCLGIPTVPCWIFQIICTSHLIVTVAFHVIIVKTLMYLTWGHSIVITKIMNRRPVHDDEENDRKIIELYCDFSRFSTSFSSLFGLTTFIEVTFTSTRCCFLIYHAIKSLSNNDMEQAIVSVTALIASIAISYVMCSCGEDLVEINQMMRDGFYNSKWYESSPQSRRRMLPMLVLSRVPIRFQYRYYMYFNYEILMKIMHSTYSLSAALIQFL
AlucOR78	MSQRPDPEGPPSKRTYLSKGLKLKSSVRLDAWRHIGYRLLLLGMTPENFMEKFSVRHALVYLIFFLTHSLYSAHELTVALFFSRSLLERVTHGYILTYIFTFNLQWYYMLRHVGNFHRHEMSLENFASTQAHLDFAEEVFNKNINAFLKYLFISMLWWATNTTTHVFGPLVETVLMYVRSGDFKLATVLPQVFSLPMWAQVIMYIHNATATILLFVYCLASYLVLGTRVLKVKTQCDILNEALRRDYDEESNIRSYIKDHINIIKSAKLLNGHMQMLNGIIFTACYLEFATQMFALTLFEPSGAYFFALAFDLMSIMLILVMQCWFASIVTISLQSVTDAVYETNWYRRDKDNSLNVLMMLQMAQQDYIQRIWFKSFKIERAAILNLIRSSYAVYTALL…
AlucOR76	MPNIGWLPFAITSLPRYALGCLCQAIIGVNTVSIVIGTFMSFATLFIHYGAQFKLLRARLRGCFPENVALEKAQEDIYKEKTIRKLKDCYNHHLAILRFHQELLKYYGVLLLVFRVAIVFWLCTLAYVSIIVDVNAHTILNMLSFASAELLYVLLFSIRGQDVTEWSYELHDELYSIQWWEQ
AlucOR75	MDILHYSDQTGFKFIPVYDHMLRSIGVHSERGETQATAIKRYFGNFLILVAIVQGWSSAVAAYDSLKEEDFRAVTNVMSYLSVQLSSFSKFHIARTHMEVTHRLGNWIVEAKKNRPRDMKQPQLEFLVLKVNPAFFYFGLFATFFWCSVPLTNNLQAFIPTQYPFLDKQTSNSISFPLIQVPLYIFFTVTITYTATSLLHFLAIFTTEVKLLSKKWEQVFYDKRRPDNYMELMKDCIQQHIKLLDVMKDLNIIHDSMFAFQVFIFIVHFVSFNFCLVMTSGSNALSSVGPLTMSSLMEFGLLCWMGEEITDALQQFHRSLYMTNWYEASLEDKKNMIVVLEVLKKRHALTGTKVFVASLETFVEAARQAFSAYTLMKGLTTTE
AlucOR74	MVEDLTVKDLTGIYLLPHSVAYMHFTGHWIGAVPGPTPFRVKMYRAFGGTFTWLIVIATAIASLNGMLHGSGMSDISMNLIIISTSISSLHKYSVFIHQEQGLGRLGRWMKRANEQNKISKNPDTTTDRILKKSLVSFYYSGIVAASLLLVKIVVTGYTYNALIPGLDQRYQPLILIFMEAFSFSSLSLEVIMDALILMNSLFVFRRELMKNVDEWRKMNYKSDNPQQFRQQLKTNVQNHVELLTIFQDVKNYCNSMFGYQVFAIVF
AlucOR73	MNTEVTERFEYASKAYWGALGFTGLDAFLYEKPPKHNVLRWYAFRIIYIYFVFVHYPIFITMQFWGIVTAESHTLMQISFDISLMGYNIQNIIKLLIWMIRIKTVRSLRLNFSKFNVNKYRPKLSSWIIKRDAENALKFTGRCYWISYANLLFWVVLPTATAIINYSTYLAGYADWQENDFPRYSNTRFPFDLSQHRSQVIVSFLEVILFTLGFMSFQSMDMFFSVIIRMAQAQFSVLNSALFALDGELDKFWGTEVPVNDCKPPMKIHLIVQDHQRMIRYGVRLRKFLSPILGLETLNCITIICNMTIVASSQVSGGGEFLEVALAAFASSLVVITCLVVFFTFTSMTGQLKDAEESVFYAMYSSKWYERDVSHRKSIILMQKQAMTSRRIKMFGLGD…
AlucOR72	MSVNWNRKLNSLNHTRIAFDVGKYKDGRIYSHKACIRMEKELQKETILYLCIPLLIIILGGAILIVPYGSKLVRGYGMMYTACGVDLFLPIPLYHPFPTHEGIHHFLALISQVLLVFCLMNGIIAGVLNFLQYSQRVKLEYRVLSYSLDTLFARSKRVYLRHYPDKKANFTIRDPEFQHILGSLLRDSIIHHQTLVDMMNNYHGLITYPVAVGYMTGAGGIGLGLLSILRALQKR
AlucOR71	MAPQVNLFKAWMIWMKIAGADPPSVNFPYALALLWKLIMLYGSVHYVIIMFLAIVVGDSAFHLKLEAGLFLLAGIPCSYKHFVFVIRKNKLHEVIDRLNTLLEEVEDVYGTETLAGWQRICNMVMYFYSTQFTMLVVPVFSFFYYIYYWEGVEATPYEVYIPFEKENHIHRVMLYELLSFLGPAAGLITGNIFFGSLTVAVSGVLRKIQEQFSQVSPSNAQFLLHRTIRWHSEIISIVGETNRLLGTVFVVEYLLAMVYICFSGYMLLKVGSATEDVNLNKNIILCIVCIVMPLFYCLCGHVIVLEYDKMSDSIFQNDWVSLQPVDRKKLILPALLAKRGLSLHYKKLLKFDMTTYLKIVKQSYSFLTMLKLMENT
AlucOR70	MARTDLSDVIQLLQFTGHYFSFKGSRREKTYETLQKLRVVFMVICNPFTLSSLFIGGLKKSMGVELFFGLMGFLTAMQHVYAYRHRKTTEDIIRSILEIRRKYQQGSDIEFQQNTRAIWKVVYIYFSAMTSLLVFYITIPKFVDILYGILWDDPVALRLPQSMDAYLDEHQHRNLKYATVALVSSSWSFVSTYSHFGLDTLLSLVGFYYSSLVKTFCNRLKLNTHLTSKELEGHIKILAAHHHELFKLSLKMRSIFGCPYAMQNNFGAFCIVSLVYALLSDDSSGLLIKVANLFNLMILAGMLTSTSYIGQHVTNEISAIFDALYDLPWYELSPSNRKYLVTMICVARDPFTIHFHGRAPLNLANFMAILNTSYSYFMFMRSTL
AlucOR69	MGSVTAKMDKWEKDEQEEVMKLFKEKYGPLIQLALIFPSWKSSSRSSTIMIFVLHSVVLLFHWMMIMISIKRSLESEWNFEMLTIWIHFAFIVFFVFIVIFCVNNQRSTYFRQYQIMSNDIGHHRGADGSIYETDGCVSEAKNIKREMLLYMIIPVLIFLFASTIYGLPYISKWLEGMENPYTLAMVNMNLPVPAWYPFPTHAGLGHFTAMAGQALVALSVGVVLITIILLFLTNALRIKFEFRVICYALQTLFTRSTTLFLQMQHDMKDIGNSEHSYQRVIGSCLVDIVVHHRAVSELISIFEKQVFFTCALGYMVGTLGVGLSLVNILEAMKVGNYVSVLIFSMMASMETLLMFTISQIGETITEESVKLRHQVYDIEWHKLDTQNRKILLIFQTAI…
AlucOR68	MSDRHPDIAKYIKLMQATRNWYFAEDSTSHPAVDLLKRCYYHVRPSLFVFALLANGYGLYYREGFGALDGNLALFPQALASLVTSSTIYFNRRHHRKLTMLLNQRFLDKNEPWMVEIKNKYVSAVWKFIKAVILYQEFVKIFYVLAPVIVDSILHHIFDYLETPFFFPLTFSTFLTDDDKWTGRYYAVMFLNIWSGFEIVANLQGFIICYTVMTVFSVVELVILTEQIKSLDFYRSNGEINEQIRMVVKSHNDNIALNRELKAFLGPACAFLSLFTSLVLTLIVFTTTVTNDLMVILAYAVGAYFYFVAGLLYCSLGQLLDNQSSEVFDELCNLPWYRSSPDVRKSLNMMIRQAHNSLIIDYHGHYMMNLANFMNIMKSAYSYFTILQSVTGSD
AlucOR67	MPVSQSLWNMIEGKMEITEEFEQKVTETPVERTAEDVFSTQIKALQIVAMWPNFKQNSNMELFTRALLKINTFVLAYCTLALFVKGLLTQDLVDRSEAMDIFTLTTSALYKMIFFYTHHKEMDDMVNWGAALAHQVPPKWMQYTTFFSCFHNFMGIFSITFWGLCPIFKWIFGETDLDGMTLPINVYDPIGVTGAMYSVFYIVCDYGLLSAVQIYMASDAYLFTAIHLAIGGFETLNNKLRKMGQINFNKGPTVNDSMNEYLKDCVKLHTHILIYIRKIDRLFRSMIMADVLHAIISLSFAMLQASESKGIFENMKMAMFVSYCIVHQYLNNYFGQNLIDQQEILNKELLISVPWNDGSKEMKKSYQIMMAGCLKSVRLSAWSVYTLQYATFLEFVKSM…
AlucOR65	MSFIVGYFEKILFHFDKLEEPRSEEITKLHRKHFSILLLVSSVDLNLGRKYLFWTLLHAVFNYVVLAAQTCVLMYSTFLLRNDFEIGSGVLNYGLLMIVAIGILMNMQYFRHEVLHISGIMCTGLFRYSDKTMETEDMIKFRKHMKFQRQLLIALAVYVATIGGIVVLGPIIDEKLGMGFDGTFDENGVNRRLPVPLNYPGIDTSKIFGFLLALGMIFQSGVETTLIYGGATLLFATACQFILTEMKTLSVSIQTIPHRAAKKYCRIHNVSKKSLDLKTIFDDSEFQDCITDCLKENIQHYLEIYKFTKVLETYVKVPLLLAVLVITLAIGLTMMKLNEDIVRIGATISFTSVALGELCIMFLIAVYGEYYLTMSQEVNWEIYFTPWYKFSVKNQKLIR…
AlucOR64	MSGFHGFWDKWWYGDPPMDDKIFDAIHQEFNQILYFCGLFPDPRPIRRLLTFGILILNIVICVTYMYLLGATAVLQNEDFFTASQTAHFASCDLLSLICIISLLLNRNRMIEMFRASAHNYYDYDDDAKISEMREEYMTTKKQKTIILIGLPSYLSLIGMVCLMSRTIDEYLGGGSNETNIDGVYQLTPVPMWYPFSIQSEPMHWIAVSSQAIAMFSTATSIGGTAAILVIFSQSISLQFKIIIYRIRKAEKHAYQLYRMNGGKKLKNVQLYSDPSFLGFYNSNLNKLAEHHSILIRQFDSLYQVVKWPAGCALLLG
AlucOR63	MAEDDYTLTDMAGVYLLPHSRAYMFWTGHWVGAVPGPTPVPIMVARALGGTLTYVAVFVVCWGSLNGIMHGSGTNDMPMNLIIISCSISSVHKYCVYTNQEQGLGRLGRWMKRVSNREKKNKIPKTITDHILKVCLLIFYYSGTLAAFMLLTKLALTGTTYNVLVPGLENVLLLKLAIALSFMSLGFEVVVDALILMNSLFTFRRELMRSFEEWRKLNFDSENPNQYKEELKERVQKHIELLTIFQDLREFNNSMFGYQVFAIVFTTCALLYGMAKETENSHKVFVQTMPTATASFLEFFILCWCGEDIKFGFEQIHRSIYDTNWYEASLEDKKSMTIVLEFSKNPIILTGFTVFKANLETFVESMRQSFSLYTILSEMV
AlucOR62	MGWRKYLTEMREFEDEDVRKAIRDNYSILPRLNNTFSYIDEGWVPLAIIHSIAFIIFVDLYLYLFFVTCYLLKDDFVLVGVQFHYLLLALFGLVFQFHLYNSRKEVCVLHKIMAQEFFAYENNEILAEEKTKLKKHMIKQRLQLIPFMILIGMIGLFIVGVGPLIDNMVGAGHDSDYLNGVYMKTPIPMYFPFEIVDFTTHYVATGFQIITVAMLALTISGVVS
AlucOR61	MDTFCGGFMGKVYYLKKHNIYINVYLSCRVNRDNFSSFYRDFRYFLSQFYHLMAALSAALLGGSVCIVFIAIAEHLLAQLEILCISFRNAIGFIPAPGDRVGEKLAYQRVKSCLQHHNIILKFFDEFQKYYSIPLFCMLAGTTVAMCTIAFVVTDPSSTFGVSAAFLSLMAPEVAFCICYCTYGQKITDMSDILRDTVYNAPWYYQPKPVKMALLMALNKTRTPMTLSAAGLKDCSIKSIGEITQTTYTYFNALQLFRGKPAYHRE
AlucOR60	MNDIGGLALAKSGLNNMMSILGGFRGPREVRFKGTIYEHIFIAYSYFGLLVSHYHVICCYLTPIFMPDMSFKDAMFFAVPCITTTFSHLRIYYMAWNRSKFIQLLEMNEEASKDDYYEDELQKEIDGWAKQVRILQPILYFAVSAPIVPWGVTPIVNEVLGNPWGPRKAPIISWYPYNVQETHFWVFTIFIQTMAGCHATLSNVMFDAVFICISTRQLALLIHLKNSFSKIFQVIHVDPKGISWYTNYRAEAVEKEEIENDLTQRLKYGIRKHQTTLRLSKTIVFFLATRFWIICLIYELHMYLFFMEVVQVRKS
AlucOR59	MFVFIREKELKRDPNAMIGRRLVQARFAIFAGIYPDFYGWRHYYFVIFLWIIHPGLYSYFVMVYVLSFVEGLRYMDVELLGQVLCLGTITVIYCLVSIYYIAKKTDVDELMMMAGKGLSNYSRPTTQEEKTILDSKEKSTYKYAIGSSIMFVSVSLLHMGFLPIRRGLKGQYTSITNDTAPINKYTPLPVWTPYVCDDLTTFLISYFTQLIPGCMEISIINACCILYIGLCQQLTGNLEILVNSLRQLPERGLHMFEAERGIVEKFTPELYQNEYFLRCLNTCIGENIEHQYNIIKFYKKIQSVVGFSILAIFSGTGLIISTAAYSMLLIAERERDTEIIITNSFVWSFNLFVYTVLLTLYCYYGQKVTDKNEEVLEALYDTPWIEADMAFRKSVIIAM…
AlucOR58	MSFLLKFIDELAEEEDDELIEVLKNEYGHFLFLAMIFPRWKKPLASFGLVLFYLSTIVLHHAMLSYAVYLSLLEHNWEQVSFLTHLVILLSFAIFQPVNFNWVRRVVAHVHRTLAKDVGIYCSGRIYDDPVCIAFREKIRLEKKFYMTMSAFCLMMGGILWSGLYISKSFSDIEQSYSSSGLSLKLPLALYYPFPTDRGVLHYVILGSQLLVCLVIGFLYLICEVLLINLFLKIKYELQVIGYAIDSLVSRSINAVGVNENNPQKDVLVIEDTKLQRSVEKCLKETIVHYQKILGLLLIARANLDAPLAIVMMLGLLVIGISLLNMLAALKANYIGMFLTFGMLVCAEIQAQLLVCLLGSSITEQADILREKLYSIEWYCFDMKNRRILLNFQACFTKS…
AlucOR57	MTPEKFMGTFSVQHAILFSALFIFHTMYAIYEVTITAFFARSLLETVSHFYIATYLFAFNFQWYFMLYSIRTFHENEIFLEDFKCTQTHADFATRELDENVYIFTRVLFVSCLCWTVNSSTHIIGPAIEALISLIKTGQIDNVLFILPPVFSTPWWAQIIIYFCNAITMFGLLLYCLASYTIMGFKVLKLKTLCDILNEALRNDVEEESNIKAYIKDHQIIIKAAKLLNAQLRTLNGFMFTACYLEFAVQLFALTLIDPSGSYYFALALDLSSIFLILVFQCWMGTMITHSLETVANGVYESLWYSRGNNNRSEVILMTQMAQKPFVQTIWLGTLKVERATSLSLVRSSYAMYTLLNFFQDK
AlucOR56	MSRYGKIEDDELVNSIDIWYLKRSGLWEVFNHYREHGVRNRRFTLWKIITLILFVPIGFFSLCGPFFTETDLEGMTLVILNPMTSSQTVIKFAILWYGIETQCRVLELFKRDFLTCVPPSMQAKASEILTKAAKKANKLANLGILTDVITVSFWNILPLLRSEYFRIELGITAFGTPLRHNKILGFWYPVDYDETPYVQFVYCYEFLSCVWAGFVIALLEGLVIHLVILLTANIKVMHHLLEELKTSNGTLNSETLLTYIKDHQKLVKISNDMRNLYNMMITMELSTGLIILIITIFNFFLSSGNGDLVIMFKFMVYLMYTLVEVTVYCYIGSDLETTSEDLGFAAYSSQWYKVGKKFRKTLQMLMVRTRYSLALKFGRMYPINLMALTNILQTAYSTS…
AlucOR55	MLHEWTLFQKTGSSNSSDKEHYDIKETKHFATCRKVLVMMGFVNDGSVIYKLRQPVFVFLLYSAPVHHLVPAFIDKTAPSDQILMSWSISMLYVLLCIAWPFMIIRSSEIFQLWATVRKGFYHYSDPFTAAERTILSRTNDIVIKSTRVSIIAYFCAGFGTFLKEMQPESLRQYKAPYPGWFPWTINSNFRFALALLYQCAICLNTTFALEAVFVLFAYHTIHFEGQLRLLTRHFGDTFPPGLPATVTYSAEYKKRTLRRLYECVSHHLIITGFHKQILSYFGICLLVYRVIVTIMLCILCYLTTTGISLDKFVQLLCFALALLYLCFIFCLKGEKVTQLSDGWRLTVYEVDWWNHPVEVQKTILMMQMGASKALKVYGVWKPAMYSHEGISVIGQETF…
AlucOR54	MFEPSEEILRELKISRETYLENDFFLARLSGLCRWNRLFSLFYFLSMTYAVASAVGFVLAAFSEKDRDQVLENIHFVPLIFNMASQAASYHYTQKEYLQLFRAVDSGFFNYDGDLDIATELEITEVKSVAKNRKKKFGHFYSMLMLVAGLGQILKKPLLYVLRGGGTKPVDGENNLVWEAPYGMYVPYADHWISYLTGMFLGYSACTFVSITAVGSVLSYQYMSEELLAEFKVVEITFSKCLRRAQTMYENRKNVLKANGKTSQITMKDCIIHCMNLSVKHHQHTLRMMNVFKDLMFFPLFMVIFDGALVLCISAYLTISDDVSLNLRITMPSVITAEATLAFIFCYYGEKLTEATEDVGDSIYNSDGWVQHSDIIRPYALIVKSFCNIPNELSAAGFS…
AlucOR53	MSKFNEYWDNWWFGDPPMNDKVYDAIYEEFNIILYVSGLFPDPRPIRRLITLGILIFNVVNCAAYVYFLGVTATIQINDFVTASQTVHFASVDLVAVTCMISIVASRRHMIDMFRTIANKYFDYGDDFEIPEMVEEYRTMKRQKIIILVVLPSYLALNAFVCMMGRTIDGYFGRASNETYENGVYMLTPEPMWYPFTIHNELMHWMIVMSQATGAFALASAVSGSAAIMVLLCQSINLQFKIIIYRIRKAEECAYHLHRKNGGEKLKKSELYSDPSFMGYFNSNLNKLAEHHSILIRQFDSLYQVVKWPAGCALLLGSLLIAMSLLALLSGDGKPSILLLAALLIVAEVMNMALLCGQSESVQELGQSLHEELYNMNWIELNPAAKKTMMMMILQSKRP…
AlucOR52	MGFSSWIAQQVVTEDEFQIRLKKYGWLHYLFQFSLVNSCYRSMTSLLMYYISLMFSLSIVIFHLFCYIKTALNAYSFGRADMSVANVHSVVLGIFIISVLTSYAIDKTKTSAIEQLYLESFLSYENEYPAPVTLFQKLMTLAGKMGIASGGMGLFFNVYVAAPMIDFRFWKESCVVKGINFCLALPHYYPYNSEDGWSFYLTELFQLMFGVYRISVFCAVQVTLTVWPLHLIQELTRLKTSIEHLEERIKKRYHRITMRNVEKVNLITMCMDKTFNECAKFCINENISHHHNILKYHERIDGIMALPSFLAYTTGTLTMGIAMVKLLSVEGDTTLGGNLAYVTVLAAEIGFMLLISTMGEAVTIQAEEIFNEVSHIPIENYDLEFRRNVIIFMEGTIKP…
AlucOR51	MSVQGEVIASKAFKDNFGRYMVWSGMYSESKIYSGAIHVFFLVHTVFLAYTVILSLDDEKLMGESAHFTAFRVSAFMLMINAVLNKDNLEILFIKLGQNQVHDYQNTLSDQCKKEIQAVRKNCDERKDFYGTNFLRTVSAALVIFWVRSLMEYYRGHMDNPKSDNGVNKNLPVPTYLPYESHDWPGYQFALLSEVALVMMSYFLVLGHDCSFICFSEEVLRELEIIIITLREVEQRSDHLRKEMLYKISQKESVHICLKHSVIHHQKLIKIFGSFKRYCFYSLFFMLSGGAFLICLSSLMFTSEKISHQDKSVFMMFLANELFHIFIFCYYGEHIMDRSIEVGNSLYNSSWIRIAQYVKPAFIMVKLRCQVPLSLSAGGFITAGFDTYGNVLRTAYSYL…
AlucOR50	MGEKPYTMDKNGEMEIDWLTQEDKNHINFFDQFHCWSGMWRSKKSIQWTYFWLSQMIAFSLVYFYSFYFLLSELELLAHLIHHMMVAADDIMYIYLLNIHRIRVETIHDYASKTYNYDSGIVREKHKKLMTEQLKLYPKMSKFIFLTTVATAMSLEVNYLLEATYLKSYVTMYPMYLPIDLNHPVTYTIVVFLQHLQVFISMILCGGLMSILFVVWSHLKVELDTLTFAITHVDELVEEKLRHFSYTNPADKEKAKAEFYNGFCYHFARHHAAIKRYFGAFQISCKVTMTFVLISGLICFACVGITSVTENIGIKLKFFVVMVIQTLIIYSWSWVGQDISDKNAALQNIIGGTHWWKMPKTCHSTLKLMLVGTSRPMLLYTLIGQPNNIDSFMDMTASS…
AlucOR49	MIRNWQEEEEGTTLLERMGQKFLNGHSIYLGGWVLRFPVRLPPFFYLTCAFGLIVKMILNYDNLTLIIDCAHMMIHMIVGLQTTLLALKQKGNIMRLKTQLDNFGYVKDLETAGEKIKEECEQEAMELYKPFSRCILITINVYILFPICKLFTEAGRAKLSRVLVWQMWMWVPDDTWWGFTIIFLFELVTSLFLLLSVMYTVPYLACLGKMTVGHCKLLALQLESISKKATQAAFTSGSFKAALNHEIDECARRLHETHMLANEVAEVYKYYLSSFYYGGMFALCMSGLQAVSATENIEESLKFMGVLTGELIAIGLATYVSEGMIQAFADVRSSI
AlucOR48	MSESVAVFKSLNLALKAVGFVDSASGIKSYLWTTWNFIIIFIGVEFIAITIPLNIIQDNDIYLKLECVLCIYLNLSMMFRFTVLTIRKKRLFSLINRIESLLQQQMEREFDKAFITALARRCGNWAYLFTFAMTATCIEPVVMAYVKYYFRGVEDPVPFEVNLPFEKKNNIHAVVWYEVFQFLGCSMIVISTNILFSTLSETTSELVKKIAENFEKIDETNADYLLKQTIKWHTEVIGITKETNDILGITIFADAFFALQYISIAGFLLIRVGLSNTTSFSKYFITYICVLTNPIYYCYSGHRVSLMGDVLYDSIYNNKWYRLAPKTSKNLILPLMVARRGLSWNYKALNFDMALYLEIVKQSYSLITFLKMMK
AlucOR47	MSMSVWALTIGGLRSSLGIEMTYACLTIMTTVQHFHMYRNRTRTEAIIATFQEIRNTYQKGTDIEFKNYTRFMWKVVKVYIVMIVGICSAMSLPFFADLVVWFVWETPTAFRIPIGMDSMVDKEPVRDATYFAVVLFSNCWTILGGVTQMGVDTFLFVSCYSLSSMVKTFCKQLKVPPNSTPEETTVHIRLLAAHQQALYKLQTEIRRTFGFPFFVQNLLGSFCICSLLYVMSENGATLLSQFIYVFNMIAVLMILASTAHVAQHVKNTTSEVFEALYEMNWYTLRPSDRKYLVTMLGVARNPLCIHFYGLLPLDMENFMSMLNTSYTYFMFLKSIG
AlucOR45	MLIHSDIDKYIKFMKGYCVWYGKSVTWDDTRFDLCRKYYTESKCYLSAVLLCVVSFALYSTDDFGLQDGTFIYWPICLMMLVLTSIATATRHQQDVLTMSLNDNFLENTESWMRAIKDQNINRLWKMLRFYTVYNNTISALYMLVPLVVDSILHYGFDYLQTPFTLALPLTPLLKYSNTWNAQYYVLTAFNFWSCAEMVFMLEWFLGNYLLLTTFFLTELIILKHQVKSLDFGKNEEWDQQVESIVNKHSKIMKLNVELRDYLGLPGAFISFFSSILLTFTAFVSFTSTSIPLRVSYGSGFVLYFGAALLLTTIGQKLENESDELFKAFYSLRWYQYSPNARKSLNMMMRQARTPLIIDFHGRYKMNLANFMQILRSSYSYFTLLREVAKE
AlucOR44	MKSKVFYFTDDAPKSTWDKSTRIYHRLRPVLLVVLLIENAIGLYFLEGFGVMDGSIIYLPICLLLFVINSTAYFSRKAQDRLIATLNKHFTESNEPWMLTVSHKYTTKVWKYIKLILIYDKACKCMYLAAPLICDTVLHYVFDMLEKPFYLPTFITPWLPKDVTWGPHYYLILVFGWWGMLECLNGIMGFMIGYTLLVTYVLIQVVIFKEKVKSAKIDGSQEEVDAEFRTLLSWHVDNLQLNRDLKAYFGFTCAFQSIFLSVGLTLTVFTAVSSKVIAVKIAYGVGFFFYFGTGLLYCSLGQLLENEVQSKHSEKFEYDYATVSHTAHTRLPRSMQNELRKFHADFETVLFIFYLTTISNIVGLKFFLPSSPTFITVGTKVVGTKVVGTKLAS
AlucOR43	MRGTMELDDEEVMQTLQESGLRTWIGVIAGFRFAQQPRFKGTLKGRIYWWYEILTDLSVAINGISQFAALLTPEFRMIDRCLMCFPAASCLLCLFMSNYPRFKRKNFRSLVEEYENSFSDSQYRHHLEEQIRKGAKHTRSVIMCLVLLEFISMFIFCLILPVLNEATGFAFGPRRLAVPSLWLWDPLAGFWNYMAVVFVQLCGSVFVSLKKIGFLESFFVYASRQICMFTHLRYNLGKITDPLIVNDDGKVDVKEFTGSNRYLMKRKLIGWVKNHQNCLRLFEDLVKLYEWPLLVYFGATILILCTATYVTSDNSIDAQTCVICGVFNLGIFFELLFICRTGDRIKHESEKLLGALNGKNTFLLKSDEYKYLKMILTRCQSESVINASGGFPLTITTFI…
AlucOR42	MRMTENGKNSDPDSLEIAEEKATKYLYQRFFVLPVVGGVFGFHQTRWWSIFTKTVFTAYYVSVLSTIVTLSYSSYLNRDNMAVASGCIHILITAFVVLGISLTLQRLRKDVVQLLSLDEIICEYQCSEYLSNLIRKSDKKLRFLLIFWVALYGSSAWIAVIFPFIDVYLGYELSLSNVTDVYWKGLPFASWWPMDADNSNLAWTTCFMSQGLYAFFAASSATSGMLCFAIFSEDIFNHIKLLVNSIERLEKRAKLMFKMLHPGKSLRNSLDEYDECYYNCILQNVKHHQKIVIKKDLLMKIANIPVAVPFFGGAMLLGLAGINLLSDGDIRIAPKVLFTCLGVTEAAQMFLLCHYGEQFRTQSELLFNATFYTKCYRRSMKCKRAMMIFRLGVSRPMAI…
AlucOR41	MGCLQAKIEEWSDAEDEEMMNSIRRRFGLFCQLSLAYPSWKPGMRRWTLLLFFIHTVLLTTHSVLLGISGVLMVLEWNMELASLTIHFSVILFFAIFIVYWMNSQRPLYTRQNMLMVTDVGSYKSGRIYDDDFCVEERRKNKRELLYYITCPVFISLTAGYVLTVPYIQHWLYSSGESPYTANMVNKHLPLPCWYPFPTHEGVLHLMVLLLQLAAALCGAIVLVAILLLLIFNTQRIRYEMRVVGYSLTSIFHRAKKMFLEQNPHRKGDNLRDDPGYQKVIGICLKDTIIHHHAVSEILSLFTKQADMPAALAYTIGTGVIAMCLFNILMALRDENYTSVVLFSMLVFVETLVMFVMSLCGESITSESVNLRHELYFTKWYNLDIENRKTLLNIQTNLV…
AlucOR40	MIPFVFKRDDSVDHEVVKGYQSTYNYIMRFCGLYPDFRGFWYYISGAHLNTVHLAYIWFLAAYMISTYYAFAYRDMELLSYELCYGLVTLIWFTVTHYTIYKRDQLDSLFRKVGRGFFTYEKPIDSEEEAIIDECNTNCRKTFQKTLALTTILAFWTCIIPPLPKAVMGDYSSIVEGGVPVNKHLALPTWNPYPTDTHLTYWTMWMYQALAGCTEAYIIGATCILYCNFCTIINRELKLLRFSLGNIKNRAIHAFKMRGYSLQLGQKYENSQLYQVCLVHCIDESIKHHIELKQFHGAIQNLLGFPIFAIFSGSALTISSPMFMFLQMIGEHEESSFTLVMNIFQYTIIIFGFTYFLANYCLFGQSITDESALLHFAFYDTPWPEAGLNFRRKVLMGMI…
AlucOR39	MGYRVYPQQDLSDPSHMFSFQLNALKSTTMWKPDNQKYYIPFMILFAVNVFVLAICTVGLLLKGCSTKDLVDRSEAMDIFTLTGSALYKMVFFLYHYEQLVDMVTCGLALVRNLPEGWTKNCGLLSRIHYTAGFLVLLIWGLAPILKVMYGETTWAEMKLPINTYDPFDSTGFLFFLFYITGQYVLVLSAVIYMAADCYLFTSIYVAVGALQYIVDQFENMRDLNNNNKHTVADTMHDCLQECIEIHVHVLDYLRKTDKLFKSMILADVVHAVISLSFAMLQTSESKGIFEGVKMVLFVQVCFVHQFLNSHFGQELIDKQDNLAKQIITDIPWTDASRKFKKSYYIMLTCVREPFKLSAWNVYFLQYATFLEFSKTMIQYYMVLQEVQDEAEVS
AlucOR37	MTPKVGKSEYVIKDTKVFATCRIPLVSMGFVDDGTVMSKIRKLITVFLMYSAPVHHILPAFVDETINLDGVLIGVSLLMLYILICVSWPVMFRRSNDIIKLWKTVQKGFYQYSDPLTKEERTLLSETDDLVIKTTRISIIAYFCAGFGTFLKEITPSSLRAYKTPYPGWFPWTINSNFRFSMALLYQLALCLNTTFALEAIFVLFAYHVIHFECQLRLLSQHFKDTFPTGLSATVTYGAGYRKNTLRRLNECVRHHLVIKRFHEQILSYFGICLLVYRVIVTIMLCVLCYLVTTGISANKFLQLLGLALALLFLCFIFCLKGEKVTLMSDQWRQTIYEVDWWNHPVGVQRTVLMMQLGATKPLRIYGVWKPAMYSHEGISVIGQETFSFFNMLRAMK
AlucOR36	MLTEYNLRFLKVLHYYGFWITFVGWKHDKIKKICLPVRGVVIGLSSILAIYKLGQEGIQCIINGTVVYFPFMVYTFTIPILLFKNRKHFLSLLLDFEDCWKFFCEEKERKVLERHYKRIWKVANYVHICFFFEIAFYAVMQLALDSVLHYVFDYLSKPHVLTYPHMGYLPTNRTWDGLYYVVAVVGCYNLVETLSVQLGWVILFVVIVAYCYPILLLTEKAFKNLLQYDGDPDSAALKKAVQSHQLLVKLNKDLKAFLGLPCAFETLFVSIILTLTAFTSVTSTDALVVGAYSSGFILHFLAALLYFSLGQLLENKSEELFTILYDLRWYTFSPAVRKDLNMMIRQARKPFVIDFHGNYKFNLENFMQILSTSYSYFTIIQTLTDNH
AlucOR35	MGLLFGRTPFYIKSGWLRFSYKSLPFVYALILAFANWFCLLYYIDHLHNTWNQTLGSNVSFSGVLFAILVFSQPFSTIFMVYSWAFEVPAIVRGYNSTAVLEEKISIVFPLYKQKPSKRNLVTFLIAFLFVVDLIIAYFLLKTRFTETPLILILLIIVNVVVTFSYCVLWCFNCYFISDLAVKLNKYMLQCLQVRENCAFKIKTCRKIWISVWKQSQMNSQSIAVSLSFALVLYGMIFVVGCYGILTSIRNQNILETLEMSPYVVVTFTIIACVFETSYQASHKLGATFLDTMIILDKDRVDHECVEEIDKFVDTINRTRIAAITLKDYMTMDRTLVVSFLSYSITYLIVLIQFQDKNEEPSVNISTPMRNNTL
AlucOR34	MVTVAVLTLTYVFTHEVVTQTDFIIAINSYIVSMTFCAAAFKILIFLVLQKEFKKLFLMVEELGDLDMYAPSTKDHFFNCYMYVTLVLTNPCTWSLWHLIAHNDIPFKSQYPWGDDGVGYLLSFFFGIMAAVFCGLSHILVDTSFMMVIAGITLHVDKLSQSLSLLGKHRFKDSKIMSAGIDKHAQLLRVSQHLSTCYSNLFVGQSVYTVGHSCVLLFGAVHVESKVEVVMSLGTMLVTSYCQLLVYCYYGELLTSKFSDLVFDSYNNAWYDSDLQVKRALPKFSLMCHRHVSLRGFGKVIPSKSNWLHSLQESVSYFLFLKTISGEE
AlucOR32	MSGDISRFKAKSTTTNESLMREEYIRKGIDENNGLFLIIGGMYTGYLPISILHAILTAVHIPLLLAAVIIGRNDYVVVSETIHFIILLSLAFVISMRYLSVRKKLDNIFEAMGRGYYNYEGTLDPGTEKEFAIHLKESEKRKSVLKYVFVGGCIGALICVSILRPVLQYYLKKYIKSKKLPHGLNGAKNTFIYYPWDSSNTWLNFIGYFLQDAYTLMTANVVFGFVLMFVSTAESVVVQLDKLKLSLKRIKIRAAFIASINHEDPATNNNKDFRRALHICIKHSIKHHQLISRIFDDFKSINYLLLFYLIGSLTFLLCMSAVLFAADDVSLISKATFVFFITSELVATFLVCMYGEHIAGMSSSLPMDLYNTEWYHFSNELLIYYRMLAMRCTRPCQLT…
AlucOR31	MNGNGAVLNGVTESSMPIKRPRKLKKVPNKRSIQFETDRNEKKVEKFLSDEEALKKGFDENQGIYLVLGTLYRTSLWSWVHTVLFSLTALFMMVCLGRVAVLISDDFSLLFETIHYITIIGGVLVILPPMMRDEFRFEKIFKTFGRNVYSYDMLDEETAQSVQKLRAQGNREKQLLTKAFTVMLLGTFAGFSVLLPGMYIINGKFFERQRDDGIIMGIPCVLWFPARVGDDWIIFVRVFLLLIEEYAAFTVVAFIIGQQTSAICIGHTLLYEFKVLSLTMEKFVRRATKLAEGKKFEGIRINSEKQLYEKLTACLKDSVKHHDILLDVSEQYKSIFYVPELVILLSSTMVICLSAISLTSDDIPLEAKALSLILTGAEMVNVFVNCYYGQVLLDAHDEL…
AlucOR30	MVEKSNFHVKRAQLFKAYNSIHWLTLTKWFYEDYPVEKLWSDKRLWIHLSIVIICQSSITMFKVFHLISEENFFIFLTSLTSFLVIVLVAVRTYILYQFPTFRQLYFKPEVFNCNLHRPTRSLALLTEAITHSRKVGMWCLVLFITFDVAFLVLPIVPPILEIIDGTNKTYDELIPQYPSINPVSLSWLSKELKYAFDLVMAVFNTIPWVGFVVVYYTVVQLFRAQHKIMMTAMLPGPPVPGDGREPLELKLWIQDHALIRKLVYKLRNTISPALAGTICVNVFTVGLNMLALVSSPIGSDAPMFTRYLYYFSFGTYSALSIFDIFIHCWLASEITNCGEDLSYALLKSDWQNDLKRSHHHYVLPLMLCKKQIRFTGLGLIPVTLTTFTETIRVSYSYF…
AlucOR29	MTEAEVKDGTKKVDDKLGCIDYRKYTFARMIMIDDGLAARGLTFPLLLIMVVNVGMQTCSFISIFTSTQTSVSLDNIRACLLGTSVTMSLFNQFISRQAIARLHGFFDKSFRTISTNPNFPEEKIILDDARKAASSQLEMYVKMFSCNAVAMMFAQPLGELMSGHSWRKLPVQWTFPPSDDEFSFWLIFAFQFTGICIAHCVGIMIMSFTSITIQMTALFDLLIFSIQHIEERATARGRQSGGDRHACLLACLTDDVDFYQQLIREMDSVTPHLRNTFLIISAAVPMVLACEAYPIMQGNFSFADLVKSFLFLSIQILCWAQTCSRLGTMTDKHAAVFAALYDSPWYEAGMKYKKLVLNSLTYAVQPKYIKARLSNEVTASMATFYSFVMSAFNLLNMI…
AlucOR28	MAGYGRLEDGDIVDGLSIWYLKASGLWEMFNHHRETGGRSKVLKFWMAGMIIAYSPVFVVSVVGPFFAEKDLEGMSLVVLNPMSTVQMVVKFGILWFHMEKQSRLLDLMKKNFLACVPPDKEAEVSRILGDAVKEANIYTFFGTRINIITVLLWSILPVLRSEYFRITLGITIFGTPLRHNKLLGFSYPFDYDASPGNEIVFVYEFLLVLSAGLIITVMECLVAQLVVLLTAYLKVFQYFMEELKSTHDPKFDKEQLLLYVKEHQKLMRVGDEVCDLYNFLITVQLSTGLFILIIAIFNFFLSSGNGDVVVMIKFVVYTLYTLVEICVYCYAGSNLETTSEDVCFAAYSCEWYEMNPDFRKTLQMMMVRSRSPVVLKAGKLYPLNLITLTNIVQMAYST…
AlucOR27	MDGNIERHFDHMEKFLKYYWQWYGYPDTFKGRLITIFNIFRIFLLMVLVGIAASQAYFYGMSYLVDGSAIFLPLGIMSLVLNSHQSWNFGSIVKTAKQFELFLSSFQDEEERNLIASRMKERKRTVLQIVLIIEFYLMAPLMCHAISMTLHYYGFLKKPVLIPLLFEMFLEGNYELGPKLIATAVVSVFYVHLVANIVTMILLNVHFLGLVVACLEVLTERLKGFAEKTQEGYGKLKEELDLRDTIQQHADLLHIINSFNSWNGFLVTFCLAACSITFCLDALTTKRALEQEIYSGACLWGSFLLVMMVLSYLICDSGSQIETKSEELLRAVYNLPWYRGSSETRKAVWMMLTQGNRLIILNYKELMDLNMVTYLEMLKRAYSYFMILSSIE
AlucOR26	MGYVWSKLQLKIKLWDSWEDEFSIDVMRHRYRGFHRIGFIVLDLSSKYAKLSIITALLGTSFLLMATLSLLATCAKMSDDFEECSGVCNLGFLSTLALAFLVNHNYFRKTILSAHHMLGKGFHDYQEPEYSSTEFEKYKTMLRKQNVALIILACYVALIGILVVVVCPLIDESLGFGWTEPYDEYGVNRQLPVTLWLPFYSHEGINHWFTFLFIEGLGGAMICLSIGGSALLFTSLTIGTMLEQKRLVLSIRDIEQRARHRFQTQYKGKPGVDDEGKNVAL
AlucOR25	MSFLFKFFAYLAEGEDDELWDTYYNFYGPFLEISFVFPSWRRSRIPVSLTVLGFFAFTFPVHLWLLTLGIEGVRDDFNLASMEFHYWMLLMFSMISIFLMNSHRQNMIDFHRRLSRDVGFHGPGRIYDEDYPMKLEHNKRKQLLQFLFLPGLVLVLAGATLILPYLSKMDGTVLYNSREVNMKLPIPLWYPFPTHEGILSIMAVLGQFMAAGGLSAVIMTLDLIIFRATQAMIFEYKVLRYAIDTLVPRAKRLYAQEYPMMDLESVKMSDDAFQICIGKCLRACVIHHQDINRLLNLYKVMLKWPGFMAYGFGTAVIGLSLINILSAKQNGDYENIVLFFGLSMAEVLNMLMMSVFGELISTESKELRQELYFIEWHNLNTFNRKLMLGFQMGLNNPVI…
AlucOR24	MISLTIGVRKQLQSTTNIMDNMFSFFAATPSFLGMGKIICLLRQRRALRRIWKSLDDLLENVLKRDVDEQLEKELRWRLKRCWAMYSIFLTVGTCITLHWLLRPIVYALYGERTSIVSTWPTYLESWIQWFTTYIFQAMNISSIGHALYIYDNVYFCICENLLIHFAVIKHHLHQMDISKGKPGGVTMKFCISHHVKLMDICMELRECSKYVIMQQVFWTIFILCPGVFELVSGRQTDTTILFNLMEITTIMTCILFFYSWYSNEVTLQSSQVFNTCYMSNWVEGTPNQRRTMMTMMTRSMKPMIFGGLVNVDLGTFISCFFRC
AlucOR23	MWLKYPSDEELNRLGICRSTFDGNVFFKAQLGGLCWFSNSWSVFYFISTIFGIFSGCGFAYGVFMEKEWEALYEALHYIPLVVNITSTAASYHYTQDEYLQVFRSIDKEMFDYEGTLDEQAVEEIARMKTEARARKKKISMIYTKLMIVAFICQTLRKPLNYIIDGRGKKDVDGENNLIWDVCPFGIYMPYADYWAPYLIGHFLCWSCSAFSAITAVASALTYQAICEELLADYSALDLTLSTIVQRAERLFSNMNRGFTGNASGTVTFDYCLEKCLKVSIKHHHEIIRLFNIVKKLLYIPLFFTIFDTGIVMCFSGFIMISDDFSPKFKLLLSPVMLAESGIAFMFCYYGEELTEMNKNIGNRIYFSQDWMKHFKSIKPYALTVKSYCDIPNELSAGG…
AlucOR22	MIRLRLPPTINQDTSQKNIKTIYEELDSQFHTGIRFLLMGASPEKFLGKLSLTYVLIYLSIILFFMLYALFEIIVPFFFPGDFLEFMNHIYFGSYCLAFGYQWIYLLMNLNNIYLNRLNIESLYSTQAVSGIAEAALRKNLRPFKIAIKCSIALWSITILAFGLGSLIEIAVEYLLTGEVESYAIMSTFPFPPWGQMLVTALNFVTLNMGFAEVVAMAYISSLLALEIETQCEILCAAMLQDRDDWFKFRGYISDHARIIKNAKWLIGILESLNAPTVFSAYILMAIEMVVLTLVEPDGLFFVAMASDLMGVVIILIFQGWISSKITLSLQSISFAAYQTSWHEQDKNKALDLMIVTQMAQRTYVQKILLGTVVIERGTVLQIARSAYSFYTLLMVLQS…
AlucOR21	MFLVFMVTVGILFQGAKLLWNKNETTFDLLFSLVHGRENHCTYTGTPYDEFLKSRRHTFLQYGPTLFTYTNITVMSMYVWLPPLVDCIMGVTHHPNDPHNGIATTLGLPMWTPLDADHSWTSYFIVIYMQITFFRIVTVSWAFGIFYTSIFQLTLLDEMRLLRKSLQEIDTRATQLFTLKYQRQPVNRKTKEYDDCYYECLKENIIHHQFIRKIYGEYQKRVGWTIAIPIYLSSVVLALSSSYIMLDNRNALKRSMDVLRIIGDSLLTFLTCHAGEMIAYENDELRNELYNTEWYDRSKKVKQAISICLHITYMPMRLYGGYMVFNHELLSTIVNSAYSVFNFFRVIQKSAK
AlucOR20	MVIQVRNMEQGLKEITKQYYAAAGISGISAYLKNDKPFFLIRLWVWISTWIILPQVTLAHIYTALFTGIPLATRFLSLSLGLDQLQTTIKCHYMLHNLNRFRSIMLDLETFNCVNHLGTEALTTMLKMCKLVKWLRSTYNFACYFTFIAWTLVPVVSTPKALFYAEDGVSMMKVLPPEYPFSTDYFPMVQLIYALESFSTFVILTYFASTNLIMVTDILLICQLFRVLNESVAPSKGRKAMTLRMFAVDHQKLLKICAEVRDLLSPLLALQLGISVMTITLAVFEITMVNQASSEGGINQVVLMSRKTSYTFIIFVELLLYCWLSTELELSCLSVRNGLYNSEWYKYEQLGTKDYRNYIMICMRALKPVRLTAMNIVTLSLTTSMEVLRMAYSYYTYLK…
AlucOR18	MSFSFVEKYQLSPETEKTMVTEYSYLLYVGGLLINYRPKVWIISIAQTSIFIGLITSYTIIFIISTAKSSNFVAFSQNLNYASLCCICLGLYFAGLSHRSAFVRLMEIIHDDFYDYGDSFDNAEVAMWKSSLRTFKIIIVVGIPTYLIIIAVSIVLGDYIDTALGYDSTDEDYLGEIYQKAPLNLWYPFVVTNMFLRVAVTLSQMTTAAILATTLATGDVMMLFLGQTVALQLRILCLAATKMDQRANLMYEKGLARSSSGDKEDLDGCYKLCIKQLVQHHLIIKEFYKTYYTIAKWPTAIAFMNGSLMIAMSIIVAMNGNEETPSTYISTYLLLVAEVLSMWLLCETGQNVNTWSEKLFMDTYEFNWNGLSVPNKKMLLIFKENIKKPLLMMAGGLTP…
AlucOR17	MSKLKNLPFITILWREFKFLSVMGGTYGFYHTKAWTAVTVINYIVMYSAMLFTMSVLVYTTYLLRDNIGYMSQALHLLIVGCVTTTASFTITINRYKVEKFVVFFEDPWSLCEYSRNDFFEELMKETQKKKTRLIVTWILIYGICGVIGLLQSGINTVFGTQSELTDVNGAWVILPFIMWWPEDITASTGAWMRAFLVQSLYLYFCVIMVISGVVFAFSAVERILDQVKLLIYGIKTLDRRAKDMFQQKFPGSDMKYMEKEYDDCYYECLVQNVKHHHKMIKWIETFLDMASLPIAVPFYGGAVLLGMALITITEKDDPRVGPKCLAACLAFSEAYNMYLLCDVGQRLENLSQELYDTLYFSRWHTRSPKVKRAIQIMKIGCQKPIVFTAAKLLVLNMS…
AlucOR16	MTLLSFFKDKFKWNEPLGITETTATLFGAFVNYAPSPGYRKFFRFFGWYIIFMFIIFNINVVLTIYFASDFFEESLEAVRLFVTAIHILAKLLTMRAMEKQYMELIEQIRRAWRTYEYSSGDMLNKTLAAANKGTVIVFVAIGNTIPINVIVAALKNLGNPPEIQFSMQCWVPPSLRTSFLAGSFYQLTPYFFPVMLYCMTISFLNSITLHVEALGLALAKEIRSQKEWRDEAARSLYIKHQEVVRIVGRVNDLMASNWGFEMMCATLQLTLVSYNALRTLKKNDVAFFNQANLMLVNFLVIYFIYGNGNRIIKMGEELHNSLYDTKWYTSTVKERKNVLFMMFRTSMPMEYRFKIAHFDLPSFAKLVNTVFSYITLLRSVDEPEEQGAF
AlucOR14	MLTVGSSAHNSLSRILEVIGITRYKEASFFSENSFKLFRVVQWALNVLMIVSCLNFIFSESVDDSPDKLQSLALCTADIQFLTTQLILISRQSLVDDLVAHLRSVYHGIKEIPGSMDILAEGDRQARLFIMSYGVVIFSNVPSSMFFAGIKMILTGETAYPFPMSIFGLPTAVGWALQMLMIANAANILWGFYCVLKTVIYILGAYSNVMAHMLRERPIDVEAKNDRKMLKLHCDINSLSLKLVNVYGLISFLEVTVASGRCCFVAYHILLAVQEGDYKNLGVALSTLLTSVAITYVLCSCGEEISMQSVTIRDGVRDSKWYAVSPPARKTLLPVLLFTQRPIQFHYRRFVYFNLETFRNVLKTAYTMTTALAQV
AlucOR13	MAFIMRLIDKCAAMENDDLDRLLDNYYGPMFKLGLVFPSWKRSALVFTIPWFILNVSTFTWNLILLGITVYKAFLCDNDMDLFSLSTHYFLLLLCGSLIIFFMNWNRKLNGLNHTRISVDVGKYKDSRLYSHKDCILMEKQIRVESYRYLCLPLLIVLICGAVLIVPYASKLFRGVGTMYTTCGVDMFLPIPLYHPFPTHEGLNHFLALISQVLVVCCLANVIVAIMLNFTQYSLRVKLEYQVLGYSLDTLFARSKKVYLKNYPNEKASFHIRNPDYQRIVGSLLRDSIVHHQTLVDMMDKYHGLITYPVVFAYLTGSGAIGLGLLSIVRALQKGDTETLLLFSLLMLGEVISMLTMSLIGESVTEATIMLRYKLYDIRWYDMDIPNRRSLLNFQTFIT…
AlucOR12	MKFIDKLAEEEDDELIEILKGNYWHFLFYSMTFIRWKRPRIAIALISAYAIWIIVHLVIGIYSIYLAADERNWAVVGLVTHHMVLGALAIYLPIFCNTGGFREVMADMHRTFTTDIGQYSGGNMYAEQACIDIKKDVRRQTFVYYINPALVAAAGSLALAGPFLTKWFSGMENPYSPNGLSLKLPTALYYPFPTDSGVVFYAIVLTQVISGTILGYLILAPQLVFINLSQNLKRELRFVGYSMETLVRRAMRMTFENNVWKRKVTELDVDDTEFQQNVELSIKETIIHHQKASKLLSTAQVSVKGPLAASYIFGLVTIAISLYNITLALKTNDIGSLTTFLLLLSSEVIGTFINCGLIGSELTEQSEDVTEKLYFIEWYNFSVKNRKMFFTFQTAITQP…
AlucOR11	MFRGKEKERPYVIKDPKDFDTDRLVFLWLGFVYDGSFFSKVRLTVFVLLLYSAPIHHMLPVILDKSTTTDEVLIALSINMLYVLLCIAWPFMIYRSPEIIRLWSTVRQGFFHYSDPLTSYERTILSKANDLIIKSTRMSLIAYFCAGFGTYLKEMSPNSMRLYNPPYPGWFPWTINSNFRFAMALLYQLSICLNTTFALEGIFLLFLFHTISFEGQISLLKQHFEDTFPPGLPTEMTHVPAFKERTLKRLKECVRHHLVIMDFHKRILSYFGICLLVYRAICTIMLCILCYLTTTGIALNKFLQLACLAALILYLLFIFCLKGQKVSKMSEIWRETLYEVDWWNHPVEVQKAVLLMLVGAGKTMTVYGVWTPAMYSHEGISAIGQETFSFFNMLRAMK
AlucOR10	MDRHEGPLSTHFRRLFRLVGVYNGKYITPHSCLFFFSGFVNIIYLSYILIFTDCNMTKVAHFIILQYFYIGTLWTVVYKGNDIIWIANECDKFVGLDGHHFERLYDEVREQEKTSPATKGKTIIDRIASIICTWTCIEPFINAWTGKAELEFPFTGTNADTTKFIFIYLMQCSLMFIVAIVCSVIFKSLMGIALDLVIKYKVIGLVLSSLNEQMMNHRNVYKSDLHQTIRKCVQSHHHVLRIFEKYRDICTYGFRYSYVGLIGATSLSRSLLSSDDPDLGTIPHIIAELSYMGFFCYILNQVEQEHDKLKDAVFAADWPWLPKPATSSLRLIMMRTAKTPRVILVKGGGPANLETFYKLLNGTCGYLIFGLVLDQAAF
AlucOR9	MNLIGLPPREDDRKAVDYRKCTFFKILYTENETGGKVSMARGVFVIVTLSIMATCCLVSVTRSQTAEQLLDNLKGMHLEVMVLMVAINECVSRKRMRRFMSYVERFRANPRYDLPGEEAILVQARSNAIRDITFLVIIFGANFPLMMLTKPVTEALGGGSWKQLPFPWTVLPDDEDTTFVAFLLLHTLGVFFSHCLGVVGMCFSTITTQITALFDVLLLSIERIEERAARKMKQLGLSYQESMLICLKESVAHHQELVQEVRSEKPHLESQFFSEIVNISTIMACEAFPLVRPNLTISIAIKGLVFLVVQVLCTAVLCDRMEIMADQNTEVFAALYNTPWYKCGVEYRRILLNGMTFCRHPLTIRGKSFLGLIATRATFYTAMVNTFNLLSMIRKMG
AlucOR7	MLFGAGSKELGFRKETIEEEDVGFMQLAGLYPLTRGYTAYYFISFILCTTLMEGMIVGSYLEGEVDTSLETAHVLLISLNMFTQICTHRYYYDIVNKLLRAIDDNFFSYGDTMDEDTKQVIRKLAKEKTARKKMFGKVFKIQVSSAAIAITFQRPILYVLNGRGVKDVDGENWLIYQSPFGILVPFSNYWVPYLFGMVLVVNQVITTSITAMATATSFVRFSEELLHQLEIVKLGLGNFMFRARHLHSLRYNQSKESGEQDKHLDKCIITCLSKSVEHHAIIIKLFGDFKNMMYIPLFTVIFDGSVLICMSAVQLITSKNPIVRMSMPPFIVAELYYTYLYCSYAEKLTNMVLRTAYSLLNFLATRK
AlucOR5	MKIVTSDSNVQPVGSTSESKMVERKPQNLTKQLSLSRNPVRTRKERQKRTKTIYDQLDTLFHVGVRCLLLGISPDKFRGNKGYERFLIYFVVILFFFAYSLFQLCAPYFFPGDFLQGMRHFYFGSYCLTFGYQWIYLLRNFDKINQNRVNLKCFNSSRAVTEIAEVILEGKLKPFTRRIVCIAMIFSIASFSHGLGELIQFGEQYFIMGEVKTMLTYFPFPIWGQLIIVLLNTITISLLLAGTVSALIITGLLTLEIETQCAVLCAAMVRGTDDGSQSFTGLIADHVQIIKNARWLIDLMESLNSPAFSCFYFHIAIGLVIMKLVETNGYLFYVSMAFGFMSVILQTGAQGWFSSAITHSLESIAFAAYETNWYERDKNYARDVLMVIQMGQLRFVQKI…
AlucOR4	MVLVPYLKPQKERNAAVDRGYDITGMFYARLAGLYPDLEIGWRYWFFGSYQILVVVAYFYYVLAYVIANVIAIKYMDVELIGSTLCFGSYTYTYALIALTFYIKRSKIDKLLEIIGNELYIYQCPLSQKQLKIRNEETTRAKNFGRYSFFVPCLVALTHMSVVPAIHGFKGEYSSIVNGSAPINKYTPLPVWTPVQATSGMSFFVVFWCQLCPGFVEFLIFHGSCTFFVGVVCVLVSEIKILLESLNSITDRAKYLYHVKGGRGSDIDNLYDDPIYQQCMVDCLKENVKHHIKIKEFRNLFQDIISYCIFFIFGGAAVTISTPPYTILKIMESGDTDKLYSAGVVMMGHTFLSVYLLSRYCKFGQNFESENSKLLEAFYCTPWYNTNMDYRKILIIAMS…
AlucOR3	MSAQTIQSDGGRALLNRDDVKGLNMGLNTFGAKTFWHTLEHFHATGKRHWVMATYIVLLHLVGFTYCLLGFSAVFFIKMDIKRGTAAIMNPICGLQTVFKCWTFSWSTAEYLKLFEILKKDFLTCVPPQKEGGANDVLAKNVVATNEFVKNAMRWNFLTLCMVSTMPYLRSQAFREFFRLGEGAIVPNKICENEYPFEWNSTPIYEIIWIYEQIAVILAIVTSSAYQAILLFLVMALVGHLRVLGYVMENLRASDFRGETYQLMDKSAKANAYQQLIRCIRDHQKINAAGDALAERYNFFLTFHLGTAIIVGIIAIFNCTAADELADKIKFAIMCGYGLLEVAIYCYCGQLLENASEDVLRQVYQCEWEEMEPKFRKAAQLMMVRANNPIALRAGRLYR…
AlucOR2	MLLCWKKKKEKQKPVIKEQHDFANNYRLFKYIGMIQDGSLFSRIRVFLATFLLFYAWFHHLIPLVNSTEEYSFDELMDLIHLEMVYFLWCIVWPSYIIRAPLFTSLASKIQNGLYTYSDPLTLEEKTILSTANDAVVRMTKISVYVYVCGGIGIFLKGMNKERMRKLQLPNIGWFPFAINSLSRYAIGCLCQAIMGINAISIAIGTFMSFAIFLIHYEAQFKLLRTHLKRSFPKNVPLRIAQTDKYKKVSLRRLKDCYRHHLAILGFHQEIMKYYGILLLVFRVAIVMWMCTLAYVTVMVDVNAHNLLKMLSFASTELLYVFLFSFRGQDVTDWNYQWREELYSIQWWEQPKEVKTNIGIMVLGTTQPLLLYGVWKIALYSHEKLSDIGNESFSFFNML…
AlucOR1	MLPGFILLVANCVIMVPYISKWVVGMKNPYTPRGVNLNLPVACWLPFHSHTGFWHVVAVSNQLIAVSCLAVIIITLLFMFLKFSQKVRYELKVLHYGIETLFKRSKRLYFKMYPERKAIRFHWTDPVYQRVVGICLKDSILHHKTIVNILDVFMTMVSIPAALAYVIGTAVIGLSLLSILNALNQGNYPNVILFALLCVGEILNMLVASLIGETLTHETIILREELYFIEWHKLNLSNRKTMLNFQTAITEPLSMKAAGLVDMNMDTFSSIMNSAYSFFNLVNAQ
AlucORCO	MQKVKMHGLVGDLWPNIRLMQLTGHWLLEYHEENGGMLRLLRMAYCWMTTFSIYIQYAFLVCFLILETYNADEMAAVTITTLFFLHSVTKFTYFAFRSSYFYRTLGAWNQVNSHPLFAESNARHRATALSRMRKLLMIIGTVTILAVFGWTTVTFLDEPVWDKTDPDNVNETISVEIPQLMVYAWYPWDARYGMTYFMTFVFQLYWLFITLAHSNLLDVLFCCFVIFACEQLKHLKEILQPLMELSAALDSVVPNSGDLFKAGSAGSDIALIGNGENGNDFDVRGIYSSQRDFSGFQGGVVNGGTVGPNGLTKRQELLVRSAIKYWVERHKHVVKFVSSIGDTYGSALLLHMLTSTVTLTLLAYQATKIEAVDVYAASTIGYLVYTLGQVFVFCIHGNE…
TeleORCO	MQKIKMHGLVGDLWPNIRLMQLTGHWLLEYHEETGGMVRLIRLGYCWITTFLVVLQFAFLACFLILDTYDADQMAAATITTLFFLHSVTKFAYFAIRSKYFYRTLGAWNQVNSHPLFAESNARHRATALSRMRKLLMIIGSITILSVLAWTTVTFLGDPHREITDPENENLTITVEVPQLMVDAWYPWDARYGMPYFLSFIYQLYWLFISLSHANLLDILFCSFVIFACEQLKHLKEILQPLMELSATLDSVVPNSGDLFRASSTGSNLPLISNDNNDFDIRGIYSNRQDFSGFNNGPSTITTNGGGIGPNGLTKKQELLVRSAIKYWVERHKHVVKFVSSIGDAYGSALLLHMLTSTVTLTLLAYQATKIEGVDVYASTVIGYLLYTLGQVFVFCIHG…
ClecORCO	MQKVKMHGLVGDLWPNIRLMQLTGHWLLEYHEENGGIMRLLRLAYCWITTLLILVQFGFLVCFLILETYDADQMAAATITTLFFLHSVTKYLYFALRSKYFYRTLSAWNQVNSHPLFAESNARHRATALSRMRKFLMIIGVGTIFSVLAWTTVTFLDEPYRDITDPDDVNSTITVEVPQLMVDAWYPWDARTGMAYFLTFIYQLYWLIMSLSHANLLDILFCSFVIFSTFSLKHLKEILQPLMELSAALDSVVPNSGDLFRASSTSSNIPLIGNDVNEFDVRGIYSNQRDFSGFQGGAIPTNGGIGPNGLTKKQELLVRSAIKYWVERHKHVVRFVTSIGDCYGSALLLHMLTSTVTLTLLAYQATKIEAVDVYASTVIGYLLYTLGQVFVFCIHGNEL…
ClecOR2	MRQVVPHAAVVPTVSMPQEDEKKSQHPRSDKNVFYEQFKPMFVILILFGRLSITRIKGKYEWRYMSLLMIYCIVNYALQSYIVFLVCKKRFDSLMDAQRNYDELIFAMHILAYLSIHFHLPFTYWAQGPKLAEYINMWKRFQDEWFLTFGDELKLSLKRFIRWFSFSTIPSVVLLLVFEKYSTLHDPWLYLMPYLFTIVSTMLALGLWYCTCIEINRLSKKSTVRLIQHIETKPNAAFLRQWRHLWISLSSLSSWLGSHLSGIIASIFLTFSLTFLLGLYNALSLIIKLDISWKAIGYLSASTLSLCIIYTLCDAGQKGSKEISTYAFQEVLKTKLASNSLDIRYELSLLIKSIEANLPEIELAGFVTMNRSLFISFVSNTITYLIVILQFKFN*
ClecOR3	MYDHGFSPSNPKQAWMDKLEKTVLKRPRKVTESAFYLEMRPLLFLLRLFGKISYMINKEGKMEARLFSISSLSCLAVFAGQTFLVARNIVTLVEVLKEEENFGRFVQGFLILTFMAFHFFLPFSLYLESGKICHFFNEWAVFQDLMEKTTGHKFSTNYDKWLRACLFMCPLGVIIIVLYERNILYNSVWYQLIFYAILLMIFQISLYLWIFSLIEIGYAAQVVQKELKKTTVESCTGLNIYNYRLIWLKLSKLLEIVGDAVALTMIAMTTVNHTCFIISAYMLISSFMHSLYDSIPFLTIMVITGLMITQTFEPGEFVSRKLGKQIADTLMETDISKVDSDCLKELNLFTQAVSGSNNVVTFGGFANVNRSALAGIVGSTVTYLIVLVQFNQSPES*
ClecOR4	MASKRKHTDKPNDPFYLEIRPLLVVLRAFARLAFGIKDGRLVSFPRSCVSLIWFVLYGAHFYLAVDVFLIAFRRLKTETSFFLTIIMMISLILTSVHFYLPLSVVLESGKICSYVNSWADFQDLFFLVTGTRFRPKYRKLLNVCLFLTPLHQIGVLWLQQKIQYFEQWYHMSLFFSILLIANMNLLFWIISFLEMAHAANLIKEIIEKYNFQSKSVAKLTVLWISLVKLIGRLSDSMYITMLVFITVVHSCGVTSAYAVISSINSGSVEDVFIFLMLLLLSCVLILAVIEPVHLTKIKVHDEIYREIIKIDTKKIDPTISKEFERFGEVVQKMNLKVTLGGFITIHRNLMTSMIGTAVTHLVVLVQFSTRQENSSS*
ClecOR5	MTFLQHLYFQKSNNAFYLEVRPILLLFRIFARMTYDIKDGTLICRPRLIASLAWFILYGAQFYVTIDLLMGLTWHLKQEKNFITSIVMTVTLVFILMHLFLPISLILESDHICSYVNRWADLQVQFYKATGKKFIPKYRKLLYVLLVITPFHEMLAIWISQSVLYYDRWYHLVLYFSTFFVCQLNTLFWAISFFEMAHIASEIKEGLRTNFRSFGGYSNIANLRSLWVSLVDLCADLGRALWRTMIILMIVNFGSSVASVYAIISHFISGSPGIWTFVMVLFCNGTAILLMVEPVHMAMLKAGHGVYQELLEFNVTKLGGTSFVQVDKFLQVVKGINPRVTLGGFFTIDRSLLTTIAGASVTYLIVLIQFRIPSENM*
ClecOR16	MEEVMSKSGLNMTLSYFSGFRGPLDIRFKEKWYSALYRLFSFYTDFLIIANTITIGVHFLSPSTPLAERCACGFPMLTSLHSSLRTFYFTFNRPRFAKLMTDYEKAFKGDPTEERLNAEIKSGADLFRPFPRILLTFMVAPMIPWCFIPLVSEFLGLPRVLTIPAWFPMDLTQRTFFSTFSFAVATMIQTLGATWVPMRVIAFDDVFYCYATRQLALFRHLSRNFEEIFESSHVSPQGFVTYTFSSGRVATKEEVKKEVSRKLRQWIIYHQKTIKLMKELQSLYSPALFVQFGLLCLILCFNAFYVALADVGLIQVIFCAFFVLGNAMELLVTCRIGDYIVIQSNKLTDGIAGKDYYLMAKPELAYLRMIMTRCQVPLSMSALGVFPLNTDTFQSIMVS…
ClecOR17	MVGRRDLLDIERVLIVSGHIQTFKRCRVFWKLVQQLRAIYIPLLEPLALYAVYLGGIEGLYKYAFFSIAGILMSQHALYFLTREKEVLDVIKDFKDLFARRNKTWHLEIFNKESKPLWRVVNLYLITCVIFIFFHSFMPFLFDFYLALFTEARPFSLPTPADPYIGENPHRSLSYYLTYFAGSVWSGFLTWHSTGTECMCFVFSTYLNIELKIINKNIETLGECFQNKNFDHKAKLRQIIREHQDILKLRGKVNNLLGAPLVFQNVISTLTITLLVFTATVQIKVRNYPVAFGAMFPFNCFVWIIFVICFLGESLQENSLNLSESLYKLPWYEMDVETRKILLMMIRQTSKPMVYDYKNSSAITLVTFQKMVNESYSYLMVLQSLQ*
ClecOR18	MNENMKDFDMIRKIMVWAGQWQEFSTYPRLKIFLQKFRVTYLMVLSPLPLTSMFLSGFMDSLSKYALFAVGATLIDPMAYSFFFEWDLAKKVYTRLRAIVARRDSEEHIKRFKTKSRPIWIVVAVYALFTFLFVFFYEIMPYFYDAYLFLFTGSDKPFMTPIPNQGFMDKEPKRTFYYYCSNVFTTLWCMDLAMIVFGFDSLTYLVVIYTCIEVEIISERVKSWGEKGADPAELREIIEEHNEVLRLTDDMIELLGGPMASQNTVGSLAITIFAYTVLVKYETDLFLVIVNGLSVGLTFLVIATANYVGDRLEDEGVRFFQSLYDTPWYNMPQKERKAIRIMMCQAVKPLVITYKGWSPLNFVTLMDVVNASYSYFMVLKSMN*
ClecOR19	MNENLKKLEVIRFIMKLSGQWQEFDSFSTVKVFLQRFRLWYMIAVTPLTFISLFLSGFKESLSKYSLFSVSAAFIGPMAYAQLDWGKSKSVYDKLKEMLARRDRQEEIDFIKERTRLIWFCVKIFGTCSTCFITTFDILPYFYDFYLYTAGVEKPFMVPLPNTGYLGENPKRSFYYYFVNVVTSLWCAKISVVAFGYESLGYLSISYACAELEIISMRIKKWGELRKESGIELRDIIDEHRQILRLAHELKELFGMAMASQNVVGALSLTLYAYTIMVELGEDVLQVVVNAFCLVIVTALISAANFMGQNLQDKSMELFKSLCDVPWEEMEPAVRKDLNMMIRQAKRPMVVDYRGRSPLNLVTLMGIFNASYSYFMMLKSMY*
ClecOR20	MIFKPELSSIVSLMKLASIRNDKSDKPIIRFLIMFRHIFEVVLTIGTAISCYVAGWKNNIGLVMFYSIIGTIACVQSIYFLYNYETGKLIFHDLKMLMKIQELDRTQDMLHNETDFTWKWIQMYSFNLIAFMILYSSSPILVEFILFILKIEVAPFLPPLPLNGFIVGTERHTILYFCVCFASIYWSVSGMLAAIGNQSVPAIYLSYHSLGITVLLEKMKKLKRKIDLRSMHFRDTVDEKVAVRELIHLIQEHKLLLRLTHNINLYCGFPLAVQNIMISGCVCLLAYAFLTEINTDISAMLVNAFCLVLMFLIAGIPCILGQRVETLSYQLCDGLYDLPWYKQSPHLRKYLNMALRQANKGMKIHYHGRSPLNHNTLINILNTSYSYFMVLQSSL
ClecOR21	MIFKEDLSSVMTIMRLAGMRNDSSDRLIIRYLILFRHLMETLGTIGTIISCYVAGLKKSLGIVMFFSVIGTITNVQSIYTFFYYETGLSVLHDLQELMKKQELNRPASMLHEVTNFTWKWIQIYSFNMISFMIFYSSLPIVVDFFFFILEIEMTPYLPGKPFEGFISITEMHSLEYFSLCLTSIIWTSSSIFSSMGHQILILIFSMYHMLCITVLLERMKKLGRTINDRSVHERDTAEEKMAEKELIEIIQEHNQLLRIGKNINLYFGFPFAMQNTMASGCVCLLMYASVMEINTDISAMLVNAFCLVLMFLIAGIPCILGQRVETLSYQLCDGLYDLPWYKQSPHLRKYLNMALRQANKGMKIHYHGRSPLNHNTLINILNTSYSYFMVLQSSL
ClecOR22	MAQLFDDGFFSEQEKLFYMTGFSMRSKSRNFQAWLKTFVSMLVVCITPVQLLLEAVFSEGLIYSTESLVTAIIIFNSATKIISIFIKEDLIISTYRLVNDRVVKEKSVKWKNAILTESRQQVEKIQKFFLVNFGVCVFAALLNSAITRYFNPEGGLPLRQWFPFDTSTSTGFIAGFCYQIFTTLYGVIIFTFNYMTFCGLVLHTSALMKILEIDLVNLVKDCKVDDIQRPLTDPKQGFFIPFLLCTTIVPFAICWCGELLKTNSLQLSTALYESHWEDMVPKVRSDMLFVLRQTSKPLVLSARDTFPMDMQTFLKTLQTAYSYLAMLRTVDN*
ClecOR23	MKSECMKFTRLLLQISGFIPINNSYGYSFSFKLISLNGKVAMLVYSFISFMFVVQSDLTESFLAMTIFCMSVQLVLKAYMTSKNNFFKMLDEADQLLENVLTDQKAYDIFEPMFTFIPLHFLQIVIDYFSDRPLKNPYQLWSPFSSVLLSYFFQSYILLMAGIIETSYLDSIASVSLHITGCLKILSHRLSNQSMFVSKKVERESIKIHSDVIRLVASMNKNYGAMLTIEILFASVQACLAGYQIMVGLENLHSNLLVFFITFIFVWLLPSMICFCGQEIETESENIHRLLHYNSWFQRSPENRKTVFFQMLMMSKPLKLHFRNFIVFNVAQLAGVLQSAYTVMTMMRLFFN*
ClecOR24	MQSKCIKFARLGLQLAGIIPMKNSYNHFFSFKLLSFNGKLTMLVCGIISFMFAIQSELTKSFTAWAIFSVSVQLVLKQYTTHKNDFAKMLDDADRLLESVLTDQKAREIFEPMDSIRIKFCKVFVYSLLCYMPLNFFSNVLDYFSGRPLRNPFQLWTPFSSILLSFVFHSYILSMAIITESSYLNSIASVSLHVVSCLKILSHRLSKQPQFISKKVERETIKIHSDVIQLVALMNKNYGAMITLEILSASLQACFTGYQILVGLENLDSNLLVFFVVFIFIWELPFIICYCGQEIETESETILRALYQNLWHQRSPENRKTVFFQMLMMSKPLKLHFRNFIVFNFAQLGGVLQSAYTAMAMMRLLFI*
ClecOR25	MGKEKSSILLLKNLLTGIGVLPLTDGHSKWIDRVWTLLCFCCGSFLLMSSFQFMIEVPIPIIDKLETLLYITASIHIVSNQAILILKSKAVKILIEDIENLYNILYENENNASILNKWSNRGKRQAYFFISTYIVYTCCNCLMSILHLLIFNVYKSPYSIGTLFVPKDLKALAMVFQVFTMFFGTLIMSIHMSFICIIGTSIAGGMEVLKKELQARSTTDNRDFHLFSYKLHSQIINLTARFNKIYGFPLAILTAFCSIQCCLTTYPLARANVRAQDFVLFCTTNVFPVAICETGNAVFTESNNVFLATYDNYWYNESPKSRKELSIMMLVARRPLHLHFRHVVRFTYETYLSILQTSYSYMAVLRTMERS*
ClecOR26	NPLAVYCYVSAITFYLFPSIIGSFCHVFSDDTSAMRVEAFQITCSVLNILFRHLNVLLRIRFVMRMVEELDEMWAEMIGENIIPDEFVKVDARLKRFMVSNLVFYLAPMTLIVAEWLRINYGLSAEEIRWLYPISTPFPNEWVYSVFLAQLLVSLVVLMSDAGSINILYGATLYIGHFLNCLQEMVKTRENFDERIFKFHIKILRQVSYYNNFFSASCFFVVLVNGFEVSVRIYRAMTNEGNDFLQNAIFSLVLLFPPFVISYCGSHLWSQNEILFLQTYQNEWYVQTIKRKKELWFLMKIASRPVTFHFHDLCTFGMPQFTSFCQGILSYIALLKFFLNER*
ClecOR27	MRAPSEYFYFLAMRLAGMIVDPSKKHSKFVYLYVVYQTFFTSAYFFLSLFYLLSDRPLIDKLAASQFCICMVHIVTRHFNTLLRAKTVDKIVKRLDAIWKEGAAENIMEKEYEEQDYMIRKYTVFYFVIFVGLCPLVIIECLLNNWNQEVWILPLPAYAPFPYSWYWSNFSFQITSFYCGLVSTCVSVNILFLITTYSAFNLKYLQQLLIQKDMKKLGNRPYILYQEILKHNREINNYLSTVYFMEMVINGIEVAARVVAFFLDLKKGDFSNFLSFVILAIITLITPYTLTWGGNIIKTENEKLFRAIYESSWYKNDVSTRKKLLIFMTMAARPMQLHFRFVLKFELEQFTTFMQGVYSYIMLLQHFGTA*
ClecOR28	MKFGRYYIERPSNTIYHLYELGGMMVSPGSKHPYLVKFNIVFVGLGMFYFLTTQLLTLYTKIGDQLVIMQFTISTCQIMFKHCMIFVRKKQIVDFISDLDVMWEKVEADDVHKKLFNETIKGRVRYANTFMLMCFCVQPYNVLFWLLTIMTKPREEWEDWIVWWNLVDAEHFWLRFIVQIYCFEAVMISEGVTGSMVTYLCAHISGYTRVLRHMLESRLPDNKSQYKETYIFHQKIIKLVRKLNSIYSVSYFVEIVTSSLTVAFRSFFMVKLVATNGIGGSFAAELLLTILEFFAPYTISMSCELIKSEGEEIIKSAYHNSWYEEDPSTEKDLLILSAFATRPLLVRYKTAFEFSMEKFSTFVQATYSYIAMLKNMNF*
ClecOR29	MTELKKPSEFVFRILGISGMMVPPGAKFPKIFSIYVLVQCVNTFLFILTNFVSLTSKNIGLYEKLECFQYGISTCHILSKHMNIVLQRKRTIKFFTLIDDMWSEFAHDPKYTHLFVKAHKISVRMVIAMILFYDGLIPMNFVLWLIKNFLMSPDVKTVPLALWVFFDWKKHIFLGTFYQLTIFGSALLSIAISIALVRIIAEQGSVQMQILHMMLESRSPEDDKESNKKIYKLHQKIIIFVKEFNSFFSAHYCFEMVLSSMQIAARGYAAVSGLKEGNIMILASYLLIALTVIPPFVICYSGNLIKTQGEKIYRTAYRNQWYYEKTDSRKDLLIMMTTATYPVHLHYRYFVTFSMEQFTTLMQATYSYLTMIQHFDI*
ClecOR30	MSKVTIDVRYFKVIGLWQYLVPESGTNYMVILNLILGILFTIQITIQMWNNILAGYEFSTFTEKFSVNLTCFESAIKMLYYCSQKTSLKFLIKSFNSNFLLCSKHNEEATERVMSKCADFVNRSTKSFMYMIFSTVTVWNALPILKCISGDCGSWQIMPSWYPFDTTYFPVNGLIYIFEFYVMVFCAALLYNVNCLFSALALSIAAQFDLLVTSLSSIPQNAERLAKKESKEEIMSLLLRDCLMDHQNLLRLTKELERMYNPMFLFQMLTSTFTICLVLVQLNEYLGASDQLSIPLACKFIMYLVFGSAELFIYSWGGQIIYDKTSNVHRSLYETGWDQASVKFRKCVLFAMTRSYRPDSLTAGKFYTVDLNSFTQTIKASYSYFTVLRGSDSKKH*
ClecOR31	MERLEESDLVDGLSVNYMKYSGLWTIINEYRETGRKNAMLKIGVFITMIFLCPFITFSLSSFFVIEVDFQAATMFVLNPCSCIQSVLKVLVFWFGLESQCQILNMMRKDFLNCIPKDKEEEANEIMKNIAHRSNYFCVAGITANTACVLVWNFIPVLRSQYFREELNIKLDNMETNSPNKILGGWYPFNYTVTPWSEGVYVFEFIVCAWAGFVISLHECILIQLVMLLWGHLKVVSFVLSNIRRSDFLVKKRFSAIHSFKNYEDDSINSSEAVSKRMNDHLLICLKDHQHLMKVGDQIRDLYNFLITAQLGTGLLIMIITVFHFQYYGTKDALFTVKFVVYLGYCMVENVLYCYCGAYLEAASEEVGMGFYSGEWYKGDVNYRKIGQMLMVRSLRPVSL…
ClecOR32	MEPLEESDLVEGLSVNYMKYSGLWKIINDYRVTGKKNILLKIGLLISFLFPGHYVMFSLSSIFFSEVDFQAATMFVLNPCSGLQSVLKVLVFWFGLHSQCQILNMMKKDFLRCIPKDKAEEAKEIMKKIAIRSNYFCIAGISANAICVLVWNFIPILRSQYFREELNIKLDNMETNTPNKILGGGYPFNYTITPWSECVYVFEFIVCAWAGFVISLHECILIQLVMLLWGHIQVINFVLSNIRRSDFLVKRNLPTRLSKIKEDDINSSEAVNKRMNDHLLNCVKDHQLTMKVGDQIRDLYNFLITAQLGTGLLIMIISVFHFQYYGTKDALFTVKFVVYLGYCMVENVLYCYCGAYLEAASEEVGMGFYSGEWYKGDANFRKIGQMLMVRSLRPVSLIA…
ClecOR33	MMLTTKEQIVPKCFRVQVICSQLVLMWPINVANIFLKLLVWMYFGIIVVSLALAMVGLLLKVLSSKDLLDRSEAIDILTLVTSALYKLLFFSVKHEKFRWVVMKCSKFEKLLPDGWNSMTSKLSILHSMSAFAIMSFWSLCPILNWLLGVISWESLSLPINSLAPKFDGFMFGLIYLWGCISLLSSAQIYMAADIFCFSSIHMVNGAMETLKLRLEDMRKISAKDDKDGKEPRHEFLKSWINDHIEIMDYIHQVDLMMRSMIVADVLHAIISLSFAMLQSSESQNFLDWVKGSLFIIVCFVHQYLNSHFGQKLIDQQEAIRKSVSEIPWDEGSVPLMKTVLIIANGTLKPVRLSAWRMYFLQYATFVEFVKTMVSWFMVLRQLNDEK*
ClecOR34	MVSEGIVKAKYCYYSALGITGLASYLDGNKPKLTTRIWTCFFIYVILPSVTTAHFYTSLFSETSYAQKFLAMSLGLDQFQIMTKSIFFHNYMSKMSGLVLDFSSFACVGHDWERTGTILGKRTDEILRLQKFYNMVLLVCFCSWSLVPIISSPSALFLSRNLEEMSKVLPIVYPFDVNSFPWVQIIYVYEVVSTMGILIHFAGSNLFFVCCVITLCGMLELLKMSFETSNNYEDFKQFIKDHQRLLCMCKEIKHILSPILALQLLISALTICFAIYEITMVNETSKSGMDQVILYSRKTTYTMVIFIELLFYCWLSTELQQATLTIRDGVYNSSWYLDKQPKYKDIVIINARSLRPVSLTALMMNNLHLGTSIEVLRAAYSYYTMLKQMNR*
ClecOR35	MTKLALSQIGDIHYYILRNLKLDIFLNDKEDTVITKLQKYVLTLFIIGIVQTFAILQVTSYDPADPFEEKAMHWGISLNMTCFLIKFIRIISNIGLFKSLFIDFERMNCNQHRSDYAREVLTKAIDFCKKIDKNCMYFMVFIYLVWFLVPALLSPFVVLVNQEEMTYDSITSHLPTTFSFKVNSPFREIRYVFESVNCFVATALLQSANLSFFVIVYMLQTQFMVLCDSVKRRHDLTSNDDKEPLALKKLIKDHVTLLRISKNLKEFLSPLLMVQLLDSVFLIGCIGSSLTSTPTTKDASLIDVLANFVQFASFLCLALAELFMYCWLSHITNESNQKLASAIFETSDWYLNLGGKRDLVLTILLSQRDTSFRAFDMVGINLFRFLDVVRLSYSYFTML…
ClecOR36	MMRPWRRADLSKVWTWPHIFWFNIFAWWAEDIQNKTLQRIAIKFRLFLLIFNVWFLFSLMTNNFVEISNNGLTNSLFTIFASLPAVLAFTKLAYLIKYRRELRKAIDDLDDLLLETINKGVDPVLEVKLRKHYARCWLLFYFLLIVGSMITLHWLMRPIMLALGGIKTSIVVTYPNMIETWTQVFVTYVIHAINVATDGHALYMFDNFYFCMAENILIQFTILRHNLHNMNITTGKPGNITIKTCAEHHNKILRICETLRVSSVSAILFQCFHTVLLLCSGVFELTLGKKNLQVFMNLAEITLIIVFILYCYCWYSNEITFQCRDLLHSLYMTDWLNGTVEDRRIVVTMMSMTMHPVVFGGIVKINLNTFLDVLKTTFSYYNFLTAVDLQ*
ClecOR37	MTYWKELRWLNAFGWWPLYEKNPKIRKLYRYYGYALFISDFIQVGPEYIALFVRMREGSFRKTILNLNTTLAGTTCAIKLLHLFHQENRIANIIDEIDELEDRGSSEIGDKIEHIKKPIERRKSITWNIVQTFVVFSLHWLVTPILMGLQGVKRPIIDSWTPWTQETWSGWALTLGFQSVHVFTAIVGLFMTNCLYISILESILLNFNILHQMLLDLDFEKNTSKFGDYITYHQNLLRVTKEVNNIFGRVQQMQCITVIAISCFSVIEINENTPVNRLLNLIELVSSVLFFFLLDCYLSQSVSEASSNVARCAYQNNWYLASFKDRKALKLMHERSKKPQMFGGFIIIELNTFITVIKSAFSYYNFLKAIDMKT*
ClecOR38	MLLLLIERTSLVLAAVPLQLVPRCRYSGVQMGTVKTELTFEDLTGFRALPIQMSLVSNSINYTVLFIDLLQKITLLRFNTSAIETLGNWAKKVKIRIGNNETNLIKVVKIVNKFHSVTSNIAALFWAFYPLITGKTILPLKYPFLSQFLSTISFPVEFIIYTGFSTVISYGAAVFLYALALFSTEIHRLADDWASLTYDSKQPQLYRQQFKLLVERHVELLKVLVNIKKLHEGAFGFQIIITMLLIFTGTFGIIKLDDDAVTLIIITTPFGVLTTSEFFLMCWIGVQITDGFSSIHQKLYFTNWYDTPANDKLSLQIVMEFSKKPIILTGVKIYTASLTTFGNVMKETFSLYTVLKALMG*
ClecOR39	MWKVASYIANDDRKTGFTYHKAAFKLLGLFYWGEKNWFQVFYEWYPIVNLGIGATLLTIDVIQKGQSASSKAFIELVKGSVLVFTLYFAMVKLVLFQLYSKEIRQAIDFLESLPKIGGTDTSANTRKTLVRYSVLLLTTGCGWAFFNSIHTGSPYVCYWPFETPRPKIFFLLLAFVQKLMVIGYCVSAHSAVDTSFPMLVTYMAYQGTRLVSLLETLGKNKYEYKKFKEGVNIHINILKSMGYVQSAFRVLFMCQVTYTIVHACVIAFSALKVGNIMFVITSLVPILCSAYVQLFIYCQAGERMTDIMDKIAVAVCDNTWYESDLKIKKSMVLMLQMANKSVTMNKLGVYTASLKTYLNSVQESFSCFLALKTVSSKL*
ClecOR40	MDFIFKTSNRLIVALSCEGRLRIFTLQRVLLKILGFEWWKEGLNFPLPDFMKKWGYQAFWVILMICDIVLTLKASVWMAIDNDLKYTIKMNGIIVMMPFVGSLIKIFYLRYMQKEFIELIETCESIGHLDMEEESIQSGLRLNFVYINMLLSTVGIWAIFFTIINHEIPVATDFPWSQDVALGQFFSLMIDFYCGINCCLAHSLLDTIFPVSAIVIIAHLATLRKKLAKLGCNKYQDEVLLNESIELHNKLLSMSELLQICYNEVSVAQSLYSVMHSCVLIFAVEQVPNKFSVLVSSFPLLLCSYAQLWMYCSFGQMMTDEFDKISFALYNNRWYACSISSRKALVTFAQACQKKVGLKGVGNINASYSNFLHKIQDSVSYYLILKTVTSESDGEKN*
ClecOR41	MNNVIDPILKYSVAIAGDKKLEVYTLYFSFLNFLGFDWKQGGINVPVPAWVKFKVYPASYPIMMLIVSFLIIKLNVEVEPKTEFEMIKMINGFIVSMTFIAAFAKLLYLRIIKNDILELLNMSVTVGPISAEKPVVKDTIRSCVLYFILLNANVGTWTVGYLWLHNDLPFAAAFPWDESTVVGFSLSFNVDVLCAFYCSIGHTVLDISFPLVVSTMCWHIQRLEKLLSTLGKDYFIDRMILDKAVDLHVRLLRQVIVCYNQLIVAQSVYTVLHSCILIYAVVKVSNKVEAALSSVPMLSASYAQLYMYCSYGQLLTDKTHTLSFAAYNNEWYRCPPKLRKSLVLFLEATKRAVHLKGFGNIQASLANYLHSLQDSVSYFLVLKTLTSDENA*
ClecOR42	MEEQAHENVFFRHVDLLRILGVTIPAKGTSRGLLMKIWYIFVIAVLFINAALQGRSMFLPTSLSMKSITLVFFLVNLASALKLLLVQLNAEMLAKLFQELDTPGASDSTPMLKTVHTISRTYVVCLFALLMAWVAYPWMTGDLELPIPYWFPFNLDTFFKFSCAYSFASFVFFIICYTQDAVDTLLLLIAGQICRRLGAIRVALLSIGTEEPLRKRGWKRPKAMEDFMGLSILRMAALSRDETLLKEVIREHVDIIRLVRTFDIVLDDIFLAQVMQSTLVSTMTFFAVSKVDDPIKDMPKFMFILGATYLQFFMYCWLGEEISDHSDELHRTLYLSEWYKCREKIMKSLVIMETFTKAHFKLEGGHLFNIDLATFLMVLRESFSYFMVLRTVTRSVG*
ClecOR43	MESTEIDAFKILKRYLKAYGVNKTSGNNVLKKIHFFLVVLICLIGLFGFGRGAIYANQELSDRCITIVTTFCSGFAAVKITYLYWNIDDLNLLMDSLKSYNPDTFVTKAIRKLLTSYSLMMSGMILLWVCTPLVFLQRRIPMYFSAPWESESWLGFITEYILASVCLLCEAHIHTMMDSFVMLLSLQISHRLYLLRLSLEHIGSSGKSEMEGMEGTIYKSNPLTTIQLCVDEHVFIRRLMKAYEGLVSVVFLFQVLISTVIIGIVIFSVTTLEKTVNEIIKYVPIFGLVYSQIFLYCWSGENISTHYNNLSFACYSSKWYQLPVTHRKQILKFQLNSTKPVKIRGWYITDMALSTFLASVQQSCSYFMILYQFVLEK*
ClecOR44	MALDVYFKHRTVLRLLGISLPGECGKAAKFWFAGVFLTLSLLFPTLVLCFLLGAMFYTEYSFTSRIYSITGVISCTSAFFKLQILFWNRKNIKNLMDATNGYKADTPTGKLTYRLTILYELLTLTYRSFSVIEILIKRPKKLVMPFWTPFVVPDTPSASVSMLIFFQTSMMLKTLSNFPVDTLFLHITNQICHKLYILKNTMELLGHIGEERKGKLEINNVLSVQGEVDDEKLLKTCIQEFNTILGHIQILSKMLDEFFVPLAFNSFTSLLFAFFLVSQSDDMVKEGFKIAPWTSVIFAQIYIACWAGELIKKRCGDIHFAAYNNAWYNTNLSVRKSLALVQTFTVKPVVLRGAYVFELSLHTYETVVREVFSSFTVLYQLFNQK*
ClecOR45	MDVFRRQRVALSILGVYVPGTYKFRYVGLAIEYFYFYVVFIYINIMCYVYFDASIRFIHIDFMNRIVSGATAISSVAALAKILMLHRYLLRDILDSLCNFEADTPRGKTVAKVIRGYEIAVLSIILSSNAKLGIDFKRPSPYFAQYADGGPFIRDYILYLLYGCLVLGVNVFVDTLFLFICSQICHKLHVISTTLTTVGPQAEQTKEESLVPFDESDEKKVTASIQEHIKMLHIIKRVEWLFNEIIFFQAFYTFGSLCLILFASSQTDKLAEDASRLFAMTISLSMELFLFCWAGEMIKSHCSDIHFASYNNGWYRCGKKIKKALMIIAIFASEPVTMKSAKLFHLTLHTYEAVVRETFSYYTLMYQFFNQK*
ClecOR46	MHKEGLGTNYDPSKYSTQLNLYKFYGFAPGNKITDWLRTSIPILIFVFGLVHFPLYVKNRETNGATQTDIIEAFHWSVVYCMIIVCILFMVKYRSVYSEIDRIIKSGVYDYGEDFTEEQQSICEGANKLVLKLGKLLTIAFIATVSTSLTKQTIFRRKPGSWNTLFKGWTPFVINTWPRYLIVFIVHIIMIINTSTSGYLLVLSFLTFGVHLVAQLKSLRIALQEIFLSEKNQSEEQILAKLKKCAAHHAEITRFFNLVQVYSGSVSGVLPIGSVGMICTFLYDMTGENTVEASFMVILPEASLITTYALIGQYITNESENLRTFLYDIDWYAQPVSVQKYLLLMMMSSKKSLDSKGFGVFKYSLEGLTEVMQTTYTFYNALNATR*
ClecOR47	MGKGGSETHSDPSEYTTNFNLHVGYGFAPGNKITDWFITCIPISLLISGLVHFPLYIRNSDTNGASKMDVIEAVHWSVVYTILIVCIFFMVKYSHIYAEIDRMIRSGVYDYGDDFTEEQYSLRDETNRIVIKLRKLLTIAFTISVSSSLTKQTIFRRKPGSWNTPFKGWTPFVIDSWPRFIAVTIYHCTITANTGICAYLFVLCFLTFGIHLGGHLKILRIAIRNVFVQNGQTEQQTLAKLKKCTEHHLQIKRLFHLVQIYSGKSSGILPIGSVGMICTFVYDMTGENSKVDVSVMVLLPEAGIITMYALIGQYITDESEKVWDCFYEIDWYSQPVPVRKHLLMMMVATKKSMDTKGFGVFKYSLEGLKEIMQTTYTFYNTLKATR*
ClecOR48	MDQSEDKKILVKGYKEVYGIFCTLGSVYWNIDVFGAKYHKWLRLYLYVTSISCFFTAYLFCYSTVVSIKRIDLDGIADSVGFVLIFLGLTFVIIDGYVHTKNFDQFFHNVGLGYYKYQGERMKEEEIKKFKEEADNKLLSVIKPFITILYAITFTCAVIQPLIYYLIDRKVDLTITKIIYPPLEIWAMDFPYIIILSSLTTQWKILNDSVSKIPQRALERYTKKFGSPEYQKDIYQDDRYQDCIYDCLIENIKHHQAIVKTRKIISPYLSYIFLIVIWNSSLMLACNGMVLVDAKLDVLFIKYVLIITAEFVHSAFFCSFGHELTVESGKVFHTVYAFPWYRCNTKVRRAQQMFMLNTMKPMVERAAILGIAASMETFNSILSSCYTYINLLRKSA*
ClecOR49	MASIQDKIYEKKVSDKWVNTHYVQEVCRHFLFGYTIYKKKFKQTIPIGCYCLVYNISIAGLISLLLTHTLDGQQLFDTIHYMLYMIVLDAYVYTIFKYRRKMLELNAKLDEWFHYKELEQEALIIREKVEAKASRNVNIYVGIMLSCNFLFCVMPMMKLSFASDRSDMLNFLIYPCYLGFPLDTWWGFALTYAFEIVCSTATFSLYARLTSYGFVTSMHVNYQLKLLRVALQTLEIRSVSIMERLGFSMQSPLWKKRYERTLEEEINTIAIHLQYLHGLSDYIVQILTPATTSTYTGGMWIVCFSGLVMYTAENESMLIGKFFVIFSAELMNVYTFSLTSEYLITSFEETINSIYFCPWYNLPKTCTKTLLNMMTLLMKVPSLRTIVGYKANIVNMGAI…
ClecOR50	MNKKSIDINNSLFDKIVYDVKFASFNIENRRVSLTIIGTYIVFFVVTLIVMGHTCYYYIKDRDYVIIMVHHFVLTIESLIAVTYSYIKRDNVHFLITNAKKSFNYNSPSMVSYMKKIVKDKVPIAKKVHYSIVIFPFYVLINDMLYSSMEKYFWGGEYLLLYPIYTALDLENWFFYCPILVWEMSVIFFVIVVISGIIGLILLVYIHLMIEFSMLEHAIMNMNKIIEEKIEMYSTPKMSEDVKKNIIKKIQKECMDEIARHMDDIIIYFNNAKGYLNFIYSNIVVAGIMITVCTGVICLSENQAVRMKFFGIFVVQNIYLYAVCWIGESIANKSENLRIVLYDIEWWNFPKSCHMSIRLMLVRLMNPFYFYTFLGQKIQLETFMDMVKGSYSYFNMIIQ…
ClecOR51	MERVTMLDPTKNPIKGFKMILTVSSIQIYDKKYALVIPIAWLICSFISLIFFIITIMKIKTADDIFAFVHHFVVYLSFINSVIWSYYKRDNWDRLIDGTHITFEYRSEIMYKKVAEMTKPRKEWLQKILNLSIFFLIFNILNIWLYSFIEKIQGNKPHLILFPVFPPFDMDYLPWQLVVLLWQQQVISAMLFTVYGVLGALTIFYDYISNEISLLKFAMLHIEERAKEMMKTTKMKYQNLTEQELYKKCLIACTNQCAKHHSIIYDYYLNAIQAVRYTYFIVVIVGIVALVCGGATIIFGSMNIKTKFFGMIIATLIFLYLAFWFGNEVRDLSDTIPWIVYDINWLELPKECHSTLRIMMTRSMKPMALTTSLGQNVDLENFMGLVKAAYSYFNMIYQG…
ClecOR52	MPGKKGKTTKREPEKSVQWDVTKCKFYKENFGLFLRYGLLLWINVFHIGAYIIILGTHIPFYLAASWLIFEEEYADFTELLHLTILLLLCFLAVLTIKKEKLEKLIRKFDNGLHDYGDTMDKSCLEEIEKIKSETLSRKRFRCRFMLFGLTMSAQTIIVLRPIFDLISGKFSQPHFKHNVNRYLPIIMWYPLDVSTWTCQIIMFIIEYYLVIQTWLLATASTVTLISISEEICLELSVLKITLKNIVPRAKHAGKGIVTKEILNDCLRRCVIHHCNIIDCFKLFQEFYKWIIWLIITMSTFMLCLGAFLMTMGGMKVVQMVTSISFFVFEIFHLLLYCWYGEEIESLSADLFYKIYESDWIDYKVDFKHYFLLIQKRTLYPLKLSAGGYVYANLHTFSN…
ClecOR53	MAGKEKGEIKEKSKVRHYTQCKFYKENYGRYMSWGMFLPMSRMQRPLYFFIGTIHLPVVFYTCYLILEEEFADFTELIHFGILLILSTTVTSFFNSAQLENLIWYYESGLGDYGDTIDKVSAKEIKKVKSKFLKRKNFHSLFMYYGLYMASCSLGLLRPVYEWLSGKYDNISFKDNVDRMLPLSVWYPLDVTSWPVHIFMTCLEYYIIVQTTFLVIGSSIIYISVSEELCAQIATLKITMKNITRRAKHVGKGVTTKENLRECLRRCVIHHCRIIEWFDMFQKFYSRPLWLIMTILTYMICLCAFITTMKADLTFSNRVTSVAFLVLEVFYLLVYCWYGEEIRSESGDLHFEIYDSDWIDFQVDIKNYLLIIQQRAYHPLKMYGGLISADLNTFSTICN…
ClecOR54	MRLKNEIESLDPKDRAALERGRKENFYFLLHLCGCYLDSFSAYIKMFVFYLFGTAFCLCIIKTILIAKNSNIVLTCEAIHNLFQIGTSFIVFATMRYYKELINSTMITIGKNFHDYKNTLDDETFDVITSIRQEGIRKKKLTAVSFSFLGFGSMVYSFTRPFVDYLLGLPMKQEMDVVNYPMTMWSPYSDDIMISVTFLMQSLIFTFVISVWIGMDMTQICFLLEIITNLKVCIVSLSNFEQRSKHIFTSTMGRAPDLKCKKDREKMTFLIKNSLKSSVQHHHTIIRVFQNIYTVGYIPYLMIFCSTTILLFLTIAIFTSEDLPLTGKLNFVLFALAYCVQFYIYCALGQSITNTSADVGEAIYRGNWTEWSKDTYFYTLMLKHRGLKTLDLSVGGFAK…
ClecOR55	MSIIIGWNDYDVRFECLNVTLLLGCMFSFIILYWIKKDKVFYLYRALGSELHEYDVGGETLEHINRLRAESKIEKQKIPRINFIMCCSVMLLISFRRPLNYLIKGETRHARDGADLPSSHFVGGIPIPYWFYVEPKGNLYYLAAFLEYFNIIYVALLFPIIDGAFVAMSHEICTEFKILHYMLKNLVETAEVQYEKSSPNSSIKDMNKFKIILKSCLRSCLIHHQHIIKVISVIRDVNYMLLVLSGLGIGIFTCLLGVVLTVPGTSEALKASSFILILLELIHVYFYCYYSGQFSDLSVAVGSAIYESNWVKYSSLLKTEMMILVERSKKPITLSAGGFSELNLEMFSGIINSAYTYFNIIKAMS*
ClecOR56	FFENMGSALIITAITIIAFTFLHHKDKFEFIWSALGSKRHQYEVDNETKFYIEKIRQRSSREKKYSPKLFIVLMVSACFVQIFVRYPLDTYLNGYEKYGRFSELLPKYVVGGVPIPFWYYFDTKVSDAAYYIAVGREVVFFVFMTSIVIASDCSFMCVAYEICTEFQILQYVLKNLVEISKLMCKSQGKDSPKYEDISPVLLSLLKSSIRHHQLLLRMGVTLKFIHRPTLIYLLVAISILVGSFGFLLQSSKVALGAQIAGCGTAMAAMFHLLIFCWFSEKMKVCVGHNLFTPSIMDYTAILKKEFVIIQMRSTKPTVLSVSIKSELNLETFAGIMQTAYSYCNLMVSSSEKL*
ClecOR57	MGLLHSKWDEEVGEYNKKVYYNLLWLACIYPKTKGSYLYLTIFQFTFFTLICVPFSILSICTAFMCSEDFIFASEYFLNASFALFTQSIFTFIGIRADANTTIHKIIIKEFPKYKNIDRSVLAKINEVNKEQEIHLKLLVFFMSLAVPNLLFLEPFLEDLYDSKSIKIQNGDERLIMPMWSPDPENLFVHYVIFSIQIFQPCITSIVSLTGIFFFMNLSHSLIEQLRILNWSISNLEKRAKSHYLSVIKNDKNNTKWTYMDSIDLCLNENIAHLNILKRFKKGFQDVTSPTLFCVFTLATFFIAFTGYVILESEGHPGKLTFAVNVIIIEVYSLGFFNTFGQYVIDESEKLRHSVYGVDWYHLDKRCCKKLHILQTMCLEPMVLIVGGLLPLNMASFQK…
ClecOR58	MPFKNYKWNDRDAEVQNYVNRFYKKILWFAGIYPRVDGLYLYLTVFQVVYITIIEWFLLFVMAVSIVYSTGNIIFAMKFIRLGSLCIAMNLYMITAGARRGRLTEMVRLQLDNFFDYEEDIPDDVETIKEGGRKRMKLLLLIPIYGVINSLIKYLIVPIFLSKNNAVKKNDALDNGAVMPTWSPDPNSVLVRVAMLIFIVSFIAHLLFVMVGGFFLVVQLFESLIQQLQFLNLSISRLNERVETHFKKIRKNNENWTIEDSFDHCIKQNIKHHLILHRYRSSLENYISLPLLALFTTSVTIVAANIFLIVTQDDKLILFLSLSTFVSDAYFLISYNLYGQIVVDESEKIQFTIYNLNWFNYTKGQKKMISIMQVMTRKPMHVSLGGLMNMDLVNFLSIT…
ClecOR59	MAFKKYKWGDRDVEVEDYINRKYKKVLWIGALYPRVDGFYFYLTIFHAIFLTVGEWFLISSMAISIFYCTDNMVFAMRFVRLGSLCIAINLCMWGMLMERGRVTEVMRLLIDKYYNYEEDTVPKGLEAIKKERRSRMKYTLMVPVYGLYTGIHIFVLPLFSFQDLKLPEDIFDTKSIFPTWSLDPNSIWARLMFLLFFVSFIAHLLFEATGGFFLLVQLFESLIGQLQVLILSLGRLEERAEAHFNKTRKKDNTWSREDSFSHCLKQNIQHHLLLYEFRESLEKLISNTLISLLFNATAILAANAFLLANQEDHLTRILSVVGLITEGYFIFAYNRYGQLIIDESERLQFAVYNLNWFNLNPTQKKMVSIMQVMTQRKPMRLALAGGLMGLELVNFLQI…
ClecOR60	MGCVSSFYDRLEQDGSEAINAQIQEEFNVLLSLSCFYMKLDKKNRYWQTSLCFAIFFFLTYHLVQFMITAYLAKDQLVTLAFSLSIAITYLFSTLLAVLVISSRRDLNKFIRRCISNFYEYKNEDATDDAERLRSRGKKERIALLIGGPISVGLCILFVLFMTPLVDKYSPVKLSLEDIPKSINVQLPVAVWLPVQVEDTTTIYALSLLQIIAALPIGVTMPAAISTYMFCVQQITIQMELLNDSLVRLETRANRLMKILFPYAKLGHLTKRHPYFQYCVKECLKENVKHHQSILLGFDESFAIINKPLFCCNYLMTLMIAVSLTGTISSSATYGFKVVSALMFIVELAALSIIHFYGQKLMNLSQVLRERLYETNWTSYNSSIRSMLVIMLERTKRPL…
ClecOR61	MGIFDLFSNEGFDEKVEQFSMREYYYLLQISGLVFYSRGRWFWLAVLQFIFFLIMLLAIIITMGYTIYLLKDYQFSLTALLLHIFIGFTLCLAILISVNLNRDQFIAFLTINERGYYNYGNNYVYKKVNMWKKEVQQFDRQLIIFITIYFFFVGTVGIGQPLIDMYQGITLNVSYVNGVYMNLPVPIYIPYKIETYFQTIGFILFEIIEDGLIVVIVCSSIILIIKFTFSVVNQLRILIHYIENIEGRTLHICKSKYPSFKTPNSSRKLYKNPLFLAEYELCLKQNFEHFNVIREAVKILDGIIRWPMFLAILTFSLVLACALLTLIKGDTRIAPQLLSIMLLLMEAIACAKICEGGERISHLSDEVFSSFYKTKWIHCPHRIKTSMLIIQECSKKPLS…
ClecOR62	MMETLEKRFNCYLTDAVEKFIMKEFHYVLQVSAFYLCLRGKWIYFSIFQFILYHFILGTFIIILFYTIVLIKDFQLGIAVQAFHIMGGVSMTVNILLWMNYNRDILSETFTIFHSKFYQYDESFDSKMVEPWLEEVKMVQKNMFLFVSFMLFTIGLQVIVGGPIEDMLQGTVIEETYINDVYMQLPVPLYFPFLITNNTVKYVCLVYEIIIAFIVLSVLGSAVLFIFYATHSNDELFRSFYETKWFYCSKSIKQSMVIIQEKCKTRLTYKAGGLTDINWELFGTVMNTAYSYFNLMRAMKFSTD*
ClecOR63	MEILEKRFNCYLMDEVEKFIMKEFHYVLQVSAFYLYLRGKWIYFSIFQFILYLFILGTFIIIVFYTMVLMKDFQLSIAVQAFHIMGGASMTVNISLWMNYNRDILSETFTIFHSKFYQYDESFDSKMVEPWLEEVQIFQKNMFLYVSFILFAIGLQVIVGGPIEDMLQGTVIEETYIINVYMKLPIPLYFPFLITNNIVKYMCLVYEIIVAFVVLSVLGTAAIFMLYATHSNDELFRSFYETKWLYCSKNIKQSIIIIQEKCKARLTYKAGGLVDINWELFASLMNTVYTYFNLMRAMTDTTN*
RproORCO	MQKVKMHGLVGDLWPNIRLMQMTGHWLLEYHEETGGMVRLMRMAFCWFTTLIVFTQFAFITCFLILETYDADQMAAATITTLFFLHSVTKFMYFALRSKYFYRTLSAWNQMNSHPLFAESNARHRATALARMRKLLMIIGSGTIFSVLAWTTVTFLDDPHRQITDPENANETITVEKPMLMVDAWYPWDAKYGMTYFMSFIYQLYWLFISLSHANLLDILFCSFVLFACEQLKHLKEILQPLMELSAALDSVVPNSGDLFRASSTASNIPLIGNDGNEFDVRGIYSNQRDFSGFQPGIAALPSNGGGVGPNGLTKKQELMVRSAIKYWVERHKHVVKFVTSIGDCYGSALLLHMLTSTVTLTLLAYQATKIEGVDVYASTVIGYLVYTLGQVFVFCIHG…
AlinOR4	MVLVPFFIKPRIGRNAAIDRGYKLTSMFYARLAGLYPDLEAGWRYWFFGTYLNSVYVAYAYYVLAYVIANIIAVKYKDFELIGSTFCFGSYTYVYSLITIMFLIKRKKIDRLLEIVGNDVYKYRRPPTKEETLIKETETMKVIVYGRYTFFIPCSVALMQMAVVPAYHGLRGEYTSIVNGSTPINKYSPLPVWTPVEATTGLSFFVLYWCQLCPGFVEFLIFHGSCTFYIGGSCALVSNLKLLHHSLGRLVDRAEYLYDIKNGKYDHQSKIPLNTELFDECMVECLKENVQHHIEIIKFHHLFQDIVGYSNLFIFSGAAVTISTPPFTIIKIAELEDRHQLLCAGIVMIGHAFLSLFLLAQYCKYGQSIEDESEKILESYYFTPWFKARKSFRQLLVVA…
AlinOR6	MFIFIREKELERNPDNMKGRELLEARFAIFSGIYPDFYGWRYYYFVLFLIFIHPGLYCYFLYAYGISFYYGMLYADVELLGQVLCLGTITVIYCIVSIYYIARKTDMDDLITMVGKGFLNYSRGLTEQEKTIIDRMEKVTHRYAFGSTAMLMAISLVHMGLLPMIRGLKGQFTSITNETAPINKFTPLPVWMPFECNSTRSFVLTFIWQIIPGCMEYAIINACCILYVGLAQQLSGNLEILANSIRDIHTRALIMFENDGGILSKITGELYENSHFLKCINACLNENIEHHVKLIEFFNKFQGVAGFSMLAIFSGTGLIISTAAYSLLLIAQTGGDSELLITNAFVWTFYLFVYTFLLTVYCYYGQEVTDKNDALLPALYETPWLEADLPFRRSLLISM…
AlinOR46	MIPFIFKKKDSNDPIVMRGYELTYSYAMRLGGLYPDFRGFRYYIFGFHLNCIHVAYLWFILAYIISAYYGFVYNDMELVSYNICYGLLTIIFFLVGHSVMYKRNHLDRLFETVGKGFFTYEKPLDADEQAIVDECDMKCKKTAKRNILLTMVLTTWTCVVPPLPKALKGEYSSVVAGGVPINKHLPLPVWSPYPIDTPLTYWSMYALEFTAGVTEAFIIATTCTLFCNLCTIVSRELKLLRLALRRTRSRANYTFKMRGYSFLPGSNYAKYKLFQQCMVHCIEECIKHHIALKKFQEEFQGFMGFPIFAIFSGTALTISSPMFMLLTMTEAEDSFLVLMKILQYSSIIFSFTCFLSSYCLFGQMITNESSLVHFAFYETPWIDGDLDFRRKVIMGMIHS…
AlinOrco	MQKVKMHGLVGDLWPNIRLMQLTGHWLLEYHEETGGMARLIRIAYCWMTTFVVYLQYAFLVCFLILETYNSDEMAAVTITTLFFLHSVTKFTYFAIRSKYFYRTLSAWNQVNSHPLFAESNARHRAAALSRMRKLLMIIGVVTILAVFGWTTVTFLDDPVWDKTDPDNVNETISVEIPQLMVYAWYPWDAKTGMTYFMTFALQLYWLFITLAHSNLLDVLFCCFVIFSCEQLKHLKEILQPLMELSAALDSVVPNSGDLFKSGSAGSNIALISNGDGGNDFDVRGIYSSQRDFSGFQGGMTNGTTVGPNGLTKRQELLVRSAIKYWVERHRHVVKFVTSIGDTYGTALLLHMLTSTVTLTLLAYQATKIEGVDVYASTTIGYLVYTLGQVFVFCIHGNE…
AsutOR4	MVLVPFFIKPQIGRNAAIDRGYKLTSMFYARLAGLYPDLEAGWRYWFFGTYLNFVYVAYVYYVSAYMIANVIAVKYKDFELIGSTFCFGSYTYVYALITIMFLIKRQKIGRLLEIVGNDVYKYRRPPTKEEILIKETESMKAIVYGRYTFYIPCSVALMQMAVVPAIHGLRGEYTSIVNGSTPIDKYSPLPVWTPVEATTGLSFFVLYWCQLCPGFVEFLIFHGSCTFYIGVTCALVSNLKLLHHSLGRIVDRAEYLYDIKNGKYDHQRKIPLNTELFDECMVECLKENVQHHVEIIKFHHLFQDIVGYSNLFIFSGAAVTISTPPFTIIKIAELGDRHQLLTAGIVMIGHAFLSLFLLAQYCKYGQSIEDESEKILESYYFTPWFKASKSFRQVLVVA…
AsutOR6	MFIFIREKETERNPDNMKGRKLLEARFAVFSGIYPDFYGWQYYYFAFFLIVIHPGLYTYYLYAYGKSFYYGMVYADIELVGQVLCLGTITVIYCIVSIYYIARKTDMDDLITMVGKGFINYNRGVTEQEQSIIDEMEKVTHRYAFGSTVMLTTISLVHMGLLPVIRGLKGQFTSVTNETAPINKYTPLPVWMPYDCNSVGIFIFTFIFQMVPGCMEYAIINACCILYVGLAQQLSGNLKILANSIRDIHTRALIMFDNEGGTVSKNTSELYANAHFLKCMNACLNENMEHHVKLIEFFNKFQGVAGFSMLAIFSGTGLIISTAAYSLLLIAQTGGDKELLITNIFVWTFYLLVYTFLLMVYCYYGQEVTDKNDEILPALYETPWLEADLPFRRSVLISM…
AsutOR46	MIPFIFKKKDSNDPAVMRGYELTYSYAMRLGGLYPDFRGFRYYIFGFHLNCIHVAYLWFILAYIISAYYGFVYNDMELVSYNICYGLLTIIFFLVGHSVMYKRNHLDRLFETVGKGFFTYEKPLDADEQAIVDECDMKCKKTAKRNILLTMVLTTWTCVVPPLPKALKGEYSSVVAGGVPINKHLPLPVWSPYPIDTPLTYWSMYALEFTAGITEAFIIATTCTLFCNLCTIVSRELKLLRLALRRTRSRANYTFKMRGYSYLAGSNYAKYKLFQQCMVHCIEECIKHHIALKKFQEEFQGFMGFPIFAIFSGTALTISSPMFMLLTMTEAEDSFLVLMKILQYSSIIFSFTCFLSSYCLFGQMITNESSLVHFAFYETPWIDGDLDFRRKVIMGMIHS…
AsutOrco	MQKVKMHGLVGDLWPNIRLMQLTGHWLLEYHEETGGMARLIRIAYCWMTTFIVYLQYAFLVCFLILETYNSDEMAAVTITTLFFLHSVTKFTYFAIRSKYFYRTLSAWNQVNSHPLFAESNARHRAAALSRMRKLLMIIGVVTILAVFGWTTVTFLDDPVWDKTDPDNVNETISVEIPQLMVYAWYPWDAKTGMTYFMTFALQLYWLFITLAHSNLLDVLFCCFVIFSCEQLKHLKEILQPLMELSAALDSVVPNSGDLFKSGSAGSNIALISNGDGGNDFDVRGIYSSQRDFSGFQGGMTNGTTVGPNGLTKRQELLVRSAIKYWVERHRHVVKFVTSIGDTYGTALLLHMLTSTVTLTLLAYQATKIEGVDVYASTTIGYLVYTLGQVFVFCIHGNE…
HhalGR64f	MTHLFSFTDVVLTRKLILRQTNYMYFDKSLELCQANIRLDEANMDSIIRNGGSQFVQVATIPIADRHKTHKTIESQGVSNKGESVIQALRPVYPIARILALPDNDEKFTWRNWKTMTCLFLLTWGIFLSSATVIKVSGETFSYTAVGQITFYCIVTVYLILFLKLSTEWPDLMEEWLEVEQQMVGMPPVRAVHKIRIVFLSIFIYAIVEHVLCQLYNLERARMCDENNFIERYFLEIYDNVFRHFRFSMWMGIILVMMNFFLTLVWTFTDIFLMSVCIALSVRFEQLQTSLKRIMGQDMSQEFWRESRKRYIKLSFLVKNLDEKFSLLMFFTFFNNVYSICCLLYRALKWRDLTTIHTIYNCAAFILVTVRLYGICLAAGKIHDISKDILPVLFAVPSQ…
HhalGR66a	MIAIGLTVALLEIAMSCGQFCFLVDTVSDFFDSGAKLNRVEQDNLSNTAELRGVPNKAGEIYEGIVCPIGGALGIKLGLEDLDFVDWKRPREKDFHPPPILVRFFRRAVSDELIRLRKVKRDFSTRHFDWDSDERINIGEEMTIACIKPPVPFEKLIITEKLVDVVNQLVSTSCKINAIYSLPLLTTVLASYISIICHLFFIYENGNNGELRLHNVPADCLMLLYRSLVVWRLSHSAAVAHRKSKKFNVLLYKLMIEDKTNEFLRNDKLKLHIGMKREVVFTACGFFNLDYTLVHSVIASATTYLVISIQFGELLN
HhalGR28a	MRAFDVYWETSPLFSISKIFGIAPYNSIFRLSLVHTSITILFLSLILGDALYLGIYMEQVNDSYQLSGFSLMLERFQLIMVIVTLIVCMMKAINNVKLIRIVMETLGTVDDYLLGLNVEEKRERYSMYVTLFVRLFSLFSLIMVDLVITKMYRKLDSILIECMLMYPLIIINIVETQFIVLLNVVKKRLIAVKKKLNEITKKGVRNINLEILQTLATAHSTLVDICQDINSLYSHQILMIFSGIFILTTTNLYHVVEKLIVFVAKKDVKMLNFATITSYRVMVRAYEVWTVVRSCSKANEKAKEFNTQLYQLMIDDRMNDISNDKKLRLHIAMKRDVVFTACGFFTLDYTLVHSMIAAATTYLVILIQFGKPNSNSSPDASNNATLLLNTSTTSLPLMI…
HhalGR68a	MMKPDVKRCLGILMGPAKMLGLFPIAWDERRCYRISVPFIAISSLKCLAYTVVTIVYLSVNFTASENIALGAEIDYISLILINAIPILSVCELVCTLHEFNECIFFLEAAELQLLQLGKFVDYDTSKRPLWINALLALGAFFARFAKNAIIDPAAVLLSGLQVLVTFSLISHMIVLVYWYFGVVGILTKLFAACNQEVRNYVRDFVVLKMRKVEKLARAHHTLCLCTTTLNDIHGAQLVAIFLSCFVLSVTEVYRCIIFLEEKVDVTFFLVIAVKLCCIILCFNLCLQIVTACKECSAEAKEFHTLLYQLMLDDKTNDLSNNKKLCLHIAMKREVVFTACGFFKLDYTLVHSMIAAATTYLVILIQFGQPRSMPTLPTNSLKSSEYTNATSPSTRII
HhalGR32a	MFSLTSCLFQVDHVNRVFGFQLLVVFINIFTALVDELYHLIYLKSSGQFGDDILEVLFLLVSLAYTFFNTFAITSACDKTVVKAKEFNTLLYQVMISDKTSIVSKNKKMRLHASMKREIMFTAYGFFSLDYALVHSIAAAVTTYLVILIQFSQPTPGSD
HhalGR63a	MAYEYLPSVYIRRKDAEESTTKYSKRRSEVSVLYQVLEPILLLMRLAGRFPYAINQKPDKEMHCGWAVYSAAVGVLQFAGVYFTSNLSYSLSLGNFDEQIFATVTTIVCFILGLNPFLTWFEAPWLSAYLDKWSAYQDELRSFDVILDTRLQKWLLLWILALFPYTAVVAYFLDVRRGDPTAFPVYLLLQIGSYLLLTLWFFMVFFIEDTASRLLARIGDASAEREVAILKKLWLTLANLTTELGHVLSLTLILFMISCSIIGIANCYSLLFFLRDCFLDNCDSSSYQQIPIISQVGTLIVSAIIIIAICEHGHRCTVSVGSNFLKEILKINFSLRNENTQRELHSLVQTILLRYPDMALGCYFTVNRRLLATMVTTAITYLIVLLQFRSTGIKT
HhalGR43a	MQIRSGSLEVTTKIFETEIKSLPSCGDLHWDICEAIAYFNASFKTQLQLQFLALFIKLIDCPYFIFLTLSYGLNFQYIVSSLIYTLLQIAQILAIVSPCSAATKAGNDTSFILCKHLHSGIPMAMKKNIKSFLTLLEVHRTDFHCGIFTLNESVVSAIIGSVTTYLVILIQFQDEDFDS
HhalGR2a	MDTRLQSNSLNDVFVEDIFIKIIFLLSKLIGIFPCRYRNGQFFASIPLCIWSFLIACAMSFTTVYFHINLFIPKSRIKLLVVDTLTQVIVSLWFCFCLWVMYLIAVTNSVARMKQMNRILSGLNEIDRQLIILEIRRCWRQRFMYFAKSYFAGLFVVILCITQSPLISLWTGLKGFLFLPACSVWLCAAQFTALADQVTHRLDEACIALNDIVLTRHFSISDKKLVTLSQVQDKLCDIYVILDSSNAWLITCIISVCFNGILIPFYMALTAFFLAEAAFNINVIVSALCWIFISLHTVWLIVSTTSGITMKLKGFNLTLYKLMMSDKRNEVLRNNKLRLHISMQREVVFTAKGFFKLDFTLIQWIIASATTYLVILIQFTPPGDETPTDTLKSDVNNTV…
HhalGR22	MFWCITLYELRTASDKLLNRIIASGCRNMYQYRILWLKLSDLISTIGESIGHTGLAVCALIFTTFVFTTYGLLSLAIDHAFTKSFCGLLCTSLLSMSLQFIMCDAAHRTTQAAGEKFSSKLLELSTSSLSQKDQFEMNFLLQTMMTNPPVIHFIGYMIIDRNLFVKFISDTVTYLVVLIQFKTSSLARSLVNASSEVFN
HhalGR1	MINNNIMRDRIDVDLLGNITTQSILHYLSEEERKDNKKKKEKADSRSTIQLELRTPLLLAQFLSLLPIYGVSNPDYRKLRFEWKSWKVLYSFGIITFNIILCIFALNRYIRDRGVTYRSLGNPASIRDIMFFGSTLLISMSFLILVRQWKDFIGKWASLQGEMNNFESSNVQKKIKLLTNCLLFSSIFEHILSNTQFMLNVEENQDRLRMFLDDKNVSSVLGFNTWCYIFIYFGNFLITLIWNYTDIFLTAVSLSLANMFKQFNRDLRMTAAMVSHDNALSYWRRKRELYNSLSLLAKTVEEKISRLVLISFSVNLYFICIQLLNSIQPLTSFLQVAYFCGSFGHILFRTCSVCFAATSIYEHSKGSLPTLYSVSSEQFNSEVQRLIDQVTGETLALTG…
HhalGR2	MINNNIMRDRIDVDLLGNITTQSILHYLSEEERKDNKKKKEKADSRSTIQLELRTPLLLAQFLSLLPIYGVSNPDYRKLRFEWKSWKVLYSFGIITFNIILCIFALNRYIRDRGVTYRSLGDIMFFGSTLLISMSFLILVRQWKDFIGKWASLQGEMNNFESSNVQKKIKLLTNCLLFSSIFEHILSNTQFMLNVEENQDRLRMFLDDKNVSSVLGFNTWCYIFIYFGNFLITLIWNYTDIFLTAVSLSLANMFKQFNRDLRMTAAMVSHDNALSYWRRKRELYNSLSLLAKTVEEKISRLVLISFSVNLYFICIQLLNSIQPLTSFLQVAYFCGSFGHILFRTCSVCFAATSIYEHSKGSLPTLYSVSSEQFNSEVQRLIDQVTGETLALTGCKFFTV…
HhalGR3	MLTIYKNQIFAEGVYSRNHHKNVTNVGTKHRNIHFKIQPQLMAKDNIYFNEMKPIFIMLRMVGRFPYSFTKTGFAPFSFISWPVLYSLVFNLVFVLMTIRSMQIMINDKIYPSRSYDETLFWFLLLLFALQSFTGPITFWMDAPGLVSYFQKWKDFEDFWRLGTLYSVNRHRFTRFFSISIMPLVALFVTYETLTLPKISILIFLPHIPIVIALLLMQVYWWLTLHDLTQYSEKLLTSMLKVKDRRGMGYRRRIWQQISNLVTEIGNAIGASGLSYSITNFVGFILSTYGILINLASPGSSDVSVMGLLLPAVACAMTIFLVTDAAYKATECVGHKFTKNLLQIDLSTLSRSCLSEVDLMFNSLSANSPVIEYLGFMKITRNTFLQFVSHTATYLIVLV…
HhalGR4	FNVLWPNKTLNMMKPDVKRCLGILMGPAKMLGLFPIAWDERRCYRISVPFIAISSLKCLAYTVVTIVYLSVNFTASENIALGAEIDYISLILINAIPILSVCELVCTLHEFNECIFFLEAAELQLLQLGKFVDYDTSKRPLWINALLALGAFFARFAKNAIIDPAAVLLSGLQVLVTFSLISHMIVLVYWYFGVVGILTKLFAACNQEVRNYVRDFVVLKMRKVEKLARAHHTLCLCTTTLNDIHGAQLVAIFLSCFVLSVTEVYRCIIFLEEKVDVTFFLVIAVKLCCIILCFNLCLQIVTACKECSAEAKEFHTLLYQLMLDDKTNDLSNNKKLCLHIAMKREVVFTACGFFKLDYTLVHSMIAAATTYLVILIQFGQPRSMPTLPTDSLKSSEYTN…
HhalGR5	MKQGSMSKAWITTSVSHNKPYKKVPVKKYFQEIKPLILLQRAFGKLPYSFNEEGFAPFKLLSFPVIYTIIFIVFQSTWTVYSLCIIIQEKIHKAPSYDVTLYWVSIGLFLLLNFTTPMTKWIDIRKFVHHVSSWQDFQNNHLDAELGANLSLTLMIASVLLLPIASVFIYCQSYLLTDLSLFVMVPYIFSFVETGVIIIHWGVVLYELRIASRTLLSKIIMDGCRQMSTYRRTWLELSKLVSGVGESLGHTGLVISIVLFTTFVLAMYALLSSLFEPAKTCNHVWGLLINAVLSLLCNLFLFNAAHRTTQEVGPDFSCKILASDLTHLSQVEMNEISLMVQTISANPPTVEYLGFVTVNRSLFVSLVSNAVTYLVVLIQFKASAPEKPVKEEVVQ
HhalGR6	MYFSSECIFNIILLMTKLLGVFPYDHVRKRVSYQWFTYSLIIVLVCTVEAAFVVFDPPRLAKNSLLRNILFRCQMLAMYACIVIFNACILIHRRKISLVFLILEKLKSETRGQPSFLLVLGYFCWQSLAITVTAYNDWNGNTPLDGTVSLALCYYYGMISIIVVGTAPFVALVLLVSTKLEHLVIALKSKVTLGSGRLYSYVLLYDRMVSLLTSLNEAFSLQLLLISFVSFFNLTINMFFIADYVVNDASIHRAKMVPVYMGWITMFSSMVIFPVYSCHRTTKQAKEFNTQLYQLMIDDTTNDISNNKKLRLHIAMKREVVFTACGFFTLDYTLVHSMIAAATTYLVILIQFGQHQSTAPELPANPPDFSNTTALPLSTSTI
HhalGR7	TYTSLQDSTMVKGVHNALSLVLALSRAFGAFVLRAQGRTYVFSYKLISYFIVLAMGTIAEGIIEASNLQSECSFSLLLIVDIFVFCFYLITAIIVLYQHYRLREPLPAIISELEDMEDHIGDVSYGRYYSYGVIFLSILNALPRIFAVLRRSFAWNYLLTRILYYSFTQIPLLIAAQYAMFLHILSRQLYTLSEQLNTAIFNLEVWRLIDIHHNLVLLADRINRAFDLFLIHMVTFIFVINILRLYFLIVYIVNPVSYTDLELTIISFVDILINCGSLIIIVSAAMEATKKAELFNKQLLKSLLISKTIAQDEKIRTYLGMKHSIQQSACNFFSLDYHLLTSMAAGTTTYVILLVQFTLL
HhalGR8	KGVHNALSVVLALSKAFGAFTMSFQGQIYVFSYKLYAYFIVLVIGVLVQGIIDAFIASSEHPLSLVMFIDYFVFSIYIFTAIIISFQHYYLRESLPAIISELGDMDQLIGNVSYSGYYKFGVIVLFVLNALPRIFAVAERPFTWNHLLKRTLYFFITVVPVLVGGQYGSVLQILSRQLHSLSEQLNNFQSNLEVWTLIDVHHNLVLLADRINKAFNMYLLNTITFCFVIDILKLYFVIVYIVKPVTYTDLELTVISSMDILVNWGSIFTIVFAAMEAKKKAELFNKQLLKSLLISKTIAQDEKIRTYLGMKHSIQQSACNFFSLDYHLLTSMAAGTTTYVILLVQFTLL
HhalGR9	QNALSFVLAMSRPFGASVLRVQGWTYVFCYKLYSYLILLVTTTIAEGIIETSFLISLYSLSFLFIIESSVFWINTTTAVIVIYQHYQLREELPAIISDLECMDSLIGGVTYSGYYNYGAIILSIVTATPRIIAILLRPLSWNNVFMRVLYLFITEIPILIATQYAILLHILSRQLHTLSEQLDAVMFNIKVLSLIDVHQNLVLLAGRINTAFDTFLMYMITSIFVINISTLYFLIIYIMKPVSAIDLPLSIVCALSFLVNCGLLMLMVFPAMEATKNAELFNKQLLKSLLISKTIAQDEKIRTYLGMKHSIQQSACNFFSLDYHLLTSMAAGTTTYVILLVQFTLL
HhalGR10	GNFIRRMKQGSMSKAWITTSVSHNKPYKKVPVKKYFQEIKPLILLQRAFGKLPYSFNEEGFAPFKLLSFPVIYTIIFIVFQSTWTVYSLCIIIQEKIHKAPSYDVTLYWVSIGLFLLLNFTTPMTKWIDIRKFVHHVSSWQDFQDGCRQMSTYRRTWLELSKLVSGVGESLGHTGLVISIVLFTTFVLAMYALLSSLFEPAKTCNHVWGLLINAVLSLLCNLFLFNAAHRTTQEVGPDFSCKILASDLTHLSQVEMNEISLMVQTISANPPTVEYLGFVTVNRSLFVSLVSNAVTYLVVLIQFKASAPEKPVKEEVVQ
HhalGR11	GNLLRRMRNRTLSEAWVTTSVFSIKPYTKVSVNKYFLEIKPLIILQRALGKLPYSFNKHGFDPFKIISFPVLYTIVFFTLQSAWTIHTMSVIIKEKIFNAPSYDMALFWVSLELILLLNIASPITKWIDVHKYVQFVNNWKDFQNGCRQMSTHRKTWLKLSKLVSEVGDSNAHTGIIMSVTYFTSLVVTTYALLSSFSRLADYNSHFWGHLVSTLIGFLSNFVLCDAAHRTTQELGPEFSSKILAMDMTHLSQSEVNEICLLLQTMSAHPPLIGYLGFVTINRNLFVSFMSNAVTYLVVLVQFKSTSPLNPIKEDITQ
HhalGR12	PFSFISWPVLYSLVFNLVFVLMTIRSMQIMINDKIYPSRSYDETLFWFLLLLFALQSFTGPITFWMDAPGLVSYFQKWKDFEVKDRRGMGYRRRIWQQISNLVTEIGNAIGASGLSYSITNFVGFILSTYGILINLASPGSSDVSVMGLLLPAVACAMTIFLVTDAAYKATECVGHKFTKNLLQIDLSTLSRSCLSEVDLMFNSLSANSPVIEYLGFMKITRNTFLQFVSHTATYLIVLVQMKTQPKHSKNGPFPDSYGNSTDFENT
HhalGR13	EVAILKKLWLTLANLTTELGHVLSLTLILFMISCSIIGIANCYSLLFFLRDCFLGNCDSSSYQQIPIISQVGTLIVSAIIIIAICEHGHRCTVSVGSNFLKEILKINFSLRNENTQRELHSLVQTILLRYPDMALGCYFTVNRRLLATMVTTAITYLIVLLQF
HhalGR14	INRAFDTFLIHVITFNFVIGTMKLYFVVVYIVKPIAYTDLELTVISAVDFLVNFGSIVIIVTAAMKANKKAELFNKQLLKSLLISKTIAQDEKIRTYLGMKHSIQQSACNFFSLDYHLLTSMAAGTTTYVILLVQFTLL
HhalGR15	VELWSVVDTCEAVIQKAKDFSAALYQFMIDESTESCKNKKIRLHLTVQKEPCFTAYGFFDLDFTLLHSIIAAATTYLVILIQFSQTTTSYPKRVLLNTTASYNSSYSNYTEAlucGR66bMVLLIYFAVFFVVVLKPIVLNPVFTVLHHSFHIVLALGISMSFYRIISRKNQLEEVISIIRSTHKFLGLPPSKDGRFGLLVFISVVVITSAELVHFTHNNNVPQKMTHAFFSLYTTIGVSISCQFLWFVNRILECYEGLNKILGREDDPFPQPNRLVIIQNDLVRSAELLNDCYSLQLFFVISSVFCSSTLMGVVLIRNPNMYLKISLAAWVIVNITVPVLIIRCCERLEKKAERFNKLLASCALKDKTERLLTNPHITMHFATQKPLKFTACNCFNID…
AlucGR66a	MMMVANQFMGLVKHVDLSLSCLLKQLKSPDQTPSKELLKSYHQLYDVSKLIDDAFSLQNLILIIHHVFATTFSMYYFFEAIMHLYPSSSVKKRIWLNLATYILYFSCICLKFALCQTVQSKAKDFKETLYDKIFNDSQEAQTLALRPLYKKIKFSAFDVLDMDFKALKAIIMTIVTYQVILLQFTVSNPSTDKKDFHNNSSSLEQNRSRS
AlucGR32a	MMGPKRGVAPHHVKVGSLFPGRDTKRTDLMTLLQMSKAFGLLPLDDGLNYSVMWIVYSIGFSVAFTFLSLGYKTYYMVDTDDFENNAWHKIIFYCRALVENIIIVSHLAQVLVHRKELPEVLKEIKKIGLRSTYARYFAPVGYLIIILNFVVIAVLEQNSSTSTRASLATAFCEVLCLIILVQFCAVLEVFKNEMDVLTSRISINQAKLEVLSDRRQVILEMAGSTNKVFSVQLLLICFKLFTDVIYFAYFTIIEIKEIATPKGNPIKVIRMPLYAVWQLFELYSISSSTEKLVESAENFNAELFQLMRDNKDLCKNKKLSLCLALKQTVNFTACGFFTLGYPLVTSIIAAATTYLVILVQFSL
AlucGR28a	MSLGAHWVSIFRIRPHLPLLIDYLISIDSKLPILVKGLSLSKTYHSLAFLFFSKLAASFVVFGVYLLLHYDGDNTLWRVTLVAHNFVSLTCELQLLIFILMIKSRFQVVNRALSSMCHDMRSARISVKSRKILYPKIEKSSDLHHIELAHDCYLKLVDSWILLNKIYAVQVLFSTGGCFLKALFNVYFLSSSSIDDWPVLQNDLINSVVWMVFYFSRFAMLALVATSASHEFAKTKAITALMSHWYDDSTIREELDIFWTNTSCRKLKFSTCGLFTLDSGLIIKACVTGITYLVLLVQFKPQIAVN
AlucGR63a	MMLSSVIFMLLYWVLSAFELINIGELIKLRISEELCSLEVKNVEASKIRDLRMAWLGLVEMIKLNTKSWSYIFTYMVLTLLFVIIMTSFGFISILVKENRFDFDLLFVSLSVAALSYIMFECGHRLTHKAGYEICEVLGNVNILNMDKAAKEEVKFFTKAAKMNYPLVTLGGVFIANRAAMTSMVSSIVTNLIVILQLPKDSSSFVHLSNASNNTNIA
AlucGR22a	MTGNDLKIKLKAWVYTVLTIIPSLSLLASFTEQETLVIRNILQRLLYIMLFSGMSFVAMFWIMSHVVVQRIAVYLKGELMKLGVNSRNRSNVSAMEVHRLRYLWARATSLLHKSGECLGLSMMIISLTNSASFVIAAYGVIVGILEFNQEAVLHQSVNVVAGIAYIFAGTESGYQSTQKMGDDIMAALSAIDLSGINDVTSREINMFLQIMSLNPPIVTCAGVVTISRSFLTSVFSNTVTYLIVLLQFKTTDVEFNCNNETLTSILQKPEG
TeleGR1	MAFSNTDNFDLRPEDLNETNVVASANIPKKNKTNEYFSEIKPVLIVLRVFGRFPYRFTDSGPAPFSLLSIPAIYTGVYYIISTFFSYWQDRELSVKVLASGARIDVVMLSVLLILFSIHNLLIPFSYWADAPKIAAYIHGWMELQELAKEEGISLKYGRPLRIAAPIMMVITTLTIILVSLFLPDVSKLGFVQFVPIIISVVEFHDVLWIVTLLEIQHISEYLIYRIEKATTRSELSGARRAKLCADLALSRLGEATGRTLLSISSVSYFSFMVCLYSLLRMLISGLVGSSFWSILFLTFFYLTSRFVHCEAAQYATSKMRDCFREKLMNMKLETKSAECLTEIKLMLSGLSLNPPVVQYCGFFTINRRYFTNFIGITVTYLIVLLQFSPSPKDVVEAL…
TeleGR2	TPTNYTNKFRWLSPRTLWLAIFLITSCTLALLTIKNNVQKLEFASFGSIIFYLLATIYLVYFLWLSLKWPGLRDRWSAVEEKMSAMPKIRVHTTVAVIVTSFFIVGLCEHALSILDNTRHIMNMNCSKSTTTLETYYRIQYAVIFHWLEYAHWKGAITSLVVLMLTVLWTFTDVFAISLAIVLGTRFKQLKVLIEQVKGKEMSESFWKQTRERYVDLSLLAREIDQKISLLIFLSLGNNIYSIVVMLINVLSVKTNYDYLQTVYYGLSFAFVLMRLTGACVYAARIHDHCTDLLPLLFAVPSSSYCIEVHRFIMHVRYYPVTLTAFNFFSITRSTFLKIAGSILTYEIVLIQFEFLNADETKRRPVPVCPE
TeleGR3	NLGYFEPPFASKESNRHCSLINGSAMYLSNEPLESRLGMNARVHSFLSRKRAPLFRSEISSPQNVVHFFPDEERKIFKRRAQIETIKKENAFVELRTPIVIGQVFSLFPVYGISRPDPSYLTFQWRSFKVAYCFYIFFFQISFSILTILTYSRGETSYKSFGDVVFYGGTACMSLFFLRLAKGWKELIEYWVSVQEFMNGLKELPVRRKINIIAIGLTISSISEHLLANADFFLNLNNRKNFESYMQGRHSQVFKVFPYNMYVSIIISLINFIITMIWNFTDIFLTSVSLALGKMFKQFTLDLEESSKNLSQEMSLSYWKRRREIYSRLALLTKFLDDKLSILVLMSFGINLYYICIQLLNTMKPLRSVSTFIYFGGSFGHLLFRTCAVCFAASSIYEN…
TeleGR4	MLKGKDIYWESFPPFFISRFLGVSSMDDQFYINKSYLGINMILLTMYATLSIYLWVDMESTNNIFQMSGFSLILERAQLIIIFITVTVSTIKSILNIKTLRGVIEHISFLDKNLHEIGVKVPYSRVYGYILITAKIILLLILWLSDFVLFKSYSNWSFLLVQFNLIFPLLVANVIQVQFMVLLELVQRRIRTLSAKLNDIDKGKNFVKTNHLHVLISVHSSLLGICEIINALYSPQILIILSSIFIVTTANLYHVIEKLIGFISQKKLSDLNFLAMTTYRIFVRSLEVWTMVTTCANTQELAREFNLNLYQLMIDDKSNEISANKKLRLHVTMNKEIVFHACGFFTLDYTLVHSMIAAATTYLVILVQFGLPSEKDKEVNCTAPAN
TeleGR5	MVTEFKGTSLFTIKDFNKKGVTSGMQNLGKEEIAHKAFKPLLFVALSMAVMPLYGISGNNSSKIQFKWMSWRALLATVMIIFDLALIGITIFHRGINRGSTGSLVFYSVTALGMIFFIRLGCKWKDVIRKFTEATDFLDFQGDKAIRKLKLITITLVFLSVGEHTLANVNAYFKDLTKEGDGLKVFLLNKFFFIFNFTDYAVWKGLLLIFIHLQTTIVWNLIDIFIINIATLLSDMLKFYNNSISSTLPKSKSLAYWKKKRETYSVLVSLVKEINHKISNLVVLSFGSNLFFICMQLYYNLTVQHPSTVKSLYFLISFGFLLMRTCFVCMSASSVYERSQTTMDILFALPTSQFNVEVERLLDTVRGETLAVTGYNFFTVNRKLMLTVAGTIATYELVL…
TeleGR6	MLGIEEFSFCSFPTTYSVLFYVGSCAMNLWTSLTSLREKIVSAETFGELDFWIIVLVFGWQVYLLPLSYWWDAPSTRAYFKKWRSFEEFVKVDRRELQGVRTIRIATYSALPISVIFLIVNKFIFVDISVFVFIQFVPVIAASFITIILWAGTLYELKNFSRYLADRIIKARCEKELEYRRQTSLKLIELTLGLGKALGSSLISISIIFFTCFVLCVYTLMVGRQDNSGPFIFGLFSGTLLFGSPIFLLAETGHRAIETIRNDFFSKIIKIDMTKLSPSCKSEIKLILDGTMRLSAGIEYNGFVASNRQTLTSIAGSAVTYLIVLVQFNGKPPTIRDITFSPTSFSP
TeleGR7	MCEQPEGRVLRMVEDILHPSRMFWVYPLKRRDREYVVSRTMLFGTAVLSCVYAVGFGYILTHTLEVTRRNSYITKAANLADCLIMLAVPQVAVVSLVSSLRSFNSSMISLQDAADLLADFDVPAVPRTWPRTVDFALILSTFTFGIAETFFSDNNSYFDGIFVRVYYDILLFKIILVVNSFTALVGMCSSLFAISTKALLMFLKSSIFYRAKKMEILISAHFKISESAIILSKIQSPQLMLIILLTFFAFISETYELYALVTIESGFTKELIVLSALTKSCWIIATAYLTWNILQSCVQLTDKAKEFNTLLYQLMIEDKTNDILNNKKLRLHITMKREVVFSACGFFNLDYSLVHSMAAAATTYLVILIQFGTSMTASSNSPANQTEPSD
DmelGR5a	MRQLKGRNRCNRAVRHLKVQGKMWLKNLKSGLEQIRESQVRGTRKNFLHDGSFHEAVAPVLAVAQCFCLMPVCGISAPTYRGLSFNRRSWRFWYSSLYLCSTSVDLAFSIRRVAHSVLDVRSVEPIVFHVSILIASWQFLNLAQLWPGLMRHWAAVERRLPGYTCCLQRARPARRLKLVAFVLLVVSLMEHLLSIISVVYYDFCPRRSDPVESYLLGASAQLFEVFPYSNWLAWLGKIQNVLLTFGWSYMDIFLMMLGMGLSEMLARLNRSLEQQVRQPMPEAYWTWSRTLYRSIVELIREVDDAVSGIMLISFGSNLYFICLQLLKSINTMPSSAHAVYFYFSLLFLLSRSTAVLLFVSAINDQAREPLRLLRLVPLKGYHPEVFRFAAELASDQVAL…
DmelGR8a	MSGHLGRVLQFHLRLYQVLGFHGLPLPGDGNPARTRRRLMAWSLFLLISLSALVLACLFSGEEFLYRGDMFGCANDALKYVFAELGVLAIYLETLSSQRHLANFWWLHFKLGGQKTGLVSLRSEFQQFCRYLIFLYAMMAAEVAIHLGLWQFQALTQHMLLFWSTYEPLVWLTYLRNLQFVLHLELLREQLTGLEREMGLLAEYSRFASETGRSFPGFESFLRRRLVQKQRIYSHVYDMLKCFQGAFNFSILAVLLTINIRIAVDCYFMYYSIYNNVINNDYYLIVPALLEIPAFIYASQSCMVVVPRIAHQLHNIVTDSGCCSCPDLSLQIQNFSLQLLHQPIRIDCLGLTILDCSLLTRMACSVGTYMIYSIQFIPKFSNTYM
DmelGR9a	MSLWLEHFLTGYFQLCGLVCGWSGSRLGRLLSSTFLVLILIELVGEIETYFTEENPDNESVPAYFAKVIMGVNMAYKMIHAWIALSALFECRRFRYLLEELPPVKATSFIYRHLILEIILFACNAFLVLSEYTIRGIYLENLRYAYSLQAVRARYLQMMVLVDRLDGKLEQLHHRVISGSSDYKTLRLDYAHLAKVTRSLSHLFGLSLLLLNVLCLGDWIIVCNVYFMVAYLQVLPATLFLFGQVMFVVCPTLIKIWSICAASHRCVSKSKHLQQQLKDLPGQTPVERSQIEGFALQIMQDPIQIDVCGIYHLNLQTLAGMFFFILEALVIFLQFVSLVRT
DmelGR10a	MTSPDERKSFWERHEFKFYRYGHVYALIYGQVVIDYVPQRALKRGVKVLLIAYGHLFSMLLIVVLPGYFCYHFRTLTDTLDRRLQLLFYVSFTNTAIKYATVIVTYVANTVHFEAINQRCTMQRTHLEFEFKNAPQEPKRPFEFFMYFKFCLINLMMMIQVCGIFAQYGEVGKGSVSQVRVHFAIYAFVLWNYTENMADYCYFINGSVLKYYRQFNLQLGSLRDEMDGLRPGGMLLHHCCELSDRLEELRRRCREIHDLQRESFRMHQFQLIGLMLSTLINNLTNFYTLFHMLAKQSLEEVSYPVVVGSVYATGFYIDTYIVALINEHIKLELEAVALTMRRFAEPREMDERLTREIEHLSLELLNYQPPMLCGLLHLDRRLVYLIAVTAFSYFITLVQ…
DmelGR10b	MRVGKLCRLALRFWMGLILVLGFSSHYYNPTRRRLVYSRILQTYDWLLMVINLGAFYLYYRYAMTYFLEGMFRRQGFVNQVSTCNVFQQLLMAVTGTWLHFLFERHVCQTYNELSRILKHDLKLKEHSRFYCLAFLAKVYNFFHNFNFALSAIMHWGLRPFNVWDLLANLYFVYNSLARDAILVAYVLLLLNLSEALRLNGQQEHDTYSDLMKQLRRRERLLRIGRRVHRMFAWLVAIALIYLVFFNTATIYLGYTMFIQKHDALGLRGRGLKMLLTVVSFLVILWDVVLLQVICEKLLAEENKICDCPEDVASSRTTYRQWEMSALRRAITRSSPENNVLGMFRMDMRCAFALISCSLSYGIIIIQIGYIPG
DmelGR22d	MFRPRCGLRQKFVYVILKSILYSSWLLGIFPFKYEPKKRRLRRSMWLILFGVVISSSLLILMVKQSAEDREHGIMLDVFQRNALLYQISSLMGVVGVVSICTVHLRTLWRSKHLEEIYNGLMLLEAKYFCSNAVECPAFDGYVIQKGVVIVVGLLAPWMVHFGMPDSKLPVLNVLVVSMVKLGTLLLALHYHLGVVIIYRFVWLINRELLSLVCSLRGNHKGSSSRVRFLLKLYNKLVNLYSKLADCYDCQTVLMMAIFLAANIIVCFYMIVYRISLSKMSFFVMLIMFPLAIANNFMDFWLSMKVCDLLQKTGRQTSMILKLFNDIENMDKDLEISISDFALYCSHRRFKFLHCGLFHVNREMGFKMFVASVLYLLYLVQFDYMNL
DmelGR21a	MSFWAVSRGLTPPSKVVPMLNPNQRQFLEDEVRYREKLKLMARGDAMEEVYVRKQETVDDPLELDKHDSFYQTTKSLLVLFQIMGVMPIHRNPPEKNLPRTGYSWGSKQVMWAIFIYSCQTTIVVLVLRERVKKFVTSPDKRFDEAIYNVIFISLLFTNFLLPVASWRHGPQVAIFKNMWTNYQYKFFKTTGSPIVFPNLYPLTWSLCVFSWLLSIAINLSQYFLQPDFRLWYTFAYYPIIAMLNCFCSLWYINCNAFGTASRALSDALQTTIRGEKPAQKLTEYRHLWVDLSHMMQQLGRAYSNMYGMYCLVIFFTTIIATYGSISEIIDHGATYKEVGLFVIVFYCMGLLYIICNEAHYASRKVGLDFQTKLLNINLTAVDAATQKEVEMLLVAINK…
DmelGR22b	MFGSSREIRPYLARQMLKTTLYGSWLLGIFPFTLDSGKRIRQLRRSRCLTLYGLVLNYFLIFTLIRLAFEYRKHKLEAFKRNPVLEMINVVIGIINVLSALIVHFMNFWGSRKVGEICNELLILEYQDFEGLNGRNCPNFNCFVIQKCLTILGQLLSFFTLNFALPGLEFHICLVLLSCLMEFSLNLNIMHYHVGVLLIYRYVWLINEQLKDLVSQLKLNPETDFSRIHQFLSLYKRLLELNRKLVIAYEYQMTLFIIAQLSGNIVVIYFLIVYGLSMRTYSIFLVAFPNSLLINIWDFWLCIAACDLTEKAGDETAIILKIFSDLEHRDDKLEMSVNEFAWLCSHRKFRFQLCGLFSMNCRMGFKMIITTFLYLVYLVQFDYMNL
DmelGR22f	MKMFQPRRGFSCHLAWFMLQTTLYASWLLGLFPFTFDSRRKQLKRSRWLLLYGFVLHSLAMCLAMSSHLASKQRRKYNAFERNPLLEKIYMQFQVTTFFTISVLLLMNVWKSNTVRKIANELLTLEGQVKDLLTLKNCPNFNCFVIKKHVAAIGQFVISIYFCLCQENSYPKILKILCCLPSVGLQLIIMHFHTEIILVYRYVWLVNETLEDSHHLSSSRIHALASLYDRLLKLSELVVACNDLQLILMLIIYLIGNTVQIFFLIVLGVSMNKRYIYLVASPQLIINFWDFWLNIVVCDLAGKCGDQTSKVLKLFTDLEHDDEELERSLNEFAWLCTHRKFRFQLCGLFSINHNMGFQMIITSFLYLVYLLQFDFMNL
DmelGR22e	MFRPSGSGYRQKWTGLTLKGALYGSWILGVFPFAYDSWTRTLRRSKWLIAYGFVLNAAFILLVVTNDTESETPLRMEVFHRNALAEQINGIHDIQSLSMVSIMLLRSFWKSGDIERTLNELEDLQHRYFRNYSLEECISFDRFVLYKGFSVVLELVSMLVLELGMSPNYSAQFFIGLGSLCLMLLAVLLGASHFHLAVVFVYRYVWIVNRELLKLVNKMAIGETVESERMDLLLYLYHRLLDLGQRLASIYDYQMVMVMVSFLIANVLGIYFFIIYSISLNKSLDFKILVFVQALVINMLDFWLNVEICELAERTGRQTSTILKLFNDIENIDEKLERSITDFALFCSHRRLRFHHCGLFYVNYEMGFRMAITSFLYLLFLIQFDYWNL
DmelGR22a	MSQPKRIHRICKGLARFTIRATLYGSWVLGLFPFTFDSRKRRLNRSKWLLAYGLVLNLTLLVLSMLPSTDDHNSVKVEVFQRNPLVKQVEELVEVISLITTLVTHLRTFSRSSELVEILNELLVLDKNHFSKLMLSECHTFNRYVIEKGLVIILEIGSSLVLYFGIPNSKIVVYEAVCIYIVQLEVLMVVMHFHLAVIYIYRYLWIINGQLLDMASRLRRGDSVDPDRIQLLLWLYSRLLDLNHRLTAIYDIQVTLFMATLFSVNIIVGHVLVICWINITRFSLLVIFLLFPQALIINFWDLWQGIAFCDLAESTGKKTSMILKLFNDMENMDQETERRVTEFTLFCSHRRLKVCHLGLLDINYEMGFRMIITNILYVVFLVQFDYMNLKFKTD
DmelGR28b	MIRCGLDIFRGCRGRFRYWLSARDCYDSISLMVAIAFALGITPFLVRRNALGENSLEQSWYGFLNAIFRWLLLAYCYSYINLRNESLIGYFMRNHVSQISTRVHDVGGIIAAVFTFILPLLLRKYFLKSVKNMVQVDTQLERLRSPVNFNTVVGQVVLVILAVVLLDTVLLTTGLVCLAKMEVYASWQLTFIFVYELLAISITICMFCLMTRTVQRRITCLHKVLKNLAHQWDTRSLKAVNQKQRSLQCLDSFSMYTIVTKDPAEIIQESMEIHHLICEAAATANKYFTYQLLTIISIAFLIIVFDAYYVLETLLGKSKRESKFKTVEFVTFFSCQMILYLIAIISIVEGSNRAIKKSEKTGGIVHSLLNKTKSAEVKEKLQQFSMQLMHLKINFTAAG…
DmelGR28a	MAFKLWERFSQADNVFQALRPLTFISLLGLAPFRLNLNPRKEVQTSKFSFFAGIVHFLFFVLCFGISVKEGDSIIGYFFQTNITRFSDGTLRLTGILAMSTIFGFAMFKRQRLVSIIQNNIVVDEIFVRLGMKLDYRRILLSSFLISLGMLLFNVIYLCVSYSLLVSATISPSFVTFTTFALPHINISLMVFKFLCTTDLARSRFSMLNEILQDILDAHIEQLSALELSPMHSVVNHRRYSHRLRNLISTPMKRYSVTSVIRLNPEYAIKQVSNIHNLLCDICQTIEEYFTYPLLGIIAISFLFILFDDFYILEAILNPKRLDVFEADEFFAFFLMQLIWYIVIIVLIVEGSSRTILHSSYTAAIVHKILNITDDPELRDRLFRLSLQLSHRKVLFTAA…
DmelGR33a	MIQIMNWFSMVIGLIPLNRQQSETNFILDYAMMCIVPIFYVACYLLINLSHIIGLCLLDSCNSVCKLSSHLFMHLGAFLYLTITLLSLYRRKEFFQQFDARLNDIDAVIQKCQRVAEMDKVKVTAVKHSVAYHFTWLFLFCVFTFALYYDVRSLYLTFGNLAFIPFMVSSFPYLAGSIIQGEFIYHVSVISQRFEQINMLLEKINQEARHRHAPLTVFDIESEGKKERKTVTPITVMDGRTTTGFGNENKFAGEMKRQEGQQKNDDDDLDTSNDEDEDDFDYDNATIAENTGNTSEANLPDLFKLHDKILALSVITNGEFGPQCVPYMAACFVVSIFGIFLETKVNFIVGGKSRLLDYMTYLYVIWSFTTMMVAYIVLRLCCNANNHSKQSAMIVHEIM…
DmelGR32a	MSPNTWVIEMPTQKTRSHPYPRRISPYRPPVLNRDAFSRDAPPMPARNHDHPVFEDIRTILSVLKASGLMPIYEQVSDYEVGPPTKTNEFYSFFVRGVVHALTIFNVYSLFTPISAQLFFSYRETDNVNQWIELLLCILTYTLTVFVCAHNTTSMLRIMNEILQLDEEVRRQFGANLSQNFGFLVKFLVGITACQAYIIVLKIYAVQGEITPTSYILLAFYGIQNGLTATYIVFASALLRIVYIRFHFINQLLNGYTYGQQHRRKEGGARARRQRGDVNPNVNPALMEHFPEDSLFIYRMHNKLLRIYKGINDCCNLILVSFLGYSFYTVTTNCYNLFVQITGKGMVSPNILQWCFAWLCLHVSLLALLSRSCGLTTTEANATSQILARVYAKSKEYQN…
DmelGR36a	MFDWVGLLLKVLYYYGQIIGLINFEIDWQRGRVVAAQRGILFAIAINVLICMVLLLQISKKFNLDVYFGRANQLHQYVIIVMVSLRMASGISAILNRWRQRAQLMRLVECVLRLFLKKPHVKQMSRWAILVKFSVGVVSNFLQMAISMESLDRLGFNEFVGMASDFWMSAIINMAISQHYLVILFVRAYYHLLKTEVRQAIHESQMLSEIYPRRAAFMTKCCYLADRIDNIAKLQNQLQSIVTQLNQVFGIQGIMVYGGYYIFSVATTYITYSLAINGIEELHLSVRAAALVFSWFLFYYTSAILNLFVMLKLFDDHKEMERILEERTLFTSALDVRLEQSFESIQLQLIRNPLKIEVLDIFTITRSSSAAMIGSIITNSIFLIQYDMEYF
DmelGR39b	MLYSFHPYLKYFALLGLVPWSESCAQSKFVQKVYSAILIILNAVHFGISIYFPQSAELFLSLMVNVIVFVARIVCVTVIILQVMVHYDDYFRFCREMKYLGLRLQCELKIHVGRLKWQSYAKILALGIGFLVTVLPSIYVALSGSLLYFWSSLLSILIIRMQFVLVLLNVELLGHHVSLLGIRLQNVLECHLMGANCTLDGNANRLCSLEFLLALKQSHMQLHYLFTHFNDLFGWSILGTYVVLFSDSTVNIYWTQQVLVEVYEYKYLYATFSVFVPSFFNILVFCRCGEFCQRQSVLIGSYLRNLSCHPSIGRETSYKDLLMEFILQVEQNVLAINAEGFMSTDNSLLMSILAAKVTYLIVLMQFSSV
DmelGR39a	MSKVCRDLRIYLRLLHIMGMMCWHFDSDHCQLVATSGSERYAVVYAGCILVSTTAGFIFALLHPSRFHIAIYNQTGNFYEAVIFRSTCVVLFLVYVILYAWRHRYRDLVQHILRLNRRCASSCTNQQFLHNIILYGMLTILCFGNYLHGYTRAGLATLPLALCMLVYIFAFLVLCLLLMFFVSLKQVMTAGLIHYNQQLCQGDLISGLRGRQQILKLCGGELNECFGLLMLPIVALVLLMAPSGPFFLISTVLEGKFRPDECLIMLLTSSTWDTPWMIMLVLMLRTNGISEEANKTAKMLTKVPRTGTGLDRMIEKFLLKNLRQKPILTAYGFFALDKSTLFKLFTAIFTYMVILVQFKEMENSTKSINKF
DmelGR36c	MDLESFLLGAVYYYGLFIGLSNFEFDWNTGRVFTKKWSTLYAIALDSCIFALYIYHWTGNTNIVNAIFGRANMLHEYVVAILTGLRIVTGLFTLILRWYQRCKMMDLASKVVRMYVARPQVRRMSRWGILTKFIFGSITDGLQMAMVLSAMGSVDSQFYLGLGLQYWMFVILNMAMMQQHMIMLFVRTQFQLINTELRQVIDEAKDLLLSPRHQGVFMTKCCSLADQIENIARIQSQLQTIMNQMEEVFGIQGAMTYGGYYLSSVGTCYLAYSILKHGYENLSMTLSTVILAYSWCFFYYLDGMLNLSVMLHVQDDYWEMLQILGKRTIFVGLDVRLEEAFENLNLQLIRNPLKITVVKLYDVTRSNTMAMFGNLITHSIFLIQYDIEHF
DmelGR36b	MVDWVVLLLKAVHIYCYLIGLSNFEFDCRTGRVFKSRRCTIYAFMANIFILITIIYNFTAHGDTNLLFQSANKLHEYVIIIMSGLKIVAGLITVLNRWLQRGQMMQLVKDVIRLYMINPQLKSMIRWGILLKAFISFAIELLQVTLSVDALDRQGTAEMMGLLVKLCVSFIMNLAISQHFLVILLIRAQYRIMNAKLRMVIEESRRLSFLQLRNGAFMTRCCYLSDQLEDIGEVQSQLQSMVGQLDEVFGMQGLMAYSEYYLSIVGTSYMSYSIYKYGPHNLKLSAKTSIIVCILITLFYLDALVNCNNMLRVLDHHKDFLGLLEERTVFASSLDIRLEESFESLQLQLARNPLKINVMGMFPITRGSTAAMCASVIVNSIFLIQFDMEFF
DmelGR47a	MAFTSSQLCSLLTKFTALNGLNTYYFDTKTNAFRVSSKLKIYCAIHHALCVLALAHMSYSTASNLRVSVTVLTIGGTMACCVKSCWEKAQGIRNLARGLVTMEQKYFAGRPSGLLLKCRYYIKITFGSITLLRIHLIQPIYMRRLLPSQFYLNVGAYWLLYNMLLAAVLGFYFLLWEMCRIQKLINDQMTLILARSGQRNRLKKMQHCLRLYSKLLLLCDQFNSQLGHVAIWVLACKSWCQITFGYEIFQMVAAPKSIDLTMSMRVFVIFTYIFDAMNLFLGTDISELFSTFRADSQRILRETSRLDRLLSMFALKLALHPKRVVLLNVFTFDRKLTLTLLAKSTLYTICCLQNDYNKLKA
DmelGR47b	MQRDDGFVYCYGNLYSLLLYWGLVTIRVRSPDRGGAFSNRWTVCYALFTRSFMVICFMATVMTKLRDPEMSAAMFGHLSPLVKAIFTWECLSCSVTYIEYCLSLDLQKDRHLKLVARMQEFDRSVLMVFPHVQWNYRRARLKYWYGTVIVGFCFFSFSISLIFDTTRCTCGIPSTLLMAFTYTLLTSSVGLLGFVHIGIMDFIRVRLRLVQQLLHQLYQADDSSEVHERIAYLFEMSKRCSFLLAELNGVFGFAAAAGIFYDFTIMTCFVYVICQKLLEREPWDPEYVYMLLHVAIHTYKVVITSTYGYLLLREKRNCMHLLSQYSRYFSGQDVARRKTEDFQHWRMHNRQAAMVGSTTLLSVSTIYLVYNGMANYVIILVQLLFQQQQIKDHQLTSGK…
DmelGR43a	MEISQPSIGIFYISKVLALAPYATVRNSKGRVEIGRSWLFTVYSATLTVVMVFLTYRGLLFDANSEIPVRMKSATSKVVTALDVSVVVMAIVSGVYCGLFSLNDTLELNDRLNKIDNTLNAYNNFRRDRWRALGMAAVSLLAISILVGLDVGTWMRIAQDMNIAQSDTELNVHWYIPFYSLYFILTGLQVNIANTAYGLGRRFGRLNRMLSSSFLAENNATSAIKPQKVSTVKNVSVNRPAMPSALHASLTKLNGETLPSEAAAKNKGLLLKSLADSHESLGKCVHLLSNSFGIAVLFILVSCLLHLVATAYFLFLELLSKRDNGYLWVQMLWICFHFLRLLMVVEPCHLAARESRKTIQIVCEIERKVHEPILAEAVKKFWQQLLVVDADFSACGLCR…
DmelGR59b	MVYWMIKLYFRYSLAIGITSQQFSNRKFFSTLFSRTYALIANIVTLIMLPIVMWQVQLVFQQKKTFPKLILITNNVREAVSFLVILYTVLSRGFRDTAFKEMQPLLLTLFREEKRCGFKGIGGVRRSLRILLFVKFFTLSWLCVTDVLFLLYSTDALIWVNVLRFFFKCNTNNILEMVPMGYFLALWHIARGFDCVNRRLDQIVKSKSTRKHRELQHLWLLHACLTKTALNINKIYAPQMLASRFDNFVNGVIQAYWGAVFTFDLSTPFFWVVYGSVQYHVRCLDYYLIDNMCDVAVEYHDSAKHSWSEVRWTKEISSYVIYANSTKLQLWSCGLFQANRSMWFAMISSVLYYILVLLQFHLVMRK
DmelGR58a	MLLKFMYIYGIGCGLMPAPLKKGQFLLGYKQRWYLIYTACLHGGLLTVLPFTFPHYMYDDSYMSSNPVLKWTFNLTNITRIMAMFSGVLLMWFRRKRILNLGENLILHCLKCKTLDNRSKKYSKLRKRVRNVLFQMLLVANLSILLGALILFRIHSVQRISKTAMIVAHITQFIYVVFMMTGICVILLVLHWQSERLQIALKDLCSFLNHEERNSLTLSENKANRSLGKLAKLFKLFAENQRLVREVFRTFDLPIALLLLKMFVTNVNLVYHGVQFGNDTIETSSYTRIVGQWVVISHYWSAVLLMNVVDDVTRRSDLKMGDLLREFSHLELVKRDFHLQLELFSDHLRCHPSTYKVCGLFIFNKQTSLAYFFYVLVQVLVLVQFDLKNKVEKRN
DmelGR59d	MADLLKLCLRIAYAYGRLTGVINFKIDLKTGQALVTRGATLISVSTHLLIFALLLYQTMRKSVVNVMWKYANSLHEYVFLVIAGFRVVCVFLELVSRWSQRRTFVRLFNSFRRLYQRNPDIIQYCRRSIVSKFFCVTMTETLHIIVTLAMMRNRLSIALALRIWAVLSLTAIINVIITQYYVATACVRGRYALLNKDLQAIVTESQSLVPNGGGVFVTKCCYLADRLERIAKSQSDLQELVENLSTAYEGEVVCLVITYYLNMLGTSYLLFSISKYGNFGNNLLVIITLCGIVYFVFYVVDCWINAFNVFYLLDAHDKMVKLLNKRTLFQPGLDHRLEMVFENFALNLVRNPLKLHMYGLFEFGRGTSFAVFNSLLTHSLLLIQYDVQNF
DmelGR58b	MLHPKLGRVMNVVYYHSVVFALMSTTLRIRSCRKCLRLEKVSRTYTIYSFFVGIFLFLNLYFMVPRIMEDGYMKYNIVLQWNFFVMLFLRAIAVVSCYGTLWLKRHKIIQLYKYSLIYWKRFGHITRAIVDKKELLDLQESLARIMIRKIILLYSAFLCSTVLQYQLLSVINPQIFLAFCARLTHFLHFLCVKMGFFGVLVLLNHQFLVIHLAINALHGRKARKKWKALRSVAAMHLKTLRLARRIFDMFDIANATVFINMFMTAINILYHAVQYSNSSIKSNGWGILFGNGLIVFNFWGTMALMEMLDSVVTSCNNTGQQLRQLSDLPKVGPKMQRELDVFTMQLRQNRLVYKICGIVELDKPACLSYIGSILSNVIILMQFDLRRQRQPINDRQYLI…
DmelGR59e	MDSSYWENLLLTINRFLGVYPSGRVGVLRWLHTLWSLFLLMYIWTGSIVKCLEFTVEIPTIEKLLYLMEFPGNMATIAILVYYAVLNRPLAHGAELQIERIITGLKGKAKRLVYKRHGQRTLHLMATTLVFHGLCVLVDVVNYDFEFWTTWSSNSVYNLPGLMMSLGVLQYAQPVHFLWLVMDQMRMCLKELKLLQRPPQGSTKLDACYESAFAVLVDAGGGSALMIEEMRYTCNLIEQVHSQFLLRFGLYLVLNLLNSLVSICVELYLIFNFFETPLWEESVLLVYRLLWLAMHGGRIWFILSVNEQILEQKCNLCQLLNELEVCSSRLQRTINRFLLQLQRSIDQPLEACGIVTLDTRSLGGFIGVLMAIVIFLIQIGLGNKSLMGVALNRSNWVYV
DmelGR59f	MRSSATKGAKLKNSPRERLSSFNPQYAERYKELYRTLFWLLLISVLANTAPITILPGCPNRFYRLVHLSWMILWYGLFVLGSYWEFVLVTTQRVSLDRYLNAIESAIYVVHIFSIMLLTWQCRNWAPKLMTNIVTSDLNRAYTIDCNRTKRFIRLQLFLVGIFACLAIFFNIWTHKFVVYRSILSINSYVMPNIISSISFAQYYLLLQGIAWRQRRLTEGLERELTHLHSPRISEVQKIRMHHANLIDFTKAVNRTFQYSILLLFVGCFLNFNLVLFLVYQGIENPSMADFTKWVCMLLWLAMHVGKVCSILHFNQSIQNEHSTCLTLLSRVSYARKDIQDTITHFIIQMRTNVRQHVVCGVINLDLKFLTTLLVASADFFIFLLQYDVTYEALSKSVQ…
DmelGR58c	MNQYFLLHTYFQVSRLIGLCNLHYDSSNHRFILNHVPTVVYCVILNVVYLLVLPFALFVLTGNIYHCPDAGMFGVVYNVVALTKLLTMLFLMSSVWIQRRRLYKLGNDLMKMLHKFRFNLGNDCRNRCLCKGLLTSSRFVLLTQQLLTRDSVVNCESNSSLRQAMVPYQSAAIVYALIMILLMSYVDMTVYMVEVAGNWLLVNMTQGVREMVQDLEVLPERNGIPREMGLMQILAAWRKLWRRCRRLDALLKQFVDIFQWQVLFNLLTTYIFSIAVLFRLWIYLEFDKNFHLWKGILYAIIFLTHHVEIVMQFSIFEINRCKWLGLLEDVGNLWDINYSGRQCIKSSGTILSRKLEFSLLYMNRKLQLNPKRVRRLHIVGLFDLSNLTVHNMTRSIITN…
DmelGR59c	MVDLVKTILLIAYWYGLAVGVSNFEVDWLTGEAIATRRTTIYAAVHNASLITLLILFNLGNNSLKSEFISARYLHEYFFMLMTAVRISAVLLSLITRWYQRSRFIRIWNQILALVRDRPQVVRGRWYRRSIILKFVFCVLSDSLHTISDVSAQRKRITADLIVKLSLLATLTTIFNMIVCQYYLAMVQVIGLYKILLQDLRCLVRQAECICSIRNRRGGVYSIQCCSLADQLDLIAERHYFLKDRLDEMSDLFQIQSLSMSLVYFFSTMGSIYFSVCSILYSSTGFGSTYWGLLLIVLSTASFYMDNWLSVNIGFHIRDQQDELFRVLADRTLFYRELDNRLEAAFENFQLQLASNRHEFYVMGLFKMERGRLIAMLSSVITHTMVLVQWEIQNDES
DmelGR57a	MAVLYFFREPETVFDCAAFICILQFLMGCNGFGIRRSTFRISWASRIYSMSVAIAAFCCLFGSLSVLLAEEDIRERLAKADNLVLSISALELLMSTLVFGVTVISLQVFARRHLGIYQRLAALDARLMSDFGANLNYRKMLRKNIAVLGIVTTIYLMAINSAAVQVASGHRALFLLFALCYTIVTGGPHFTGYVHMTLAEMLGIRFRLLQQLLQPEFLNWRFPQLHVQELRIRQVVSMIQELHYLIQEINRVYALSLWAAMAHDLAMSTSELYILFGQSVGIGQQNEEENGSCYRMLGYLALVMIPPLYKLLIAPFYCDRTIYEARRCLRLVEKLDDWFPQKSSLRPLVESLMSWRIQAKIQFTSGLDVVLSRKVIGLFTSILVNYLLILIQFAMTQKM…
DmelGR59a	MKRIGQAYNVYAVFIGMTSYETMGGKFRQSRITRIYCLLINAIFLTLLPSAFWKSAKLLSTADWMPSYMRVTPYIMCTINYAAIAYTLISRCYRDAMLMDLQRIVLEVNREMLRTGKKMNSLLRRMFFLKTFTLTYSCLSYILAVFIYQWKAQNWSNLCNGLLVNISLTILFVNTFFYFTSLWHIARGYDFVNQQLNEIVACQSMDLERKSKELRGLWALHRNLSYTARRINKHYGPQMLAMRFDYFIFSIINACIGTIYSTTDQEPSLEKIFGSLIYWVRSFDFFLNDYICDLVSEYQMQPKFFAPESSMSNELSSYLIYESSTRLDLLVCGLYRVNKRKWLQMVGSIVVHSSMLFQFHLVMRGGL
DmelGR61a	MSRTSDDIRKHLKVRRQKQRAILAMRWRCAQGGLEFEQLDTFYGAIRPYLCVAQFFGIMPLSNIRSRDPQDVKFKVRSIGLAVTGLFLLLGGMKTLVGANILFTEGLNAKNIVGLVFLIVGMVNWLNFVGFARSWSHIMLPWSSVDILMLFPPYKRGKRSLRSKVNVLALSVVVLAVGDHMLYYASGYCSYSMHILQCHTNHSRITFGLYLEKEFSDIMFIMPFNIFSMCYGFWLNGAFTFLWNFMDIFIVMTSIGLAQRFQQFAARVGALEGRHVPEALWYDIRRDHIRLCELASLVEASMSNIVFVSCANNVYVICNQALAIFTKLRHPINYVYFWYSLIFLLARTSLVFMTASKIHDASLLPLRSLYLVPSDGWTQEVQRFADQLTSEFVGLSGYR…
DmelGR66a	MAQAEDAVQPLLQQFQQLFFISKIAGILPQDLEKFRSRNLLEKSRNGMIYMLSTLILYVVLYNILIYSFGEEDRSLKASQSTLTFVIGLFLTYIGLIMMVSDQLTALRNQGRIGELYERIRLVDERLYKEGCVMDNSTIGRRIRIMLIMTVIFELSILVSTYVKLVDYSQWMSLLWIVSAIPTFINTLDKIWFAVSLYALKERFEAINATLEELVDTHEKHKLWLRGNQEVPPPLDSSQPPQYDSNLEYLYKELGGMDIGSIGKSSVSGSGKNKVAPVAHSMNSFGEAIDAASRKPPPPPLATNMVHESELGNAAKVEEKLNNLCQVHDEICEIGKALNELWSYPILSLMAYGFLIFTAQLYFLYCATQYQSIPSLFRSAKNPFITVIVLSYTSGKCVY…
DmelGR63a	MANYYRRKKGDAVFLNAKPLNSANAQAYLYGVRKYSIGLAERLDADYEAPPLDRKKSSDSTASNNPEFKPSVFYRNIDPINWFLRIIGVLPIVRHGPARAKFEMNSASFIYSVVFFVLLACYVGYVANNRIHIVRSLSGPFEEAVIAYLFLVNILPIMIIPILWYEARKIAKLFNDWDDFEVLYYQISGHSLPLKLRQKAVYIAIVLPILSVLSVVITHVTMSDLNINQVVPYCILDNLTAMLGAWWFLICEAMSITAHLLAERFQKALKHIGPAAMVADYRVLWLRLSKLTRDTGNALCYTFVFMSLYLFFIITLSIYGLMSQLSEGFGIKDIGLTITALWNIGLLFYICDEAHYASVNVRTNFQKKLLMVELNWMNSDAQTEINMFLRATEMNPSTI…
DmelGR 64e	MARTTGDPAKRRRCMSRIKFWRRSRVGSEVVEKDTKRFKLSLIKAWLLRIRQEDYKYSGSFQEAIKPVLIIAQIFALMPVRKVSSKFAEDLTFTWFSVRSYYALVTILFFGVSSGYMVAFVTSVSFNFDSVETLVFYLSIFLISLSFFQLARKWPEIAQSWQLVEAKLPPLKLPKERRSLAQHINMITIVATTCSLVEHIMSMLSMGYYVNSCPRWPDRPIDSFLYLSFSSVFYFVDYTRFLGIVGKVVNVLSTFAWNFNDIFVMAVSVALAARFRQLNDYMMREARLPTTVDYWMQCRINFRNLCKLCEEVDDAISTITLLCFSNNLYFICGKILKSMQAKPSIWHALYFWFSLVYLLGRTLILSLYSSSINDESKRPLVIFRLVPREYWCDELKRFS…
DmelGR64f	MKILPKLERKLRRLKKRVTRTSLFRKLDLVHESARKKAFQESCETYKNQIENEYEIRNSLPKLSRSDKEAFLSDGSFHQAVGRVLLVAEFFAMMPVKGVTGKHPSDLSFSWRNIRTCFSLLFIASSLANFGLSLFKVLNNPISFNSIKPIIFRGSVLLVLIVALNLARQWPQLMMYWHTVEKDLPQYKTQLTKWKMGHTISMVMLLGMMLSFAEHILSMVSAINYASFCNRTADPIQNYFLRTNDEIFFVTSYSTTLALWGKFQNVFSTFIWNYMDLFVMIVSIGLASKFRQLNDDLRNFKGMNMAPSYWSERRIQYRNICILCDKMDDAISLITMVSFSNNLYFICVQLLRSLNTMPSVAHAVYFYFSLIFLIGRTLAVSLYSSSVHDESRLTLRYLR…
DmelGR68a	MKIYQDIYPISKPSQIFAILPFYSGDVDDGFRFGGLGRWYGRLVALIILIGSLTLGEDVLFASKEYRLVASAQGDTEEINRTIETLLCIISYTMVVLSSVQNASRHFRTLHDIAKIDEYLLANGFRETYSCRNLTILVTSAAGGVLAVAFYYIHYRSGIGAKRQIILLLIYFLQLLYSTLLALYLRTLMMNLAQRIGFLNQKLDTFNLQDCGHMENWRELSNLIEVLCKFRYITENINCVAGVSLLFYFGFSFYTVTNQSYLAFATLTAGSLSSKTEVADTIGLSCIWVLAETITMIVICSACDGLASEVNGTAQILARIYGKSKQFQNLIDKFLTKSIKQDLQFTAYGFFSIDNSTLFKIFSAVTTYLVILIQFKQLEDSKVEDISQA
DmelGR64a	MKGPNLNFRKTPSKDNGVKQVESLARPETPPPKFVEDSNLEFNVLASEKLPNYTNLDLFHRAVFPFMFLAQCVAIMPLVGIRESNPRRVRFAYKSIPMFVTLIFMIATSILFLSMFTHLLKIGITAKNFVGLVFFGCVLSAYVVFIRLAKKWPAVVRIWTRTEIPFTKPPYEIPKRNLSRRVQLAALAIIGLSLGEHALYQVSAILSYTRRIQMCANITTVPSFNNYMQTNYDYVFQLLPYSPIIAVLILLINGACTFVWNYMDLFIMMISKGLSYRFEQITTRIRKLEHEEVCESVFIQIREHYVKMCELLEFVDSAMSSLILLSCVNNLYFVCYQLLNVFNKLRWPINYIYFWYSLLYLIGRTAFVFLTAADINEESKRGLGVLRRVSSRSWCVEVE…
DmelGR64d	MLSTKIVLNDGLQLYTMGSLSFSVICIFCFGSFIKLSRRWPHIIRETALCERIFLKPCYANQEGLNFTRFLRRWALILLVAALCEHLTYVGSAAWSNYVQIRDCNLKVGFVENYFLRERQELFSVFEYRAWMVFFIEWNTMAMTFVWNFGDIFLFLMCRGLKIRFQQLHWRIRQNLGKPMAKEFWQEIRSDFLDLDSLLKLYDKELSGLILVCCAHNMYFICVQVYHSFQVKGAFMDELYFWFCLLYVISRLMNMMLAASSIPQEIKDISNTLYEVRSSPWCDELGRLSEMLRNETFALSGMGYFYVTRRLIFAMAGALMGYELVLFRQMQGAVVQKSICSRGPGSSMSIFFS
DmelGR64c	MQQSGQKGTRNTLQHAIGPVLVIAQFFGVLPVAGVWPSCRPERVRFRWISLSLLAALILFVFSIVDCALSSKVVFDHGLKIYTIGSLSFSVICIFCFGVFLLLSRRWPYIIRRTAECEQIFLEPEYDCSYGRGYSSRLRLWGVCMLVAALCEHSTYVGSALYNNHLAIVECKLDANFWQNYFQRERQQLFLIMHFTAWWIPFIEWTTLSMTFVWNFVDIFLILICRGMQMRFQQMHWRIRQHVRQQMPNEFWQRIRCDLLDLSDLLGIYDKELSGLIVLSCAHNMYFVCVQIYHSFQSKGNYADELYFWFCLSYVIIRVLNMMFAASSIPQEAKEISYTLYEIPTEFWCVELRRLNEIFLSDHFALSGKGYFLLTRRLIFAMAATLMVYELVLINQMAG…
DmelGR64b	MPQGETFHRAVSNVLFISQIYGLLPVSNVRALDVADIRFRWCSPRILYSLLIGILNLSEFGAVINYVIKVTINFHTSSTLSLYIVCLLEHLFFWRLAIQWPRIMRTWHGVEQLFLRVPYRFYGEYRIKRRIYIVFTIVMSSALVEHCLLLGNSFHLSNMERTQCKINVTYFESIYKWERPHLYMILPYHFWMLPILEWVNQTIAYPRSFTDCFIMCIGIGLAARFHQLYRRIAAVHRKVMPAVFWTEVREHYLALKRLVHLLDAAIAPLVLLAFGNNMSFICFQLFNSFKNIGVDFLVMLAFWYSLGFAVVRTLLTIFVASSINDYERKIVTALRDVPSRAWSIEVQRFSEQLGNDTTALSGSGFFYLTRSLVLAMGTTIITYELMISDVINQGSIRQK…
DmelGR77a	MPLPLGDPLALAVSPQLGYIRITAMPRWLQLPGMSALGILYSLTRVFGLMATANWSPRGIKRVRQSLYLRIHGCVMLIFVGCFSPFAFWCIFQRMAFLRQNRILLMIGFNRYVLLLVCAFMTLWIHCFKQAEIIGCLNRLLKCRRRLRRLMHTRKLKDSMDCLATKGHLLEVVVLLSSYLLSMAQPIQILKDDPEVRRNFMYACSLVFVSVCQAILQLSLGMYTMAILFLGHLVRHSNLLLAKILADAEHIFESSQKAGFWPNRQELYKGQQKWLALELWRLLHVHHQLLKLHRSICSLCAVQAVCFLGFVPLECTIHLFFTYFMKYSKFILRKYGRSFPLNYFAIAFLVGLFTNLLLVILPTYYSERRFNCTREIIKGGGLAFPSRITVKQLRHTMHF…
DmelGR89a	MLRFPHVCGLCLLLKYWQILALAPFRTSEPMVARCQRWMTLIAVFRWLLLTSMAPFVLWKSAAMYEATNVRHSMVFKTIALATMTGDVCISLALLGNHLWNRRELANLVNDLARLHRRRRLSWWSTLFLWLKLLLSLYDLLCSVPFLKGAGGRLPWSQLVAYGVQLYFQHVASVYGNGIFGGILLMLECYNQLEREEPTNLARLLQKEYSWLRLIQRFVKLFQLGIFLLVLGSFVNIMVNIYAFMSYYVSLHGVPLTISNNCLVLAIQLYAVILAAHLCQVRSAKLRKKCLQLEYVPEGLTQEQAMASTPFPVLTPTGNVKFRILGVFILDNSFWLFLVSYAMNFIVVILQTSFEHINHGEI
DmelGR85a	MYSLIEAQLLGGKLVNRVMASLRRIIQRSLGYFCALNGILDFNTDIGTGNLRRYRVLFMYRLLHNFAVISLTLKFLFDFTDHFKYIESSTLITVNFFTYFTLVFFALLSSMGSCYQWQNRILAVLKELKHQRDLSRHMGYRVPRSKQNSIDYLLFALTVLLILRLSIHLATFTLSARMGFNHPCNCFLPECMIFSMNYLLFAILAEITRCWWSLQSGLKMVLLNRQLSTVAFNLWEIERLHTRFQCLIDLTSEVCSIFRYVTLAYMARNLWSGIVAGYLLVRFVIGNGLQDVELVYLVFSFITCIQPLMLSLLVNSMTSTTGSLVEVTRDILKISHKKSVNLERSIEWLSLQLTWQHTHVTIFGVFRINRSLAFRSASLILVHVLYMVQSDYISITN
DmelGR98c	MEMEAKRSRLLTTARPYLQVLSLFGLTPPAEFFTRTLRKRRRFCWMAGYSLYLIAILLMVFYEFHANIVSLHLEIYKFHVEDFSKVMGRTQKFLIVAIATCNQLNILLNYGRLGLIYDEIANLDLGIDKSSKNFCGKSHWWSFRLRLTLSIGLWMVIIIGVIPRLTLGRAGPFFHWVNQVLTQIILIMLQLKGPEYCLFVLLVYELILRTRHVLEQLKDDLEDFDCGARIQELCVTLKQNQLLIGRIWRLVDEIGAYFRWSMTLLFLYNGLTILHVVNWAIIRSIDPNDCCQLNRLGSITFLSFNLLLTCFFSECCVKTYNSISYILHQIGCLPTAEEFQMLKMGLKEYILQMQHLKLLFTCGGLFDINIKLFGGMLVTLCGYVIIIVQFKIQDFALIG…
DmelGR93b	MSGLLVMPRILRCLNVSRISAILLRSCFLYGTFFGVITFRIERKDSQLVAINRRGYLWICLVIRLLASCFYGYSYDAWSGQYEDMYLRAFFGFRLIGCLICSVIILVMQFWFGEELINLVNRFLQLFRRMQSLTNSPKNRFGDRAEFLLMFSKVFSLLFVFMAFRLMLSPWFLLTLVCDLYTSVGTGMITHLCFVGYLSIGVLYRDLNNYVDCQLRAQLRSLNGENNSFRNNPQPTRQAISNLDKCLYLYDEIHQVSRSFQQLFDLPLFLSLAQSLLAMSMVSYHAILRRQYSFNLWGLVIKLLIDVVLLTMSVHSAVNGSRLIRRLSFENFYVTDSQSYHQKLELFLGRLQHQELRVFPLGLFEVSNELTLFFLSAMVTYLVFLVQYGMQSQQI
DmelGR92a	MFEFLHQMSAPKLSTSILRYIFRYAQFIGVIFFCLHTRKDDKTVFIRNWLKWLNVTHRIITFTRFFWVYIASISIKTNRVLQVLHGMRLVLSIPNVAVILCYHIFRGPEIIDLINQFLRLFRQVSDLFKTKTPGFGGRRELILILLNLISFAHEQTYLWFTIRKGFSWRFLIDWWCDFYLVSATNIFIHINSIGYLSLGVLYSELNKYVYTNLRIQLQKLNTSGSKQKIRRVQNRLEKCISLYREIYHTSIMFHKLFVPLLFLALIYKVLLIALIGFNVAVEFYLNSFIFWILLGKHVLDLFLVTVSVEGAVNQFLNIGMQFGNVGDLSKFQTTLDTLFLHLRLGHFRVSILGLFDVTQMQYLQFLSALLSGLAFIAQYRMQVGNG
DmelGR97a	MRFLRRQTRRLRSIWQRSLPVRFRRGKLHTQLVTICLYATVFLNILYGVYLGRFSFRRKKFVFSKGLTIYSLFVATFFALFYIWNIYNEISTGQINLRDTIGIYCYMNVCVCLFNYVTQWEKTLQIIRFQNSVPLFKVLDSLDISAMIVWRAFIYGLLKIVFCPLITYITLILYHRRSISESQWTSVTTTKTMLPLIVSNQINNCFFGGLVLANLIFAAVNRKLHGIVKEANMLQSPVQMNLHKPYYRMRRFCELADLLDELARKYGFTASRSKNYLRFTDWSMVLSMLMNLLGITMGCYNQYLAIADHYINEEPFDLFLAIVLVVFLAVPFLELVMVARISNQTLTRRTGELLQRFDLQHADARFKQVVNAFWLQVVTINYKLMPLGLLELNTSLVNK…
DmelGR98d	MEANRSRLLAAARPYIQIYSIFGLTPPIQFFTRTLHKRRRGIVILGYACYLISISLMVIYECYANIVALQKDIHKFHAEDSSKVMGNTQKVLVVAMFVWNQLNILLNFRRLARIYDDIADLEIDLNNASSGFVGQRHWWRFRFRLALSVGLWIVLLVGLTPRFTLVALGPYLHWTNKVLTEIILIMLQLKCTEYCVFVLLIYELILRGRHILQQISVELEGNQSRDSVQELCVALKRNQLLAGRIWGLVNEVSLYFTLSLTLLFLYNELTILQIVNWALIKSVNPNECCQYRRVGTCLLLSINIFLSCLYSEFCIQTYNSISRVLHQMYCLSAAEDYLILKMGLREYSLQMEHLKLIFTCGGLFDINLKFFGGMVVTLFGYIIILVQFKIQFFAQSNFM…
DmelGR98b	MVAQKSRLLARAFPYLDIFSVFALTPPPQSFGHTPHRRLRWYLMTGYVFYATAILATVFIVSYFNIIAIDEEVLEYNVSDFTRVMGNIQKSLYSIMAIANHLNMLINYRRLGGIYKDIADLEMDMDEASQCFGGQRQRFSFRFRMALCVGVWMILMVGSMPRLTMTAMGPFVSTLLKILTEFVMIMQQLKSLEYCVFVLIIYELVLRLRRTLSQLQEEFQDCEQQDMLQALCVALKRNQLLLGRIWRLEGDVGSYFTPTMLLLFLYNGLTILHMVNWAYINKFLYDSCCQYERFLVCSTLLVNLLLPCLLSQRCINAYNCFPRILHKIRCTSADPNFAMLTRGLREYSLQMEHLKLRFTCGGLFDINLKYFGGLLVTIFGYIIILIQFKVQAIAANRYK…
DmelGR98a	MEQMSGELHAASLLYMRRLMKCLGMLPFGQNLFSKGFCYVLLFVSLGFSSYWRFSFDYEFDYDFLNDRFSSTIDLSNFVALVLGHAIIVLELLWGNCSKDVDRQLQAIHSQIKLQLGTSNSTDRVRRYCNWIYGSLIIRWLIFIVVTIYSNRALTINATYSELVFLARFSEFTLYCAVILFIYQELIVGGSNVLDELYRTRYEMWSIRRLSLQKLAKLQAIHNSLWQAIRCLECYFQLSLITLLMKFFIDTSALPYWLYLSRVEHTRVAVQHYVATVECIKLLEIVVPCYLCTRCDAMQRKFLSMFYTVTTDRRSSQLNAALRSLNLQLSQEKYKFSAGGMVDINTEMLGKFFFGMISYIVICIQFSINFRAKKMSNEQMSQNITSTSAPI
DmelGR94a	MDFTSDYAHRRMVKFLTIILIGFMTVFGLLANRYRAGRRERFRFSKANLAFASLWAIAFSLVYGRQIYKEYQEGQINLKDATTLYSYMNITVAVINYVSQMIISDHVAKVLSKVPFFDTLKEFRLDSRSLYISIVLALVKTVAFPLTIEVAFILQQRRQHPEMSLIWTLYRLFPLIISNFLNNCYFGAMVVVKEILYALNRRLEAQLQEVNLLQRKDQLKLYTKYYRMQRFCALADELDQLAYRYRLIYVHSGKYLTPMSLSMILSLICHLLGITVGFYSLYYAIADTLIMGKPYDGLGSLINLVFLSISLAEITLLTHLCNHLLVATRRSAVILQEMNLQHADSRYRQAVHGFTLLVTVTKYQIKPLGLYELDMRLISNVFSAVASFLLILVQADLSQ…
DmelGR93d	MKATKYSVGILRFMSFYARFLSLVCFRLRKQKDNNVWLEEIWSNRSRWKWISVTLRIVPLCIYAFTYAEWISNRMLITEKFLHSCSLVVSIPCYLSIIHLKICHGPEVTKLVNQYLHIFRLGTLDIRRRSQFGGGRELFLLILSVCCQIHEYVFILVIASRLCGFQHIIWWVSYTYVFIICNSIMCFGFIWHLSLGVLYAELNDNLRFESGFQTAFLRKQQRIRVQKSMALFKEISSVVTSLQDIFNVHLFLSALLTLLQVLVVWYKMIIDLGFSDFRIWSFSLKNLIQTLLPVLAIQEAANQFKQTRERALDIFLVGKSKHWMKSVEIFVTHLNLSEFRVNLLGLFNVSNELFLIIVSAMFCYLVFVTQCVIVYRRRYVI
DmelGR93c	MIERLKKVSLPALSAFILFCSCHYGRILGVICFDIGQRTSDDSLVVRNRHQFKWFCLSCRLISVTAVCCFCAPYVADIEDPYERLLQCFRLSASLICGICIIVVQVCYEKELLRMIISFLRLFRRVRRLSSLKRIGFGGKREFFLLLFKFICLVYELYSEICQLWHLPDSLSLFATLCEIFLEIGSLMIIHIGFVGYLSVAALYSEVNSFARIELRRQLRSLERPVGGPVGRKQLRIVEYRVDECISVYDEIERVGRTFHRLLELPVLIILLGKIFATTILSYEVIIRPELYARKIGMWGLVVKSFADVILLTLAVHEAVSSSRMMRRLSLENFPITDHKAWHMKWEMFLSRLNFFEFRVRPLGLFEVSNEVILLFLSSMITYFTYVVQYGIQTNRL
DmelGR93a	MFSSSSAMTGKRAESWSRLLLLWLYRCARGLLVLSSSLDRDKLQLKATKQGSRNRFLHILWRCIVVMIYAGLWPMLTSAVIGKRLESYADVLALAQSMSVSILAVISFVIQARGENQFREVLNRYLALYQRICLTTRLRHLFPTKFVVFFLLKLFFTLCGCFHEIIPLFENSHFDDISQMVGTGFGIYMWLGTLCVLDACFLGFLVSGILYEHMANNIIAMLKRMEPIESQDERYRMTKYRRMQLLCDFADELDECAAIYSELYHVTNSFRRILQWQILFYIYLNFINICLMLYQYILHFLNDDEVVFVSIVMAFVKLANLVLLMMCADYTVRQSEVPKKLPLDIVCSDMDERWDKSVETFLGQLQTQRLEIKVLGFFHLNNEFILLILSAIISYLFIL…
HhalIR116	VISDGSDFGDRLLRGIHHSSKPLVNSFQHVCSGFYLIAEDLSELESLLSKLKRWARHRILCVLPAIAEQEFQNFLQTKVSLFRDAEVLVARTESPIGFQLTYTLRRFTPIMYHGVRWLRETGKGKQNFHGREIKVATFNCSTFSRINYPYLAGSEMAIFLEVVRRLNLTYKFIVPIGSRFPLGVLKDGLWHGGLLGLLASDEADVGFCGLWIANNKINTGVEMSVSLKRICMMYLVPRPVSINSEWYGIFSPYTTNLWLAIIVAYLSVSLLLPTLAYMDSLISVFGECRYLSFERSWILLAGMLLQGNWMRSTHSQGPCRHLIAWWTVFSLLIGSVFSGSLASYLTRAGYTWKPETIEDLLQTDYSWTTTRVPVVGTLFNLNDPVHQEWMRRIRVVRTQ…
HhalIR117	MTTQPALPMDPWTRVLLLLAVTGGSWGRKRGISDMAKRINEDNKHLNHSDAQIHRLFNYVMPDMRCYQVETDGTAFGQSFQEDLHQSNAVPTLVTGGSWSVVEGCKGFVIIATFFSSVIPIVQKMPRWAEHRILVILKGTGANTLLVPIMVDMRIFRDAEVAIVSSSDLTFGYRLTWTERYYVSFRSEPNATWKRLKEGPNDFLGREIWVQTSSCSMFSQIGPINAKGQPAWTGGAEMIMFQDIAERLKLRPRFNYTKFLHAGWFKEPLTSENKSDVAFCGILVSSRTLELKNIKVSQPLALLCLKLLVPRPQRVSDQWDEIFEPFSPGLWLLIATVTFFTTFLLQRFTTVTRRLVFTKRIKKYELLGESFLQIVAILVLSDVPRSGKEQGAIRHILTW…
HhalIR76b	MAGIELWKSITRTEVGEADIAEGRLPAMQGLYYLLLALCSNYPPPPSEAEFTCKLRKGHPEKEILKGRTLKIVTYDDRPFSGATANASGALEGHGLVFEVLETLQEKFGFEYELQKEKRLMGDETSGLLGMLVAKDVDMIAAFLPILPGTHNYVTWGTQLWQAHYYVLMKRPDDSATGSGLLAPFDDKVWILILISLTSVGPIIYLIMWLRIKLCPNDNKQLFPLSSCIWFVYGALMKQGSTLSPLSDSARLLFATWWIFILILTAFYTANLTAFLTLSLFTLPIKEVEDVAKPPHKWFTTEGSSVEYAIKNKDDGDLNVLLSSVRRGNGRFIDTSSENHVLEMLYDGWLYLDTSDTLNRLMFDDYKRKTIEGEDENKRCSFALTQYPFLVRSLAFAYP…
HhalIR110	MFWLVFCVVGIEAIIYNDVQYQPDIVDCVTAITDQFLDSHCLAFLFPMNYTQPSVTNVPPLVRSPLLKNIHEKSATYLPATNYHRIINLLYDPPLGAVNYLRCAHIVILDEQNSYEIQINDILYTFYNNHYKDGGGKETKMIIVSTKEVNESDIHSIHFKMFTMGDIDVVFLAPKNNILTLFTWFPFGRNGFSCPERNNDIEILNKWENGKFSNDTNLFPKRVPKLFNGCKMKVSVAHYPPLMIFDDNGNPSDGVEYRIIEIIAKGIGLEIDYVTHYDWVWSDGKTVHGAAVDVLRGTVWMMATAGTNTDHSFSCTIVSSPYMTGEIAWFFQDPVAVPTWKLIYMGFDGVLWTLVILTIVMFAFVIYLFAKYDRNTMSLDSISSCMLASWSFNLGTSSI…
HhalIR107	MSFWTNCKTNKAYKLVLSSISTNWDILTMYPLYLGYFRSHYKIISISSIDENQFSSRNRCYELSAYNFPSDAMFLHVVMVTFLTKCGFGAIPFQYSFEQYPALSDCLLKILEDEIRTKNIVFLKEEVQEYKPVESLLKLNWDRIIVSSYNVSSVSGLFLFLPNINTTISYEKIMRLKHNDYNSKYIICTDNTRNILNLFEVAWENQVIDVIALLPSKITGRISVYTYFPFGPFGCSTTDPVRINIYEPIENSFELNETVFSKAKKLNNLYKCPVRITVSEKPAEFIANDNTNSYNGVSLTLFSFLQQFMNFTPQIILIDHEANTYAAAYYNFTSAVVLSIVNGHADIGVGRFSQLVDYHNDIESPAQTSMDCFTWAVPMKAGTRPSVWTTSIYEFDYLM…
HhalIR75c	MVNYAFYFDIVNKYFNFLHIQSVVMLICPQEAVKVNVMKEMSDRSFLLSFSVDSIRDNPIIRTGTVLDISCHNTSLILQMMSARKMFNSDMEWLLMEEVNTTESFQQTLQNDVLKDTLALPGSCVTLAQFSENERRVKFYEVYRTAIWEPMKFRFLTDYFMNGSKEFSFRRGYRSFEGVVLRTASAVLYPGLFLGWESQELKEVDTISKAGYAFMKDIADHLQYNYTLLFLDFYGYETNGSFNGIMGYMQRGDIDVAANGLMMNQERMPYVDFVGDILVLRSPLIFRQPSLSTVSNLFVLPFHKTVWMLTVVVTLLYSMALFLNLYLKMRLLRLKETDDSSVPEIISVIMAYVCGQGTGLELRPGAGRITLCILSVFCFFLSVSFSAKIVALLQSSATT…
HhalIR75a	MRKHLSLLLLAIIISSACSSVDLPINIIQDYFDVLRIKSVTMLLCSTSEMKTAILRQLSAEGFLVSFSLDTVDDLPITRSGGVLDLTCNFSLSVINQFTRDKTMGVHTEWLLLDDGSSLDVIKDAYILPGSFVTIAQILGEEVVYLDVYRTSPYRPLKYTVLDNQTLEQFIQLPDRPSRNDFEGISLLGAAVLYYPHMFCGFDCRDHPEVDTIAKTGFPISQHFQEQLNFTLTFQILNDYGWKTNNTFSGLMGLLQREEIDMGVIGIFMRPDRIGTVDFTGDTFEIKSLVIYKQPALSAVSNIFVLPFTRMVWVCCVALSVLTGIFLMADVATSFGNRQTFEESVTTSDVVTLIIGCICQQGTTLVPKTLSARIIIFLFSLCCLFFYTSYSANIVALLQ…
HhalIR102	MEDKNHMSSVIVIFHLVQFSLFTMRGPSVLTYAFLLCAPSAVSVLIESFNTPSPLYLNEKECEANIIKIINTVKSFITPLTSTVVFDLQEEFTNTLLHSLFFNLGSLHVSKSYRIPSNINIIFTESNLGSYRFEKGFWEPAYYYIIFMKNLTSDNEKFISELWDKYKVYNAFLATCYGDYLISYNPFLKEMEQLLITDLQTKKTLTKRFHNWKKAKFFFICPGELGDSGKGNATSKMRSYDESIMKVISDKLNVSPVFWGTGPKELFGGMDQNGTYLGTYRWLKNGSAYMTCGSHFLKWTSLVSDIPFSHYITMDKLCFTVPAVGQVPHFKALLRLINISVMASILIMFFITGFILRILRFTTSKTGLKKYIYSMNITLTIVSILLGMSFHSKIHLAFE…
HhalIR75g	MKLLRMIFFIFCYEGTWLSSHCYIPDGIHDVIDFYFRDLFGAHLYFCKLEDAVKAFKRFTSGGPKYNIRHNRDFREPHELLMSYWQPSRLGIFLDTSCDHGIFFFNYTTDLFNASYSWIVWSEEVNFTMFEDTRLSADSEVKVVKPGLEIYDIHRVHISSELKSKLVASWNATDALVQISPSMDRRDFGGFTFTASIMMIDIKFNESNLLEPLLDKTYEPGKDMVRRYGLAVFLHVAELYNFTYNYILTNAWGDPQPDGTWTGMVGQVARGEAEFGLAPAKYIVQRFEIIDFINSMHIVKCCFTFLQPKLFGSAKALVLPLDEIVWVCLAVLGILSVIVFRILAKYDNTGLSNDSWGGSALLVVGAISQQGIPDNTEKVSTRIVYIFLLIVSFFVAVYY…
HhalIR111	MRWELLTLITCVGSAMVDIFYPNRENLLDAVETIAEKNFHGNCLCFFYSRTNPPDLIFSNLILRMYKHWTPILPTILPSISFINKDHYVVTNFIKCSYVILIRNENYTSQLQEIMYHPWNTLYRIGDSPYSRFIIVVDGEVSMNETYEALKMMFRFGDIDVVLVGLENNIVSVFTLFPYGQDGKSCPEDNTEVFRIAQWNGKFSEIEIFPEKVPILFQGCDYPLSTVRYPPFMFSLGDNKYDGIDYRLLLMVTEKINASLMVIYYSGIDGWLWQKEDKVYGSLNDLREGISWATVSGVSNNLMHYPVMTIESPYVFSKLIWYFPNPLPIEKWKFVYLAFSGRLWVSGVITAVLTPFFFYLFAKVSRLEYYFIEFEKSCFTLWCIAFGNSTGFMPKTVYF…
HhalIR112	MKGELMLILVIRASCAMLNVFRSVKEDLLDAVESIAVKHFYGNYLCFFYPTRQPPPDLVFSNLLQRMHKHWTPIMPIFIPNAGALNSKGFTINFIKCSYLIPIHNKNYTSQLTEIAYSAWNNIYRSGDSPYTRFIVVVDGEVSMNEGYEALKMMFRFGDINAVIVGRERNVVSVFTLFPFGQDGKSCPGDNMQLSRIAQWNEKFTEVDFFPDKVPRILQGCDFPVSTVRYPPATFPLGEGKYDGFDIRLLGIVSENINASLIFTYYDRIDGWLWVDDKRNVKGSINDVREGISWATVSGIANNQWHHSVCIIQTPYVYAKLMWYFPNPLPIEKWKFVYLAFSKELWIAGVATAVLTPFFFYLFAKVSRIEYYFIEFEKSCFTLWSIAFGNSTGFMPKTV…
HhalIR113	MYRLFSFRYRERICFSLIALVRPPWSVMLLPGPVERLQWPGSEECALEIISKSRPPDVFVWNHSDYFIKSLFILNISVTITNRLYFFLRTRPQYLAVSGTVKQLQELNYLNVSYNPLSITALVDGSLEEAEKLIFMFWSRKIYNVNAILNGLLLRSVHVGCGNYGIVKQRSCQFFSEQYLPYTECVFGINYVGREPNFIGPPNDGIEYLLLKLILNVCGINDIIWQKEKNFGSLENGTWTDALGNLEDLAAGGFMVSANRLNDFLMTYPHYFEKYVWFSPVPAVDQLWVGMGVVDFGGHLLVFIFMCCCFSLFSEGERMFSTPSLCLLNVLRVVLGQPIRRTPKNSPVRIIFISWVWYEMVFNSVMSGTLIKSLYNRRKVEVPLRNLARMSCLIQVVDE…
HhalIR101	MRNFRRWNSIVLSRCPGMAGVALCLLLPAACCLTYPVCSNHSFDDHPLVSTASTLKSLLGSVHVTVTSTHDHQPETIKYLQDALGLIQISSLGGQSSKLTICLIRGSLDTIKTLKINFWNVEFYYLLYFVEYNPEVKNIFYYLWDIHRIHRVFVVFKKSDQIETFDPVLRKVQRTPIAVLFNINLLNRRLPDWNKTDFYTVYAGLYADKLKKSRSFLVDRLTLDAVTERLNMRLKIKNTTDDSIKFGFRSANGSFYGTFKELVNHRANMTAQAHFLKMPNILDSLTYSVYARADKICIAVPRTEQIPRFVESFKSFNITVWISILFIYVVTAVTLSFFRFFFRRVSRRMIYDTSLPLTMFGICLGFPVVYIPRMHFEKLILSSILLVSFVVVSVMQSTL…
HhalIR93a	MVKFILLQHLFISIVAYEYYYTPSDRKTTDNLLVIIDPNFLHPQYKGLNNNIRHMVSSIANKYLKGESLLITYTNNLNYRIKDDITAVFSVIHCEDIWDLFFEQQETSILFIAITEPNCPRLPKDFGITIPLYEPSLEFSQILIDLRTEDFLAWEAVNLIFDDSIDSKLIDNILEAQTKSIPLTRKSASVSLYRINGTVNKLIRKKEVLNVMQLIPRTEMFFNYLVVVNFELVPTILEIAKLIGLMSPRNRWLFVRLRSDDSKANNVKNYIHLLEEGENVAFLYNFTNINYSCNYSLYCQANELLDHLIVSLDRSMREEKLLSEQVSEEEWDLIRPTKSQRRNSIINFIKARQKDISWCDNCTWWRIISSETWGSDFLEKKELLESGDWSPRSGPVLVD…
HhalIR75i	MYRLVILLLIGSTHSLRYMNNTLEIITTYFNFRATNVINIYSCNHREGVWLLKHLNALGFMIQIKHHTFDEKEESRPPYVRGWFIDLNCTKNMNFFKTINGLDGIWLGYPVKSLDMNLTKIRLDSDVVLGTEDGLLWDLYNNTKRNLKVSSAGTWRPPKIFMPNSKHRYDLNGTVLKGVLLELELQFFKNNMTEKIGDYSYYPEWETSERLAYVYVQNLAQFYNFEIEIVPSETWGYVLPNGSFGGMVGVIERGYADLGLTACAMREDRMRAVNFVPQLQDLRFICLFMEERIRGTYSALILPFSFNVWLCIFVAIVIGAAIFSLVQNKDVTEGIIFVTAILSQQGLLHDKNRMSARVYSISLLFLGLVLYSYYSAAIMNGLLSPVPPSIHNELELQKS…
HhalIR118	MKLVPPLMTLFCTSSLPLDCASVILSVPEAQRLVPLVAPSFQRILIIAEKHHLVNIMIGLEGRRAVVIACGTNISYFKTEFEPQLNQVSIMELSKNLPGDKIDLRREVILTTFNCSIFAVLGPVTEDGHPEWFDGLELNAVATILEWRGLSWRVLLPWRGYGEVYLNGTIEGGGIKSFLAQALADIALCSIWITPNLFSTMRPTASDRFRLCSRILVPQPQASVTYWHSFFMTLPLTFWCIHIISALASAAIIHFCEINLSAYNSSNDAEKWIIKFGSSLYKAFTICFQGQLNGTFTRFGSKVLQLSWAVLVVIASSIFSSFLVARLTTPLLPNPVDSLEDMVRLGYKWTSGFGYVPSDNADAYFDLRGDVEREWFTTQVSTDEIIVGKTCLYAFDFES…
HhalIR41b	MRFHFIWLWFSSLCLEKCLSSSIIAINRTSVNSYLEVLANEIGEKYFSGHRCVVVMSDAGLLRNFKINTTVVHIEMNPTNESCVQEVADLLRITYQDNCDGYIIQSSNPNCAFDGWLDIYFHSSVARHNPKYLFLPVYPHLLTYGDELLSRRESDQTADFLVSEINENSTDWAVIISTNNFYVHPTVPGREPKIYLDEWHYETGFKENVNLYPDKVLNLKGKPFRIATDKYFPLTSAYPLEGSEVRISLYFCEKYNCTPEAVTDNSLWGTIYDNLSADGVLGNVYNDRADVGVLAVYLWLNEWYYIDYCTGYLAADVTVILPKPTKLSPWILPFLPFKYDVWIAFFISLFLSASSLYFITRVSIRFTRFRDQLIMKVQFTTIDDSLMRAIGLAVLQQPS…
HhalIR41a	MRSYFFMTWFAFFLMQHASASIIYGNETSVNDYLEVLATHVAEKYFSYHKCIVILSDVGLLKNLKVNTTVVYIEINSTKESCVEDVASILAITFRDNCDGYIIQFSNPTCAFLGWLEIYYHASIGRHNPKYFFLPVYPHLLTYADELLSMRETDQTANFLVSEIYENSTDWSVIISTNNFYLHPTIPGREPKLYLDQWHYETGFKENADLYPDKVLDLKGKAFRISAGKYFPLSSPDPLEGSEIRIALYFCEVHNCTPEPVFDNALWGTIYDNLSADGVLGNCYSDRADVGVMAVYLWLKEWYYIDYTNSYLTGDVTLMIPKPTKLSAWILPFLPFKIDMWIAFFVSLVLSACSLYLITRGSIKFTRFREKLIKKVQFTTIEDSSMRAIGLAVLQQPSS…
HhalIR114	MLASLMNITWKVLIIDDKWGLKFPNGTWSAGIFKTLLEGQADIAMGSIWLTIEKYESVPLSTDVGFLSLQNLIRRPVPSNAVWSSFFQHYPLSLWILLLLAAVINFLGVFFISYFTKTIKSDTKYKKWSAISDCSMMTFGAISVDTNHSSDKNPGPVRYLITCWAITTFILMTNFGSSLISYLTTPELRHRPENIQGLVEGGYFWGLTYVPDFERIFDLSNPWHKKWIKKFKLIKNKEEHMRLITNDKFVLWGKALQKKYFVMIEDYWRSDLLSEYEMSSETLATFYTTMALTPGSQLLPAINKYSRRLIETGHLKEYINRALTIEGDPYMSEVVLKTKKGTIGYTTLKISQFQGVFYFLFVGLSIATISFFSEIVYYRNTKK
HhalIR105	MNCSNLLSAFMRLNFMYNLPWVHVPPTLIKTLGHRVITTPTVLAILNRIDIPYILADYGDIVEDEITGAILAGEDGFMQEQVAIMTSQSGWKARAMVVVITINPHQKHFHYLWKEQVMNVVLITRKGSFAYNPFNDTMFSVDGLDVTKVLAERWRDLQGYRVAVAMYRHNLSFRTELGISLGSGIDGSAIYELVKYWNMTVDIVDTGQYNHSVQISDRMLNNGQVDLSMNARFLSREKKFIEKPEYTTSVYTDSVVIVMKIPDKLRGWVLFGKIFKWTVWLGLLGGLILMNRAILWMGKVTNWSNSFWTTLKALCNVPLSRPPRSTPDRLVVATAFLVGMVMLTLFQASLYHFIKEGVTYKRVKIIPQVISKIPLVTDSEIIKDIFRSYDTGTRKVKLD…
HhalIR104	MEWLPLQQRSSVAESENTAKPVSMNITFMVQAYFALNNTQFPEIPPQILRLLGHSVIVSPEALRYLRNVDHPHILAYYGNLVENELTGAVIAGHGRHLFEQMSFLYSQRGWMERAIIILISKYPQQIFFSRNWDRRVMNIIQFTGEELYAYNPFRTSVVKLELEDAWKTMTERWRDLQGYKIPITVFPHMYSYLRQFGPSPGGGIDGTAIFELAKRWNMTVVLKHVIGDEYGPTRANVLLFRGQALICMSTRVAIHMTDDENNLEFTTAAAEDAFVVALKEPTDLSTGQIIIKIFGLKFWMLFFGTMFIINRALFWMTKQKCVFETICNTTSSLCGRPLPKLPRTTRERLILYSGFIIGFIVLTTFQASLFHFVKTTETNKRLKTLHEVFKNHNKLVTT…
HhalIR103	MTLALLCSVCNALTVIHEVPPYVWDLLGSNIVVTPQALSMLPTINKPYYLLDRREVIHKEITGAIVSGDDLFIGIQFAWLTFQRGWYPRAAVVVLAEKVNYHMFCRLWSVRIVNVVVLTTTGLYIYNPFLQSIISVGEHVSQNLTDRWKDLQGIKIPISVYENPVNYIAESGISLGSGLDGSALYELAKYWNMTVELRVNKKMNDSERQVLWGKSDISFTGRSLLQNSYGLQFTSVVYGDRVCVIVRLPPKLRGWDVLLRIYDWKVYVVFFTVLVLTNKAFRLLAKRKNRKNALDKVMRSMTNIAIARPPTAFPERIILSSSMILGLIIVTIYQASMFHFVRQSVRHNKMKTLLEVFKSEIPLRTNEIGLRDFFLPWEPKEIRKLGKKLKEDVNINNAL…
HhalIR106	MGPVESPVAYLFMVISLQELSQLLANASCNHEKWNPSVWTVVMFCGITEPHLETQLAIDVFTRLWQYTVYNSALFIEINNSVYRADPFAESNKCGKEVKQVCISNCSYYHYPGRNKFPDCEFHVSARESFPFSYLKGERYIGSDVNFALLLASTSGLRISWSSRPSPQESTSGKEAHAYYENVSRNEIDLAIGGPVLAFNYFFRVTYGFSHSTQLLQFYVADCQELIGWKLLVGMFSVSLWSVILFTISVSVSALAVFGPKSIITYFFIVFGIILEKPTRLPVGRLRIILMCIVLPFYCISFTYTTYLHSFTMNPPKVCEINSVDDIIKKNVTVMVSGTNDLITRKVRTTLVRKALANTVFSPGLEESAQLLDQRKNFVLLERDLAMEFLINKKGYRIH…
HhalIR75d	MFKLKLIYSYMFFRLSLTDRSQCNTMLGQIHTIIDYFKALKISSLSLLLCLSEEMKILALRQFSQEGFQISFGFSSDSRGTVLDLNCNNQTGGRMDGEWLVLGKAVDTTELRALPDSKVTLLTEEGVLMDIYRPTMSSLLSFANYTGQRDHSDLKGETLKAVTVEDEGTSVRLEEGGDLFGKYGCLCKNARGWSPQMSEVLVDNLKQQLNFKVKRKKVTDCNALYSTLSEGVVDFSSTAIMILPEKMEYSSFTGDLFEYKSMILFKHPRLPVMKNIYVLPFHRYVWFCCVGLFFLCFGLLLAAARSYPGVFEEYTYSSPSDILTLLIGVASQQGIDLGARSPSTRMALLLFSVCSLFLSTSYSANIVALIQSGAETITTIADLVQSPLSFAVQDVSFVK…
HhalIR75f.1	MGQNIICIVIILTNFFEISHSFHISEFLIDYFTQHKIHIVNILVCNKSDAVLIHKNFQERKAPFLSLVHSIEFENNNYVAENFMSTVNLNYLGVFIDFNCENISLLIEEVLSELVNNCCYHVLFWNKLNINKKFIEDSILFGTKLIWARPNENTIALYYISIKTEIVTLGYWENGNLIMENPQINKHDIHNQLLHGILTFTDQNVKNNSIVKFKNEEIFYLGLSSLTNFSLSIYRSLRVMYGLEWELTAVTNPKKLMNYMNIFLNDSADSYDFIITSENNLRAISNEVIRLPSIKIIRQCFVFRHPPVYSYKTFYLKPFSFELWICLGIFLILSAILLYLMCLLKIEDIDHNELSIFGNMLYCLGALINQGLSVPSKRSSKRLIQFNILQLSLFISNFY…
HhalIR75e	MSKFCLLMFIFVRYTFQNMESYKFPISRFFKNKNIGSVTLVGCSEKDLIQESLKLSTVDKGGIMIGLKGNMSSSYPTFDSQHYRTGIYFDFSCDFSKNVFKKMSSDELLNMSFAILISSDDYNETIKFLEYSTISFDSDVTLIVDNNLYDLYRTHVSKPIISNMVGMHYNATISYIKLKKRNDLKGITINSGVVWTGGFPLNITPEGIEKMLNFNYEPEEEFLSRYGFSIHKILEDAYNFRMNISIYDDWGYFNEKLKIWDTGMFHGLSAGDIDLGTSISRVYGQRLDVSLYFPPYLKFRTCFIFKHPSRLGEFTALVKPLTLGSWLCILSGVVLSGLTLWFIKWFETVDIPSNENDLASSLLSSLGTFCQQGLSSDSLRLPVRVLYIFLLVASLVIYM…
HhalIR109	MLVAFRPMTVWVMFLLLAGTIQADQLFSCLQTIAQQYLQSRCLAFLFPLNFSSPSVIDVPPEVRSPLLKSLHEDWAVNLPAVNRYSVDNPFLRPGPTCYLNCAHIIILDGNVPYIRQIFYILYTFYSHFYENGGGNRTRIVITVSDDASEQRAYRALKYMFTLGEIDVIFVAKVDGVINVYTLFPYGKDKNSCLEDNTGIVKLDRWINGSFEKKEDLFPDKIPRRFNNCTIKVGTMHDPPHLMLNEQGEGVGGIEYRIVEMIARHLGLKIHYKFYSRNDTILWTKKERPYGIRTDLRMGRVWMIVSGHSNYIFTFSCITVPHTYLTNRITWFFSNPKKVPNWKLVILAFDRLSWFMVIATTLAFPLILYILAKFSKKKHPFQSLSTTMIIMLGLLFVNP…
HhalIR21a	MGMYSMVDEEHGTENCGIIIPELVMSVINFEIKPKLVKIIFDDLHKADYKFKLNLDKIIKGIHNSAVVFGQKSSAIEAINDNEQPAWIIFSAQPESLPMKGKILLIIHVSVFQLKEWLLSPKVKKHQQQLVVISDPALKKSKGSEKDCDTGLYTQFINPHSFGRGKALILTSWRNHNFTQSVKIFPSEEQTLYNGNHLVVYARDQPPFAFKRILENGEVIWDGVEVRLLLLMKEILNFTMEFQDHIGKQSSDTLQILRQGNTDLVVGGFVMTKEIYGKTSMIYPHFMDCAAFISLTSIALPKYKAVMGPFLWDVWISITLCYILAIIPIAFSAWHTLGPLIQHPSEIENMFWYVFGTFTNCFTFRGQFSWTKSVKNSTKLFIGTYWMFTIIITACYTGS…
HhalIR40a	NLAKRNIIYFFYAGKKRLSNNFFSYLNEAMRICLVLNPRYGIFQVLYSQARVREKGFFLINWWSRQEGIFRSPLLPSAYDMYRNFHRRVFKIPVLHKPPWNFVTYYNDTFEVKGGRDDKVLKLLASKLNFRYEYFDPPDRSQGSAVVNGTMQGVLGLIWQRVADIFIGDLTVTYERSLAVDFSFLTLTDNEAFLTHAPGRLNEALALVRPFNWKVWPAVTATFLLAGGLVYLFFLAANDWKPHKRNLLYQCVWITTSIFLKQNTSANLKFDRVRFLVIILYLISTYVIGDMYSANLTSMLAKPAKEKPISNLEQLDTAMKSRGYQLLVEKHSASHTVLENGTGLYKSIWEKMKNQQTYLLNSTEEGMLMVRDKKNIAVIGGRETFFYNTKRFGIHHFHL…
HhalIR108	MWWALLLPAGIVGFELDMEDPTISEVSDCLLFIAENYLDRRCLAFLFPFNFSDPSLVDVPPLVRSPLLKKMDGRWISYLPAVNPYRMFNPFMKPKPGPSRMLHCAHIVILDETSCLVDQIEEMMYKFYSHYYQHGGGEKTRMVVAVSRPIKEFEIYELLSYMFQRGDLDVILVGIVNNTVTVSTLFPYGKDRDTCQRNNNGSEILDFWVNGAFTRNVDLFPEKLPEKFNNCSLRVGTYHNPPYFIVNQEGKPSGGINHGVLELIAERLGMNIDYRIYNRSDAWLWMEDDGPKGLSTDLRLGLVWITAAGDKNLVFTFPSLIIPHPFMTEHICFFFKNPKEVATWKLIFIGFNDVVWIVLIATAFAFPCCLFLLARFQNYQHPFQKFSISIMSSYALLVS…
HhalIR41c.1	MSIYHFYFYKTLRSEEIYKQMKLVLLLAPLIFHPSGGIELTEDPTSKSLSSLISKIFLDMPKCVVVVLSDFSSLELPNNFVYLRAQSNSSNLFSSLRASYKMKCKGYLIDENSANDFLTTMGKARSAAPERHTPRIVVIPNHKGNYSVDIFMHPESTYIPDMIVIQIIDDDKSEKGVELEVITNSFHNNSIFPEGEVLGIWPIDDMIFFPDKLKNLNGKELITATLHYPPYVLLHPIFDGMETRMVNEFCRLYNCKPIPLTDEYLWGEIFSNGTGIGVSGNVYMDRADIGIGALYLWENEYQYVDFAYPYLNTKITLLVPKPAQKAEWRIPFLPFSLTLWVLQVLSIVLAAAVMFVVNKVSSHIAQGLMLGGEFATGGGIFLRALAMSLLQPPPNRLPS…
HhalIR92a	SSLCLEKCLSSSIIAINRTSVNSYLEVLANEIGEKYFSGHRCVVVMSDAGLLRNFKINTTVVHIEMNPTNESCVQEVADLLRITYRDNCDGYIIQSSNPNCAFDGWLDIYFHSSVARHNPKYLFLPVYPHLLTYGDELLSRRESDQTADFLVSEINENSTDWAVIISTNNFYVHPTVPGREPKIYLDEWHYETGFKENVNLYPDKVLNLKGKPFRIATDKYFPLTSAYPLEGSEVRISLYFCEKYNCTPEAVTDNSLWGTIYDNLSADGVLGNVYNDRADVGVLAVYLWLNEWYYIDYCTGYLAADVTVILPKPTKLSPWILPFLPFKYDVWIAFFISLFLSASSLYFITRVSIRFTRFRDQLIMKVQFTTIDDSLMRAIGLAVLQQPSSRLIGDSPNR…
HhalIR75b.2	PLKVNLYLCIYYIKVFWSSMVNYAFYFDIVNKYFNFLHIQSVVMLICPQEAVKVNVMKEMSDRSFLLSFSVDSIRDNPIIRTGTVLDISCHNTSLILQMMSARKMFNSDMEWLLMEEVNTTESFQQTLENDVLKDTLALPGSCVTLAQFSENERRVKFYEVYRTAIWEPMKFRFLTDYFMNGSKEFSFRRGYRSFEGVVLRTASAVLYPGLFLGWESQELKEVDTISKAGYAFMKDIADHLQYNYTLLFLDFYGYETNGSFNGIMGYMQRGDIDVAANGLMMNQERMPYVDFVGDILVLRSPLIFRQPSLSTVSNLFVLPFHKTVWMLTVVVTLLYSMALFLNLYLKMRLLRLKETDDSSVPEIISVIMAYVCGQGTGLELRPGAGRITLCILSVFCFF…
HhalIR1	MKVLLFYFSLFFVFFCTKGNIELNFNFNNDYLFPIDSTYLIEMMNYTFRDNYCVQLVADESIIANRIREAMFNVNFLRGVSDKRGRFQCINCVFIASTVEIFINILKTRPVDTDKFLSIIININDENVLYELSHKDVTNYLTNWHGVVIDLKAPHFLYRYIPLHKTFKTHNLSDIRNREIGINYGSFGGRKLRVGTFNCSVNSQIGPLDAKGRPSWFGGVEMIFLDAITQKLNFTYEIILPPDGEGVGGRLDKYGNLSKGLVGLVLDQSVDVAFCGIWQTNYINTRSLSISSPIQEVCITYLVPRPLPFNQMGLGLFTSFEGKVWMLIFISIITTAISSQLIAFMAVKHGFSNFQLIKFLKPNNSLLQLWSILCNNAPKSLATFGPLRHVLLWWAVYSL…
HhalIR41c.2	MIRLKNMFHAIMVYLLLHCSYGLIKQEDTRSQKLNKLISQIILEMPDCLVIVMSDSNDLKVPKDIIQMRFSPSSDELPAFLKEAYELKCDGYLVDQESAGYFFISLKIARLHANVRLVPKIAIIPNKIGEYSEALFRDKETAFIPDLTIIQIDNSTTEERFMVVTNDFQGTNRKLKGDFIGIWPDDKIVFFPDKMADLKGKELYSSVVHYPPYVLAQDPVEGVECRPQLEFCRLHNCSLKIRTSEYLWGDIFPNGSGNGIFGEVFLDQSDFGVGGIYTWLEEFQYLDYSTPYGIGRINVLVPKPTKVDEWKTVFMPFSPTLWLLLVFSILVAATLMHCANIAAGKISDELILGGEFTTWVGIFFRAIGMSLLQPPPSILSASPLRRFFTIFEVLFLMFT…
HhalIR84a	MKLLRMIFFIFCYEGTWSSSRCYIPDGIHDVIDFYFRDLFGAHLYFCKLEDAVKAFKRFTSGGPKYNIRHNRDFREPHELLMSYWQPSRLGIFLDTSCDHGIFFFNYTTDLFNASYSWIVWSEEVNFTMFEDTRLSADSEVKVVKPGLEIYDIHRVHISSELKSKLVASWNATDGLVQISPSMDRRDFGGFTFTASIMMIDIKFNESNLLEPLLDKTYEPGKDMVRRYGLAVFLHVAELYNFTYNYILTNAWGDPQPDGTWTGMVGQVARGEAEFGLAPAKYIVQRFEIIDFINSMHIVKCCFTFLQPKLFGSAKALVLPLDEIVWVCLAVLGILSVIVFRILAKYDNTGLSNDSWGGSALLVVGAISQQGIPDNTEKVSTRIVYIFLLIVSFFVAVYY…
HhalIR75h.1	MRLQVLLIFALFSTCTCKNMTDYFEIINIYFSYRNVKSIDIFPCTESEGYWMFKRLLKDGYSTRVNRNLLDKEFQELPYIKGWFVDLTCSKNIIFFSNNVVQITGLDGIWLGYPSVASDLNMTSLRLDSDVMVGSADGRLWDLYGKPLERMILNGAGTWRPANISIPKIKFRYDLGGVVLKGVLVELDLQFFANNITHKIADHDYFPDMEMTQRVSYIFVTYLAKFYNFWFDIVPTDTWGANLKNGSCTGMIGILQRKEADIGISACSFRVERVEVVSFAQRSQELRFICMFMEERIHGTYSSLLIPFSFQAWLCVFVAIVVGATIFSFLQKRDLTEGIIFVTAILSQQGLQKDYRSISARVYSISLLILGLVLYSYYSAAIMNGLLSPAPGSIRNVDD…
HhalIR75h.2	ESMYRLVILLLIGSTHSLRYMNNTLEIITTYFNFRATNVINIYSCNHREGVWLLKHLNALGFMIQIKHHTFDEKEESRPPYVRGWFIDLNCTKNMNFFKTINGLDGIWLGYPVKSLDMNLTKIRLDSDVVLGTEDGLLWDLYNNTKRNLKVSSAGTWRPPKIFMPNSKHRYDLNGTVLKGVLLELELQFFKNNMTEKIGDYSYYPEWETSERLAYVYVQNLAQFYNFEIEIVPSETWGYVLPNGSFGGMVGVIERGYADLGLTACAMREDRMRAVNFVPQLQDLRFICLFMEERIRGTYSALILPFSFNVWLCIFVAIVIGAAIFSLVQNKDVTEGIIFVTAILSQQGLLHDKNRMSARVYSISLLFLGLVLYSYYSAAIMNGLLSPVPPSIHNELELQ…
HhalIR8a	ELLWDLLRQMSMIWRAIFAIGTALFLASDVGSVKLLILKEENGTIWENVKTEEVWEEQHVILNRENEEESFNKVCEELSSGAWMVLDLTWSGWDSVAEIAGIRYLRADLGISPFMRATELTLIKLRNSTDAALIFQHSHHFEQSLWYLVRESSLRVTVHLGLDDESAESLLDMRPSPSSYVIFADHDKANTILKKAVDKKLVYLDDRWAMVFMDIGTAPINKTMLKKRIMQVYMPKSICCTDPGQMLPCHCTEPFNFEIEGAKQLKIALSKAISSSLTEGLSAEPLNYSCSSSALSPKNDSIFYDNLDKALSDSWLLHKTYGEVRLNLRFEIRNIGENRAQQLGNWDPIAGIRTAAMPRVKRFFRIGTGFSTPFAYPTNQISPDGSARWEGYALDLIER…
HhalIR75d.2	SQCNTMLGQIHTIIDYFKALKISSLSLLLCLSEEMKILALRQFSQEGFQISFGFSSDSRGTVLDLNCNNQTGGRMDGEWLLLGKAEDATELRALPDSKVTLLTEEGVLMDIYRPTMSSLLSFANYTGQRDHSDLKGETLKAVTVEDEGTSVRLEEGGDLFGHYGCLCKNAGGWSPQMSEVLVENLKQQLNFKVKRKKVTDCNALYSTLSEGAVDFSSTAIMILPEKMEYSSFTGDLFEYKSMILFKHPRLPVMKNIYVLPFHRYVWFCCVGLFFLCFGLLLAAARSYPGVFEEYTYSSPSDILTLLIGVASQQGIDLGARSPSTRLALLLFSVCSLFLSTSYSANIVALIQSGAETITTIADLVQSPLSFAVQDVSFVKVYLKNGEKEVKDLYETKIMK…
HhalIR75d.1	MGVHTEWLLLDDGSSLDVIKDAYILPGSFVTIAQILGEEVVYLDVYRTSPYRPLKYTVLDNQTLEQFIQLPDRPSRNDFEGISLLGAAVLYYPHMFCGFDCRDHPEVDTIAKTGFPISQHFQEQLNFTLTFQILNDYGWKTNNTFSGLMGLLQREEIDMGVIGIFMRPDRIGTVDFTGDTFEIKSLVIYKQPALSAVSNIFVLPFTRMVWVCCVALSVLTGIFLMADVATSFGNRQTFEESVTTSDVVTLIIGCICQQGTTLVPKTLSARIIIFLFSLCCLFFYTSYSANIVALLQSSSATFRSLSDLTNSPLGIGIQDVIYNKIFFGEATDENVRELYDKKIAPQGPKAYLNPVEGIKKLRSGMFAFDVEIHWGYKIISDTFHENEKCDLDEMRIFLL…
HhalIR2	KNLAIIGRYNDEKVTLSRLHSFSEDKETITLASWSWKEEFRGTLFPKDEIAPAFKSKQLTVLLRHDPPFVIVKSYLNGSKYADGYLIDLWNCITERLDLSFEIKYFPTMEGGDFWNFANNGLRVEMERSEMDVALYASADPVDIYSNYTGVHTGVHLRLCTYEHKKRINFYQFIKTINSSCFAVLTFIGVLSAFLMYIAGNNLADSFLYFLAISFNQGPGEEPPTTSSVRIVIISFSISVLVFFYVSSASMASLSVNNQDLESTTIEEVVDHSYIRRSIIVEYTSAHVMMRYSDLATTFDKLRRVKMAKLPSVRDALTVTSKLKWFSFIERERVWPYWEEFKCCVFESDLRIVRPTHFMVRRNLSYTQVFRQESARLMENGVVSLLIKKWWPIVDASRK…
HhalIR68a	MFILLIFIILTVDCSLVSCTLSSSLIKRLWEYKKDDDFGWLLEDLIQRVLFDAKCLTIISDQFYNDMFTTRMFQKLSVIPIFVIFINENEDLLSPNYKTLSVILQARRKGCNGYIILIANADETMRFLRFGDRHRVIDTRARFFLLHDVRLFHKDYFYLWKKIVNVIFIRKFFEVNRYELMTVPFPSPIVHNWKPIRIDSWKSGKYQKNNELFIDKTSDLRGEIVHVAVFEYMPSVLKKVVEDDQSGNIMPIEYSGLEVLILRSLSDAMNFQILIYEPPNSKTEAWGKQQLNGSYTGLLGEMVSGRADFALGNFLYTPKNIKLFDLSIPYITQCFTFLTPESTTDNTWKTLILPFKKFMWLGVMLTLVVSSLVFYVLANFHKYYENGRISVRPVSIFVK…
HhalIR75b.1	DGVTFTAATSVLYPNIFEGFSEENLNHPEADAYAKVGFAIERNVGQQFNFSFTIKIFFNSYGYLKNGSFTHVMGLMVKEQIDFTTGLMMRDERMDYIDFAGNTFATYSPLIFKQPSLSSVSNIFLLPFEAQVWLATGVLLFVSTIILFVEIIITSRLLFRTRYSFLEVFMGILEDAFLQGSTLQFESAAAKLTSLLFSIVSYFLFIAYSAKIVALLQLSTSSITSLSQLSNSHMAIAIQDVVYNRVYFQETKDPYVKEFYQKKIYPLGEKAYLPPKDGIMKIRSGFYAYKLETDWAYKLISETFNENEKCGLTEMNIFVLPMISPAFPKRSGLREHFSRSIIWQ
HhalIR60f	LSTDLRLGLVWITAAGDKNLVFTFPSLIIPHPFMTEHICFFFKNPKEVATWKLIFVGFNDVVWIVLIATAFAFPCCLFLLARFQNYQHPFQKFSISIMSSYALLVSFPSSVDPRTIVFRLAFATWFFYTIHINLAYSAALKSLLTAGKTEPKMASF
HhalIR25a	MCRLLLLLLLEHALSQTLQTINIMFINEAKNQLAEMSFDVVLNYLKKNPKLGVKVEAAVRVSISGTDAKAILESICEAYNGTVSDGKPPHLVLDSTMNNVPSEAVKTFTDALALPTISSSFGQEGDLRQWKTLDNEKQKYLIQINPPADIIPEIVKSIVQLQNITNAGILYDDSFEMEYKYKSLLINMATRHIIVHVHNADSIENQLMRFRNLDIVNFFILGGLSTIKMALDTASKKQYFGKKFAWHVITQDKGQLSCSCSNATILYVKPEPEPGMKERLDGLRNSFNLVEEPEITSAFYFDFFLHSILAIKNLLDEDDWPKDFNYTLCDDYRADREIVRKEIDLMKNLRLVSEPYSYAPFLLERNGNSFPEFVMKLEKVTIVNSQSESAESMGTWKAG…
AlucIR 25a	MLSPAATTTGIATLTFFILWVCFQTAHSQSATTINVMLIKEERNDIARMAFEVTQDYIKRNSKLGLEMNVYKVTESGSDAKLLLENLCETFNASAQAGKPPHMILDTSVVGVTSEAVKTFSKALGIPTLSASYGQEGDLRQWRALEGEIAKYLLQINPPADIIPEIVRSIVKLQNISSAGIVFDESFVMDHKYKSLLLNVPTRHIMGQVRSIQEIRNQLTRFKELDIVNFFILGSLSTIKNVLTEANGMKFFDRKYAWHAITQDKGPLKCDCSNATILHVKPEPDPGSKERLDNLKTSYNLMEEPEITSVFYFDFFLRGLLAAKSLLEKANWPKDYNKTSCDDYDENHDFVRKDLDLRSSLREVKEPYSYAPFLIESNGKSFMEFNMKIEKVVIVNSIA…
AlucIR41a.2	MKSPRVGLIFLITTSVCNICFGIMRTRSDDEEFNLNMVHLARQVAKDYMSDRRGCIVVISDEGLLDDFTGYIDTTVLRVLFNGSKTECDPTMHKYILNAFYEKCTKYIVQISKPTCFFPAWFLARNGSTYEKHNPRVLFLPVKPHATEYGEEVLAMNQTNISHDVLIAETSPQNLSGPIGMPNELDPNRPITLYTNNFWQYVGEPGRIGRIYIDEWSLELGLRKGVDLYPDKVRDLRGKVLRLSAFPYLPYGNNEPMDGSEARILLEFCVVYNCTVVDVDDGHLWGQIYPENGTGVGEAGTIYMELSDFGVGANYLWLEFWPYLEFSNCYLYGALTVMVPKPELLSGLLTPFLPFPLSLWLVIVLCVFVSAVGLHWVTEATIKFAPHFLEEIYMNHKFI…
AlucIR41a.5	MRNFFLISFLLILTNLMQISCYEDIEHEELTSRLAEEIAEKYFSIDTQNTCITIVADLGVLQKFSAVNFSLVRISSNSPNDSCDTSMAEFIATSLREKCARYIVQIARPECFLPAWFEAIKNTIFERHNPKIIYLPVNDQENSSYGDALLATNETNISPNILVIENSEEEEEWPLKIYTNNFHQLVHEPERSPKIYLDDWHPSVGFRYGVNLFPDKMRNLQQKTLRLFTVPYVPYSNNDPIDGSEVRMVKEFCNVFNCKVEGVYDGMQWGEVYKENRTGIGQVGALYTENADIGVGANTYWLEYWPYIDFSDCYLGGAVVMIAPKPQVLGGWLTPFLPFPMDLWLLVMGVVIASAVGLYLLTNLTMKVSPSLAKKT
AlucIR41a.1	MEGIRIVMILEVALLFSGSTKALNFTQNTESIEDALTTLAEEISTKYYVQISKGCIVLMTRPGFMGTFSVPGAAIIRLVSDNFCNDTDALNAMVTVFDEMCYNFIVQISEVHCFFKVWLDAQWKTIQRWHPEILFLPAYPEQTETADDVFTLKESDYSSSILAINIDETNSDWPFSIYTSNFYERVDKPGRNPKIFLDQWSSYASFRHDANLMIDFIQNLQNKTLKIMTFDYDPYTHFEPLDGTEIKLIQEFCKKHNCSLVAVDDGHYWGDIFENGTSDGLAGMVYDGRADFGAAAVYLWLPYFYFVDYSTSYLYSASTLLVPKPHPVSGWRTPFLPFDMLTWISYGLSVLMAAVFMYVITYLTVKYTRFAEAVQKRRMFLDKLDCIFRALGLAVLQQP…
AlucIR41a.4	MFLQFCFKVALTVTLVANTAGDESHNHLLDDVNSLVREVTDKYMKSFNCIVWVEENDPFLNLSPSFSNSMIFIDGYDSENILLQVFFKKCQGWILQLSDPSKFMKKWEEARLGSLVRFNPRVLFIPWEVSTYATALFQTPEFDYISNAVAVELTRSNGSLQLTVVANNFSANIDEKNETMKVHLGNWPLNSSVEIYPHNLGNLQGKELRVATLQYLPYSQLYPDLDGVEVRILKAFCKHCNCVIKPVIDDFLWGERFDNGTSNGIVGNVLQDKADVGVGAVYLWYYDHLEFSYPYMPSRVTVLLPKPSPMPKWRIPFAPFDLALWIALIASIITVALVLFYMNYYLQRFSTHYVAPNEFQSWSGVVLRAVGMAVGQSPQNAFSTGSTLRIVFTTFELLF…
AlucIR41a.3	MGLQRSSCISAYSFLMGAIVLSTAQADVSKESLTITDVLENIIITKYFDSDKCIVHIVDEPAQQLSTINNLSHPSIIRISSFDVCDDPSLSDKIVFAIDSCCFSFILRVSKPVCVIKAWGKAQLSYEIDTFQRKSPKMFVTVFPVNDSIGDVDEFLSSPETELSSSIVVAVLGGGDPDWPVTLYTNNFYEPVSSAGRQPAIFLDRWNQEKGFQLGTDLYADKILDLQGKEIKVAVVDSLPYSQLRPFIGQEASMMTEFCLSRNCTIKGINDEWFWGEIFENGTGNGLVGMVFDGRADFGIAGVYLWASVFKHVGFSETYLQSGVTLLVPKPEKVGGWLIPFLPFSPQMWISYLLSVIATGISMHLITKATIKYTRFAEAVEKRGMFLTEVDTTFRALGL…
AlucIR21a	MRIEFFLLVVIANLAVPTKISKLLESLAVVQHESIACMPPDGVPYMVPLLNAIARRYLKDHVTVVLYDDYFYFHPRLKSMLDHILLNYAYPLRHGRINTTMAKPKVPPGILEARENEQMAFIVFTKETEIGAESIREYTSRNTMTLLIAPTSVYMVRQFLGTKLAGDITNLLVIVDPMIRVKLLSQKVGQVFKECDILIYSHEFASDSLGSTTPVIVTAWRRTQFTRQVQLFPSKFKQGLGGIHLTVAASEIAPFVFRKRGQESGAGYTITKWDGIEIRLLNIVSQMLNFTVEYKEPELIEEEDVAQAVIKEVLAKKANLAVGGVYLTPERINGLLFSIPHTRDCASYISLSSTALPKYRAIMGPFLWDVWLALIAVYLFAMFPIAFSVWHSLKPLLDD…
TeleIR21a	MAFYLSLGNPVLQKYIREEVKDYDCHQVIPGLVTTIVNDYFTTNLTVLIIDGNYFLDISFKRTLSKILEGLKYSSVMFGRKNNEFLQPRGNERPSYVVFSSQLEAFPGKTLLISHNSPFQVKKWLTSTLARKYMDIVAISDPAILKSNGEKNDCEVGLYTHSLNDESFGGAKAIIVSAWRKNNFTRKPILFPNKYISGYKGVHLKVAIEEQPPYTFKRLNNQNELVWDGVEVKIINHLAMMLNFTYEFMEAKTHLNPRSVLELVKKKDADIGIGRQVATSPLLKLVTLSYPHSQDCAAFISLASTALPKYRAIMGPFLWDVWVALTATYIFAVVPIAFSAWHTLRPLVDNPAVIEDMFWYVFGTFTNLFTFVGEKSWTKGAKCSTKLFIGTYWVFSIIV…
TeleIR75d.1	SEALWLGSGGALPLRLIKAYFTQLHVRSLLLVVCSPRGSFYRIIRKKCDETQLISGLSASGFSISFYPESIPSLPTYRSGALMDLSCKTAKPIIDKFTKARLFGVHTEWLFIDQVNSTEELRLTEGVEKLANAYILPSSRATLVQTDSDRLAFYEMFRPSKYRPMEMHFRSSQLLDEPFQPLGPLSKARLNFKGISLTAAAVLYHMEKFTGFDSYENPEVDTIPKVNYPIVLTLSEQLNFSLTLLLIDDYGWQTNMTFSGLMGMLQREEIDMGATGIFMRPDRIVTVDFTGDTFQIKSKLIFKQPSLSSVSNIFVQPFTVMVWICCLALAVLTSGLLIFDSLVTIGRRKAFSGPVSSSDIITTIIGCICQQGATLVPKSGSAKITLFLFSLCTLFFYTS…
TeleIR76b	MSFTTVTHYLLLSLCSNYPSPNNGTEGFECKLKSINSKETAKEEFKGKILKIVSYEDYPLSTITEDPGGKLKGGGVVFEIINTLQEKFEFKYELVKGPRNLGDNGTGLLGLLTRGEADMAAAFLPVLPGTHTYITWGTDLWQMTYYVLMKRPEDSASGSGLLAPFNKEVWFLILASLIIVGPTIYFLMWLRLRLCATEDQQLFPMGSCVWFVYGALMKQGSTLTPVSDSARLLFATWWIFILILTAFYTANLTAFLTLSLFTLPIKDISDVANPAHKWFSTTGGSVEYSIKNKDDGDLYLLRESERRGRGEFKDIISDSQILKLISEDWLYLNDQYSLTRLMFEDYKRKTEKGIEESKRCTYVLTENYFLIRSIAFAYPKGSALPAKFNRIIQIFVESG…
TeleIR75q	MKYIPANHEPTELLVHYWQPHKVGVFLDLSCDRGLHILDWVCLQGRKLFNSSYIWLLWSPEASTLPQLEDSGLAADSNLKLVRPGLLIYEVYKMHVTTETIYSPLSIWNSTYGHQSIQQPSKRDDFKGFVFNATLMMVDIKFNESNLIPPLLDKTYESGKDMVRRYGLAVFLHLAEMYNFRYNYFLTDSWGDFLPNGTVPGMVGQVMRGEVEFGLAPAKFYISRYNTIDYISSLHIVRVTFTFLQPKLFGSSKALILPLDSVVWYCLAGIGVLSIISFRILGKYDKTGLSNDNWGGSFLLVIGAITQQGIPDNTEKVSTRIVYVFLLFLCFFTAAYYNTAILNGLLLQAPNAIQNIEQLLKSDIKLGMVDIPYFYNEMRQNDTLSVRVREKILKSKQKK…
TeleIR8a	MGSMLFIIVILGSAFTIEKSNCLKLLVLKEENSTIWEDSGGKGDWDAEVISLDRENPGESLQKVCTALGSSGAWLTLDLTWSGWEDVATLEGLRYLRADLSIAPLLRAAEAASLKMRNSTDAVLIFQHNRHLEQSLWYLVRESNLRVAVLEGLDEESSARLLDMRPSPSSYIIFADTSTANRILQTAVESKLVTVDDRWTVVFLDLDFERLNSKLLLKKTMTMAFSTRQCCRQDEPLPCSCPQPFDLERAGLDQLKALLDDVRADSVKRGLPDSDVVYSCGNSDVGNSTDLTTLSESFIKEAGKSWALVMENSTSQYPRLSLKAELEISVKVGPSTVELGRWDTGSGLRPVSVLPRVKRFFRIATGYYMPFAFNSTTKTQEDGSPVVEGYAVDLIDKLA…
TeleIR75d.2	MASFSIESINQDAEARSGAILDVSCTPSEYILENISKRRLFSIDKEWVLLQTTNEIGIFNGTYTSPRNKELYILPGSSVTLIQYSSEVGKLAFYDMYRIITWSPMKYELMAILDSNAYEEIPTRKERTDFEGVTLRTGTAILVRDKFKGFGSFENLEADFYAKSSIFVARDVAFQFNFSTTILVEDTYGYKGPDGNFGGLMGKIQRNEIDFVAAGVIMWEDRYPMSDFTGSVYKIRCPIVFRQPSLSTVSNIFLLPFSRIVWSTAAVTSFVFVLGLAVSYRTGVRFKNLKEKFDLSLEEILTTILSCICQQGPNAINEAPRARIALFLFELFVFFLFVAYSAKIVALLQSSVQTIKTISDLTSSPLEVGLQDISYNHMYFEATNDSDLKSFYLKKIKPH…
TeleIR25a	MTWLYFFFIGQLIPVVFADGGVQTINILFVTEEANEIANKSLDVTLTYLRRNPQLGVRVDQVTRVTISGNDAKSILEKLCMEYNDSVSSGKAPHLVLDTTMSGVPSEAVKALSAALALPTISASFGQEGDLRQWRVLDMEKLKYLIQINPPADIIPEIIRSIIQHQNITNAGILFDNSFVMEYKYKALLLNVPTRHIIVHIDDSKDFEQQLARFKDLDIVNFFILGRLSTIKMALDTAVSKLYFGRKFAWHVITQDKGQLACSCPNATVLHVKPEPDSGTKERLDTLRTSYNLIEEPEITSAFYFDLFLHSILAMKSLMSADEWPKDFNYTLCDDYREDKEISRKDLDLMKHLKEVTEPYSYAPFLLEKNGKSYQEFTMKLEKVSILNSQSESAEILGT…
DmelIR8a	MELPLLVLLLALRFAGSEVLKITFWIEPVQRAEFDTDIAMVLKELDALRLDVKVDDTTLTLTRSEDGLDMQRFCEILSTVGASAVIDLTYSHWEEGYNLVRSLGIGYVRLERIMRPFLDMFGDFMRQKRANNVAMVFMNARDAVEAMQQMLVGYPFRTLIMDASQTDPGQHFLERIRSLRPAPTYIALFARAAAMNGIFEKVQKADLFQRPLEWHFVFLDTRDRVFKYRRQAELCTRFTLNPRAICRSMPMPDLYCGSGFTMQRAMLLNVLRSLINAAQVSPGYPLAIYQDCNATASSSEVSDPLEKDDYNWLDMVHWSNFLAYAPPLPHIQDQFQSPVPGLTFAVNISAGYYSSEHEAKTDLAAWSSVGEMRLLNETISPARRFFRIGTAESIPWSYL…
DmelIR25a	MILMNPKTSKILWLLGFLSLLSSFSLEIAAQTTQNINVLFINEVDNEPAAKAVEVVLTYLKKNIRYGLSVQLDSIEANKSDAKVLLEAICNKYATSIEKKQTPHLILDTTKSGIASETVKSFTQALGLPTISASYGQQGDLRQWRDLDEAKQKYLLQVMPPADIIPEAIRSIVIHMNITNAAILYDDSFVMDHKYKSLLQNIQTRHVITAIAKDGKREREEQIEKLRNLDINNFFILGTLQSIRMVLESVKPAYFERNFAWHAITQNEGEISSQRDNATIMFMKPMAYTQYRDRLGLLRTTYNLNEEPQLSSAFYFDLALRSFLTIKEMLQSGAWPKDMEYLNCDDFQGGNTPQRNLDLRDYFTKITEPTSYGTFDLVTQSTQPFNGHSFMKFEMDINV…
DmelIR21a	MSYYWVALVLFTAQAFSIEGDRSASYQEKCISRRLINHYQLNKEIFGVGMCDGNNENEFRQKRRIVPTFQGNPRPRGELLASKFHVNSYNFEQTNSLVGLVNKIAQEYLNKCPPVIYYDSFVEKSDGLILENLFKTIPITFYHGEINADYEAKNKRFTSHIDCNCKSYILFLSDPLMTRKILGPQTESRVVLVSRSTQWRLRDFLSSELSSNIVNLLVIGESLMADPMRERPYVLYTHKLYADGLGSNTPVVLTSWIKGALSRPHINLFPSKFQFGFAGHRFQISAANQPPFIFRIRTLDSSGMGQLRWDGVEFRLLTMISKRLNFSIDITETPTRSNTRGVVDTIQEQIIERTVDIGMSGIYITQERLMDSAMSVGHSPDCAAFITLASKALPKYRAI…
DmelIR31a	MNLLISMFILILAAGEGEIIPSMEESVVTNFVKSLVKTKQAIVFSCLFKDFKEISLALMRINQFVSVVNLNQSYSLTSILTRENYARTSVMVNARCSGSSELLFEASENRYFNKTYQWFLWGVDLEVQSLFPLNLNYVGPNAQITYVNETADGYAYWDIHSKGRHLKSNLEINLIATLINDTLNIARDIFHLQSIDFRGQFNGLTLRGASVIDKEDIISNEQIESILSRPTKDAGVAAFIKYHYELLGLLRERFNFTVNFRNSRGWAGRLGNTTFRLGLLGIVMRNEADIAASGAFNRINRFAEFDTIHQSWKFETAFLYRYTSDLDTHGKSGNFLSPFSDRVWLFCLLTLGAFSIIWVLFEIIDYKILRIRVNSQKLEHLNQKSSVICIKTTCIERIL…
DmelIR40a	MHKFLALGLLPYLLGLLNSTRLTFIGNDESDTAIALTQIVRGLQQSSLAILALPSLALSDGVCQKERNVYLDDFLQRLHRSNYKSVVFSQTELFFQHIEENLQGANECISLILDEPNQLLNSLHDRHLGHRLSLFIFYWGARWPPSSRVIRFREPLRVVVVTRPRKKAFRIYYNQARPCSDSQLQLVNWYDGDNLGLQRIPLLPTALSVYANFKGRTFRVPVFHSPPWFWVTYCNNSFEEDEEFNSLDSIEKRKVRVTGGRDHRLLMLLSKHMNFRFKYIEAPGRTQGSMRSEDGKDSNDSFTGGIGLLQSGQQADFFLGDVGLSWERRKAIEFSFFTLADSGAFATHAPRRLNEALAIMRPFKQDIWPHLILTIIFSGPIFYGIIALPYIWRRRWANS…
DmelIR64a	MHWWLLVFLPLSCQGLPEHELLELELDYGLAEPQRTSLLQSSLILQFSQDYKHIPRITYFTCQKPHLQTPNQIPNAAEHRDAFAAKNFQLIKSLYESELFVRIVLLDVLAQSPTSGRPNRPGNGPTGGFSQTPSQAQSNSEWLEGVLRMEALRQIAVVDLACGAVSRRFLELASAKMLYSEKFHWLLIEDFAWHGRTQTAEGSGKRDDGEMEEEEPPGQQIQATDDEDLPSIESFLGGMNLYMNTELTLAKRMSEAAHYTLFDVWNPGLNYGGHVNLTEIGSFTPTEGIQLHTWFRTTSTVRRRMDMQHARVRCMVVVTNKNMTGTLMYYLTHTMSGHIDTMNRFNFNLLMAVRDMFNWTFVLSRTTSWGYVKNGRFDGMIGALIRNETDIGGAPIFYW…
DmelIR75a	MQLVQLANFVLDNLVQSRIGFIVLFHCWQSDESLKFAQQFMKPIHPILVYHQFVQMRGVLNWSHLELSYMGHTQPTLAIYVDIKCDQTQDLLEEASREQIYNQHYHWLLVGNQSKLEFYDLFGLFNISIDADVSYVKEQIQDNNDSVAYAVHDVYNNGKIIGGQLNVTGSHEMSCDPFVCRRTRHLSSLQKRSKYGNREQLTDVVLRVATVVTQRPLTLSDDELIRFLSQENDTHIDSLARFGFHLTLILRDLLHCKMKFIFSDSWSKSDVVGGSVGAVVDQTADLTATPSLATEGRLKYLSAIIETGFFRSVCIFRTPHNAGLRGDVFLQPFSPLVWYLFGGVLSLIGVLLWITFYMECKRMQKRWRLDYLPSLLSTFLISFGAACIQSSSLIPRSAG…
DmelIR75b	MNFSVLESHFKEAQIFVDADVTYVTHDPFSKNFLLYDVYNKGRQLGGELNITADREIFCNKTNCRVERYLSELYTRSALQHRKSFTGLTMRATAVVTALPLNVSIKEIFDFMNSKYRIQLDTYARLGYQARQPLRDMLDCKFKYIFRDRWSDGNATGGMIGDLILDKADLAIAPFIYSFDRALFLQPITKFSVFREICMFRNPRSVSAGLSATEFLQPFSGGVWLTFALLLLLAGCLLWVTFILERRKQWKPSLLTSCLLSFGAGCIQGAWLTPRSMGGRMAFFALMVTSYLMYNYYTSIVVSKLLGQPIKSNIRTLQQLADSNLDVGIEPTVYTRIYVETSEEPDVRDLYRKKVLGSKRSPDKIWIPTEAGVLSVRDQEGFVYITGVATGYEFVRKHF…
DmelIR75c	MTSWPLYRLIVFNLLEINLSNLMVFHCWSIKEAFPLVEMLNQNGIFSQYIDVQNPDNLANVHKEYLDSDLVSLNADVTYVSREDEERFILHDVYNKGSHLGGKLNITVDQTLQCNRSHCQVKEYLSELHLRPRLQHRMDLSSVTFRLAALVSVLPINSSEEELLEFLNSDRDSHMDSISRIGNRLIMHTQEILGFNVQDAFGGAIGMLTNESAELCTTPFVPSWNRLHYLHPMTEQAQFRAVCMFRTPHNAGIKAAVFLEPFMPSVWFAFAGLLIFAGVLLWMIFHLERHWMQRCLDFIPSLLSSCLISFGAACIQGSYLMPKSAGGRLAFIAVMLTSFLMYNYYTSIVVSTLLGSPVRSNIRTIQQLADSSLDVGFDTVPFTKTYLVSSPRPDIRSLY…
DmelIR75d	MKVQVAHWLPLIFFLLVSGTPRVAGSWRSEYSRQDPDPKTRWGNQLPDMLVAYYRHHGVHSLMLVVCHTDIADFRLWKLWQHFNLNNFYVQVSTESSLRDLQHVDALDEHKDAPPPKSFHANNSTHWETSFLLPALPYKMGILLLEFSSECALNLLRWSAASEHNYFTTNRFWLLLTEDPGDIDLLEDPEIFIPPDSELRVLHYENVGNFSCSLIDLYKVAAWKPLKRTLVGHNIRNSRHVIHALQHFGSAITYRQDLEGIVFNSAIVIAFPDLFTNIEDLSLRHIDTISKVNHRLMLELANRLNMSYNTYQTVNYGWRQPNGSFDGLMGRFQRYELDLAQLAIFMRLDRIALVDFVAETYRVRAGIMFRQPPLSAVANIFAMPFENDVWVSILMLLII…
DmelIR76a	MENLLVESYYFSTVLSFFAQQFFADSHATCIFWHPAFDFRLETVHPMPLIIMDWHRWANRSDQDVYDYKIKEDEFEGKGIPYNDWTLRLTVAIERSHCETFIAFQEQIPEFARYFYHASIYSIWRSLRNRFMFVYTKEFEDKKDSYLSGYIFQDQPNILVITSQYLNSSTFEIKTNRFVGPRNFNKNPEPVEFYILQRFDAKGTKATWETQSAMSSKMRNLKGREVVIGIFDYKPFMLLDYEKPPLYYDRFMNTTDVTIDGTDIQLMLIFCELYNCTIQVDTSEPYDWGDIYLNASGYGLVGMILDRRNDYGVGGMYLWYEAYEYMDMTHFLGRSGVTCLVPAPNRLISWTLLLRPFQFVLWMCVMLCLLLESLALGITRRWEHSSVAAGNSWISSLRF…
DmelIR76b	MATGIELLVAAALCVACPPLNDSPPTNLIQMGENGTLSPVTELPMDVDASEAGFDADAPVETLETINRKKPKLREMLDWIGGKHLRIATLEDFPLSYTEVLENGTRVGHGVSFQIIDFLKKKFNFTYEVVVPQDNIIGSPSDFDRSLIEMVNSSTVDLAAAFIPSLSDQRSFVYYSTTTLDEGEWIMVMQRPRESASGSGLLAPFEFWVWILILVSLLAVGPIIYALIILRNRLTGDGQQTPYSLGHCAWFVYGALMKQGSTLSPIADSTRLLFATWWIFITILTSFYTANLTAFLTLSKFTLPYNTVNDILTKNKHFVSMRGGGVEYAIRTTNESLSMLNRMIQNNYAVFSDETNDTYNLQNYVEKNGYVFVRDRPAINIMLYRDYLYRKTVSFSDEK…
DmelIR84a	MIKLQVKVISWPLIILTAFLRVLQIESINTNFLELAAFEDFLRSEHLSHVLVVRGDDADGDWKIECHQKLLANYRVQFYRPEMSANFEDLMFYGSPRTAVLVLNSEHVLVRRQVFGVASEAGYFNNSLAWFILGSGRESLPVEQLIDQLLSGYRMGIDADITVALRGPDNASMLFYDVYRISRQANTPLIIEKKGLWTHSGGYQKFGNFKNTWVIRRRNFLNVTLIGSTVLTEKPPGFGDMEYLADDKQLQQLDPMQRKTYQLFQLVERMFNLSLAISLTDKWGELLDNGSWSGVMGQVTSREADFAVCPIRFVLDRQPYVQYSAVLHTQNIHFLFRHPRRSHIKNIFFEPLSNQVWWCVLALVTGSTILLLFHVRLERMLSNMENRFSFVWFTMLETY…
DmelIR92a	MLLQPLVMHLSQLLRIIVGQYFAEFPSILIVYNNSASTTPLQLEYLSALELVLRELSKPIRLQWINVAFLKDLNDLEDQVMGALNSSVTEGFITILSQTHHFIHARYYATRNANVRLKDKRYLFLCEDESPAELLCMDILQFYPHHLMVRPGTETAPTGPTGPHPDPRRGGGASVSTKNKDDGEGGAGNKTTSPYRDINFELWTQKFVGAVGNLDALLLDAFLPNETFANRVELYPNKLLNLQRRSLLVGSITYVPYTITNYVPAGQGDVDPIHPQWPNRSLTFDGAEANVMKTFCQVHNCHLRVEAYGADNWGGIYDNESSDGMLGDIYEQRVEMAIGCIYNWYDGITETSHTIARSSVTILGPAPAPLPSWRTNIMPFNNRAWLVLISTLVICGTFL…
DmelIR93a	MNPGEMRPSACLLLLAGLQLSILVPTEANDFSSFLSANASLAVVVDHEYMTVHGENILAHFEKILSDVIRENLRNGGINVKYFSWNAVRLKKDFLAAITVTDCENTWNFYKNTQETSILLIAITDSDCPRLPLNRALMTVECRINAVVFVDQTILEENALLVKSIVHESITNHITPISLILYEINDSLRGQQKRVALRQALSQFAPKKHEEMRQQFLVISAFHEDIIEIAETLNMFHVGNQWMIFVLDMVARDFDAGTVTINLDEGANIAFALNETDPNCQDSLNCTISEISLALVNAISKITVEEESIYGEISDEEWEAIRFTKQEKQAEILEYMKEFLKTNAKCSSCARWRVETAITWGKSQENRKFRSTPQRDAKNRNFEFINIGYWTPVLGFVCQ…
DmelIR7a	MFHHLWLLMGLRSLAMGALHPPQPEAMTPLVAAALEILAEQVSPSQSTLAVMDLTQDAEHRDERQEQLMTIILRSVGSEMALRTFQKPPAEVPASFVVFLVNSAQAFNTLGFHFTDIHSTREFNFLILLTHRMSSRAERLQVLRDISRTCVRFHTSNVILLTEKRDGVVLVYAYRLLNMDCDLSVNLELIDIYKNGLFRHGHEARSFNRVLSLSGCPLQVSWYPLPPFVSFIGNSSDPEERAQIWRLTGIDGELIKLLASIFDFRILLEEPCNKCLSPDIKDDCSGCFDQVIISNSSILIGAMSGSHQHRSHFSFTSSYHQSSLVFIMHMSSQFGAVAQLAVPFTVIVWLALVVSSLLLVLVLWMRNRLVCGRSDLASHALQVLTTLMGNPLEARSLPR…
DmelIR7b	MKYWLYILSCCSLVASTMESSSDWDLAEALAQVVANSEMGRFKTLYIYTHTNSQSTGGHLEELLDQVLMIVPNNLQARRLLLQQSMEYKPYVHAVLALVDGLPSLSAIYARIRATQDLSHTLIYMSMPTDAYGEEMQATLRFLWRLSVLNVGVVLRPPGDHILMVSYFPFSALHGCQVISANVVNRYQVGTKRWASQDYFPSKLGNFYGCLLTCATWEDMPYLVWRPDGSGSFVGIEGALLQFMAENLNFTVGLYWMNKEEVLATFDESGRIFDEIFGHHADFSLGGFHFKPSAGSEIPYSQSTYYFMSHIMLVTNLQSAYSAYEKLSFPFTPLLWRAIGLVLILACLLLMLLVRWRHHHELPRNPYYELLVLTMGGNLEDRWVPQRFPSRLVLLTWLF…
DmelIR7c	MLHSAVHNVSLVYALVWAIDNYYGMATSTPLAVVQFPTSRESRRLHNDLIDAALGRSSGTGRIQFLLEDDRVEMTETDTDPPPPSGLTGRPIAIWFLDSLRSYFRLEMYLNQLGSPYKRNGFFLVIYTGLEDQPMESLKIMFRRLLNMYVLNVNVFLQRDGTVHLYTYYPYGPHHCQSSLPVYYTAFQDLAAPANGFGLTKPLFPRKLTNMHGCEMVVATFEHRPYVIIEDDPKTPGGRSIHGIEGLIFRSLAERMNFTIKLVEQKDKNRGEILPDGNFTGILKMMVDGEVNLTFVCFMYSKARSDLMLPSTSYTSFPIVLVVPSGGSISPMGRLTRPFRYIIWSCILVSLIFGFVLICLLKITALPGLRNLVLGRRNRLPFMGMWASLLGGLALYNPQ…
DmelIR7d	MDIRCVVALLLGLCKVQAVVWPHQHLLEEQLASQISATLQKIFINGLAVYNFGVFISTSYEEMDRDRVILVHQVLNRNLYPPNFPVAVVLASKMNRKITAQVFTQLLFVQNAEQAIAIAEGVNRNGLCVIVLLTSQPERPIMTKIFTYFMQERYNINVVILVPRLHGVQAFNVRPYTPTSCSSLEPVEIDIKDGDLWDVFPRRLKNLHGCPLSVIVWDIPPYMRINWKSSDPMDGLDGLDGLLLRIVARKMNFTLKLIPNEPNGLIGGSSFMNGTFTGAYKMLRERRANITIGCAACTPERSTFLEATSPYSQMSYIIVLQARGGYSIYEVMLFPFEKYTWLLLSTILGLHWIVGSRWRMPSPILAGWMLWIFVIRASYEASVFNFIQNSPVKPSPRTL…
DmelIR7e	MNHINEFVARAVLHVVHHYILSVTPSLVLTLCCRSNHTCNFYNKMMSTLFREWGLAPLQIVNVLRGVPWHPVPGRRHFNVIFTDSFAAFEEIRMEYYSREYNYNEHYFIFLQARDRLLQGEMRLIFDYCWRYRLIHCSIQVQKSNGDILFYSYYPFGEHGCSDMEPQLINRYNGSMLVEPDLFPRKLRNFFGCPLRCALWDVPPFLTLDEDQEEVLRVNGGYEGRLLLALAEKMNFTIAVRKVHVNMRDEALEMLRRDEVDLTLGGIRQTVARGMVATSSHNYHQTREVFGVLASSYELSSFDILFYPYRLQIWMGILGVVALSALIQLIVGRMLRERMGSRFWLNLELVFVGMPLLECPRSHTARLYCVMLMMYTLIIRTIYQGLLYHLIRTHQLNRW…
DmelIR7f	MQGEDANLYVARALRLVIENVLAQLSTTLVVTISTRHLGTAHWFEYMMNILMDSWRMVAVQLLRIRPDLVVNPVPGRKRVSLLMVDSYQGLLDTNITASNANFDDPDYYFIFLQARDHLIPKELQLILDHCLAHFWLHCNVMIQTAQVEVLVYTYYPYTADACQKAYPIPVNTFDGRKWKASQMFPDKLSQMHGCPLTVLTWHQPPFVELVWDPKHNRSRGSGFEIQLVEHLARRMNFSLELVNIALLRPNAYRLAEGSSEGPIEKLLQRNVNISMGYFRKTARRNQLLTTPMSYYSANLVAVLQLERYRIGSLALLVFPFELSVWMLLLLALLIHLGIHLPSARRGNEEDGGGGLQVVALLLGAALARLPRSWRHRFIAAHWLWASIPLRISYQSLLF…
DmelIR7g	MNVTSLLNFESMKYIGAQTQAASINHHVAQALRVFIEDFYQRIAPAFIVVLSCRRPSPMNFYRNIMQLLYESVDTMIVQLVLVELGRPRRIAGPRTHNLLLVDSLDALLDIEIHTYTAQSDTSEYYFIFLQQRDALIPHDMQGVFAYCWRHQLINCNVMTQSSGGQVLLHTYFPYAPGQCNDSQPTRINMFLGESWKHRDYFPSKLHNLNGCPLIVLARKVSPFLDLDEGQRELRGLEGRLLQELSRRMNFSIQFSGLQDQLKNRTTWTEKQLLQKLVQERIAHLAIGYVRKRIQYATNLTPVFPHYSNRVVGCLLLNAHNLTSLEIWSFPFQALTWICLVAGDRLALVLAVYAASLGLPIDPPERPSLQLLFASWLIFGLIVRSMYSALLFFILRYHL…
DmelIR10a	MAVLGTVFLLFMLDLKTLNLTRLNGLLVEPTRDLPQLELWLRAGSDHQDAENPYVQWFLLRTEIPLSIVTYQENRYWMDDPFGRRNLVLVMSLDQLLTNRGAAAPIQKASTFFYILADQDKDLSADEQLRLEGSCRQLWTQHKVYNRFFLTRDGVWIYDPFKRRDSAFGRLVRYYGSETLDKLLFRDMAGYPLRIQMFRSVYTRPEFDKETGLLTRVTGVDFLVAQMLRERLNFTMLLQQPEKKYFGERSANGSYNGAIGSIIKDGLDICLTGFFVKDYLVQQYMDFTVAVYDDELCIYVPKASRIPQSILPIFAVGYDIWLGFVLTAFACALIWLTLRVINLKLRIVSLGNQHIVGQALGIMVDTWVVWVRLNLSHLPASYAERMFIGTLCLVSVIFG…
DmelIR11a	MRFAILWLFSGCLLPGIQVGIWVVVRAQPTGRDVLLSRLGNQQNELNTRRLANASSYLTRNYIANRINTLVVREICVECPYELSERQRQLVDQILASLAPELSVLLHKGTAEETTWEYTLFVVNDHTAFTGQVFIFPDELLEREFFCIVVVSEIQSRQFVRQTVGSIVKSNLQMHFVNVVVVAQLEDGTVGTYSYKLFKANCTPGITVRQINHFDRITGKPQQSMPDLYPVRNGHLGDCPFNVGAAHMPPHLIYKRHKDPPPASNVSIPAEDLAGIDWDLLQLLAKALKFRIQLYMPQEPSQIFGEGNVSGCFRQLADGTVSIAIGGLSGSDKRRSLFSKSTVYHQSNFVMVVRRDRYLGRLGPLILPFRGKLWGVIIVILLLAVLSTCWLRSRLGLSH…
DmelIR20a	MLASLNRSTGLSAELLDLYGLVVHFLLSGEHTTLVYFNPAGLDCSWGVLWQRNLTAHPQIVWQRNYSYPDLYYQFNAKLLVLACLPMDSRAAIQLEILANSLSHLRTVVRLLIEVAGPDQVTLARQYLSFCLRRSMLHVELYFRDYHHSLILYSFRAFPSFELVMRWISVGQGVKLFLHKLDDLRGHRLRVIPDLSPPNTFFYRDARGDNQVTGYLWDFLATFAGRLNAGLEVVRPSWRAGSASDSSYMLEYSAKGLIDVGLTTTLITKWNLWAIHQYTYPLLVSSWCTMLPVEKPLATPDLFGRIVCPTLAMTLLLIILVTWLVFRQLRCLTRLKNSRPARIVPHLLTLLLLTTCSAQLLSLLIFPPYHVRIASFEDLLRGDQKILGMRNEFYNFDGA…
DmelIR41a	MFIDLSWSLVLSAIVGKYLNESTICIFWNDKFEFQLLHKSDYISFVGINIKSFDDNGGHYIIDTGLKKKELQNKHLFLDELVIKIIISIEVTHCETFVVFDKDIDRFVNAFNKASVYSIWRSLHNKFVFAHIANESPESRNHFFEDQPNILFVVRDHSSASSFDIKTNKFVGRKAENPSQMILVDRYLASEQRFQFGKSLFADKLNNLQGREVIIAGFDYPPYTVIKHNMSTNAQDMGVSGESDFKNVYIDGTETRIVLNFCEQFNCTIQIDSSAANDWGKVYPNMSGDGALGMLINRKADICIGAMYSWYEDYTYLDLSMYLVRSGITCLVPAPLRLTSWYLPLEPFKETLWAAILLCLCAEATGLVLAYKSEQALYVLPGYREGWWTCTSFGVCTTF…
DmelIR47a	MRQIKLLVWLLVVGVVSSTEQLQFLKNFLEAVHKERSISTILLIQRKVHKNDFLHGLYPIFWPIICLDETKRVELVNNFNKDFLALVYMESEADTLLLSALAADLNHIRDARIMIWLQMSPSENFLDRIVFQASKQKFLNLVVIENTLKTRRFYPFPQPKVQVIDKPFEEKEIYPALWRNFMGKNAIAVPDLVPPRSFNSFDPKTGHRRESGSIYNVFKAFTQRYNITMLLKWPLIRNTTQEEIIGKSVRGEIDLPITGQLISFRHPNGSRSQPLLGMTALSIAVPCGPELPMFDRFFLFYGLATPITITGYYVLLNTIEIILGTLSDRIKRHPRRKKILNLVLNLRVFSCILSLPTPQGNRLRSVKGQLTMVMSITGLILSCIVAAQTSTILTMKPQY…
DmelIR47b	MREAQIIIFLLTSAAAVTLKQYEFLXSFLKAGEQEQTITTLLMMQKHVHTKNLLQGLYPXPWPIIHFVETQRIKFIALLYMSSEKDIFLSSLAANLKFERLDKPFGKSNIFPVLWRNYMGXIALTLDHLVEPRSFYWTDPRTNIKRRTGYIYMLITNFAEQHNITLQLXSPPNEDMSQMVIIERTHKGPRSTHNWADDQLETFERXQDSLLPWHGSMAIVVPCGQEMSAYERFHAAHAFRAPIIFFGFHIFLSLIDFLLRTISDRIRCNPRRIQLLQTVLSLCVLRCILSTSLPNSNXLRSRLRDNSPXXXVLQAXSYSALWXLTGTAXQXHNRDFQSHKLHDYXTTDGSXHSIEVPGLLKARNXXIXLFHIFSSLGTKFDLRIGSAGSHTSGVEFRYY…
DmelIR48a	MHLLITETYMIIGKTLHDILNELNERLIISTNIIFCKQFDNLIHFEAQTSRFVYSSLEAFNITSLWNHVGNDNKLFVIVGNVPPYELFAKLELSSPENCTQFILNNTVDMCADALVKNSKAFSVSRELRIAPANVIVPHGKPLLSYRYLAAPFNTKVWIALGTYVFLISGFLCLIHWLRSGKWDFSQNLLEVYSSLLFTVFHLKATNGIERYILFGVLFISGFVYSTSYLRLLKSMLIAETFEKQIQTFEELAESNIPLLINPYDRMIFQHHHIPKSLWTAVRTVSSETLLNHRSHGYVRLCPAILTASKIPSHTHRHLFSVCRFSHEQEVVPKGSSXXSLVPCIRKRNREXNHLGCLSGVSWPGISXFFHYGALGGEAFGSILLHDANYFPSPRLFRR…
DmelIR48b	MILQQSSNLLKLLLLLAISSVRTQGLNDIIIELNQRLLISNNFLYCNQSDKLNEYEIKYLQHMPPISLMIFTSIESMNFTQVEYNLGADNKLFLIMGNEEPPYDFLHALNLHFQFAEYIIVIDEPVDLKKSTKWLDFVNHLWQQGYVQLLIYTSYDEKLYHKIIFPETVIEETLVEQYISIRGSFNNLYGYPVRVAAYNNAPRSMLYVNRWGKHIFAGFYMRFLRAFIDARNGSFVPVLTPSNSPGNCTLNLVNETVDVCADALAANPAAFSLTHGFRIASANVLVTHAKPLHSYRYLTAPFQWSVWACLVIYVLLVVNFLSFIGWLRSGKWEFSKYLLEVFSSLLFSGFYLKEIRGRERYILFGVLFIAGFVYSTEYLGLLKSMLISEVFEKQIDTFE…
DmelIR48c	MSLLRIILIIIFLRIVSSIPDTIISHLSAELQIKIQIYFGLGNDLYDFSRLDGNYQKIIISHNISEEFKTYHDEPVLIIIRLERDLNLNLATLDVLRSYLTDRQYNDILLIDNDEENLNSYVDIRKAYWNAGFSQVLIYNSQQRTWSIKPYPYLQIRPTSLKEYIENRNTRNLMGYPLRVLVTNDPPHCFVDKDELPGSPNRYKGSIVTMLKIFADQLNATFQANPFREFRRYSTADCVQMVSDDEIDACGSIFIRTYTYATSQPVRLNRVVIMAPFGNPIEKFYYFFRPFDLYVWIGTGIIVVYIAVMGSLLHRWHFKEWNVGQYLLLAVQTLLNRELSLPQSSSGSKFMLLLLLFAIGFILSNLYVALLSMMLTTKLYQRPIENLADLKAANVNILL…
DmelIR51a	MYNVLVLFLLLFTRAQMEPHRRGHNMTLLRSVLTVIRGRENWKNTPIFLGGHCNSDDLNNLMSWLQNTMEVTCHTVDTSTSAKNENALGHFNINADNSLGLLFCQSSHELIWFNMDKRLRRLRGIRLIVILSDKRSSSSKAIMSTFKRLWHFQFQXNFQGYVVSTPVENDIPRVFFVKDKKTGRKQIRGFGYRTFVEYLHRYNASLHVSNSQQEHAINSSVNMGRIINQIVDGQLEISLHPYVDVPENMGDNSYPLLIASNCLIVPVRNEISRYMYLLLPLNQSSWILLLGSVIYISGVLYYIQPGLLHRTWDQRIGLNILDSISRIINICSPSRIYNPSLRYFIVSVHLSILGFVVTNLYSIMLGSFFTTLVVGEQVDSMQQLIQXQQKVLVKYYEVS…
DmelIR51b	MCKVLTLLVVILLLALTNAAYNVTLLKSVLSLISTREPWINTPIFVGHNTQGGDLNDLIIWLHQTMGVTSLTMNLFLQPEHIRPLGHFKITRYNGIALFFCHDKHDIMWLTLDRNLRKLRRIRLIIILRNQRSGSQGAIKSIFNALWQYQFLNVLVLQRDQLYSYTPYPAMRFFKLDIHTEPLFPHAARNFHGYVVSTPAENDIPRVFHVHDPLTKSRKVLGYAYRTFVEYLDHYNASLRLTNPDENLDPTTSVNMNHIVQLIIDGQLEISLHPYVFTPPTATKSYPLLIYPNCLIVPMRNEIPRHMYLLRPFQLYSWYILLFAVFYITGILYCISPKLNKSSWPQRLGLNFLDAISKILFISPPITIYRPTWRHLIIFLQLSVLGFMSTSWYNIELDS…
DmelIR52a	MALGWSVIILGFIGQLSAQILNYTQSRDLELLEGSLFRVLSRLNLEEEYNTLLIYGKECVFHSLLRKLEISAVTVPSGSTDYDWSFSTAILILSCGYDAENEENSYTLMKLQRTRRLIYLEDNSEPESVCMRYSLKEQHNIAMVKSDFDQSDTFYSCRLFQTPNYVEGHFFKDQPIYIENFQNMRGATIRTVADSLVPRTILYRDEKSGETKMMGYLGHMINTYAQKLNAKLHFIDTSKLGAKKPSVLDIMNWVNEDIVDIGTALASSLQFKNMDSVWYPYLLTGYCLMVPVPAKMPYNLVYSMIVDPLVLSIIFVMLCLFSVLIIYTQHLSWKNLTLANILLNDKSLRGLLGQSFPFPPNPSKHLKLIIFVLCFASVMITTMYEAYLQSYFTQPPSEP…
DmelIR52b	MTWLVILLCFLGYMAAHIADISVQNQSLMDNELINLLLKLRNEEFYDTLLVYGKDCEFHSVIKNVDVAVVLVSDSMNFEWNFSSLTLILSCGPDIDNGGPNSTSIKLQRNRRLVLLKEDFQPSNICNIYTQKEQYNIALVRENFTKSKSIYTCRYFQDPNVDEVNLSGTKPIFIEQFQNMKGKAIRIVPDLLPPRVMLYQDANDGELKMIGYVANLITNFAQKVNATLQLDFLKPSTSITEISRMAKDDELDMGITLEASLNTSNLETSSYPYLLTSYCLMVQVPAKFPYNLVYALIVDPLVLGIIFVLFLLLSVLLIYSQKMSWQDLSVANILLNDKSLRGLLGQSFPFPLNASKKLRLIFTILCFASIMLTTMYEAYLQSFFTNPPSEPEICSFQDV…
DmelIR52c	MVWLIIILFCLGNSSSQILDVTNNSHLDFDYRLFGLLQRLQVEKSYDTLLVYGEDCAIPSLFERLQVPAVLVSSGSTNFDWNFSSLTLILSCNFQDEREENYRTLMKLQTSRRLILLKGHIKPESVCDFYSKKEQHNVAMVKENFYQLEVVYSCRLFQDQNYEKLNLFDGKSIYKDQFRNMHGAPIRTLSDKEPPRTIPYIDSKTGEEKFKGYVGMLISQFVKKVNATMQIREDLIKDDEEVSFVDITNFTSNDILDIGICEARTLEMSNYDAISYPYLMSSYCFMAPLPDSLPFSDVYMAIVAPSILIMFLIIFCICSVLIIYIQERSYRSLTIRSVLMNDICLRGFLAQPFPFPRQYNRKLKLIFMLVCFSSLISTTMYTAYLQAFLWGPPIEPRLT…
DmelIR52d	MVRIIIILLCLGYTKARILDATNTNHTDLEERLLSLLLRLQQEQFFNTLLIYGEDCAFSSLSRRLQVPTILVSSGSTSFEWNYSSLALILTCEFKAEREENYQTLKKLQMNRRLILLNGNIKPDSVCDFYSKKDQYNIAMVNNNFHQVGIIYACRLFQERNYEKVYLSEGNPIYVDQFRNMQGALLKSITFNLIPGSMAYRDPKTGQEKHIGYVANLLNNFVEKVNATLDMQVKLHKAGKKTSFYNITKWASEDLVDIGMSYAAYFEMTNFDTISYPYLMTSTCFMVPLPDMMPNSEIYMGIVDPPVLVVLIAIFCIFSVMLNYIKQRSWRSLSLVNVLLNDICLRGFLAQPFPFPRQSNRKLKLISMLVCFFSVITTTMYTSYLQSFMWGPPIDPKMC…
DmelIR54a	MWTVITGIVLWAPVLVAGSAVDFIFRAAAEHSLSVIMIRIDYCPYNWAKDIFENQTIPVVVLSDSETFINIRMFSRPLHVACLPGHELQKDLALLENFTSSLMDFPSQKKIVYISNNFSDPTRMDYIFETCYHRRIWNIVGLLASDEHRYFYRYHLYPSFRTEYRSLESSTIFDKDFPNMHGHPLTVMPDQWLPRSVLYVDRRTGKQILAGSVGRFFHVLSWKLNATLQLSKKVTTGRFLNATALKELSESFSVDVPASLTIMERVEQLASTSYPMEVTHVCLMVPVARRIPIKDIYFILSSASNMFLAIVIVSSYGLALNLLRNMTHRDVRLVDFVLNDKALRGILGQSFNLPLSRSFSTRLIFLMLGIVGLNVSSIFGAGLDTLMAHPPRQFQARSF…
DmelIR56a	MGSRFFIRNLILFGLLASSNMQIPFGELEKKFELDVDFLLGVTELVGHIQGLYSITVYADCIDIHPSIQQRIMDKFMVPVNTIGSNLSRPNYHKLDNSRIRIVLFTGLNDTILVNLNKTDVPYSDNFYMLAYASAIKNKCIELDFIEEVFTLLWKMSIQNAILLIRGEFMMEMWSYLYMGKIHKIKLTKPNSYLESLRKYNYRFSLEVINDPPAIFWYNSSEQADVTGGGNLSVSGPLGLIIINFLRHLNVTIDIVPIPGKQTSQYELFQQPDNLRAENGVNMVGSALLKYSPMVTQSRMCLLVSNRRMIPFSRFLDRLVSPGVHKLTFVSSIGIFVIKYFSHRPRSFVDAIFCTIRFFFAIPLPSIILNRLPVVDRFIEVFIIIFVQILLSSNISITT…
DmelIR56b	MLLDTDLASGVIRSPYSFDIPHAFIFNETQFVVPKFCGPYMEIVKHFAEVYHYQLFLDSLESLPKKSVVEQDIISGKYNLSLHGVIIRPEETSDFFNATQHSYPLELMTNCVMVPLAPELPKWMYMVWPLGKYIWTCLFLGTFYVALLLRYVHWREPGNATRSYTRNVLHAMALLMFSANMNMSVKLKHASIRVIIFYTLLYIFGFILTNYHLSHMTAFDMKPVFLRPIDTWSDLIHSRLRIVIHDSLLEELRWLPVEYQALLASPSRSYAYVVTQDAWLFFNRQQKVLIQPYFHLSKVCFGGLFNALPMASNASFADSLNKFILNVWQAGLWNYWEELAFRYAEQAGYAKVFLDTYPVEPLNLEFFTTAWIVLSAGIPISSLAFCLELFIHRRKQRRP…
DmelIR56c	MRSSFRICLFLLTTYHPSHGWNMQHLLNLLAPFGRMNVFQEIVWFVSPHQRLDQLDEFIMRIDEAFGKSATQTVVNNNTEMRMIYSSARRNHMSFVFTTGAEDPIMKVFSKVLLGRHFYVSMVIYVDKVGDMHPIYDLLTFAYNQQFFNSMVHFESMEGVNQLFGVSKFPVMSFENRTDFLKYMGKIWKQVQNARSDVGGFGFTTPLRQDLPHLFQSQGHYDGSTYRIIETFVRFINGSFKELIMPPDSLGGQVINMKDALQLIRERKMEFCAHAYALFMSDEELEKSYPLLVVQWCLMVPLYNSVSTYFYPLQPFDWNVWFFALGALLALVLLELMWLRMFGGWSGYRGAVLNSFCYIINVPIEGQLQQPCLLRFLLLATVFFHGFFLSAYYTSNLGS…
DmelIR56d	MDNRAAELILRERNIFPTNGSDNITLLNNMFVLEMFYRITQLYHFKNFIFYISERLDLNNKDSQEFFHNFWTYFPMAPNLIITREHHLGIPMMQFISTPSLVMVFTTGKDDPIMELASHNQQGIHWLKTIFVLFPSLQSRDFETNPESLAQFTAEIKDVYDWVWRKQFINTFLITIKDNVFILDPYPTPSIVNKTGVWQAEEFFHKYAKNMKGYLVRTPILYDMPRVFKSDRPTNRYEKNFIHGTSGNLFLGFLEFVNATLMDTSANVTADYLNMTNLLDLVSQGVYETLIHSFTEITTKFVVSYSYPIGINDCCIMVPYRNQSPADQYMHEALQENVWVLISLFTLYITVAIYLCSPLRPRDLSAAFLQSICTLTYSVPTFIIRTPTLRMRYLYILLA…
DmelIR56e	ERXAFRNQWAFCFPRTXAIEVVLSAWSPXCPGQRSKPQPISXPHHXGSCWRKRKWKXKPRLLVVDKRTLVEHLNSLNDGYAYCIIAGHWQVGMM
DmelIR60a	MWCNNPGLIIIIFLGQILNLCQGIVNLSNETANTVIFMLPEKDLGPDVWKAGVGCLDSFAQIFFFRNPKERFTRAYNLMLVHAFHLSSPADQIQEGFSKLINEAVTNPGPPDREELFQMRVASDYNITNGTEDKGELILADNYVIVVDSVDRLKELMKKKIVEMRSWNPGARFLVLFHNATCRNRPLGVASNIFKDLMEMFYVHRVALLYANSTMNYNLLVNDYYSNVNCRILNVQSVGQCHDGKLYPNNAVVKASMQDYVSGFSPRNCTFFACSSISAPFVEADCILGLEMRILGFMKNRLKFDVNQTCSLESRGEMDGPANWTGLLGKVQNNECDFVFGGYYPDNEVADHFWGSDTYLQDAHTWYIKMADRRPAWQALVGIFEAYTWIGFILILIIS…
DmelIR60b	MRRSLYLIIAIGLVDVHCVSLRYILNALENELQYRAILLVESASEIESCWEQKYIQGAVPILNFNANQSLYLKDALNTNILALVCLNENVESTMQALYENLEDMRDTPTILFVLSDSKVQDVFLECLRRKMLNVLAFKGLDRGFVYSFRAFPTFRVIERNVMDILQYFEQQLEDLGGHTLTTLPDNIIPRTVVYKSPDGSRQLAGYLYPFLRNYVSTINATLKVCWHLVPEDGMIQLGEVVRLSEIHDVDFPLGMHGIEHGSTSQNVPLEVSSWFLMLPMEPSLSRAQFFIMLGFEKVTPVLLLLTILLSTAHRIEMGLRPSWRCYVLGDRVLQGTLGQAFFLPRRLSVKLMLVYSLILLNGFTFSNYSITSLETWLVHPPSGHPIHSWEQMRTLNLKV…
DmelIR60c	MEMRLALFFTFACLAGAHDGSLRNMLKSLEDELGYRTILLLEGFVYSFKAFPTLRVVKRRVKDVRRYFEPQLEDLGGCVLKVVPDGIMPRTMVYQGEDGELQMGGYLSHFIRNYVSTINASLQIRWDLFPEDGDFDMDSLTGSNHVDFPLGLGSLSFQTLHKDVAMEISSWFLMLPMEPSLPRARFFIRFGISLYLIPLIILLAIVLSNAHRFEAGLTPSWRCCSMGNTVLRGVLAQAFVLPKGLSPKLMFVYWLLLVSGFFVSNYVIVYLTAWLIQPPTSDPVTDFDQMRRAKLKILMVPTDMDYLKSIRGAEYVDAHSDVFQTADSTDFQTQRMSMELHFAFSVTGTLWPLLRQAQVKLHRPIFRRSKEMVFLPFVIMGMTMPNNSIFLSSLKQYRL…
DmelIR60d	MRLAIYVAFLSSIGNRSGFLSSLLMSLGKELHYKTILLVGGSSTCWSLEPFETGVPILNLRGENNAYPQDTFNSQMLALACLQTESEDAVKLLYRSLKDMRDTPTLLFASSEEHIHDTLFLGCFRENMLNVLALTASSKEFIYSYQAFPTFRVIKRKLVEIHRYFEPQLKDLGGHIVSALPGNIMPRTMCYRNAEGERQLAGYLNTFIRNYVESINGTLRISWGLVPEDDMRHLTISRLSKIQHVDFPLGIIPLYNKTDKQHVYMEISSWFLMLPMETSVPRAHLFVKLGLERLLPIIVVVGAVLGNAHRIEVGLGPSWRCYYLADKVLRGALAQPIVLPRRLSPKLMLIYSLLLLSGFFLSNYYMASLTTWLVHPPASDRILEWDQLRYLHLKVLTIP…
DmelIR60e	MVIKMISFLLVSVLLCLVGASDSESMQVQVLQDLNLALQTELNVFIDFECCATSEILHKLDSPRILLSSNSREARDLRIRGNFTESTLIIVSVMDSDLNPLVASLLPRLLDELHELHIVFLSNEEPGFPKQDLYTYCFKEGFVNVILMSGKGLYSYLPYPSIQPISLSNVSEYFDRARIIRNFQGFPVRILRSTLAPRDFEYSNEQGGLVRAGYLFTAVKELTYRYNATIESVPIPDLPEYDVYLAVAEMLHTKKIDIVCYFKDFSLEVAYTAPLSIIREYFMAPHARPISSYLYYSKPFGWTLWAVVISTVLYGTVMLHLAARGARVEIGKCLLYSLSHILYNCHQKIRVAGWRDVAIHGILTIGGFILTNVYLATLSSILTSGLYDEEYNTLEDLAR…
DmelIR60f	MRFHLNIANSGLLGLHLCPTRSALPEQNPCFSKAGAVIXNLTLPWRRWRERCLLGALRPXTLPTPELQCXSKYLPXRKSQQENASSGLPGFCXGDXQTELHRGSRAIALPRSPYHDLYYVWIAYLGGTMIGIGMLAVEIACFKWDLLRRPPIXMY
DmelIR62a	MYLQFLFALFLSRYQIVATENFDRAFELALFLDRIGRVHRLHAITIVNSLGSVDPSYLDDLHRGLMCNSSNHFYMLPQMTATDKDSSHVHFSSLQDEETIYLVFARDSKDAVIYLQAERARGRRYTRTMFLLRKQESQKDIKYFFELLWKLQFRSALVVVAARNFYQMDPYPTVRVIRMRRLSSYDPHHVFPPANRKNFRGYRMRLPVQQDVPNTFWYKNRRTKAWELAGLGGILINQLMMHLNVTMDLFRFEVNGSSLLNMAALTDLIVKGKVELSPHLYDTLQSNTSVDYSYPTQVAPRCFMIPLDNEISRSLYVFLPFSLTMWLCLLFVLLVVHFVYVRRLIPDGHFWAILGVPGAGQVRYGNRKPVRRFSTFLILFGIFILGQTYSTKLTSSLTV…
DmelIR67a	MLPILVPVLLLFNETSWINPILTSIYKDRHHETVLLLQHSQHGNASGLERFPWPVFSFNEQMDFYVRGKYNSEMLVLIWQTGNSDWDLDLWQALDRSLLNMRKVRVLLLRKWEKIPTADVAATAEHLLFLHVAVIGQGNRIYRLQPYAPQSWLQVDPIESPIFIKIRNYFGRYIVTLPDQFPPRSIVYRNPKTDEIQMTGYVYKFLLEFIRIYNFTFRWQRPIVQGERMNLILLRNMTLNGTINLAISLCGFETPSXLGVFSDVYDMEEWYIMVPRAQEISIADVYVVMVSGNFLIVLIIFYFIFTILDTCFGPLLLKERVDWSNLMLNERMISGIMGQSFNMSARNTISSKVTNATLFLLGLVLSTLYAAHLKTLLTKRPTSQQISNFKQLRDSPVTV…
DmelIR67b	MELLYLNTLQSLSLLEGNRLVQTVQELNNIYQTELNVFLEFGNGADILESAQGTFVPTLWIKNPQNQKVMKGNFTSCTLTILYLEDEHLDRGLYYLANWLWEYHHLEVLIFFNGGSYDKLIQIFSRCFNEGFVNVLVMLPGSDELYTFMPYQDLKILNLKSIKEFYSLSRKKMDLNGYNITSGLVIAGAPRWFSFRDRQNRLILTGYMLRMIVDFTNHFNGSVRLMNVLTVNDGLELLANRTIDFFPFLIRPLKSFSMSNILYLENCGLIVPTSRPLPNWVYLLRPYAFDTWIAWLIMLIYCSLALRILSKGQISISAAFLKVLRLVMYLSGSRDMGTRPTTRRLFLFVILTTSGFILTNLYVAQLSSNSAAGLYEKQINTWEDLDKSDSIWPLIDVDI…
DmelIR67c	MFCWLIFLNIILLSDRSESWSAREVIHQFNHDQQLQLNIYLDCNDVELQIGQEVSNLFVNSTADKMKILGRFSSHSLIIACFKDSTRNRTLNGVKELLWGLQYLPILFVVDSNMDFYFQQALRHGFIHVLALNFMNGSLYTYKPYPKVEVHQIKDMQKFYKLTKLRNLQGQAVRTTVETMTPRCFRYRNRHGQLVYAGYMYRMVKEFISTYNGTEEHVFGNVDTVPYKEGLAALKNGEIDMMPRIIHALEWYYFYRSHILYNIKTYIMVPWAEPLPKSLYFIQPFRGTVWITIMVSFVYASIVIWWIRYRQQGNSSLTQSFMDVLQLLFQLPLSKIWHFNMGTHQVVSFIVLFVFGFMLTNLYTAQLSSYLTTGLFKSQINTFDDLFREKRTLLVESFD…
DmelIR68a	MRCLWILIVAFISLAMATSIPIPIANPAPLSGYEMQLKILLQKILWVANVKRCFAVITDDLHYPIYDRIFFESVGRRVIPFFVMRTNESDDLQRPSRQVELFVKAIKSSDCELNVITILNGWQVQRFLGYIYDNRSLNMQKKFVLLHDLRLFESDMIHLWSVFIDAIFLKRQLDNKYTISTIAFPGILSGVLVMKNIANWELGKGLNGRILFADKTSNLFGTSLPVAISEHVPMVLWANATKSFQGVEVEIMNALGKALNFKPVYYKPNQTENMDWTELDGGASVAYGSGNPDGYAQNGTHIDSMLVDEVAAHSARFAIGDLHLFQVYLKLVELSAPHNFECLTFLTPESSTDNSWQTFILPFSAGMWVGVLLSLFVVGTVFYAISFLNAIINGNVSSE…
DmelIR68b	MKFLVGLLLQWYLPGIYALAEIACRIAVEQNVQVTYLYRCASCPASFDADYSALELDLYRCVGSRLPVITRNMEAHELEPFRRTDSLSIFQIPAAEKGDSLVRRILDMLNPHQRRKHMHKYLFVWPNAGRHQLLRLFRGSWAKKLLYGLAITGRENGTFDFDPFAWGGLQVIQRLDGEVPYARKVKDLRGYPLRFSMFTDPLMAMPRSPVETAGYQAVDGVAARVVGEMLNASVTYVFPEDNESYGRCLPNGNYTGVVSDIVGGHTHFAPNSRFVLDCIWPAVEVLYPYTRRNLHLVVPASAIQPEYLIFVRVFRRTVWYLLLVTLLVVVLVFWVMQRLQRRIPRRGVIQFQATWYEILEMFGKTHVGEPAGRLSSFSSMRTFLMGWILFSYVLSTIYF…
DmelIR85a	MSIQWLKHILLLAILVNLAGTRENHIPLDLKKSSIVMVKMSQILCKARIKVLFVYFENQTSHEHTGQILKEVTKCDISNQNTPLEAVKDDGILMYMVMITTNISQPLELSLIRKKSAAKHRSHVFLLVRDADTVSDAWMRASFRQFWKIWLLNIVILYWRDGRLNAYRYNPFMDNYLIPVDNKPNEVPTLEQLFPKTIPNMQRKPLRMCIYKDDVRAIFWRQGTILGTDGLLAAYVAERLNATMMITRPHSYNNHNLSSDICFLEVAKEYVDVAMNIRFLVPDTFRKQAESTVSHTRDDLCVIVPKAKTAPTFWNIFRSFGSLVWALILVSVLVANVFCYILKSEVGRVPMQLFAGALTMPMTQIPPNHSIRLFLIFWLYFGLLICSAFKGNLTSMMVF…
DmelIR87a	MSTPEQRFWLAALLFLLSQHSEVRGFGINLMKVQTEDKGQEACILALLRKYFDSGDGLSGSVLCINRNYQLPNIEEQLLRGVNNYENYPWSLLITNSREGPSPAKFLMNEKPQCYFLIVDNLEDEDLDEVFEHWKGMVNWNPLAQFVVYLASLEETDEEMNDLMVELLLTFINKKIFNVNVIGQSEENQFYYGKTVFPYHPDNNCGNRVISVELLDACDYPSEETDSEDENDEDEGDGAQEEDDGPQEEGDGEQEEEDGPQEQEDGDQAKGDEGQENDDGGLENKVENEFRIGASDDDELENDLSSNSSEPEAIIEEFFRAKFEDKFPRDLSGCPLTASFRPWEPYIFRNSEEQPVDDYYYGLQGDEDDYNDTSPNYGESDDESYADPGEDGDGAIPDT…
DmelIR94a	MALPKQLKFINIFLVLLIIYGSSDGTENQHEIFLNRLLQAVHNERSVETLFLLHHSNLANCSLQDWNPPRIPTIRSNELTVFNVEKTFNHNALALVCLMKNSYREILNTLAKSFDCMRQERIILMIHRKSDSKFIEDITHEVKNLQFLHLIVLIVQEKYNGQVFASTLRLQSFPEPHFKRIRNVFAIQRIFYRPINFHGKVLNAIPNDIPILFVALNEMFTEYARRYNSTLRIQNRTIKEDIEITEDNYDIDMKIQLHNSQNFLHHMNIAMDIGSNSLIILVPCATELRGLDIFKELGVRTLTWLALLFYIIFVLVEMLFVFISNRFNGRNFTMRYTNPLINLRAVRAILGQTSPISNRYSLSIQHFFVFMSLFGTLFGGFFDCKLRSFLTKRPYYSQI…
DmelIR94b	MSLIFNLLFILILSQAVSQETEFLQLKYLNNIVRSMIKLHKMETLVIVKHHLDNNCSLQNWNAHGMGIIRTNDQGKLIMKDTFNSRTLAIICIGQNSHITLLRNVFETFGKVQQKKIILWTQMELKEKFFQEISKKSRDLKLLNLLVLKAVTKDKLLIYRLNPFPSPHFKRIENIWTPNDTLFMDTKFNFHGMTAVVKHDYNWTIQMGNIRKFPISRIEDKEVIEFALKYNLTLQFFNDVERFDIELRKRIILKSNSTQPIDSGIPMVFSSLLIVVPCGNYLSIQDVIKVSGIEKWIFYIILVYVIFVLIEITFLGVTILISRQSRHQMIPNTLVNLCAFRAILGLPFPETRRTSLSLRQLFLAIALFGMIFSIFINCKLSSMLTNPCPRPQVNNFEEL…
DmelIR94c	MSKVFKLLVLPLIYLSLTKGSKNPQLKFLRELINVIEEGREIRTIMVIKHSRDEYCHLDQWNPRGSPILRTNEMGSIRISGYFNDQAVILACMGENSDYGLLKSLANAMDNMRQERIILWSEREPTKMLMDYISQQADRYNFAQIIIVTMNEDVDAVPSLHQLNPYPTPRFRQITNISNIRRTSFFGCGLSFQGKTAILKESVVSNIRFKVWSPSGPIPLSELKDYEIVQFAVKYNLSLKLYDQNESKSDHFDIQLGPLFITKDFPTQMAFVSPNTACSLIVIVPCSPKWRFMDVLHKLGVLKLIGCLLIAYAVFVLIETLILWLTHRISGREVRLTSLNQLLNPRAFRGILGLPFPEFRRSSISLRQLFLVISVFGLVYSNFVSCTLSALLTKPAQNP…
DmelIR94d	MGQLHLLLVALVLLSPGGDSFYHSLIHHLNRELKIEYVLLLGNFDTTWLDILWQLPVSVLQIKEHSRETYSLLENPSHNVLTIAFVNDSPEDILEILYRNLRMLNTQPVLLVIRKSTIRVNSLLEWCWHHQLLKVVAIAQDFMESLIVYSYNPFPVLQFIERRLDNSTVIFEKRLENLHGYEVPIALGGSSPRLIVYRDLEGKLIFSGPVGNFMKSFEQRYNCRLVQPYPFDESAISPARDLIASVQNGSVQIALGAIYPQVPYTGYSYPIELMSWCLMMPVPEEVPHSQLYSMVFSPMAFGITIVAMVLISLTLSMALRLHGYRVSFSEYFLHDSCLRGVLSQSFYEVLRAPALIKAMYLVICLLGLLITSWYNSYFSTFVTSAPRFPQLTSYESIRH…
DmelIR94e	MDCPKWILSGLCLISLVSGATVIELLGTLKLELDFEYVLLMKNRNFSLSDQVWNGTSLTKDVMDEVQVPVLQFNENVSYFLHNSISRRLVTLGFMSDANLDEHRGLLTALVANLRHMTTSRVIFLVQSKASTDFLYELFRNCWRKKLLNVIVIFQDFETTSTFYSYSNFPILQIEERIYETSLQTLPIFPDRLRNLHGYEMPVILGGTAPRMIAYRNKKGNVVYDGTVGHFMTAFQQKYNVKFVQPLQAKNPLDFAPSMQTVGAVRNETVEISISLTFPTIPPFGFSYPYEQMNWCVMLPVEADVPPFEYYTRVFELAAFLLTLGTLVLISCLLASALSLHGYATNISEFLLHDSCLRGVLGQSFVEVFRAPTLVRGIYLEICVLGILITAWYNSYFSS…
DmelIR94f	MSGMWQQVLLAETSNWFRSDVLQRFWTHLRVEIRFRTMLNYRLESCDCWFDNVLGSDNSTALLWNDQTYPHYLRRRQDTDILVVSCLRFHQYQEVLLALSLMLDQMRSMPVVLQLCGDEDSMQELNSARLLLKHSQDLKMPNVVLLSSTFFTSATLYSYEMFPEFNVQKLVYQAYLTLFPYKLGNLKGHPIRTVPDNSEPLTIVRKTLNGSIAIDGLVWQFMIEFAKHINATLQLPIEPHPEKSIKLVQILDLVRNQTVDIAASLRPYSLNVQRSSTHIYGSPMMVGNWCMMLPTERVIGSHEALTRLMKSPWTWLILLLFYSVHRFLAQKTRLRSSLIHLIKLLINLSLICFLQAQLSAYFIGPQKVNHISNMQQVEESGLKIRGMRGEFMEYPIDMR…
DmelIR94g	MSTAVNSVHSKLVSLISRGQELTSIFFYAPAKEKCHLEDTISSATWGLPLVIWRTDRTVILNGFIGEGLLVLACLPGFHWRALLGSLARSLKYLRQARILIELMQDRDEFLVSEVLQFCLSQDMINVNAIFDDFPETENLSSFEAYPSFEVVNQTFTPDTQVSDLYPNKMLNLRGGVIRTMPDYSEPNTILYQDKEGNKEILGYLWDLLEAYAHKHNAQLQVVNKYADDRPLNFIELLDAAQSGIIDVGASIQPMSMGSLSRMHEMSYPVNQASWCTMLPVERQLHVSELLTRVIPYPTLALLLLLWIFYEVLRGRWRRHSRLQSIGWLVLATLVSSNYVGKLLNLFTDPPSLPPVNSLAALMESPVRIISIRSEYSAIEFTQRTKYSAAFHLALHASI…
DmelIR94h	MLSNISFSSAPELVDLYGLVLKFLVSSETTLFYFNPTGQKCSWETLPRTILSNHPQIIWFREETYPGLYKRHSSNLFVMACLSSTSYDGQLQLLAESLTRYRSVRVLIEVQDKEGSFLASQILLLCQQHSMLNVVLYFSRWTRTLNVFSYLAFPYFKLLKQRLSGSLRPKIFINQLKDLQGYKIRVQPDLSPPNSFSYRDRHGECQVGGFLWRIVENFSKSLKGDTQVLYPTWAKAKVSAAEYMIQFTRNGSSDIGVTTTMITFKHEERYRDYSYPMYDISWCTMLPVEKPLSVEILFSHVLSPGSALLLILAFILFFLIVPQLIKCLGITFRGRLIGMASRIFALVMLCSSSAQLLSLLMSPPLHTRIKSFDDLLTSGLKIFGIRSELYFLDGGFRAK…
DmelIR100a	MATTLQLIMLALVGGTLGQANNTDHKQVLTSIVKQLEGGLELHLRTSEDGGNDLVQFLMQEKSSIIISAKQEEVPSRAKIMRHHFFIFDGVHQMQEIRTSLFNTDGFYILALENNTIEDDVLLMEFAADVWLQHGHSRIYYVQLSKKSVLLFNPFLQRLVVVQDSKTYSRIYKDLEGYHLRIYIFDSVYSSVIGDGENKVLSVTGADAKLAKTVARQLNFTADFVWPDDEFFGGRLANGEYSGGVGRAHRGEVDIIFAGFFIKDYLTTHIQFSAAVYMDELCLYVKKAQRIPQSILPLFAVHMDVWLCFLLVGLLGALVWLILRAVNLILGIEGVPDGSRATRISYFGAARRIFVDTWVIWVRVNVGRFPPFHSERIFVASLCLVSVIFGALLESSLAT…
RpedOrco	MQKIKMHGLVGDLWPNIRLMQLTGHWLLEYHEETGGMIRLIRLGYCWLTTVLVVLQFAFLACFLILDTYDADQMAAATITTLFFLHSVTKFGYFAVRSKYFYRTLGAWNQVNSHPLFAESNARHRATALSRMRKLLMIIGVITIFSVLAWTTVTFLGDPHREITDPENENATITVEMPQLMVDAWYPWDAKTGMTYFLTFIYQLYWLFMSLSHANLLDILFCSFVIFACEQLKHLKEILQPLMELSATLDSVVPNSGDLFRATSTGSNLPLISNENGNDFDIRGIYSNRGDYSGFQTGVSTIQNNGGGIGPNGLTKKQELLVRSAIKYWVERHKHVVKFVSSIGDAYGSALLLHMLTSTVTLTLLAYQATKIEGVDVYASTVIGYLLYTLGQVFVFCIH…
ApisOrco	MYTFSTNMGYKKDGLIKDLWPNIRLIQLSGLFISEYYDDYSGLAVLFRKIYSWITAIIIYSQFIFIVIFMVTKSNDSDQLAAGVVTTLFFTHSMIKFVYFSTGTKSFYRTLSCWNNTSPHPLFAESHSRFHAKSLSRMRQLLIIVSIVTIFTTISWTTITFFGESVWKVPDPETFNQTMYVPVPRLMLHSWYPWDSSHGLGYIVAFVLQFYWIFITLSHSNLMELLFSSFLVHACEQLQHLKEILNPLIELSATLDSSVHNPAEIFRANSAKNQSINGIDHDYNGSYVNEITEYGTKGENEPNRKGPNNLTSNQEVLVRSAIKYWVERHKHVVKYVSLITECYGSALLFHMLVSTVILTILAYQATKINGVNVFAFSTIGYLMYSFAQIFMFCIHGNEL…
CelcOrco	MQKVKMHGLVGDLWPNIRLMQLTGHWLLEYHEENGGIMRLLRLAYCWITTLLILVQFGFLVCFLILETYDADQMAAATITTLFFLHSVTKYLYFALRSKYFYRTLSAWNQVNSHPLFAESNARHRATALSRMRKFLMIIGVGTIFSVLAWTTVTFLDEPYRDITDPDDVNSTITVEVPQLMVDAWYPWDARTGMAYFLTFIYQLYWLIMSLSHANLLDILFCSFVIFSFSLKHLKEILQPLMELSAALDSVVPNSGDLFRASSTSSNIPLIGNDVNEFDVRGIYSNQRDFSGFQGGAIPTNGGIGPNGLTKKQELLVRSAIKYWVERHKHVVRFVTSIGDCYGSALLLHMLTSTVTLTLLAYQATKIEAVDVYASTVIGYLLYTLGQVFVFCIHGNELI…
HhalOrco	MQKIKMHGLVGDLWPNIRLMQLTGHWLLEYHEETGGMVRLIRLAYCWLTTFLVVMQFAFLACFLILDTYDADQMAAATITTLFFLHSITKFAYFAIRSKYFYRTFGAWNQVNSHPLFAESNARHRATALSRMRKLLMIIGVITIMSVMAWTTVTFLGDPHREITDPEDVNSTITVEMPQLMVDAWYPWDAKTGFCFFATFIYQLYWLFISLSHANLLDILFCSFVIFACEQLKHLKEILQPLMELSATLDSVVPNSGELFRGGSGGSNMPLVENDGNDFDIRGIYSNRGDFSGFGQTAVSTIQTNGNGIGPNGLTKKQELLVRSAIKYWVERHKHVVKFVSSIGDAYGSALLLHMLTSTVTLTLLAYQATKIEGVDVYASTVIGYLLYTLGQVFVFCIH…
AfasOrco	MQKVKMHGLVGDLWPNIRLMQLTGHWLLEYHEETGGMARLIRIAYCWMTTFVVYLQYAFLVCFLILETYNSDEMAAVTITTLFFLHSVTKFTYFAIRSKYFYRTLSAWNQVNSHPLFAESNARHRAAALSRMRKLLMIIGVVTILAVFGWTTVTFLDDPVWDKTDPDNVNETISVEIPQLMVYAWYPWDAKTGMTYFMTFAPQLYWLFITLAHSNLLDVLFCCFVIFSCEQLKHLKEILQPLMELSAALDSVVPNSGDLFKSGSAGSNVALISNGDGGNDFDVRGIYSSQRDFSGFQGGMTNGTTVGPNGLTKRQELLVRSAIKYWVERHRHVVKFVTSIGDTYGTALLLHMLTSTVTLTLLAYQATKIEGVDVYASTTIGYLVYTLGQVFVFCIHGNE…
AlinOrco	MQKVKMHGLVGDLWPNIRLMQLTGHWLLEYHEETGGMARLIRIAYCWMTTFVVYLQYAFLVCFLILETYNSDEMAAVTITTLFFLHSVTKFTYFAIRSKYFYRTLSAWNQVNSHPLFAESNARHRAAALSRMRKLLMIIGVVTILAVFGWTTVTFLDDPVWDKTDPDNVNETISVEIPQLMVYAWYPWDAKTGMTYFMTFALQLYWLFITLAHSNLLDVLFCCFVIFSCEQLKHLKEILQPLMELSAALDSVVPNSGDLFKSGSAGSNIALISNGDGGNDFDVRGIYSSQRDFSGFQGGMTNGTTVGPNGLTKRQELLVRSAIKYWVERHRHVVKFVTSIGDTYGTALLLHMLTSTVTLTLLAYQATKIEGVDVYASTTIGYLVYTLGQVFVFCIHGNE…
AsutOrco	MQKVKMHGLVGDLWPNIRLMQLTGHWLLEYHEETGGMARLIRIAYCWMTTFIVYLQYAFLVCFLILETYNSDEMAAVTITTLFFLHSVTKFTYFAIRSKYFYRTLSAWNQVNSHPLFAESNARHRAAALSRMRKLLMIIGVVTILAVFGWTTVTFLDDPVWDKTDPDNVNETISVEIPQLMVYAWYPWDAKTGMTYFMTFALQLYWLFITLAHSNLLDVLFCCFVIFSCEQLKHLKEILQPLMELSAALDSVVPNSGDLFKSGSAGSNIALISNGDGGNDFDVRGIYSSQRDFSGFQGGMTNGTTVGPNGLTKRQELLVRSAIKYWVERHRHVVKFVTSIGDTYGTALLLHMLTSTVTLTLLAYQATKIEGVDVYASTTIGYLVYTLGQVFVFCIHGNE…
AlucOrco	MQKVKMHGLVGDLWPNIRLMQLTGHWLLEYHEENGGMLRLLRMAYCWMTTFSIYIQYAFLVCFLILETYNADEMAAVTITTLFFLHSVTKFTYFAFRSSYFYRTLGAWNQVNSHPLFAESNARHRATALSRMRKLLMIIGTVTILAVFGWTTVTFLDEPVWDKTDPDNVNETISVEIPQLMVYAWYPWDARYGMTYFMTFVFQLYWLFITLAHSNLLDVLFCCFVIFACEQLKHLKEILQPLMELSAALDSVVPNSGDLFKAGSAGSDIALIGNGENGNDFDVRGIYSSQRDFSGFQGGVVNGGTVGPNGLTKRQELLVRSAIKYWVERHKHVVKFVSSIGDTYGSALLLHMLTSTVTLTLLAYQATKIEAVDVYAASTIGYLVYTLGQVFVFCIHGNE…
TeleOrco	MQKIKMHGLVGDLWPNIRLMQLTGHWLLEYHEETGGMVRLIRLGYCWITTFLVVLQFAFLACFLILDTYDADQMAAATITTLFFLHSVTKFAYFAIRSKYFYRTLGAWNQVNSHPLFAESNARHRATALSRMRKLLMIIGSITILSVLAWTTVTFLGDPHREITDPENENLTITVEVPQLMVDAWYPWDARYGMPYFLSFIYQLYWLFISLSHANLLDILFCSFVIFACEQLKHLKEILQPLMELSATLDSVVPNSGDLFRASSTGSNLPLISNDNNDFDIRGIYSNRQDFSGFNNGPSTITTNGGGIGPNGLTKKQELLVRSAIKYWVERHKHVVKFVSSIGDAYGSALLLHMLTSTVTLTLLAYQATKIEGVDVYASTVIGYLLYTLGQVFVFCIHG…
YsigOrco	MQKIKMHGLVGDLWPNIRLMQLTGHWLLEYHEETGGMVRLIRLGFCWLTTFLVTFQFAFLACFLILDTYDADQMAAATITTLFFLHSITKFAYFAIRSKYFYRTLGAWNQVNSHPLFAESNARHRATALSRMRKLLMIIGSITILSVLAWTTVTFLSDPHREITDPDNENLTITVEIPQLMVDAWYPWDAKHGMTYFLTFVYQLYWLFISLSHANLLDILFCSFVIFACEQLKHLKEILQPLMELSATLDSVVPNSGDLFRASSTGSNMPLITNDNTNDFDIRGIYSNRADFNGFNNGGVATVNGGGGIGPNGLTKKQELLVRSAIKYWVERHKHVVKFVSSIGDAYGSALLLHMLTSTVTLTLLAYQATKIEGVDVYASTVIGYLLYTLGQVFVFCIH…
ClivOrco	MQKVKMHGLVGDLWPNIRLMQLTGHWLLEYHEETGGMSRLLRMAYCWITTFLVYIQYGFLVCFLILETYNADEMAAVTITTLFFLHSITKFTYFAVRSKYFYRTLSAWNQVNSHPLFAESNARYRAAALARMRKLLMIIGIGTIFAVFSWTTLSFLSEPVWEKTDPEDENATILVEIPQLMVYAWYPWDARTGMTYFMTFAYQLYWLFITLSHANLLDVLFCCFVIFSCEQLKHLKEILQPLMELSAALDSVVPNSGDLFKASSAGSNIALIGNGDGGTDFDVRGIYSNQRDFSGFQGGMNGVNGGTVGPNGLTKRQELLVRSAIKYWVERHKHVVKFVTSIGDAYGSALLFHMLTSTVTLTLLAYQATKIDGVDVYAASTIGYLVYTLGQVFVFCIHG…
