# Supplementary material for: Genome-wide identification of candidate chemosensory receptors in the bean bug Riptortus pedestris (Hemiptera: Alydidae) and the functional verification of its odorant receptor co-receptor (Orco) in recognizing aggregation pheromone
Source: Front Physiol. 2023 Jul 14;14:1224009. doi: 10.3389/fphys.2023.1224009 (PMC10375722; doi:10.3389/fphys.2023.1224009)
Supplement: Supplementary file 5 [file Table1.XLSX]

## Sheet: Sheet1
Supplementary Table S1. Summary of RNA sequencing and mapping using the Riptortus pedestris genome as the reference
Samples	Total clean reads	Overall alignment rate (%)
2nd-instar nymph	27130713	86.13
3rd-instar nymph	23600011	82.91
4th-instar nymph	26348247	81.27
5th-instar nymph	21472411	85.42
Female	22506597	82.73
Male	22989701	80.98
